# Supplementary material for: Unified ionic and radical C-4 alkylation and arylation of pyridines
Source: Royal Society of Chemistry journal article supplement (doi:10.1039/d4sc03739a), 2024-01-01
Supplement: d4sc03739a1.pdf [file d4sc03739a1.pdf]

## *Supporting Information*

# **Unified ionic and radical C-4 alkylation and arylation of pyridines**

Qiu Shi, Xiaofeng Huang, Ruizhi Yang and Wenbo H. Liu\*

School of Chemistry, Sun Yat-sen University, Guangzhou 510006, China

E-mail: liuwb29@mail.sysu.edu.cn

## **Table of Contents**

|                                                                                      |     |
|--------------------------------------------------------------------------------------|-----|
| 1. General information.....                                                          | S3  |
| 2. Synthesis of diiminium ditriflate pyridine salt .....                             | S3  |
| 3. C-4 alkylation and arylation with Grignard reagents as the nucleophile .....      | S14 |
| 4.: One-pot C-4 alkylation with Grignard reagents as the nucleophile .....           | S20 |
| 6. C-4 alkylation with organozinc reagent as the nucleophile .....                   | S29 |
| 7. C-4 cyanylation with TMSCN as the nucleophile .....                               | S30 |
| 8. C-4 arylation with phenyl lithium as the nucleophile.....                         | S32 |
| 9. C-4 alkylation with the enolate as the nucleophile.....                           | S32 |
| 10. C-4 alkylation with silyl ketene acetal as the nucleophile .....                 | S33 |
| 11. C-4 alkylation with nitronate as the nucleophile.....                            | S34 |
| 12. C-4 alkylation with malonates as the nucleophile .....                           | S35 |
| 13. C-4 alkylation with carboxylic acids as the radical precursors.....              | S37 |
| 14. C-4 arylation with aryl boronic acids as the radical precursors .....            | S42 |
| 15. C-4 alkylation with functionalized alkanes as the radical precursors.....        | S45 |
| 16. Late-stage functionalization of drug-like molecules.....                         | S46 |
| 17. Synthesis of 4-(1-tosylpiperidin-4-yl)picolinamide .....                         | S53 |
| 18. Synthesis of VU6001966 .....                                                     | S53 |
| 19. Synthesis of LJI308 .....                                                        | S55 |
| 20. Comparison of two pyridine salt additions with methyl Grignard reagent .....     | S57 |
| 21. GC-MS data for the reaction of 5-chloropentanoic acid and 4h .....               | S58 |
| 22. GC-MS data for the reaction of (4-ethylphenyl)boronic acid and 4h .....          | S61 |
| 23. GC-MS data after oxidation of S-4s and <i>n</i> -pentylMgBr .....                | S63 |
| 24. X-ray data of 4a and 4h.....                                                     | S65 |
| 25. Different pyridine C-4 selective functionalizations via C-C bond formation ..... | S81 |
| 26. References .....                                                                 | S81 |

27. Copies of NMR spectroscopy.....S82

## 1. General information

Commercial reagents were purchased from Energy, TCI, J&K, Accela, Bide, Macklin or Adamas and used without further purification. The anhydrous solvents used in the experiments were all purchased from J&K and used directly. All reactions were carried out with oven-dried glassware or Schlenk tubes. Analytical thin layer chromatography (TLC) was performed on 0.20 mm silica gel HSGF-254 plates (Huanghai, China). Column chromatography was performed on 200-300 mesh silica gel or 300-400 mesh silica gel (General-Reagent, China).

$^1\text{H}$  NMR (400 MHz or 600 MHz),  $^{13}\text{C}$  NMR (101 MHz or 151 MHz) and  $^{19}\text{F}$  NMR (377 MHz or 565 MHz) were recorded on an NMR spectrometer with  $\text{CDCl}_3$ ,  $\text{DMSO-}d_6$ ,  $\text{D}_2\text{O}$ ,  $\text{actone-}d_6$  or  $\text{CD}_3\text{CN}$  as the solvent. Chemical shifts of  $^1\text{H}$  and  $^{13}\text{C}$  NMR spectra are reported in parts per million (ppm). The residual solvent signals were used as references and the chemical shifts were converted to the TMS scale ( $\text{CDCl}_3$ :  $\delta \text{H} = 7.26$  ppm,  $\delta \text{C} = 77.16$  ppm.  $\text{DMSO-}d_6$ :  $\delta \text{H} = 2.50$  ppm,  $\delta \text{C} = 39.52$  ppm.  $\text{D}_2\text{O}$ :  $\delta \text{H} = 4.79$  ppm.  $\text{CD}_3\text{CN}$ :  $\delta \text{H} = 1.94$  ppm,  $\delta \text{C} = 118.26$  ppm.). Multiplicity (s = singlet, d = doublet, dd = doublet of doublets, ddd = doublet of doublet of doublet, dt = triplet of doublet, t = triplet, q = quartet, m = multiplet, br = broad). All coupling constants ( $J$  values) were reported in Hertz (Hz). High resolution mass spectrometry of products were recorded on an LTQ Orbitrap Elite LC/MS (ESI). GC-MS data were collected by an Agilent 5977B instrument. Single-crystal X-ray diffraction of **4a** and **4h**. A pale white block crystal was selected and on a SuperNova, AtlasS2 diffractometer (Rigaku Oxford Diffraction). Single crystal data were collected at 223K on a Bruker D8 VENTURE diffractometer equipped with a PHOTON III detector and with a MetalJet Ga source. Data reduction, solution and refinement used the programs APEX3 and Olex2 respectively. The room temperature ranges from 18 to 35 °C.

## 2. Synthesis of diiminium ditriflate pyridine salt

### General Procedure I:

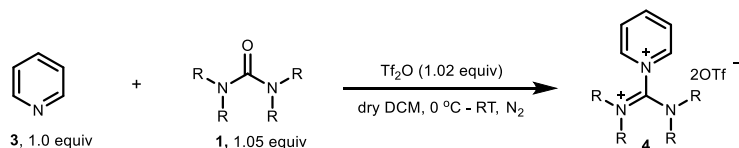

Under a nitrogen atmosphere, different ureas (2.1 mmol, 1.05 equiv) were added to an oven-dried 25 mL Schlenk tube with a magnetic bar. Anhydrous DCM (6.0 mL) was added and the solution was cooled to 0 °C in an ice-bath.  $\text{Tf}_2\text{O}$  (trifluoromethanesulfonic anhydride, 0.34 mL, 2.04 mmol, 1.02 equiv) was added dropwise via a 1.0 mL syringe within 5 minutes and the solution was stirred for 10 minutes at 0 °C (the reaction solution turned pale yellow during this period). Then pyridine (158.2 mg, 2.0 mmol, 1.0 equiv) was added dropwise via a 250  $\mu\text{L}$  micro syringe within 1 minute. The cooling bath was removed, rapid crystallization was observed after circa 3 h and the reaction was stirred vigorously overnight. (Note: Due to the mild hygroscopic feature of the pyridine salt, we transfer the filtration to the glove

box for operation that can be referenced to the literature<sup>[1]</sup>). The reaction mixture was filtered with a buchner funnel with fritted disc and washed with anhydrous DCM (3 × 6.0 mL). The filtrate was removed, and the white solid was dried in vacuum and stored in the glove box to avoid contamination with water.

**(4a)**

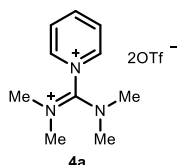

Prepared via **General Procedure I** starting from pyridine (158.2 mg, 2.0 mmol, 1.0 equiv) and 1,1,3,3-tetramethylurea (243.8 mg, 2.1 mmol, 1.05 equiv) to give **4a** as a white solid.

**R<sub>f</sub>** = 0.6 (eluent: DCM/MeOH = 10:1).

**Yield** 877.8 mg (92%).

**NMR spectroscopy:**

**<sup>1</sup>H NMR** (CD<sub>3</sub>CN, 400 MHz) δ 9.17 (d, *J* = 5.8 Hz, 2H), 9.06 (t, *J* = 7.9 Hz, 1H), 8.50 – 8.42 (m, 2H), 3.54 (s, 6H), 2.94 (s, 6H).

**<sup>13</sup>C NMR** (CD<sub>3</sub>CN, 101 MHz) δ 156.8, 155.5, 146.0, 131.3, 121.8 (q, *J* = 323.2 Hz), 44.7, 43.5.

**<sup>19</sup>F NMR** (CD<sub>3</sub>CN, 377 MHz) δ -79.2.

**HRMS** calcd for (C<sub>10</sub>H<sub>17</sub>N<sub>3</sub>)<sup>2+</sup> [*m/z*]<sup>+</sup>: 89.5706, found 89.5709.

**(4b)**

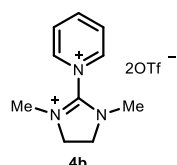

Prepared via **General Procedure I** starting from pyridine (158.2 mg, 2.0 mmol, 1.0 equiv) and 1,3-dimethylimidazolidin-2-one (239.4 mg, 2.1 mmol, 1.05 equiv) to give **4b** as a white solid.

**R<sub>f</sub>** = 0.6 (eluent: DCM/MeOH = 10:1).

**Yield** 807.8 mg (85%).

**NMR spectroscopy:**

**<sup>1</sup>H NMR** (D<sub>2</sub>O, 600 MHz) δ 8.63 (d, *J* = 5.3 Hz, 2H), 8.48 (tt, *J* = 7.9, 1.4 Hz, 1H), 7.94 (t, *J* = 6.9 Hz, 2H), 3.19 (s, 4H), 2.56 (s, 6H).

**<sup>13</sup>C NMR** (D<sub>2</sub>O, 151 MHz) δ 163.8, 147.2, 141.0, 127.4, 119.6 (q, *J* = 318.6 Hz), 44.9, 30.7.

**<sup>19</sup>F NMR** (D<sub>2</sub>O, 565 MHz) δ -79.0.

**HRMS** calcd for (C<sub>10</sub>H<sub>15</sub>N<sub>3</sub>)<sup>2+</sup> [*m/z*]<sup>+</sup>: 88.5628, found 88.5632.



(4c)

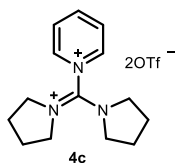

Prepared via **General Procedure I** starting from pyridine (158.2 mg, 2.0 mmol, 1.0 equiv) and di(pyrrolidin-1-yl)methanone (352.8 mg, 2.1 mmol, 1.05 equiv) to give **4c** as a white solid.

$R_f$  = 0.6 (eluent: DCM/MeOH = 10:1).

**Yield** 814.7 mg (77%).

**NMR spectroscopy:**

$^1\text{H NMR}$  ( $\text{CD}_3\text{CN}$ , 400 MHz)  $\delta$  9.32 – 9.24 (m, 2H), 9.03 (t,  $J$  = 7.9 Hz, 1H), 8.50 (t,  $J$  = 7.0 Hz, 2H), 4.25 (t,  $J$  = 6.7 Hz, 4H), 3.33 (t,  $J$  = 6.9 Hz, 4H), 2.15 (p,  $J$  = 6.6 Hz, 4H), 1.96 (p,  $J$  = 6.7 Hz, 4H).

$^{13}\text{C NMR}$  ( $\text{CD}_3\text{CN}$ , 101 MHz)  $\delta$  153.6, 149.6, 144.5, 131.8, 121.8 (q,  $J$  = 321.2 Hz), 55.1, 53.8, 26.7, 24.7.

$^{19}\text{F NMR}$  ( $\text{CD}_3\text{CN}$ , 377 MHz)  $\delta$  -79.2.

**HRMS** calcd for  $(\text{C}_{14}\text{H}_{21}\text{N}_3)^{2+}$   $[\text{m}/\text{z}]^+$ : 115.5863, found 115.5864.

(4d)

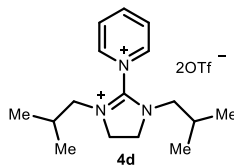

Prepared via **General Procedure I** starting from pyridine (158.2 mg, 2.0 mmol, 1.0 equiv) and 1,3-diisobutylimidazolidin-2-one (416.2 mg, 2.1 mmol, 1.05 equiv) to give **4d** as a white solid.

$R_f$  = 0.6 (eluent: DCM/MeOH = 10:1).

**Yield** 592.5 mg (53%).

**NMR spectroscopy:**

$^1\text{H NMR}$  ( $\text{CD}_3\text{CN}$ , 400 MHz)  $\delta$  9.11 (t,  $J$  = 8.0 Hz, 1H), 9.07 (d,  $J$  = 6.1 Hz, 2H), 8.63 – 8.52 (m, 2H), 4.28 (s, 4H), 3.00 (d,  $J$  = 7.5 Hz, 4H), 2.05 – 1.95 (m, 2H), 0.87 (d,  $J$  = 6.7 Hz, 12H).

$^{13}\text{C NMR}$  ( $\text{CD}_3\text{CN}$ , 101 MHz)  $\delta$  155.1, 154.8, 144.6, 132.4, 121.8 (q,  $J$  = 321.2 Hz), 55.9, 49.7, 26.4, 19.5.

$^{19}\text{F NMR}$  ( $\text{CD}_3\text{CN}$ , 377 MHz)  $\delta$  -79.2.

**HRMS** calcd for  $(\text{C}_{16}\text{H}_{27}\text{N}_3)^{2+}$   $[\text{m}/\text{z}]^+$ : 130.6097, found 137.6098.

(4e)

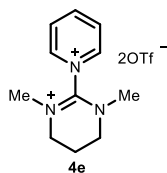

Prepared via **General Procedure I** starting from pyridine (158.2 mg, 2.0 mmol, 1.0 equiv) and 1,3-dimethyltetrahydropyrimidin-2(1*H*)-one (269.0 mg, 2.1 mmol, 1.05 equiv) to give **4e** as a white solid.

$R_f = 0.6$  (eluent: DCM/MeOH = 10:1).

**Yield** 870.4 mg (89%).

**NMR spectroscopy:**

$^1\text{H NMR}$  ( $\text{CD}_3\text{CN}$ , 600 MHz)  $\delta$  9.20 (d,  $J = 6.2$  Hz, 2H), 9.05 (t,  $J = 7.9$  Hz, 1H), 8.51 (t,  $J = 7.1$  Hz, 2H), 3.83 (t,  $J = 5.9$  Hz, 4H), 2.90 (s, 6H), 2.35 (p,  $J = 5.9$  Hz, 2H).

$^{13}\text{C NMR}$  ( $\text{CD}_3\text{CN}$ , 101 MHz)  $\delta$  154.1, 151.1, 144.7, 131.8, 121.7 (q,  $J = 321.2$  Hz), 50.9, 41.6, 18.8.

$^{19}\text{F NMR}$  ( $\text{CD}_3\text{CN}$ , 377 MHz)  $\delta$  -79.2.

**HRMS** calcd for  $(\text{C}_{11}\text{H}_{17}\text{N}_3)^{2+}$   $[m/z]^+$ : 95.5706, found 95.5710.

**(4f) Because 4f is oily, the 4f is not separated and used directly in one-pot**

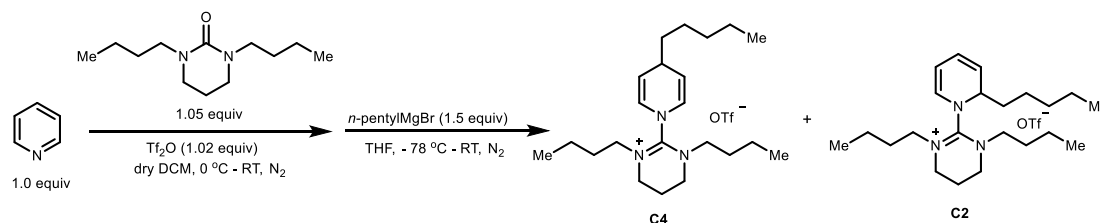

Under a nitrogen atmosphere, 1,3-dibutyltetrahydropyrimidin-2(1*H*)-one (66.8 mg, 0.315 mmol, 1.05 equiv) was added to an oven-dried 25 mL Schlenk tube with a magnetic bar. Anhydrous DCM (3.0 mL) was added and the solution was cooled to 0 °C in an ice-bath.  $\text{TF}_2\text{O}$  (trifluoromethanesulfonic anhydride, 51.4  $\mu\text{L}$ , 0.306 mmol, 1.02 equiv) was added dropwise via a 100  $\mu\text{L}$  micro syringe within 2 minutes and the solution was stirred for 10 minutes at 0 °C (the reaction solution turned pale yellow during this period). Then pyridine (23.7 mg, 0.3 mmol, 1.0 equiv) was added dropwise within 1 minute. The cooling bath was removed, the reaction mixture was stirred vigorously for 16 h. Then the mixture was concentrated under reduced pressure. After three vacuum nitrogen cycles, anhydrous THF (3.0 mL) was added and the solution was cooled to -78 °C in a low-temperature reactor. A solution of the *n*-pentylMgBr (0.45 mmol, 1.5 equiv) was added dropwise via a 1.0 mL syringe within 2 minutes and the resulting suspension was stirred for 10 minutes. Water (3.0 mL) was added in one portion and the reaction mixture stirred for 5 minutes at room temperature, then DCM (5.0 mL) and 1,3,5-trimethoxybenzene (5.3 mg) were added in one portion. The mixture was extracted with DCM (3  $\times$  5.0 mL) and the combined organic layers were washed with brine, dried over anhydrous  $\text{Na}_2\text{SO}_4$ , filtered, and concentrated under reduced pressure. The oil residue was dissolved by  $\text{CDCl}_3$  and the selectivity of the reaction was

determined by crude NMR spectroscopy.

**R<sub>f</sub>** = 0.4 (eluent: DCM/MeOH = 10:1).

**Yield** (NMR yield: 75%, C4/C2 = 12.6/1).

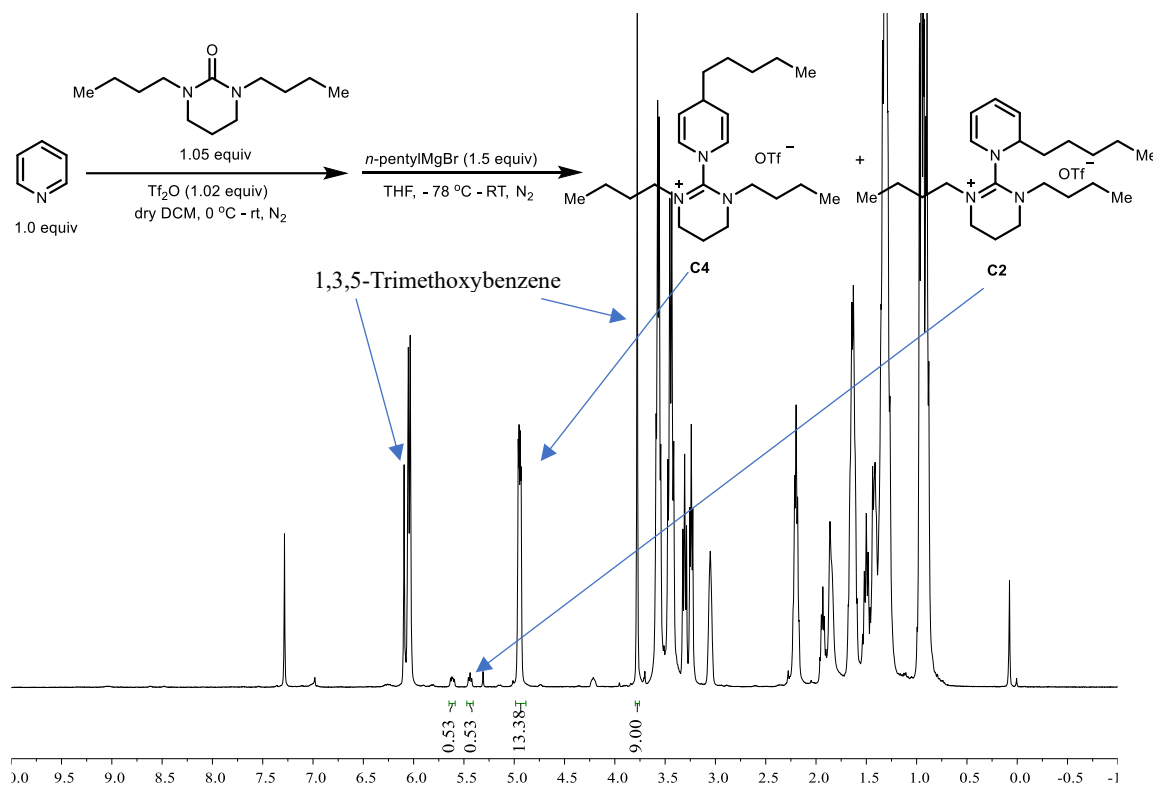

**Figure S1.** Crude <sup>1</sup>H NMR of **4f** (CDCl<sub>3</sub>, 400 MHz)

**(4g) Because 4g is oily, 4g is not separated and is used directly in one-pot**

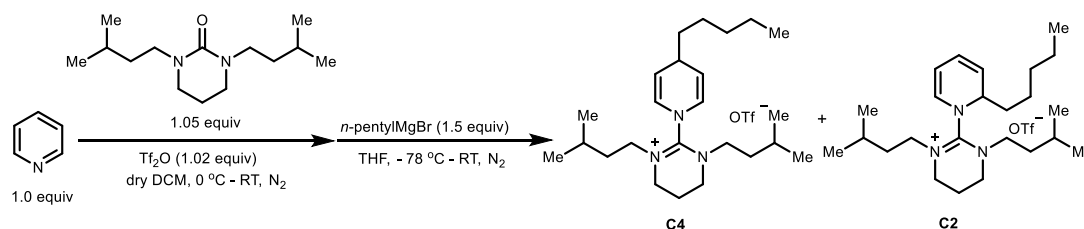

Under a nitrogen atmosphere, 1,3-diisopentyltetrahydropyrimidin-2(1*H*)-one (75.6 mg, 0.315 mmol, 1.05 equiv) was added to an oven-dried 25 mL Schlenk tube with a magnetic bar. Anhydrous DCM (3.0 mL) was added and the solution was cooled to 0 °C in an ice-bath. Tf<sub>2</sub>O (trifluoromethanesulfonyl anhydride, 51.4 μL, 0.306 mmol, 1.02 equiv) was added dropwise via a 250 μL micro syringe within 2 minutes and the solution was stirred for 10 minutes at 0 °C (the reaction solution turned pale yellow during this period). Then pyridine (23.7 mg, 0.3 mmol, 1.0 equiv) was added dropwise within 1 minute. The cooling bath was removed and the reaction was stirred vigorously for 16 h. Then the mixture was concentrated under reduced pressure. After three vacuum nitrogen cycle operations, anhydrous THF (3.0 mL) was added and the solution was cooled to -78 °C in a low-temperature reactor. A solution of the *n*-pentylMgBr (0.45

mmol, 1.5 equiv) was added dropwise via a 1.0 mL syringe within 2 minutes and the resulting suspension was stirred for 10 minutes. Water (3.0 mL) was added in one portion and the reaction mixture stirred for 5 minutes at room temperature, then DCM (5.0 mL) and 1,3,5-trimethoxybenzene (5.3 mg) were added in one portion. The mixture was extracted with DCM (3 × 5.0 mL) and the combined organic layers were washed with brine, dried over anhydrous Na<sub>2</sub>SO<sub>4</sub>, filtered, and concentrated under reduced pressure. The oil residue was dissolved by CDCl<sub>3</sub> and the selectivity of the reaction was determined by crude NMR spectroscopy.

**R<sub>f</sub>** = 0.4 (eluent: DCM/MeOH = 10:1).

**Yield** (NMR yield: 74%, C4/C2 = 6.0/1).

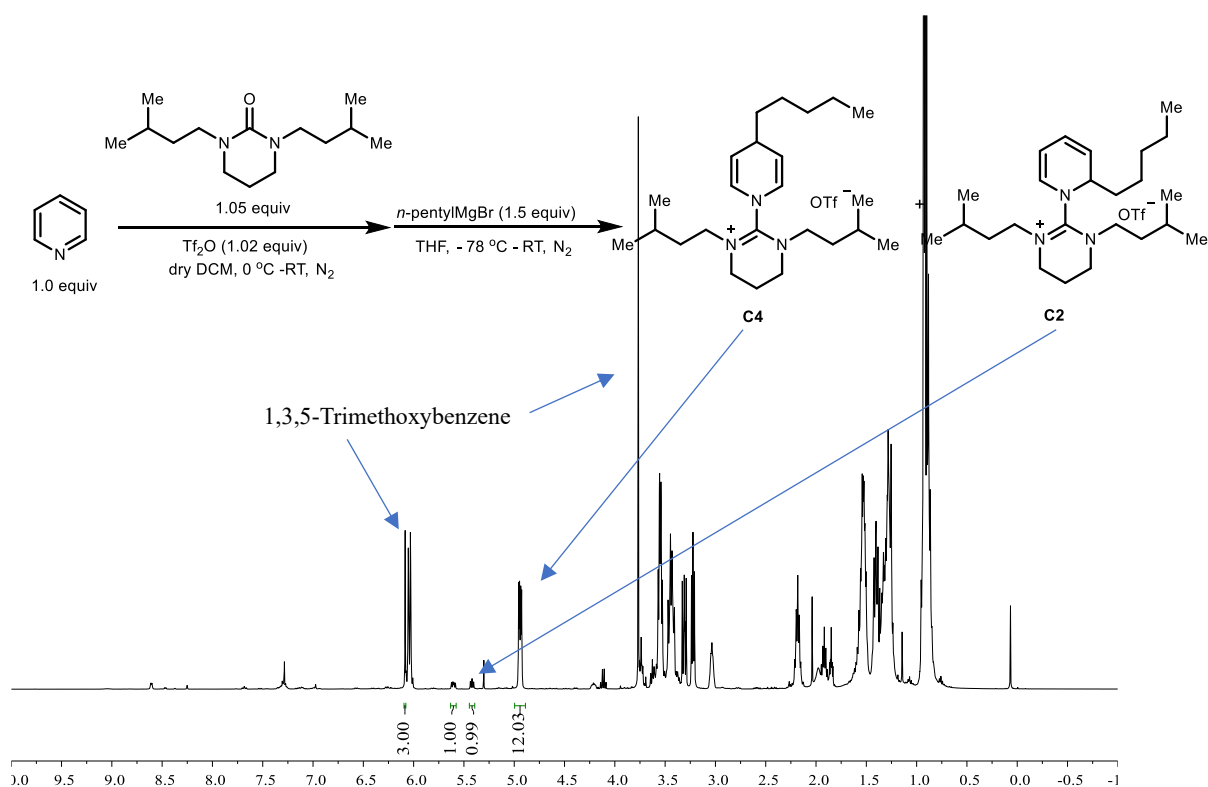

**Figure S2.** Crude <sup>1</sup>H NMR of **4g** (CDCl<sub>3</sub>, 400 MHz)

**(4h)**

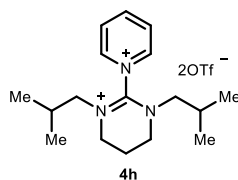

Prepared via **General Procedure I** starting from pyridine (158.2 mg, 2.0 mmol, 1.0 equiv) and 1,3-diisobutyltetrahydropyrimidin-2(1*H*)-one (445.2 mg, 2.1 mmol, 1.05 equiv) to give **4h** as a white solid.

**R<sub>f</sub>** = 0.6 (eluent: DCM/MeOH = 10:1).

**Yield** 985.6 mg (86%).

**NMR spectroscopy:**

**<sup>1</sup>H NMR** (CD<sub>3</sub>CN, 400 MHz) δ 9.25 (d, *J* = 5.7 Hz, 2H), 9.11 (t, *J* = 8.0 Hz, 1H), 8.67 – 8.53 (m, 2H), 3.90 (t, *J* = 5.8 Hz, 4H), 2.89 (d, *J* = 7.6 Hz, 4H), 2.39 (p, *J* = 5.9 Hz, 2H), 2.13 – 1.83 (m, 2H), 0.82 (d, *J* = 6.7 Hz, 12H).

**<sup>13</sup>C NMR** (CD<sub>3</sub>CN, 101 MHz) δ 154.7, 151.1, 144.8, 132.1, 121.7 (q, *J* = 321.2 Hz), 61.6, 49.1, 26.9, 19.5, 18.6.

**<sup>19</sup>F NMR** (CD<sub>3</sub>CN, 565 MHz) δ -79.1.

**HRMS** calcd for (C<sub>17</sub>H<sub>29</sub>N<sub>3</sub>)<sup>2+</sup> [*m/z*]<sup>+</sup>: 137.6178, found 137.6175.

**(S-4i)**

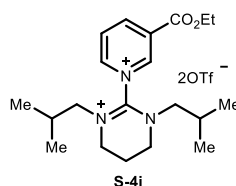

Prepared via **General Procedure I** starting from ethyl nicotinate (302.0 mg, 2.0 mmol, 1.0 equiv), 1,3-diisobutyltetrahydropyrimidin-2(1*H*)-one (445.2 mg, 2.1 mmol, 1.05 equiv) and stirred at 50 °C for 48 h to give **S-4i** as a white solid.

**R<sub>f</sub>** = 0.5 (eluent: DCM/MeOH = 10:1).

**Yield** 1.07 g (83%).

**NMR spectroscopy:**

**<sup>1</sup>H NMR** (CD<sub>3</sub>CN, 400 MHz) δ 9.77 (s, 1H), 9.46 (d, *J* = 8.2 Hz, 1H), 9.41 – 9.35 (m, 1H), 8.69 (dd, *J* = 8.1, 6.3 Hz, 1H), 4.52 (q, *J* = 7.1 Hz, 2H), 3.89 (t, *J* = 5.8 Hz, 4H), 2.95 – 2.83 (m, 4H), 2.38 (p, *J* = 5.9 Hz, 2H), 2.06 – 1.95 (m, 2H), 1.42 (t, *J* = 7.1 Hz, 3H), 0.81 (dd, *J* = 9.8, 6.7 Hz, 12H).

**<sup>13</sup>C NMR** (CD<sub>3</sub>CN, 101 MHz) δ 160.9, 154.1, 150.8, 147.3, 145.8, 134.9, 132.8, 121.8 (q, *J* = 322.2 Hz), 64.7, 61.7, 49.2, 26.9, 19.5, 19.4, 18.6, 14.1.

**<sup>19</sup>F NMR** (CD<sub>3</sub>CN, 377 MHz) δ -79.2.

**HRMS** calcd for (C<sub>20</sub>H<sub>33</sub>N<sub>3</sub>O<sub>2</sub>)<sup>2+</sup> [*m/z*]<sup>+</sup>: 173.6281, found 173.6282.

**(S-4j)**

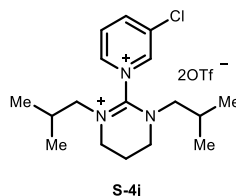

Prepared via **General Procedure I** starting from 3-chloropyridine (226.0 mg, 2.0 mmol, 1.0 equiv), 1,3-diisobutyltetrahydropyrimidin-2(1*H*)-one (445.2 mg, 2.1 mmol, 1.05 equiv) and stirred at room temperature for 48 h to give **S-4j** as a white solid.

**R<sub>f</sub>** = 0.5 (eluent: DCM/MeOH = 10:1).

**Yield** 995.8 mg (82%).

**NMR spectroscopy:**

**<sup>1</sup>H NMR** (DMSO-*d*<sub>6</sub>, 400 MHz) δ 9.92 (s, 1H), 9.55 (d, *J* = 6.0 Hz, 1H), 9.36 (d, *J* = 8.6 Hz, 1H), 8.69 (dd, *J* = 8.5, 6.2 Hz, 1H), 3.88 – 3.71 (m, 4H), 3.05 – 2.81 (m, 4H), 2.34 – 2.16 (m, 2H), 2.01 – 1.87 (m, 2H), 0.78 (t, *J* = 7.1 Hz, 12H).

**<sup>13</sup>C NMR** (DMSO-*d*<sub>6</sub>, 101 MHz) δ 153.2, 149.2, 143.1, 142.8, 137.8, 131.3, 120.7 (q, *J* = 323.2 Hz), 60.0, 48.1, 25.8, 19.19, 19.16, 17.9.

**<sup>19</sup>F NMR** (DMSO-*d*<sub>6</sub>, 377 MHz) δ -78.9.

**HRMS** calcd for (C<sub>17</sub>H<sub>28</sub>ClN<sub>3</sub>)<sup>2+</sup> [*m/z*]<sup>+</sup>: 154.5980, found 154.5978.

**(S-4k)**

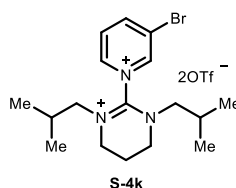

Prepared via **General Procedure I** starting from 3-bromopyridine (314.0 mg, 2.0 mmol, 1.0 equiv), 1,3-diisobutyltetrahydropyrimidin-2(1*H*)-one (445.2 mg, 2.1 mmol, 1.05 equiv) and stirred at room temperature for 48 h to give **S-4k** as a white solid.

**R<sub>f</sub>** = 0.5 (eluent: DCM/MeOH = 10:1).

**Yield** 989.5 mg (76%).

**NMR spectroscopy:**

**<sup>1</sup>H NMR** (DMSO-*d*<sub>6</sub>, 400 MHz) δ 9.96 (s, 1H), 9.56 (d, *J* = 6.0 Hz, 1H), 9.46 (d, *J* = 8.5 Hz, 1H), 8.65 – 8.58 (m, 1H), 3.83 – 3.72 (m, 4H), 2.99 – 2.90 (m, 2H), 2.89 – 2.79 (m, 2H), 2.33 – 2.17 (m, 2H), 2.07 – 1.86 (m, 2H), 0.84 – 0.72 (m, 12H).

**<sup>13</sup>C NMR** (DMSO-*d*<sub>6</sub>, 101 MHz) δ 155.7, 149.1, 144.4, 143.1, 131.2, 125.6, 120.7 (q, *J* = 323.2 Hz), 60.0, 48.0, 25.8, 19.19, 19.16, 17.9.

**<sup>19</sup>F NMR** (DMSO-*d*<sub>6</sub>, 377 MHz) δ -78.9.

**HRMS** calcd for (C<sub>17</sub>H<sub>28</sub>BrN<sub>3</sub>)<sup>2+</sup> [*m/z*]<sup>+</sup>: 176.5728, found 176.5727.

**(S-4l)**

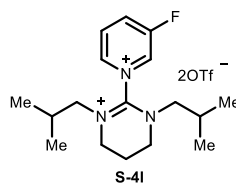

Prepared via **General Procedure I** starting from 3-fluoropyridine (194.0 mg, 2.0 mmol, 1.0 equiv), 1,3-diisobutyltetrahydropyrimidin-2(1*H*)-one (445.2 mg, 2.1 mmol, 1.05 equiv) and stirred at room temperature for 48 h to give **S-4l** as a white solid.

**R<sub>f</sub>** = 0.5 (eluent: DCM/MeOH = 10:1).

**Yield** 874.8 mg (74%).

**NMR spectroscopy:**

**<sup>1</sup>H NMR** (DMSO-*d*<sub>6</sub>, 400 MHz) δ 9.90 (s, 1H), 9.52 (d, *J* = 6.0 Hz, 1H), 9.22 (t, *J* =

7.2 Hz, 1H), 8.81 – 8.71 (m, 1H), 3.88 – 3.75 (m, 4H), 3.03 – 2.82 (m, 4H), 2.31 – 2.14 (m, 2H), 2.03 – 1.84 (m, 2H), 0.77 (dd,  $J = 14.6, 6.6$  Hz, 12H).

$^{13}\text{C}$  NMR (DMSO- $d_6$ , 101 MHz)  $\delta$  161.5 (d,  $J = 259.6$  Hz), 149.2, 141.7 (d,  $J = 3.0$  Hz), 141.4 (d,  $J = 18.2$  Hz), 134.2 (d,  $J = 40.4$  Hz), 132.4 (d,  $J = 8.1$  Hz), 120.7 (q,  $J = 323.2$  Hz), 60.1, 48.1, 25.8, 19.20, 19.15, 17.9.

$^{19}\text{F}$  NMR (DMSO- $d_6$ , 377 MHz)  $\delta$  -78.9, -106.4.

HRMS calcd for  $(\text{C}_{17}\text{H}_{28}\text{FN}_3)^{2+}$  [ $m/z$ ] $^+$ : 146.6128, found 146.6127.

#### (S-4q)

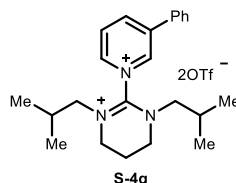

Prepared via **General Procedure I** starting from 3-phenylpyridine (310.1 mg, 2.0 mmol, 1.0 equiv), 1,3-dimethyltetrahydropyrimidin-2(1H)-one (445.2 mg, 2.1 mmol, 1.05 equiv) and stirred at room temperature for 48 h to give **S-4q** as a white solid.

$R_f = 0.5$  (eluent: DCM/MeOH = 10:1).

**Yield** 1.13 g (87%).

#### NMR spectroscopy:

$^1\text{H}$  NMR ( $\text{CD}_3\text{CN}$ , 400 MHz)  $\delta$  9.58 (s, 1H), 9.33 (d,  $J = 8.4$  Hz, 1H), 9.14 (d,  $J = 6.1$  Hz, 1H), 8.61 (dd,  $J = 8.4, 6.1$  Hz, 1H), 7.95 – 7.88 (m, 2H), 7.73 – 7.67 (m, 3H), 3.93 (t,  $J = 5.8$  Hz, 4H), 3.07 – 2.91 (m, 4H), 2.51 – 2.35 (m, 2H), 2.14 – 2.01 (m, 2H), 0.89 – 0.82 (m, 12H).

$^{13}\text{C}$  NMR ( $\text{CD}_3\text{CN}$ , 101 MHz)  $\delta$  151.0, 150.4, 144.0, 141.9, 140.9, 131.6, 131.5, 131.1, 130.0, 127.9, 121.1 (q,  $J = 321.6$  Hz), 61.0, 48.3, 26.2, 18.74, 18.72, 17.9.

$^{19}\text{F}$  NMR ( $\text{CD}_3\text{CN}$ , 565 MHz)  $\delta$  -79.2.

HRMS calcd for  $(\text{C}_{20}\text{H}_{33}\text{N}_3\text{O}_2)^{2+}$  [ $m/z$ ] $^+$ : 175.6332, found 175.6327.

#### (S-4s)

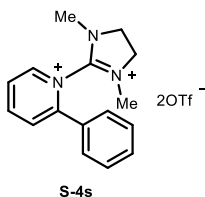

Prepared via **General Procedure I** starting from 2-phenylpyridine (310.1 mg, 2.0 mmol, 1.0 equiv), 1,3-dimethylimidazolium-2-one (239.4 mg, 2.1 mmol, 1.05 equiv) and stirred at room temperature for 48 h to give **S-4s** as a white solid.

$R_f = 0.4$  (eluent: DCM/MeOH = 10:1).

**Yield** 896.5 mg (81%).

#### NMR spectroscopy:

$^1\text{H}$  NMR ( $\text{CD}_3\text{CN}$ , 400 MHz)  $\delta$  9.16 (d,  $J = 6.0$  Hz, 1H), 9.08 (t,  $J = 8.0$  Hz, 1H), 8.53

(d,  $J = 8.2$  Hz, 1H), 8.47 (t,  $J = 7.0$  Hz, 1H), 7.86 (t,  $J = 7.4$  Hz, 1H), 7.77 (t,  $J = 7.5$  Hz, 2H), 7.65 (d,  $J = 7.6$  Hz, 2H), 4.20 – 4.07 (m, 2H), 4.05 – 3.90 (m, 2H), 2.91 (s, 6H).

$^{13}\text{C}$  NMR (CD<sub>3</sub>CN, 101 MHz)  $\delta$  155.6, 153.8, 153.1, 144.5, 134.0, 132.6, 130.5, 129.0, 128.8, 128.3, 121.0 (q,  $J = 321.2$  Hz), 50.3, 34.3.

$^{19}\text{F}$  NMR (CD<sub>3</sub>CN, 565 MHz)  $\delta$  -79.2.

HRMS calcd for (C<sub>16</sub>H<sub>19</sub>N<sub>3</sub>)<sup>2+</sup> [m/z]<sup>+</sup>: 126.5784, found 126.5785.

#### (S-4t)

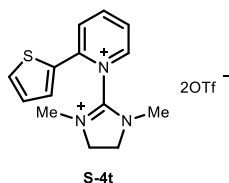

Prepared via **General Procedure I** starting from 2-(thiophen-2-yl)pyridine (322.0 mg, 2.0 mmol, 1.0 equiv), 1,3-dimethylimidazolidin-2-one (239.4 mg, 2.1 mmol, 1.05 equiv) and stirred at room temperature for 48 h to give **S-4t** as a yellow solid.

$R_f = 0.4$  (eluent: DCM/MeOH = 10:1).

**Yield** 627.1 mg (56%).

#### NMR spectroscopy:

$^1\text{H}$  NMR (CD<sub>3</sub>CN, 600 MHz)  $\delta$  8.97 (d,  $J = 6.4$  Hz, 1H), 8.93 (t,  $J = 8.1$  Hz, 1H), 8.58 (d,  $J = 8.4$  Hz, 1H), 8.32 (t,  $J = 6.5$  Hz, 1H), 8.22 (d,  $J = 5.0$  Hz, 1H), 7.90 (d,  $J = 3.9$  Hz, 1H), 7.53 – 7.39 (m, 1H), 4.33 – 4.23 (m, 2H), 4.23 – 4.15 (m, 2H), 2.94 (s, 6H).

$^{13}\text{C}$  NMR (CD<sub>3</sub>CN, 151 MHz)  $\delta$  154.0, 153.5, 150.3, 144.6, 139.0, 137.2, 132.7, 131.7, 128.91, 128.86, 122.0 (q,  $J = 320.1$  Hz), 51.3, 35.0.

$^{19}\text{F}$  NMR (CD<sub>3</sub>CN, 565 MHz)  $\delta$  -79.2.

HRMS calcd for (C<sub>14</sub>H<sub>17</sub>N<sub>3</sub>S)<sup>2+</sup> [m/z]<sup>+</sup>: 129.5566, found 129.5567.

#### (S-4u)

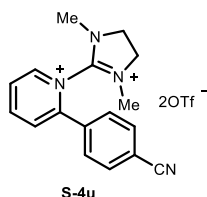

Prepared via **General Procedure I** starting from 4-(pyridin-2-yl)benzonitrile (360.1 mg, 2.0 mmol, 1.0 equiv), 1,3-dimethylimidazolidin-2-one (239.4 mg, 2.1 mmol, 1.05 equiv) and stirred at 50 °C for 36 h to give **S-4u** as a white solid.

$R_f = 0.4$  (eluent: DCM/MeOH = 10:1).

**Yield** 780.0 mg (68%).

#### NMR spectroscopy:

$^1\text{H}$  NMR (CD<sub>3</sub>CN, 400 MHz)  $\delta$  9.22 (d,  $J = 6.2$  Hz, 1H), 9.13 (t,  $J = 8.0$  Hz, 1H), 8.77 – 8.49 (m, 2H), 8.10 (d,  $J = 8.3$  Hz, 2H), 7.79 (d,  $J = 8.3$  Hz, 2H), 4.20 – 4.08 (m, 2H),



4.02 – 3.94 (m, 2H), 2.92 (s, 6H).

$^{13}\text{C}$  NMR ( $\text{CD}_3\text{CN}$ , 151 MHz)  $\delta$  153.0, 152.6, 150.9, 145.4, 133.5, 133.0, 130.5, 130.2, 129.9, 125.4, 124.6, 120.9 (q,  $J = 320.1$  Hz), 50.4, 34.5.

$^{19}\text{F}$  NMR ( $\text{CD}_3\text{CN}$ , 377 MHz)  $\delta$  -79.2.

HRMS calcd for  $(\text{C}_{17}\text{H}_{18}\text{N}_4)^{2+}$   $[\text{m/z}]^+$ : 139.0760, found 139.0759.

(S-4w)

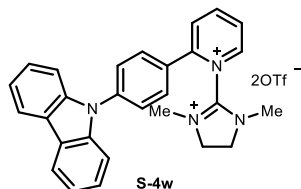

Prepared via **General Procedure I** starting from 9-(4-(pyridin-2-yl)phenyl)-9H-carbazole (640.2 mg, 2.0 mmol, 1.0 equiv), 1,3-dimethylimidazolidin-2-one (239.4 mg, 2.1 mmol, 1.05 equiv) and stirred at room temperature for 48 h to give **S-4w** as an orange solid.

$R_f = 0.4$  (eluent: DCM/MeOH = 10:1).

**Yield** 1190.0 mg (83%).

**NMR spectroscopy:**

$^1\text{H}$  NMR ( $\text{CD}_3\text{CN}$ , 400 MHz)  $\delta$  9.16 (d,  $J = 6.5$  Hz, 1H), 9.11 (d,  $J = 8.0$  Hz, 1H), 8.63 (d,  $J = 8.1$  Hz, 1H), 8.51 (t,  $J = 7.0$  Hz, 1H), 8.24 (d,  $J = 7.7$  Hz, 2H), 8.07 (d,  $J = 8.5$  Hz, 2H), 7.90 (d,  $J = 8.5$  Hz, 2H), 7.67 (d,  $J = 8.3$  Hz, 2H), 7.53 (t,  $J = 7.7$  Hz, 2H), 7.39 (t,  $J = 7.5$  Hz, 2H), 4.30 – 4.18 (m, 2H), 4.18 – 4.08 (m, 2H), 3.01 (s, 6H).

$^{13}\text{C}$  NMR ( $\text{CD}_3\text{CN}$ , 151 MHz)  $\delta$  154.9, 153.7, 153.1, 144.7, 142.9, 139.8, 132.6, 130.8, 129.1, 128.0, 126.6, 126.1, 124.0, 121.3, 121.0 (q,  $J = 320.1$  Hz), 120.6, 110.1, 50.5, 34.2.

$^{19}\text{F}$  NMR ( $\text{CD}_3\text{CN}$ , 565 MHz)  $\delta$  -79.2.

HRMS calcd for  $(\text{C}_{28}\text{H}_{26}\text{N}_4)^{2+}$   $[\text{m/z}]^+$ : 209.1073, found 209.1071.

(S-4aa)

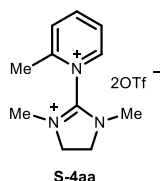

Prepared via **General Procedure I** starting from 2-methylpyridine (186.1 mg, 2.0 mmol, 1.0 equiv), 1,3-dimethylimidazolidin-2-one (239.4 mg, 2.1 mmol, 1.05 equiv) and stirred at 50 °C for 48 h to give **S-4aa** as a brown solid.

$R_f = 0.4$  (eluent: DCM/MeOH = 10:1).

**Yield** 680.6 mg (70%).

**NMR spectroscopy:**

$^1\text{H}$  NMR ( $\text{CD}_3\text{CN}$ , 400 MHz)  $\delta$  9.02 (d,  $J = 6.2$  Hz, 1H), 8.89 (t,  $J = 8.0$  Hz, 1H), 8.35

(d,  $J = 8.2$  Hz, 1H), 8.31 (t,  $J = 7.0$  Hz, 1H), 4.44 – 4.34 (m, 2H), 4.32 – 4.23 (m, 2H), 2.95 (s, 6H), 2.89 (s, 3H).

$^{13}\text{C}$  NMR (CD<sub>3</sub>CN, 101 MHz)  $\delta$  157.2, 152.7, 152.5, 143.2, 132.6, 128.2, 121.0 (q,  $J = 321.2$  Hz), 50.7, 33.9, 19.3.

$^{19}\text{F}$  NMR (CD<sub>3</sub>CN, 377 MHz)  $\delta$  -79.2.

HRMS calcd for (C<sub>11</sub>H<sub>17</sub>N<sub>3</sub>)<sup>2+</sup> [ $m/z$ ]<sup>+</sup>: 95.5706, found 95.5710.

### 3. C-4 alkylation and arylation with Grignard reagents as the nucleophile

#### General procedures II:

Under a nitrogen atmosphere, **4h** (171.9 mg, 0.3 mmol, 1.0 equiv) was added to an oven-dried 25 mL Schlenk tube with a magnetic bar at room temperature. Anhydrous THF (3.0 mL) was added and the suspension was cooled to -78 °C in a low-temperature reactor. (Note: If there is no low-temperature reactor in the laboratory, the reaction can also be carried out in an ice bath with a slight decrease in yield). A solution of the Grignard reagents (0.45 mmol, 1.5 equiv) was added dropwise via a 1.0 mL syringe within 2 minutes and the resulting suspension was stirred for 10 minutes to give a clear solution. Water (3.0 mL) was added in one portion and the reaction mixture was stirred for 5 minutes at room temperature, then NaNO<sub>2</sub> aqueous solution (100 mg/mL, 0.83 mL, 4.0 equiv) and acetic acid (103  $\mu\text{L}$ , 6.0 equiv) were added in one portion and the mixture were stirred for 12 hours at room temperature. The mixture was neutralized with a saturated sodium bicarbonate solution (2.0 mL), extracted with EtOAc (3  $\times$  8.0 mL) and the combined organic layers were washed with brine, dried over anhydrous Na<sub>2</sub>SO<sub>4</sub>, filtered, and concentrated under reduced pressure. The residue was purified by column chromatography on silica gel to afford C-4 alkylation or arylation pyridine products.

#### 4-pentylpyridine (**5a**)

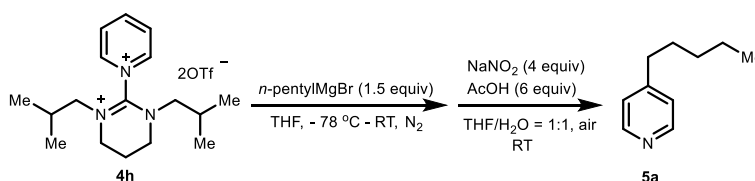

Prepared via **General Procedure II** starting from *n*-pentylMgBr (0.45 mmol, 1.5 equiv) to give 4-pentylpyridine (**5a**) as a pale-yellow oil.

$R_f = 0.4$  (eluent: petroleum ether/EtOAc = 5:1).

**Yield** 35.4 mg (79%).

#### NMR spectroscopy:

$^1\text{H}$  NMR (CDCl<sub>3</sub>, 600 MHz)  $\delta$  8.46 (d,  $J = 5.5$  Hz, 2H), 7.09 (d,  $J = 5.7$  Hz, 2H), 2.61 – 2.56 (m, 2H), 1.62 (p,  $J = 7.6$  Hz, 2H), 1.37 – 1.27 (m, 4H), 0.88 (t,  $J = 7.0$  Hz, 3H).

$^{13}\text{C}$  NMR (CDCl<sub>3</sub>, 151 MHz)  $\delta$  151.8, 149.5, 123.9, 35.2, 31.3, 29.9, 22.4, 13.9.

HRMS calcd for (C<sub>10</sub>H<sub>16</sub>N)<sup>+</sup> [ $M + \text{H}$ ]<sup>+</sup>: 150.1277, found 150.1276.

### 4-cyclohexylpyridine (**5b**)

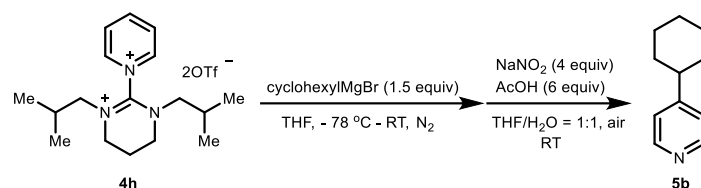

Prepared via **General Procedure II** starting from cyclohexylMgBr (0.45 mmol, 1.5 equiv) to give 4-cyclohexylpyridine (**5b**) as a colorless oil.

R<sub>f</sub> = 0.3 (eluent: petroleum ether/EtOAc = 10:1).

Yield 44.0 mg (91%).

**NMR spectroscopy:**

<sup>1</sup>H NMR (CDCl<sub>3</sub>, 600 MHz) δ 8.45 (d, *J* = 5.9 Hz, 2H), 7.09 (d, *J* = 5.9 Hz, 2H), 2.51 – 2.43 (m, 1H), 1.88 – 1.78 (m, 4H), 1.76 – 1.69 (m, 1H), 1.42 – 1.32 (m, 4H), 1.26 – 1.18 (m, 1H).

<sup>13</sup>C NMR (CDCl<sub>3</sub>, 151 MHz) δ 156.6, 149.6, 122.3, 43.8, 33.5, 26.5, 25.9.

HRMS calcd for (C<sub>11</sub>H<sub>16</sub>N)<sup>+</sup> [M + H]<sup>+</sup>: 162.1277, found 162.1276.

### 4-isopropylpyridine (**5c**)

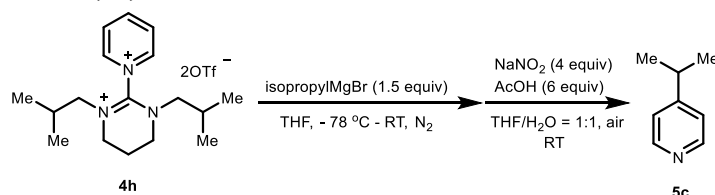

Prepared via **General Procedure II** starting from isopropylMgBr (0.45 mmol, 1.5 equiv) and 1,3,5-trimethoxybenzene (5.3 mg) as an internal standard to give 4-isopropylpyridine (**5c**) as a colorless oil. (Due to that the product is volatile, the yield of this substrate was determined by crude NMR)

R<sub>f</sub> = 0.3 (eluent: petroleum ether/EtOAc = 10:1).

NMR yield: (72%).

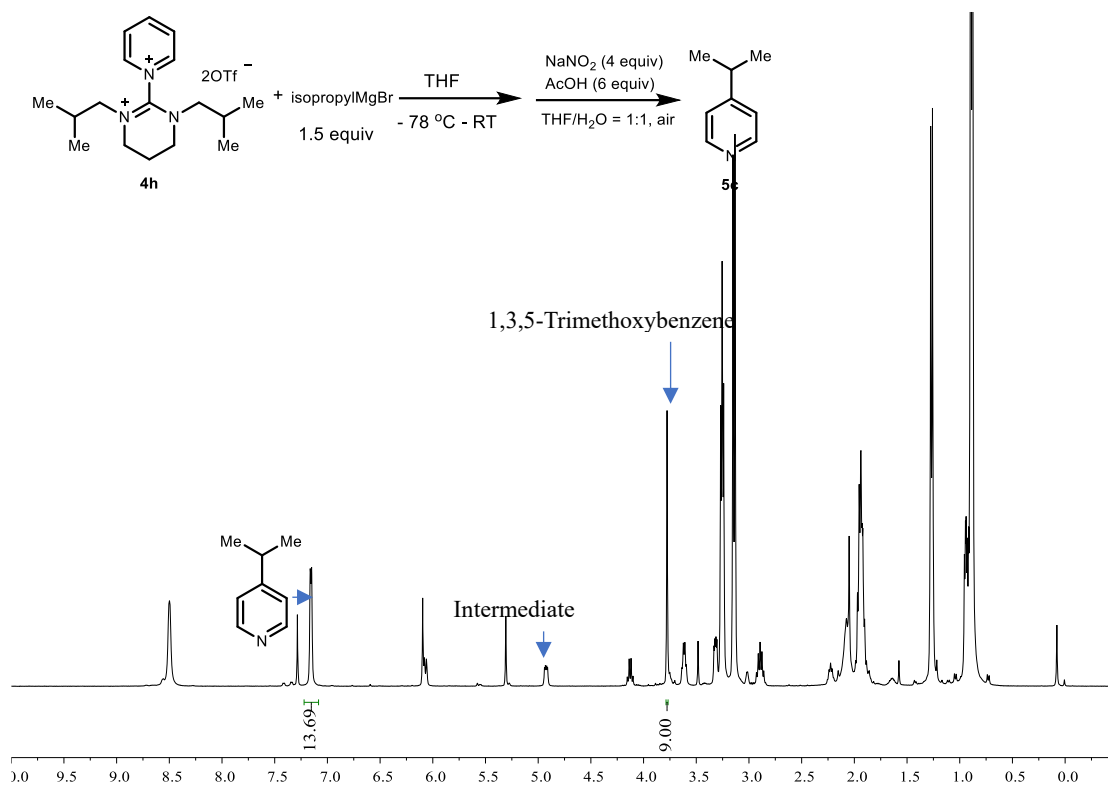

Figure S3. Crude  $^1\text{H}$  NMR of **5c** ( $\text{CDCl}_3$ , 400 MHz)

#### 4-(*tert*-butyl)pyridine (**5d**)

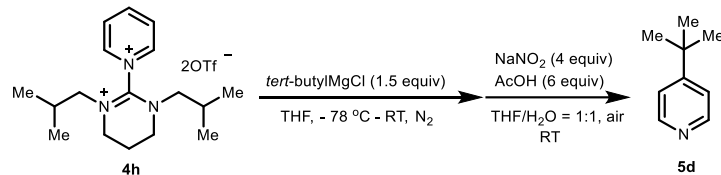

Prepared via **General Procedure II** starting from *tert*-butylMgCl (0.45 mmol, 1.5 equiv) to give 4-(*tert*-butyl)pyridine (**5d**) as a colorless oil. (Note: the solvent concentration was carried out at room temperature)

$R_f$  = 0.5 (eluent: petroleum ether/EtOAc = 5:1).

**Yield** 18.2 mg (45%).

#### NMR spectroscopy:

$^1\text{H}$  NMR ( $\text{CDCl}_3$ , 400 MHz)  $\delta$  8.41 (d,  $J$  = 6.0 Hz, 2H), 7.17 (d,  $J$  = 6.1 Hz, 2H), 1.21 (s, 9H).

$^{13}\text{C}$  NMR ( $\text{CDCl}_3$ , 101 MHz)  $\delta$  159.8, 149.6, 120.6, 34.5, 30.4.

HRMS calcd for  $(\text{C}_9\text{H}_{14}\text{N})^+$   $[\text{M} + \text{H}]^+$ : 136.1121, found 136.1120.

#### 4-(but-3-en-1-yl)pyridine (**5e**)

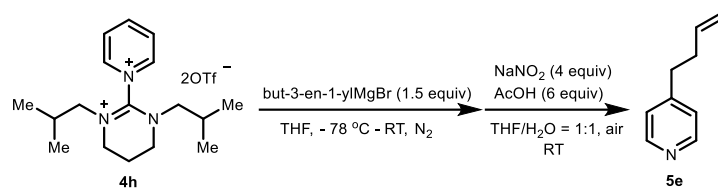

Prepared via **General Procedure II** starting from but-3-en-1-ylMgBr (0.45 mmol, 1.5 equiv) to give 4-(but-3-en-1-yl)pyridine (**5e**) as a yellow oil.

$R_f$  = 0.4 (eluent: petroleum ether/EtOAc = 5:1).

**Yield** 23.1 mg (58%).

**NMR spectroscopy:**

$^1\text{H NMR}$  ( $\text{CDCl}_3$ , 600 MHz)  $\delta$  8.47 (d,  $J$  = 4.9 Hz, 2H), 7.10 (d,  $J$  = 5.1 Hz, 2H), 5.84 – 5.75 (m, 1H), 5.02 (d,  $J$  = 17.1 Hz, 1H), 4.99 (d,  $J$  = 10.2 Hz, 1H), 2.69 (t,  $J$  = 7.7 Hz, 2H), 2.37 (q,  $J$  = 7.2 Hz, 2H).

$^{13}\text{C NMR}$  ( $\text{CDCl}_3$ , 151 MHz)  $\delta$  150.7, 149.6, 137.0, 123.9, 115.7, 34.5, 34.1.

**HRMS** calcd for  $(\text{C}_9\text{H}_{12}\text{N})^+$  [ $\text{M} + \text{H}$ ] $^+$ : 134.0964, found 134.0965.

**4-methylpyridine (5f)**

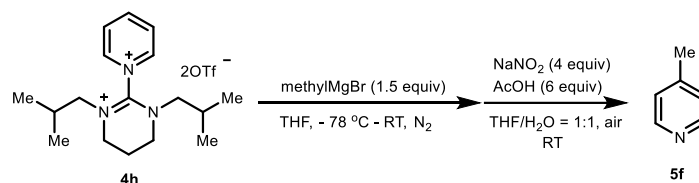

Prepared via **General Procedure II** starting from methylMgBr (0.45 mmol, 1.5 equiv) and 1,3,5-trimethoxybenzene (5.3 mg) as internal standard to give 4-methylpyridine (**5f**) as a colourless oil. (Due to that the product is volatile, the yield of this substrate was determined by crude NMR)

$R_f$  = 0.5 (eluent: petroleum ether/EtOAc = 10:1).

**NMR yield:** (64%).

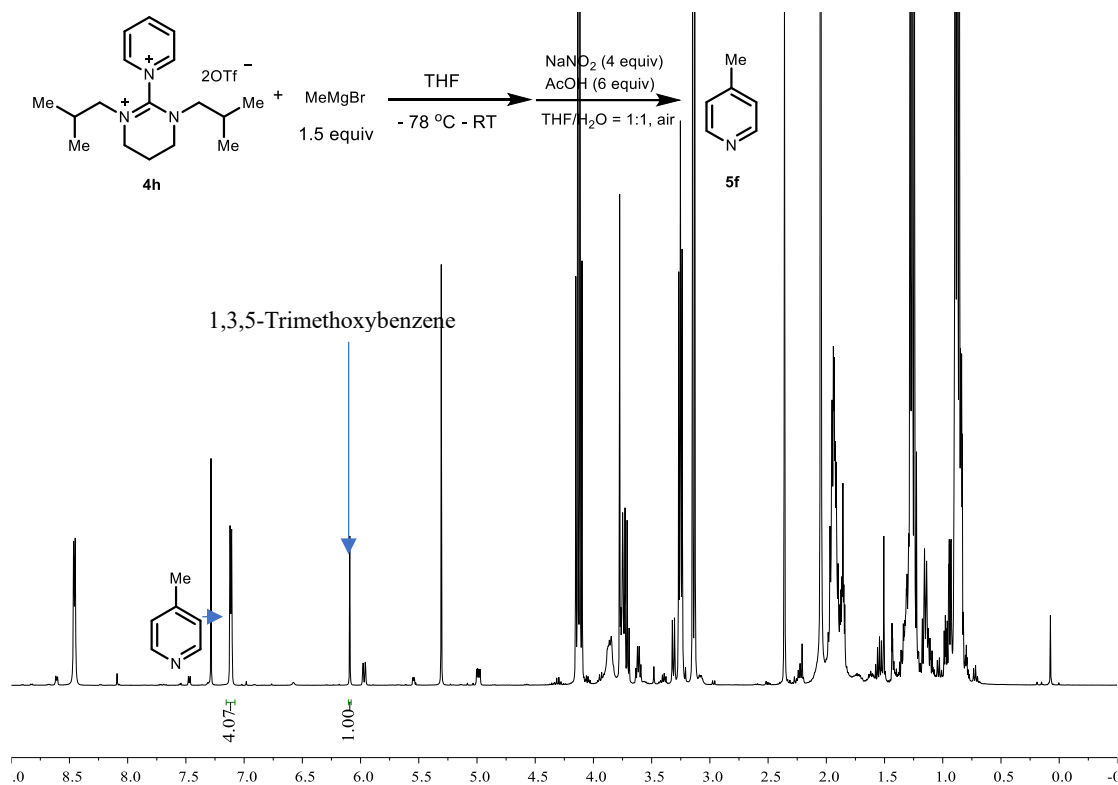

Figure S4. Crude  $^1\text{H}$  NMR of **5f** ( $\text{CDCl}_3$ , 400 MHz)

#### 4-phenylpyridine (**5g**)

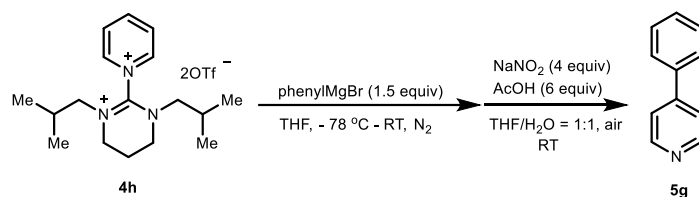

Prepared via **General Procedure II** starting from phenylMgBr (0.45 mmol, 1.5 equiv) to give 4-phenylpyridine (**5g**) as a white solid.

$R_f$  = 0.3 (eluent: petroleum ether/EtOAc = 5:1).

**Yield** 37.0 mg (80%).

**NMR spectroscopy:**

$^1\text{H}$  NMR ( $\text{CDCl}_3$ , 600 MHz)  $\delta$  8.67 – 8.61 (m, 2H), 7.63 – 7.56 (m, 2H), 7.50 – 7.43 (m, 4H), 7.45 – 7.38 (m, 1H).

$^{13}\text{C}$  NMR ( $\text{CDCl}_3$ , 151 MHz)  $\delta$  150.3, 148.3, 138.1, 129.12, 129.07, 127.0, 121.6.

**HRMS** calcd for  $(\text{C}_{11}\text{H}_{10}\text{N})^+$   $[\text{M} + \text{H}]^+$ : 156.0808, found 156.0807.

#### 4-(4-chlorophenyl)pyridine (**5h**)

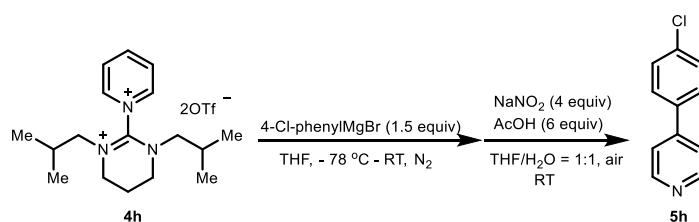

Prepared via **General Procedure II** starting from 4-chlorophenylMgBr (0.45 mmol, 1.5 equiv) to give 4-(4-chlorophenyl)pyridine (**5h**) as a white solid.

$R_f$  = 0.4 (eluent: petroleum ether/EtOAc = 4:1).

**Yield** 34.3 mg (60%).

**NMR spectroscopy:**

$^1\text{H NMR}$  ( $\text{CDCl}_3$ , 600 MHz)  $\delta$  8.65 (d,  $J$  = 5.2 Hz, 2H), 7.55 (d,  $J$  = 8.4 Hz, 2H), 7.47 – 7.42 (m, 4H).

$^{13}\text{C NMR}$  ( $\text{CDCl}_3$ , 151 MHz)  $\delta$  150.3, 147.2, 136.6, 135.4, 129.4, 128.3, 121.4.

**HRMS** calcd for  $\text{C}_{11}\text{H}_9\text{ClN}^+$  [ $\text{M} + \text{H}$ ] $^+$ : 190.0418, found 190.0417.

#### 4-(4-methoxyphenyl)pyridine (**5i**)

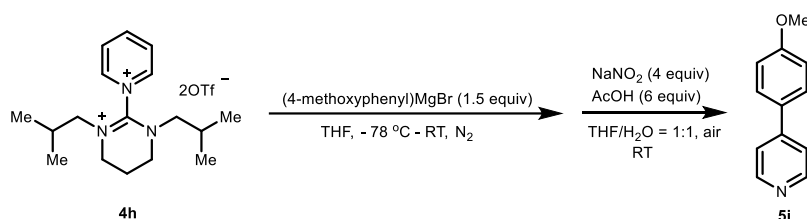

Prepared via **General Procedure II** starting from 4-methoxyphenylMgBr (0.45 mmol, 1.5 equiv) to give 4-(4-methoxyphenyl)pyridine (**5i**) as a white solid.

$R_f$  = 0.4 (eluent: petroleum ether/EtOAc = 2:1).

**Yield** 39.4 mg (71%).

**NMR spectroscopy:**

$^1\text{H NMR}$  ( $\text{CDCl}_3$ , 600 MHz)  $\delta$  8.60 (d,  $J$  = 3.0 Hz, 2H), 7.59 (d,  $J$  = 8.7 Hz, 2H), 7.46 (d,  $J$  = 5.2 Hz, 2H), 7.00 (d,  $J$  = 8.6 Hz, 2H), 3.85 (s, 3H).

$^{13}\text{C NMR}$  ( $\text{CDCl}_3$ , 101 MHz)  $\delta$  160.6, 150.1, 147.9, 130.3, 128.2, 121.1, 114.6, 55.4.

**HRMS** calcd for  $(\text{C}_{12}\text{H}_{12}\text{NO})^+$  [ $\text{M} + \text{H}$ ] $^+$ : 186.0913, found 186.0912.

#### 4-(thiophen-2-yl)pyridine (**5j**)

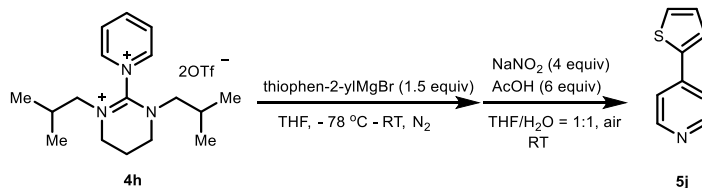

Prepared via **General Procedure II** starting from thiophen-2-ylMgBr (0.45 mmol, 1.5 equiv) to give 4-(thiophen-2-yl)pyridine (**5j**) as a brown solid.

$R_f$  = 0.4 (eluent: petroleum ether/EtOAc = 4:1).

**Yield** 31.1 mg (64%).

**NMR spectroscopy:**

$^1\text{H NMR}$  ( $\text{CDCl}_3$ , 600 MHz)  $\delta$  8.57 (dd,  $J$  = 4.7, 1.4 Hz, 2H), 7.50 – 7.47 (m, 1H), 7.46 (dd,  $J$  = 4.6, 1.6 Hz, 2H), 7.40 (dd,  $J$  = 5.0, 0.9 Hz, 1H), 7.12 (dd,  $J$  = 5.0, 3.7 Hz, 1H).

$^{13}\text{C NMR}$  ( $\text{CDCl}_3$ , 151 MHz)  $\delta$  150.3, 141.4, 141.2, 128.4, 127.2, 125.4, 119.9.

HRMS calcd for (C<sub>9</sub>H<sub>8</sub>NS)<sup>+</sup> [M + H]<sup>+</sup>: 162.0372, found 162.0370.

#### 4.: One-pot C-4 alkylation with Grignard reagents as the nucleophile

##### General procedures III:

Under a nitrogen atmosphere, 1,3-diisobutyltetrahydropyrimidin-2(1*H*)-one (222.6 mg, 1.05 mmol, 1.05 equiv) was added to an oven-dried 25 mL Schlenk tube with a magnetic bar. Anhydrous DCM (6.0 mL) was added and the solution was cooled to 0 °C in an ice-bath. Tf<sub>2</sub>O (trifluoromethanesulfonic anhydride, 0.17 mL, 1.02 mmol, 1.02 equiv) was added dropwise via a 250 μL micro syringe within 2 minutes and the solution was stirred for 10 minutes at 0 °C (the reaction solution turned pale yellow during this period). Then different pyridines (1.0 mmol, 1.0 equiv) were added dropwise within 1 minute. The cooling bath was removed, and the reaction was stirred vigorously 12 ~ 48 h (Note: there are some substrates that we have heated, and the specific conditions have been written under each substrate). Then the mixture was concentrated under reduced pressure. After three vacuum nitrogen cycles, anhydrous THF (8.0 mL) was added and the suspension was cooled to -78 °C in a low-temperature reactor. (Note: If there is no low-temperature reactor in the laboratory, the reaction can also be carried out in an ice bath with a slight decrease in yield). A solution of the *n*-pentyl Grignard reagents (1.5 mmol, 1.5 equiv) was added dropwise via a 1.0 mL syringe within 2 minutes and the resulting suspension was stirred for 20 minutes to give a clear solution (Note: there are some substrates that we have reduced the amount of Grignard reagents, and the specific conditions have been written clearly under each substrate). Water (8.0 mL) was added in one portion and the reaction mixture stirred for 5 minutes at room temperature, then NaNO<sub>2</sub> aqueous solution (100 mg/ mL, 2.76 mL, 4.0 equiv) and acetic acid (346 μL, 6.0 equiv) were added in one portion and the mixture were stirred for 24 hours at different temperature. The mixture was neutralized with a saturated sodium bicarbonate solution (8.0 mL), extracted with EtOAc (3 × 10.0 mL) and the combined organic layers were washed with brine, dried over anhydrous Na<sub>2</sub>SO<sub>4</sub>, filtered, and concentrated under reduced pressure. The residue was purified by column chromatography on silica gel to afford C-4 alkylation pyridine products.

##### 3-methyl-4-pentylpyridine (5k)

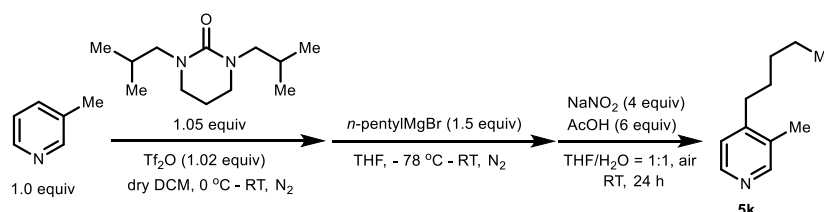

Prepared via **General Procedure III** starting from 3-methylpyridine (93.1 mg, 1.0 mmol, 1.0 equiv) and oxidized at room temperature for 24 h to give 3-methyl-4-pentylpyridine (**5k**) as a pale-yellow oil.

R<sub>f</sub> = 0.5 (eluent: petroleum ether/EtOAc = 7:1).



**Yield** 94.7 mg (58%).

**NMR spectroscopy:**

$^1\text{H}$  NMR ( $\text{CDCl}_3$ , 600 MHz)  $\delta$  8.28 (s, 2H), 6.99 (d,  $J = 5.0$  Hz, 1H), 2.54 – 2.47 (m, 2H), 2.22 (s, 3H), 1.57 – 1.49 (m, 2H), 1.35 – 1.28 (m, 4H), 0.87 (t,  $J = 6.9$  Hz, 3H).

$^{13}\text{C}$  NMR ( $\text{CDCl}_3$ , 151 MHz)  $\delta$  150.5, 149.8, 147.4, 131.5, 123.4, 32.4, 31.7, 28.8, 22.5, 16.0, 13.9.

**HRMS** calcd for  $(\text{C}_{11}\text{H}_{18}\text{N})^+$   $[\text{M} + \text{H}]^+$ : 164.1434, found 164.1433.

**3-chloro-4-pentylpyridine (5l)**

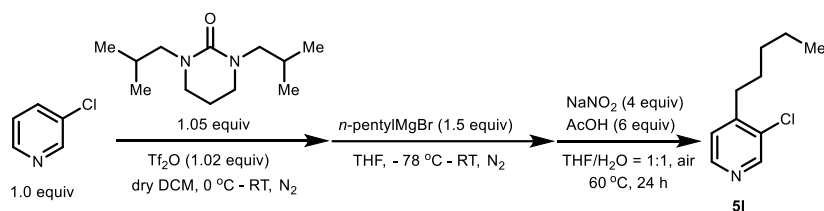

Prepared via **General Procedure III** starting from 3-chloropyridine (113.0 mg, 1.0 mmol, 1.0 equiv) and oxidized at 60 °C for 24 h to give 3-chloro-4-pentylpyridine (**5l**) as a pale-yellow oil.

$R_f = 0.6$  (eluent: petroleum ether/EtOAc = 5:1).

**Yield** 96.8 mg (53%).

**NMR spectroscopy:**

$^1\text{H}$  NMR ( $\text{CDCl}_3$ , 400 MHz)  $\delta$  8.51 (s, 1H), 8.36 (d,  $J = 4.9$  Hz, 1H), 7.14 (d,  $J = 4.9$  Hz, 1H), 2.74 – 2.66 (m, 2H), 1.67 – 1.57 (m, 2H), 1.37 – 1.30 (m, 4H), 0.91 (t,  $J = 6.9$  Hz, 3H).

$^{13}\text{C}$  NMR ( $\text{CDCl}_3$ , 101 MHz)  $\delta$  149.3, 149.2, 147.5, 132.1, 124.8, 32.8, 31.4, 28.4, 22.4, 14.0.

**HRMS** calcd for  $(\text{C}_{10}\text{H}_{15}\text{ClN})^+$   $[\text{M} + \text{H}]^+$ : 184.0888, found 184.0889.

**3,5-dimethyl-4-pentylpyridine (5m)**

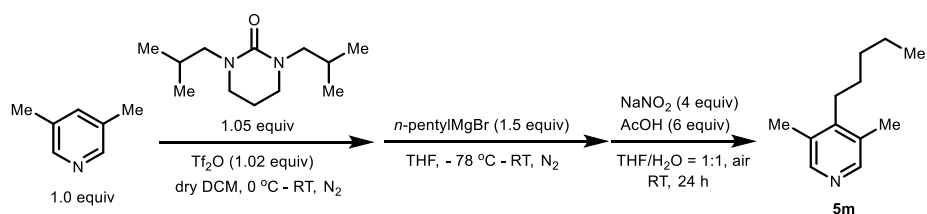

Prepared via **General Procedure III** starting from 3,5-dimethylpyridine (115.1 mg, 1.0 mmol, 1.0 equiv) and oxidized at room temperature for 24 h to give 3,5-dimethyl-4-pentylpyridine (**5m**) as a pale-yellow oil.

$R_f = 0.3$  (eluent: petroleum ether/EtOAc = 5:1).

**Yield** 122.3 mg (69%).

**NMR spectroscopy:**

$^1\text{H}$  NMR ( $\text{CDCl}_3$ , 600 MHz)  $\delta$  8.12 (s, 2H), 2.55 – 2.49 (m, 2H), 2.20 (s, 6H), 1.43 –

1.29 (m, 6H), 0.86 (t,  $J = 7.1$  Hz, 3H).

$^{13}\text{C}$  NMR ( $\text{CDCl}_3$ , 151 MHz)  $\delta$  148.7, 148.3, 130.8, 32.2, 29.2, 28.0, 22.4, 16.2, 14.0.

HRMS calcd for  $(\text{C}_{12}\text{H}_{20}\text{N})^+$   $[\text{M} + \text{H}]^+$ : 178.1590, found 178.1589.

### 3-bromo-4-pentylpyridine (5n)

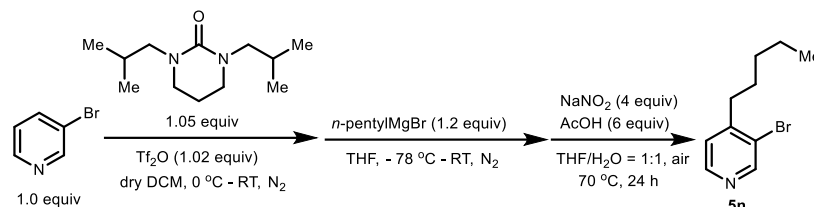

Prepared via **General Procedure III** starting from 3-bromopyridine (157.0 mg, 1.0 mmol, 1.0 equiv),  $n$ -pentyl Grignard reagents (1.2 mmol, 1.2 equiv) and oxidized at 70 °C for 24 h to give 3-bromo-4-pentylpyridine (**5n**) as a pale-yellow oil.

$R_f = 0.6$  (eluent: petroleum ether/EtOAc = 10:1).

**Yield** 115.9 mg (51%).

#### NMR spectroscopy:

$^1\text{H}$  NMR ( $\text{CDCl}_3$ , 400 MHz)  $\delta$  8.64 (s, 1H), 8.39 (d,  $J = 4.9$  Hz, 1H), 7.15 (d,  $J = 4.9$  Hz, 1H), 2.75 – 2.67 (m, 2H), 1.66 – 1.56 (m, 2H), 1.42 – 1.31 (m, 4H), 0.91 (t,  $J = 7.0$  Hz, 3H).

$^{13}\text{C}$  NMR ( $\text{CDCl}_3$ , 101 MHz)  $\delta$  151.7, 151.1, 148.0, 125.1, 123.2, 35.4, 31.4, 28.6, 22.4, 14.0.

HRMS calcd for  $(\text{C}_{10}\text{H}_{15}\text{BrN})^+$   $[\text{M} + \text{H}]^+$ : 228.0382, found 228.0381.

### ethyl 4-pentylnicotinate (5o)

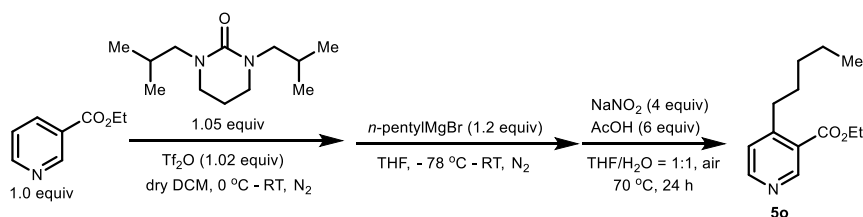

Prepared via **General Procedure III** starting from ethyl nicotinate (151.0 mg, 1.0 mmol, 1.0 equiv),  $n$ -pentyl Grignard reagents (1.2 mmol, 1.2 equiv) and oxidized at 70 °C for 24 h to give ethyl 4-pentylnicotinate (**5o**) as a pale-yellow oil.

$R_f = 0.6$  (eluent: petroleum ether/EtOAc = 5:1).

**Yield** 127.1 mg (57%).

#### NMR spectroscopy:

$^1\text{H}$  NMR ( $\text{CDCl}_3$ , 400 MHz)  $\delta$  8.97 (s, 1H), 8.50 (d,  $J = 5.0$  Hz, 1H), 7.12 (d,  $J = 5.0$  Hz, 1H), 4.34 (q,  $J = 7.1$  Hz, 2H), 2.95 – 2.86 (m, 2H), 1.61 – 1.48 (m, 2H), 1.35 (t,  $J = 7.1$  Hz, 3H), 1.31 – 1.24 (m, 4H), 0.87 – 0.81 (m, 3H).

$^{13}\text{C}$  NMR ( $\text{CDCl}_3$ , 101 MHz)  $\delta$  166.1, 153.5, 151.9, 151.5, 125.9, 125.3, 61.1, 33.7, 31.7, 30.4, 22.4, 14.2, 13.9.

HRMS calcd for  $(C_{13}H_{20}NO_2)^+ [M + H]^+$ : 222.1489, found 222.1487.

#### 4'-pentyl-2,3'-bipyridine (**5p**)

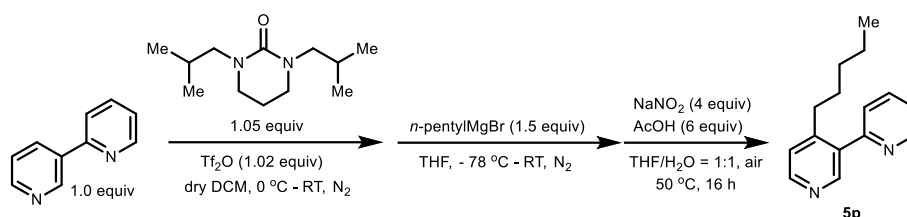

Prepared via **General Procedure III** starting from 2,3'-bipyridine (156.0 mg, 1.0 mmol, 1.0 equiv) and oxidized at 50 °C for 16 h to give 4'-pentyl-2,3'-bipyridine (**5p**) as a yellow oil.

$R_f$  = 0.4 (eluent: petroleum ether/EtOAc = 1:1).

Yield 120.2 mg (53%).

#### NMR spectroscopy:

$^1H$  NMR ( $CDCl_3$ , 400 MHz)  $\delta$  8.72 (d,  $J$  = 4.8 Hz, 1H), 8.54 (s, 1H), 8.52 (d,  $J$  = 5.1 Hz, 1H), 7.80 (td,  $J$  = 7.7, 1.8 Hz, 1H), 7.40 (d,  $J$  = 7.8 Hz, 1H), 7.31 (ddd,  $J$  = 7.5, 4.9, 0.9 Hz, 1H), 7.24 (d,  $J$  = 5.1 Hz, 1H), 2.78 – 2.70 (m, 2H), 1.48 (p,  $J$  = 7.3 Hz, 2H), 1.24 – 1.15 (m, 4H), 0.80 (t,  $J$  = 6.8 Hz, 3H).

$^{13}C$  NMR ( $CDCl_3$ , 101 MHz)  $\delta$  156.9, 150.4, 149.8, 149.5, 148.9, 136.6, 136.2, 124.5, 124.2, 122.4, 32.3, 31.5, 29.8, 22.2, 13.9.

HRMS calcd for  $(C_{15}H_{19}N_2)^+ [M + H]^+$ : 227.1543, found 227.1541.

#### 4-pentyl-3-phenylpyridine (**5q**)

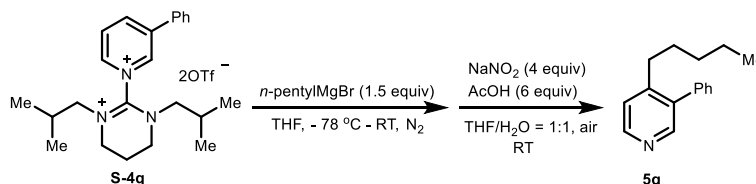

Prepared via **General Procedure II** starting from **S-4q** (194.7 mg, 0.3 mmol, 1.0 equiv) and *n*-pentylMgBr (0.45 mmol, 1.5 equiv) to give 4-pentyl-3-phenylpyridine (**5q**) as a pale-yellow oil.

$R_f$  = 0.3 (eluent: petroleum ether/EtOAc = 10:1).

Yield 51.2 mg (76%).

#### NMR spectroscopy:

$^1H$  NMR ( $CDCl_3$ , 600 MHz)  $\delta$  8.47 (d,  $J$  = 5.1 Hz, 1H), 8.41 (s, 1H), 7.43 (t,  $J$  = 7.4 Hz, 2H), 7.38 (t,  $J$  = 7.3 Hz, 1H), 7.29 (d,  $J$  = 7.3 Hz, 2H), 7.20 (d,  $J$  = 5.1 Hz, 1H), 2.68 – 2.43 (m, 2H), 1.48 (p,  $J$  = 7.4 Hz, 2H), 1.28 – 1.09 (m, 4H), 0.80 (t,  $J$  = 6.8 Hz, 3H).

$^{13}C$  NMR ( $CDCl_3$ , 151 MHz)  $\delta$  150.2, 149.2, 148.4, 138.0, 137.6, 129.4, 128.4, 127.6, 123.9, 32.3, 31.5, 29.9, 22.3, 13.9.

HRMS calcd for  $(C_{16}H_{20}N)^+ [M + H]^+$ : 226.1590, found 226.1589.

### *N,N*-diethyl-4-pentylnicotinamide (**5r**)

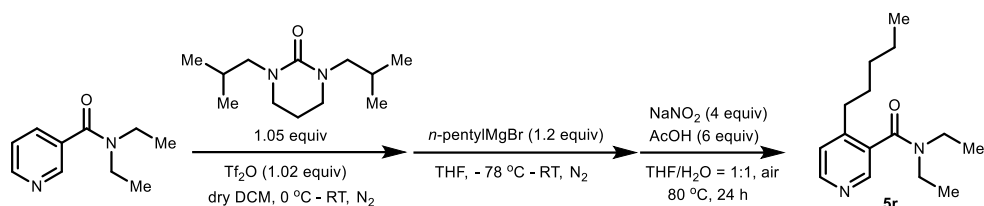

Prepared via **General Procedure III** starting from *N,N*-diethylnicotinamide (178.1 mg, 1.0 mmol, 1.0 equiv), *n*-pentyl Grignard reagents (1.2 mmol, 1.2 equiv) and oxidized at 80 °C for 24 h to give *N,N*-diethyl-4-pentylnicotinamide (**5r**) as a pale yellow oil.

R<sub>f</sub> = 0.2 (eluent: petroleum ether/EtOAc = 2:1).

Yield 71.2 mg (29%, 65.0 mg starting material, 45% b.r.s.m).

#### NMR spectroscopy:

<sup>1</sup>H NMR (CDCl<sub>3</sub>, 400 MHz) δ 8.48 (d, *J* = 5.1 Hz, 1H), 8.37 (s, 1H), 7.18 (d, *J* = 5.1 Hz, 1H), 3.96 – 3.22 (br, 2H), 3.11 (q, *J* = 7.1 Hz, 2H), 2.57 (t, *J* = 4.0 Hz, 2H), 1.72 – 1.48 (br, 2H), 1.33 – 1.28 (m, 4H), 1.24 (t, *J* = 7.1 Hz, 3H), 1.06 (t, *J* = 7.1 Hz, 3H), 0.86 (t, *J* = 6.8 Hz, 3H).

<sup>13</sup>C NMR (CDCl<sub>3</sub>, 101 MHz) δ 168.1, 149.5, 148.8, 146.1, 133.0, 124.3, 43.0, 38.9, 32.5, 31.7, 29.5, 22.4, 14.1, 13.9, 12.7.

HRMS calcd for (C<sub>15</sub>H<sub>25</sub>N<sub>2</sub>O)<sup>+</sup> [M + H]<sup>+</sup>: 249.1962, found 249.1959.

### 4-pentyl-2-phenylpyridine (**5s**)

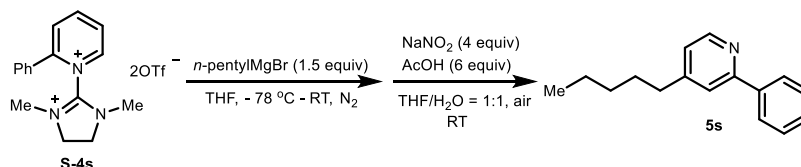

Prepared via **General Procedure II** starting from **S-4s** (165.3 mg, 0.3 mmol, 1.0 equiv) and *n*-pentylMgBr (0.45 mmol, 1.5 equiv) to give 4-pentyl-2-phenylpyridine (**5s**) as a pale-yellow oil.

R<sub>f</sub> = 0.5 (eluent: petroleum ether/EtOAc = 10:1).

Yield 53.2 mg (79%).

#### NMR spectroscopy:

<sup>1</sup>H NMR (CDCl<sub>3</sub>, 400 MHz) δ 8.60 (d, *J* = 5.0 Hz, 1H), 8.01 (d, *J* = 7.4 Hz, 2H), 7.57 (s, 1H), 7.53 – 7.47 (m, 2H), 7.46 – 7.40 (m, 1H), 7.08 (d, *J* = 4.9 Hz, 1H), 2.73 – 2.63 (m, 2H), 1.70 (p, *J* = 7.3 Hz, 2H), 1.45 – 1.32 (m, 4H), 0.94 (t, *J* = 6.7 Hz, 3H).

<sup>13</sup>C NMR (CDCl<sub>3</sub>, 151 MHz) δ 157.4, 152.6, 149.5, 139.6, 128.8, 128.7, 127.0, 122.5, 120.9, 35.5, 31.4, 30.1, 22.5, 14.0.

HRMS calcd for (C<sub>16</sub>H<sub>20</sub>N)<sup>+</sup> [M + H]<sup>+</sup>: 226.1590, found 226.1588.

### 4-pentyl-2-(thiophen-2-yl)pyridine (**5t**)

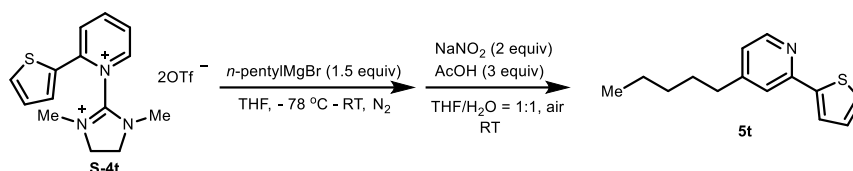

Prepared via **General Procedure II** starting from **S-4t** (167.1 mg, 0.3 mmol, 1.0 equiv) and *n*-pentylMgBr (0.45 mmol, 1.5 equiv) and the NaNO<sub>2</sub> was reduced to 2.0 equiv to give 4-pentyl-2-(thiophen-2-yl)pyridine (**5t**) as a pale yellow oil.

**R<sub>f</sub>** = 0.6 (eluent: petroleum ether/EtOAc = 10:1).

**Yield** 28.5 mg (41%).

**NMR spectroscopy:**

**<sup>1</sup>H NMR** (CDCl<sub>3</sub>, 400 MHz) δ 8.44 (d, *J* = 5.1 Hz, 1H), 7.58 (d, *J* = 3.5 Hz, 1H), 7.47 (s, 1H), 7.37 (d, *J* = 5.0 Hz, 1H), 7.18 – 7.05 (m, 1H), 6.97 (d, *J* = 5.0 Hz, 1H), 2.62 (t, *J* = 7.7 Hz, 2H), 1.65 (p, *J* = 7.4 Hz, 2H), 1.41 – 1.28 (m, 4H), 0.90 (t, *J* = 6.8 Hz, 3H).

**<sup>13</sup>C NMR** (CDCl<sub>3</sub>, 151 MHz) δ 152.6, 152.4, 149.3, 145.0, 128.0, 127.3, 124.3, 122.4, 119.0, 35.4, 31.4, 30.0, 22.5, 14.0.

**HRMS** calcd for (C<sub>14</sub>H<sub>18</sub>NS)<sup>+</sup> [M + H]<sup>+</sup>: 232.1155, found 232.1153.

#### 4-(4-pentylpyridin-2-yl)benzonitrile (**5u**)

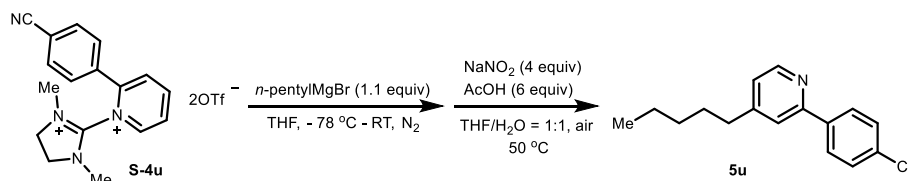

Prepared via **General Procedure II** starting from **S-4u** (172.8 mg, 0.3 mmol, 1.0 equiv) and *n*-pentylMgBr (0.33 mmol, 1.1 equiv) and oxidized at 50 °C for 10 h to give 4-(4-pentylpyridin-2-yl)benzonitrile (**5u**) as a pale yellow oil.

**R<sub>f</sub>** = 0.4 (eluent: petroleum ether/EtOAc = 10:1).

**Yield** 45.2 mg (60%).

**NMR spectroscopy:**

**<sup>1</sup>H NMR** (CDCl<sub>3</sub>, 600 MHz) δ 8.59 (d, *J* = 4.9 Hz, 1H), 8.10 (d, *J* = 8.3 Hz, 2H), 7.74 (d, *J* = 8.3 Hz, 2H), 7.57 (s, 1H), 7.14 (d, *J* = 4.5 Hz, 1H), 2.76 – 2.55 (m, 2H), 1.68 (p, *J* = 7.4 Hz, 2H), 1.42 – 1.30 (m, 4H), 0.90 (t, *J* = 6.8 Hz, 3H).

**<sup>13</sup>C NMR** (CDCl<sub>3</sub>, 151 MHz) δ 155.1, 153.2, 149.8, 143.7, 132.5, 127.5, 123.6, 121.3, 118.9, 112.3, 35.5, 31.4, 30.1, 22.4, 14.0.

**HRMS** calcd for (C<sub>17</sub>H<sub>19</sub>N<sub>2</sub>)<sup>+</sup> [M + H]<sup>+</sup>: 251.1543, found 251.1540.

#### methyl 4-(4-pentylpyridin-2-yl)benzoate (**5v**)

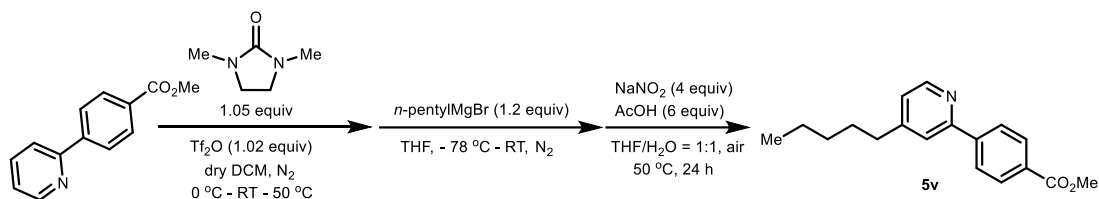

Prepared via **General Procedure III** starting from methyl 4-(pyridin-2-yl)benzoate (213.1.0 mg, 1.0 mmol, 1.0 equiv), *n*-pentyl Grignard reagents (1.2 mmol, 1.2 equiv) and oxidized at 50 °C for 24 h to give methyl 4-(4-pentylpyridin-2-yl)benzoate (**5v**) as a pale yellow oil.

**R<sub>f</sub>** = 0.45 (eluent: petroleum ether/EtOAc = 10:1).

**Yield** 126.3 mg (45%, 86.1 mg starting material).

**NMR spectroscopy:**

**<sup>1</sup>H NMR** (CDCl<sub>3</sub>, 400 MHz) δ 8.57 (d, *J* = 5.0 Hz, 1H), 8.11 (d, *J* = 7.9 Hz, 2H), 8.05 (d, *J* = 8.5 Hz, 2H), 7.57 (s, 1H), 7.08 (d, *J* = 5.0 Hz, 1H), 3.92 (s, 3H), 2.68 – 2.58 (m, 2H), 1.65 (p, *J* = 7.4 Hz, 2H), 1.39 – 1.25 (m, 4H), 0.89 (t, *J* = 6.5 Hz, 3H).

**<sup>13</sup>C NMR** (CDCl<sub>3</sub>, 101 MHz) δ 167.0, 156.1, 152.9, 149.7, 143.8, 130.3, 130.0, 126.9, 123.2, 121.3, 52.2, 35.5, 31.4, 30.2, 22.5, 14.0.

**HRMS** calcd for (C<sub>18</sub>H<sub>22</sub>NO<sub>2</sub>)<sup>+</sup> [M + H]<sup>+</sup>: 284.1645, found 284.1644.

**9-(4-(4-pentylpyridin-2-yl)phenyl)-9H-carbazole (5w)**

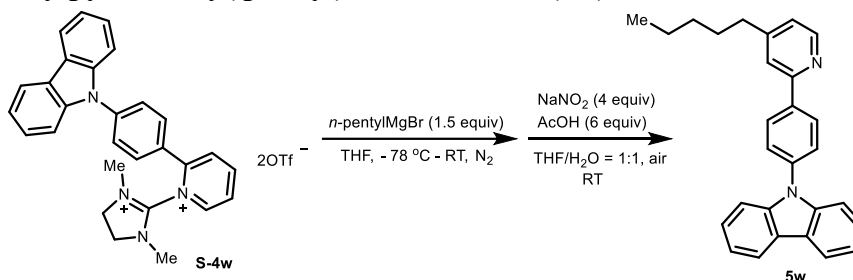

Prepared via **General Procedure II** starting from **S-4w** (214.8 mg, 0.3 mmol, 1.0 equiv) and *n*-pentylMgBr (0.45 mmol, 1.5 equiv) to give 9-(4-(4-pentylpyridin-2-yl)phenyl)-9H-carbazole (**5w**) as a pale green oil.

**R<sub>f</sub>** = 0.5 (eluent: petroleum ether/EtOAc = 10:1).

**Yield** 65.9 mg (56%).

**NMR spectroscopy:**

**<sup>1</sup>H NMR** (CDCl<sub>3</sub>, 600 MHz) δ 8.66 (d, *J* = 5.0 Hz, 1H), 8.26 (d, *J* = 8.4 Hz, 2H), 8.19 (d, *J* = 7.7 Hz, 2H), 7.71 (d, *J* = 8.4 Hz, 2H), 7.67 (s, 1H), 7.52 (d, *J* = 8.2 Hz, 2H), 7.46 (t, *J* = 7.5 Hz, 2H), 7.33 (t, *J* = 7.3 Hz, 2H), 7.14 (d, *J* = 4.7 Hz, 1H), 2.73 (t, *J* = 7.7 Hz, 2H), 1.75 (p, *J* = 7.2 Hz, 2H), 1.54 – 1.28 (m, 4H), 0.97 (t, *J* = 6.5 Hz, 3H).

**<sup>13</sup>C NMR** (CDCl<sub>3</sub>, 151 MHz) δ 156.5, 152.9, 149.7, 140.8, 138.7, 138.3, 128.5, 127.2, 126.1, 123.6, 122.8, 120.9, 120.4, 120.1, 109.9, 35.6, 31.5, 30.2, 22.6, 14.1.

**HRMS** calcd for (C<sub>28</sub>H<sub>27</sub>N<sub>2</sub>)<sup>+</sup> [M + H]<sup>+</sup>: 391.2169, found 391.2164.

**2,4-diphenylpyridine (5x)**

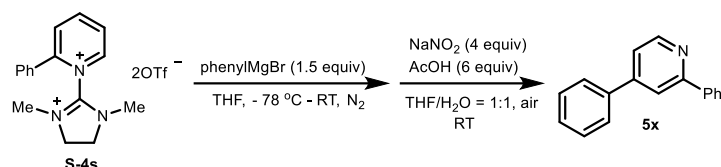

Prepared via **General Procedure II** starting from **S-4s** (165.3 mg, 0.3 mmol, 1.0 equiv) and phenylMgBr (0.45 mmol, 1.5 equiv) to give 2,4-diphenylpyridine (**5x**) as a yellow oil.

$R_f = 0.5$  (eluent: petroleum ether/EtOAc = 10:1).

**Yield** 59.2 mg (85%).

**NMR spectroscopy:**

$^1\text{H NMR}$  ( $\text{CDCl}_3$ , 600 MHz)  $\delta$  8.76 (d,  $J = 5.0$  Hz, 1H), 8.07 (d,  $J = 7.2$  Hz, 2H), 7.94 (s, 1H), 7.70 (d,  $J = 7.1$  Hz, 2H), 7.58 – 7.50 (m, 4H), 7.48 – 7.44 (m, 3H).

$^{13}\text{C NMR}$  ( $\text{CDCl}_3$ , 151 MHz)  $\delta$  158.1, 150.1, 149.4, 139.5, 138.5, 129.2, 129.1, 128.9, 127.14, 127.12, 127.11, 120.3, 118.8.

**HRMS** calcd for  $(\text{C}_{17}\text{H}_{14}\text{N})^+$   $[\text{M} + \text{H}]^+$ : 232.1121, found 232.1119.

#### 4-cyclohexyl-2-phenylpyridine (**5y**)

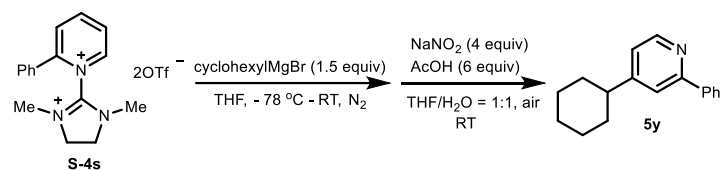

Prepared via **General Procedure II** starting from **S-4s** (165.3 mg, 0.3 mmol, 1.0 equiv) and cyclohexylMgBr (0.45 mmol, 1.5 equiv) to give 4-cyclohexyl-2-phenylpyridine (**5y**) as a yellow oil.

$R_f = 0.5$  (eluent: petroleum ether/EtOAc = 10:1).

**Yield** 53.5 mg (75%).

**NMR spectroscopy:**

$^1\text{H NMR}$  ( $\text{CDCl}_3$ , 600 MHz)  $\delta$  8.58 (d,  $J = 4.8$  Hz, 1H), 7.99 (d,  $J = 7.4$  Hz, 2H), 7.56 (s, 1H), 7.47 (t,  $J = 7.5$  Hz, 2H), 7.40 (t,  $J = 7.3$  Hz, 1H), 7.07 (d,  $J = 4.3$  Hz, 1H), 2.56 (t,  $J = 11.4$  Hz, 1H), 1.92 (d,  $J = 12.2$  Hz, 2H), 1.88 (d,  $J = 12.5$  Hz, 2H), 1.78 (d,  $J = 13.1$  Hz, 1H), 1.52 – 1.35 (m, 4H), 1.33 – 1.18 (m, 1H).

$^{13}\text{C NMR}$  ( $\text{CDCl}_3$ , 151 MHz)  $\delta$  157.5, 157.4, 149.6, 139.8, 128.8, 128.7, 127.0, 120.9, 119.4, 44.1, 33.6, 26.6, 26.0.

**HRMS** calcd for  $(\text{C}_{17}\text{H}_{20}\text{N})^+$   $[\text{M} + \text{H}]^+$ : 238.1590, found 238.1589.

#### 4-(*tert*-butyl)-2-phenylpyridine (**5z**)

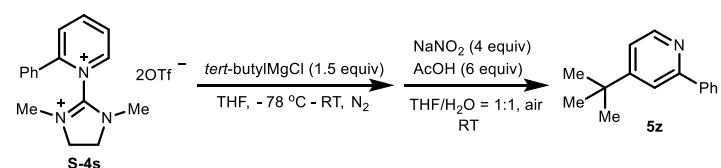

Prepared via **General Procedure II** starting from **S-4s** (165.3 mg, 0.3 mmol, 1.0 equiv) and *tert*-butylMgCl (0.45 mmol, 1.5 equiv) to give 4-(*tert*-butyl)-2-phenylpyridine (**5z**) as a pale yellow oil.

$R_f$  = 0.5 (eluent: petroleum ether/EtOAc = 10:1).

**Yield** 28.6 mg (45%).

**NMR spectroscopy:**

$^1\text{H}$  NMR ( $\text{CDCl}_3$ , 600 MHz)  $\delta$  8.61 (d,  $J$  = 5.2 Hz, 1H), 7.98 (d,  $J$  = 7.2 Hz, 2H), 7.71 (s, 1H), 7.48 (t,  $J$  = 7.6 Hz, 2H), 7.41 (t,  $J$  = 7.3 Hz, 1H), 7.24 (dd,  $J$  = 5.2, 1.8 Hz, 1H), 1.37 (s, 9H).

$^{13}\text{C}$  NMR ( $\text{CDCl}_3$ , 151 MHz)  $\delta$  160.8, 157.5, 149.5, 140.0, 128.8, 128.7, 127.1, 119.4, 117.8, 34.9, 30.6.

**HRMS** calcd for  $(\text{C}_{15}\text{H}_{18}\text{N})^+$   $[\text{M} + \text{H}]^+$ : 212.1434, found 212.1432.

#### 4-pentyl-3-phenylpyridine (**5aa**)

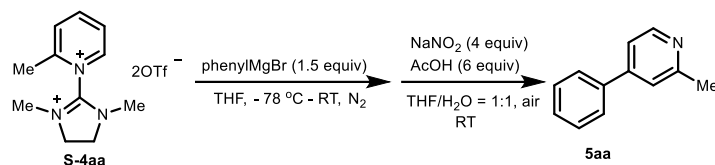

Prepared via **General Procedure II** starting from **S-4aa** (146.7 mg, 0.3 mmol, 1.0 equiv) and phenylMgBr (0.45 mmol, 1.5 equiv) to give 4-pentyl-3-phenylpyridine (**5aa**) as a pale-yellow oil.

$R_f$  = 0.3 (eluent: petroleum ether/EtOAc = 10:1).

**Yield** 21.7 mg (43%).

**NMR spectroscopy:**

$^1\text{H}$  NMR ( $\text{CDCl}_3$ , 600 MHz)  $\delta$  8.53 (d,  $J$  = 5.2 Hz, 1H), 7.62 (d,  $J$  = 7.3 Hz, 2H), 7.47 (t,  $J$  = 7.5 Hz, 2H), 7.42 (t,  $J$  = 7.3 Hz, 1H), 7.37 (s, 1H), 7.31 (d,  $J$  = 4.7 Hz, 1H), 2.62 (s, 3H).

$^{13}\text{C}$  NMR ( $\text{CDCl}_3$ , 151 MHz)  $\delta$  158.8, 149.5, 148.8, 138.4, 129.1, 128.9, 127.0, 121.3, 118.9, 24.5.

**HRMS** calcd for  $(\text{C}_{12}\text{H}_{12}\text{N})^+$   $[\text{M} + \text{H}]^+$ : 170.0964, found 170.0962.

#### 4-cyclohexyl-2-methylpyridine (**5ab**)

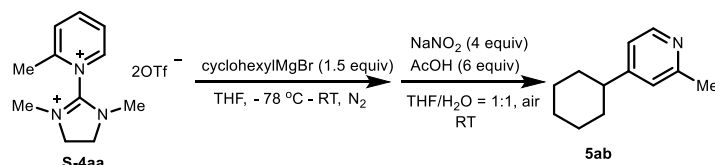

Prepared via **General Procedure II** starting from **S-4aa** (146.7 mg, 0.3 mmol, 1.0 equiv) and cyclohexylMgBr (0.45 mmol, 1.5 equiv) to give 4-cyclohexyl-2-methylpyridine (**5ab**) as a yellow oil.



$R_f$  = 0.3 (eluent: petroleum ether/EtOAc = 10:1).

**Yield** 17.7 mg (34%).

**NMR spectroscopy:**

$^1\text{H}$  NMR ( $\text{CDCl}_3$ , 600 MHz)  $\delta$  8.35 (d,  $J$  = 5.1 Hz, 1H), 6.97 (s, 1H), 6.91 (d,  $J$  = 4.8 Hz, 1H), 2.51 (s, 3H), 2.46 – 2.38 (m, 1H), 1.83 (d,  $J$  = 8.4 Hz, 4H), 1.74 (d,  $J$  = 12.8 Hz, 1H), 1.42 – 1.32 (m, 4H), 1.27 – 1.15 (m, 1H).

$^{13}\text{C}$  NMR ( $\text{CDCl}_3$ , 151 MHz)  $\delta$  158.1, 157.0, 148.9, 121.9, 119.5, 43.9, 33.5, 26.6, 26.0, 24.4.

**HRMS** calcd for  $(\text{C}_{12}\text{H}_{18}\text{N})^+$   $[\text{M} + \text{H}]^+$ : 176.1434, found 176.1432.

**4-pentyl-2-methylpyridine (5ac)**

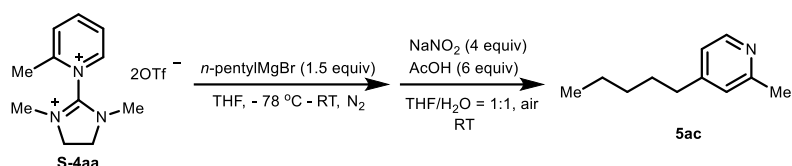

Prepared via **General Procedure II** starting from **S-4aa** (146.7 mg, 0.3 mmol, 1.0 equiv) and *n*-pentylMgBr (0.45 mmol, 1.5 equiv) to give 4-pentyl-2-methylpyridine (**5ac**) as a pale-yellow oil.

$R_f$  = 0.3 (eluent: petroleum ether/EtOAc = 10:1).

**Yield** 18.2 mg (37%).

**NMR spectroscopy:**

$^1\text{H}$  NMR ( $\text{CDCl}_3$ , 600 MHz)  $\delta$  8.35 (d,  $J$  = 5.1 Hz, 1H), 6.96 (s, 1H), 6.90 (d,  $J$  = 4.9 Hz, 1H), 2.56 – 2.52 (m, 2H), 2.51 (s, 3H), 1.59 (p,  $J$  = 7.6 Hz, 2H), 1.36 – 1.24 (m, 4H), 0.88 (t,  $J$  = 7.0 Hz, 3H).

$^{13}\text{C}$  NMR ( $\text{CDCl}_3$ , 151 MHz)  $\delta$  158.0, 152.2, 148.8, 123.5, 121.1, 35.2, 31.4, 30.0, 24.3, 22.5, 14.0.

**HRMS** calcd for  $(\text{C}_{11}\text{H}_{18}\text{N})^+$   $[\text{M} + \text{H}]^+$ : 164.1434, found 164.1432.

**6. C-4 alkylation with organozinc reagent as the nucleophile**

**The preparation of organozinc reagent<sup>[2]</sup>**

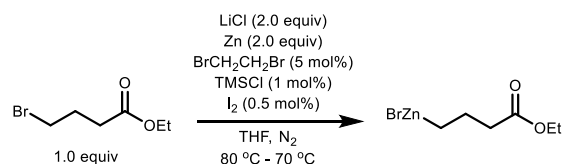

An oven-dried and  $\text{N}_2$  flushed 25 mL Schlenk-tube, equipped with a magnetic stirring bar and a septum, was charged with the anhydrous LiCl (10 mmol, 2.0 equiv) and dried for 10 minutes under the vacuum with the heat gun. Zinc powder (10 mmol, 2.0 equiv) was added under  $\text{N}_2$  and the heterogeneous mixture of Zn and LiCl was dried again for 10 minutes under the vacuum with the heat gun. The sealed tube was backfilled with  $\text{N}_2$  (this process was repeated for three times). THF (5.0 mL) was added and the Zn was

activated with  $\text{BrCH}_2\text{CH}_2\text{Br}$  (5 mol%) under 80 °C for 20 minutes. After cooling,  $\text{Me}_3\text{SiCl}$  (1 mol%) and  $\text{I}_2$  (0.5 mol%) were added under  $\text{N}_2$  atmosphere, then the mixture was refluxed for another 20 minutes. Ethyl 4-bromobutanoate (5.0 mmol) was then added neat at room temperature and the reaction mixture was stirred at 70 °C for 12 h. The concentration of organozinc reagents was titrated by iodine and the concentration is approximately 0.5 M. The resulting suspension (approx. 0.5 M) can be used directly by syringe and stored in the refrigerator for several days.

### ethyl 4-(pyridin-4-yl)butanoate (**5ad**)

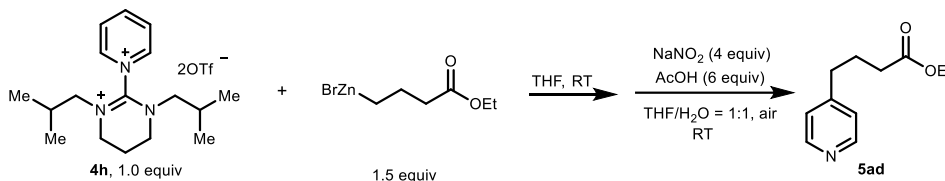

An oven-dried and  $\text{N}_2$  flushed 25 mL Schlenk-tube, equipped with a magnetic stirring bar and a septum, was charged with the **4h** (171.9 mg, 0.3 mmol, 1.0 equiv) and dry THF (3.0 mL). Organozinc reagent (0.5 M in THF, 0.9 mL, 0.45 mmol, 1.5 equiv) was added dropwise within 1 minute and the reaction mixture was stirred at room temperature for 16 h to give a yellow suspension. Water (3.0 mL) was added in one portion and the reaction mixture was stirred for 5 minutes at room temperature, then  $\text{NaNO}_2$  aqueous solution (100 mg/mL, 0.83 mL, 4.0 equiv) and acetic acid (103  $\mu\text{L}$ , 6.0 equiv) were added in one portion and the mixture were stirred for 10 hours at room temperature. The mixture was neutralized with a saturated sodium bicarbonate solution (2.0 mL), extracted with EtOAc ( $3 \times 8.0$  mL) and the combined organic layers were washed with brine, dried over anhydrous  $\text{Na}_2\text{SO}_4$ , filtered, and concentrated under reduced pressure. The residue was purified by column chromatography on silica gel to afford C-4 alkylation pyridine product (**5ad**) as a yellow oil.

$R_f = 0.4$  (eluent: petroleum ether/EtOAc = 1:1).

**Yield** 30.1 mg (52%).

#### NMR spectroscopy:

$^1\text{H NMR}$  ( $\text{CDCl}_3$ , 400 MHz)  $\delta$  8.46 (d,  $J = 5.5$  Hz, 2H), 7.09 (d,  $J = 5.5$  Hz, 2H), 4.10 (q,  $J = 7.1$  Hz, 2H), 2.65 – 2.53 (m, 2H), 2.30 (t,  $J = 7.4$  Hz, 2H), 1.94 (p,  $J = 7.4$  Hz, 2H), 1.22 (t,  $J = 7.1$  Hz, 3H).

$^{13}\text{C NMR}$  ( $\text{CDCl}_3$ , 101 MHz)  $\delta$  173.1, 150.5, 149.7, 123.9, 60.5, 34.4, 33.5, 25.4, 14.2.

**HRMS** calcd for  $(\text{C}_{11}\text{H}_{16}\text{NO}_2)^+$   $[\text{M} + \text{H}]^+$ : 194.1176, found 194.1170.

## 7. C-4 cyanation with TMSCN as the nucleophile

An oven-dried and  $\text{N}_2$  flushed 25 mL Schlenk-tube, equipped with a magnetic stirring bar and a septum, was charged with the corresponding pyridine salt (0.1 mmol, 1.0 equiv), dry  $\text{CH}_3\text{CN}$  (1.0 mL) and TMSCN (25.0  $\mu\text{L}$ , 0.2 mmol, 2.0 equiv). The resulting solution was heated to 60 °C and stirred vigorously overnight (Note: this reaction can be monitored by TLC, eluent: DCM/MeOH = 10:1). Then the mixture was concentrated

under reduced pressure and diluted by DMF (1.0 mL), and the oxidant  $\text{Mn}(\text{OAc})_3 \cdot 2\text{H}_2\text{O}$  (66.5 mg, 0.5 mmol, 5.0 equiv) was added in one portion. The reaction mixture was stirred at 110 °C for 18 h. The reaction mixture was diluted by EtOAc (5.0 mL), filtered with silica gel, extracted with water (5.0 mL) and EtOAc ( $3 \times 5.0$  mL). The combined organic layers were washed with brine, dried over anhydrous  $\text{Na}_2\text{SO}_4$ , filtered, and concentrated under reduced pressure. The residue was purified by column chromatography on silica gel to afford C-4 cyanation pyridine products.

### ethyl 4-cyanonicotinate (**5ae**)

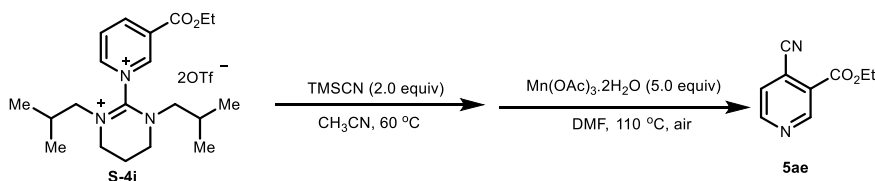

Prepared via the above procedure starting from **S-4i** (64.5 mg, 0.1 mmol, 1.0 equiv) to give ethyl 4-cyanonicotinate (**5ae**) as a white solid.

$R_f$  = 0.4 (eluent: petroleum ether/EtOAc = 5:1).

**Yield** 12.8 mg (73%).

#### NMR spectroscopy:

$^1\text{H}$  NMR ( $\text{CDCl}_3$ , 600 MHz)  $\delta$  9.39 (s, 1H), 8.99 – 8.91 (br, 1H), 7.68 (d,  $J$  = 4.6 Hz, 1H), 4.52 (q,  $J$  = 7.1 Hz, 2H), 1.47 (t,  $J$  = 7.1 Hz, 3H).

$^{13}\text{C}$  NMR ( $\text{CDCl}_3$ , 151 MHz)  $\delta$  162.7, 153.6, 152.3, 127.2, 126.3, 120.9, 115.3, 62.8, 14.1.

**HRMS** calcd for  $(\text{C}_9\text{H}_9\text{N}_2\text{O}_2)^+$   $[\text{M} + \text{H}]^+$ : 177.0659, found 177.0658.

### 3-chloroisonicotinonitrile (**5af**)

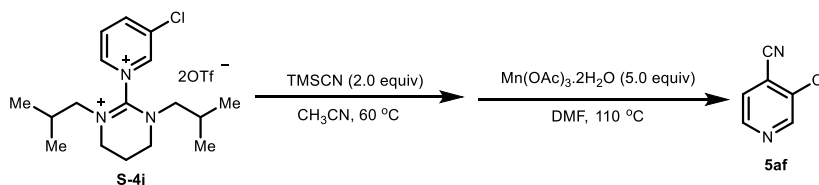

Prepared via the above procedure starting from **S-4j** (60.7 mg, 0.1 mmol, 1.0 equiv) to give 3-chloroisonicotinonitrile (**5af**) as a white solid.

$R_f$  = 0.5 (eluent: petroleum ether/EtOAc = 5:1).

**Yield** 5.5 mg (40%).

#### NMR spectroscopy:

$^1\text{H}$  NMR ( $\text{CDCl}_3$ , 400 MHz)  $\delta$  8.81 (s, 1H), 8.67 (d,  $J$  = 4.9 Hz, 1H), 7.56 (d,  $J$  = 4.9 Hz, 1H).

$^{13}\text{C}$  NMR ( $\text{CDCl}_3$ , 101 MHz)  $\delta$  150.4, 148.1, 133.1, 126.3, 120.9, 113.7.

**HRMS** calcd for  $(\text{C}_6\text{H}_4\text{ClN}_2)^+$   $[\text{M} + \text{H}]^+$ : 139.0058, found 139.0055.

## 8. C-4 arylation with phenyl lithium as the nucleophile

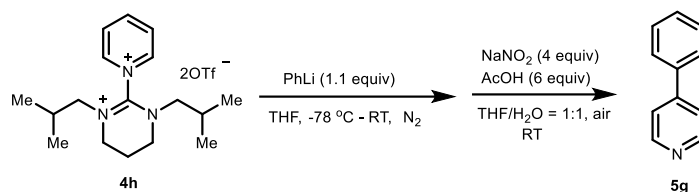

An oven-dried and N<sub>2</sub> flushed 25 mL Schlenk-tube, equipped with a magnetic stirring bar and a septum, was charged with **4h** (171.9 mg, 0.3 mmol, 1.0 equiv) and dry THF (3.0 mL). The resulting suspension was cooled to -78 °C. PhLi (1.9 M in hexane, 0.17 mL, 0.33 mmol, 1.1 equiv) was added dropwise within 3 minutes and the reaction mixture was stirred at -78 °C for 3 minutes to give a red solution. Water (3.0 mL) was added in one portion and the reaction mixture was stirred for 5 minutes at room temperature, then NaNO<sub>2</sub> aqueous solution (100 mg/ mL, 0.83 mL, 4.0 equiv) and acetic acid (103 μL, 6.0 equiv) were added in one portion and the mixture were stirred for 10 hours at room temperature. The mixture was neutralized with a saturated sodium bicarbonate solution (2.0 mL), extracted with EtOAc (3 × 8.0 mL) and the combined organic layers were washed with brine, dried over anhydrous Na<sub>2</sub>SO<sub>4</sub>, filtered, and concentrated under reduced pressure. The residue was purified by column chromatography on silica gel to afford C-4 arylation pyridine products (**5g**) as a white solid.

R<sub>f</sub> = 0.3 (eluent: petroleum ether/EtOAc = 5:1).

Yield 19.5 mg (42%).

### NMR spectroscopy:

The NMR spectroscopy and HRMS data of **5g** has already been written on page S18.

## 9. C-4 alkylation with the enolate as the nucleophile

### The preparation of lithium 2-methyl-1-phenylprop-1-en-1-olate

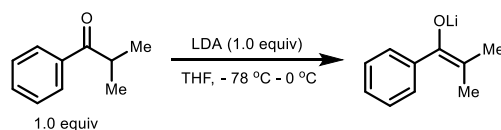

An oven-dried and N<sub>2</sub> flushed 25 mL Schlenk-tube, equipped with a magnetic stirring bar and a septum, was charged with the corresponding 2-methyl-1-phenylpropan-1-one (296.0 mg, 2.0 mmol, 1.0 equiv) and dry THF (3.7 mL). The resulting solution was cooled to -78 °C. LDA (2.0 M in hexane, 1.0 mL, 2.0 mmol, 1.0 equiv) was added dropwise within 3 minutes and the reaction mixture was stirred at -78 °C for 1 h. Then the reaction tube was transferred to an ice bath and stirred for 30 min. The resulting brown solution (approx. 0.4 M) can be used directly by syringe and stored in the refrigerator for several days.

### 2-methyl-1-phenyl-2-(pyridin-4-yl)propan-1-one (**5ag**)

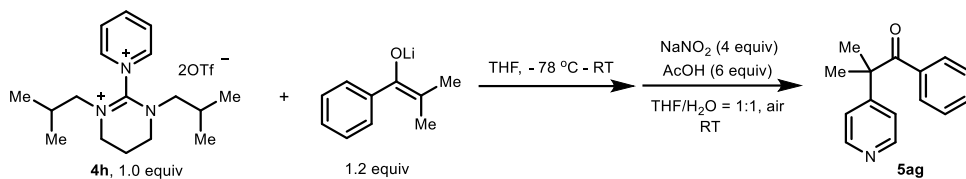

An oven-dried and N<sub>2</sub> flushed 25 mL Schlenk-tube, equipped with a magnetic stirring bar and a septum, was charged with **4h** (171.9 mg, 0.3 mmol, 1.0 equiv) and dry THF (3.0 mL). The resulting suspension was cooled to -78 °C. 2-Methyl-1-phenylprop-1-en-1-olate (0.4 M in THF, 0.9 mL, 0.36 mmol, 1.2 equiv) was added dropwise within 3 minutes and the reaction mixture was stirred at -78 °C for 20 minutes to give a clear solution. Water (3.0 mL) was added in one portion and the reaction mixture was stirred for 5 minutes at room temperature, then NaNO<sub>2</sub> aqueous solution (100 mg/ mL, 0.83 mL, 4.0 equiv) and acetic acid (103 μL, 6.0 equiv) were added in one portion and the mixture were stirred for 10 hours at room temperature. The mixture was neutralized with a saturated sodium bicarbonate solution (2.0 mL), extracted with EtOAc (3 × 8.0 mL) and the combined organic layers were washed with brine, dried over anhydrous Na<sub>2</sub>SO<sub>4</sub>, filtered, and concentrated under reduced pressure. The residue was purified by column chromatography on silica gel to afford C-4 alkylation pyridine product (**5ag**) as a yellow oil.

R<sub>f</sub> = 0.15 (eluent: petroleum ether/EtOAc = 5:1).

Yield 34.4 mg (51%).

**NMR spectroscopy:**

<sup>1</sup>H NMR (CDCl<sub>3</sub>, 400 MHz) δ 8.57 (d, *J* = 4.2 Hz, 2H), 7.47 (d, *J* = 8.5 Hz, 2H), 7.38 (t, *J* = 7.4 Hz, 1H), 7.26 – 7.18 (m, 4H), 1.60 (s, 6H).

<sup>13</sup>C NMR (CDCl<sub>3</sub>, 101 MHz) δ 202.0, 154.7, 150.4, 135.4, 132.2, 129.6, 128.2, 121.0, 51.2, 27.4.

HRMS calcd for (C<sub>15</sub>H<sub>16</sub>NO)<sup>+</sup> [M + H]<sup>+</sup>: 226.1226, found 226.1225.

## 10. C-4 alkylation with silyl ketene acetal as the nucleophile

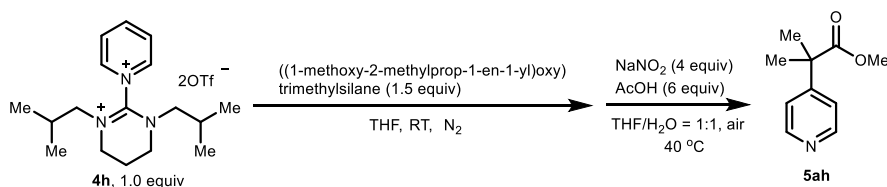

An oven-dried and N<sub>2</sub> flushed 25 mL Schlenk-tube, equipped with a magnetic stirring bar and a septum, was charged with **4h** (114.6 mg, 0.2 mmol, 1.0 equiv), dry THF (2.0 mL) and ((1-methoxy-2-methylprop-1-en-1-yl)oxy)trimethylsilane (52.3 mg, 0.30 mmol, 1.5 equiv). The resulting suspension was stirred for 10 minutes at room temperature and the suspension changed to a clear solution. (Note: this reaction can be monitored by TLC, DCM/MeOH = 10:1). Water (2.0 mL) was added in one portion at room temperature, then NaNO<sub>2</sub> aqueous solution (100 mg/ mL, 0.55 mL, 4.0 equiv) and acetic acid (69 μL, 6.0 equiv) were added in one portion and the mixture were stirred for 10 hours at 40 °C. The mixture was neutralized with a saturated sodium

bicarbonate solution (2.0 mL), extracted with EtOAc (3 × 6.0 mL) and the combined organic layers were washed with brine, dried over anhydrous Na<sub>2</sub>SO<sub>4</sub>, filtered, and concentrated under reduced pressure. The residue was purified by column chromatography on silica gel to afford C-4 alkylation pyridine products (**5ah**) as a pale-yellow oil.

R<sub>f</sub> = 0.7 (eluent: petroleum ether/EtOAc = 5:1).

Yield 24.1 mg (67%).

**NMR spectroscopy:**

<sup>1</sup>H NMR (CDCl<sub>3</sub>, 400 MHz) δ 8.53 (d, *J* = 4.6 Hz, 2H), 7.22 (d, *J* = 6.1 Hz, 2H), 3.65 (s, 3H), 1.55 (s, 6H).

<sup>13</sup>C NMR (CDCl<sub>3</sub>, 101 MHz) δ 175.9, 153.5, 149.8, 121.1, 52.4, 46.4, 25.8.

HRMS calcd for (C<sub>10</sub>H<sub>14</sub>NO<sub>2</sub>)<sup>+</sup> [M + H]<sup>+</sup>: 180.1019, found 180.1018.

## 11. C-4 alkylation with nitronate as the nucleophile

### The preparation of (2-nitropropan-2-yl)lithium

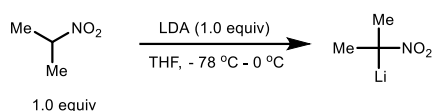

An oven-dried and N<sub>2</sub> flushed 25 mL Schlenk-tube, equipped with a magnetic stirring bar and a septum, was charged with the corresponding 2-nitropropane (178.0 mg, 2.0 mmol, 1.0 equiv) and dry THF (3.8 mL). The resulting solution was cooled to -78 °C. LDA (2.0 M in hexane, 1.0 mL, 2.0 mmol, 1.0 equiv) was added dropwise within 3 minutes and the reaction mixture was stirred at -78 °C for 1 h. Then the reaction tube was transferred to an ice bath and stirred for 30 min. The resulting yellow solution (approx. 0.4 M) can be used directly by syringe and stored in the refrigerator for several days.

### 4-(2-nitropropan-2-yl)pyridine (**5ai**)

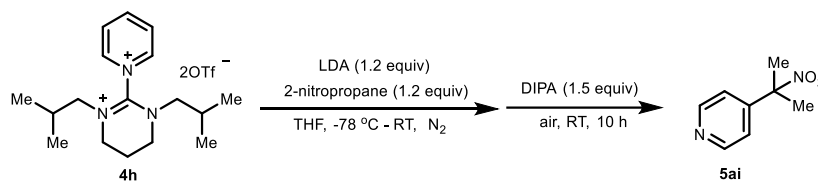

An oven-dried and N<sub>2</sub> flushed 25 mL Schlenk-tube, equipped with a magnetic stirring bar and a septum, was charged with the corresponding **4h** (114.6 mg, 0.2 mmol, 1.0 equiv) and dry THF (2.0 mL). The resulting suspension was cooled to -78 °C. (2-nitropropan-2-yl)lithium (0.4 M in THF, 0.6 mL, 0.24 mmol, 1.2 equiv) was added dropwise within 3 minutes and the reaction mixture was stirred at -78 °C for 20 minutes to give a clear solution. Water (3.0 mL) was added in one portion and the reaction mixture stirred for 5 minutes at room temperature, then DCM (5.0 mL) was added and the mixture was extracted with DCM (3 × 5.0 mL) and the combined organic layers were concentrated under reduced pressure. The residue was dissolved by CH<sub>3</sub>CN (2.0

mL), the oxidant DIPA ((diacetoxyiodo)benzene, 96.6 mg, 0.3 mmol, 1.5 equiv) was added in one portion and stirred at room temperature for 10 h. The mixture was neutralized with a saturated sodium bicarbonate solution (2.0 mL), extracted with EtOAc (3 × 5.0 mL) and the combined organic layers were washed with brine, dried over anhydrous Na<sub>2</sub>SO<sub>4</sub>, filtered, and concentrated under reduced pressure. The residue was purified by column chromatography on silica gel to afford C-4 alkylation pyridine product (**5ai**) as a yellow oil.

**R<sub>f</sub>** = 0.2 (eluent: petroleum ether/EtOAc = 2:1).

**Yield** 16.7 mg (50%).

**NMR spectroscopy:**

**<sup>1</sup>H NMR** (CDCl<sub>3</sub>, 400 MHz) δ 8.66 (d, *J* = 6.2 Hz, 2H), 7.29 (d, *J* = 6.2 Hz, 2H), 1.98 (s, 6H).

**<sup>13</sup>C NMR** (CDCl<sub>3</sub>, 101 MHz) δ 150.4, 148.9, 120.0, 89.1, 26.9.

**HRMS** calcd for (C<sub>8</sub>H<sub>11</sub>N<sub>2</sub>O<sub>2</sub>)<sup>+</sup> [M + H]<sup>+</sup>: 167.0815, found 167.0813.

## 12. C-4 alkylation with malonates as the nucleophile

An oven-dried and N<sub>2</sub> flushed 10 mL Schlenk-tube equipped with the screw cap and magnetic stirring bar, was charged with the corresponding malonate (0.15 mmol, 1.5 equiv), dry CH<sub>3</sub>CN (1.0 mL) and NaH (0.15 mmol, 6.0 mg, 1.5 equiv). The reaction mixture was stirred at room temperature for 5 minutes. Then corresponding pyridine salt (0.1 mmol, 1.0 equiv) and dry CH<sub>3</sub>CN (1.0 mL) were added in sequence. The resulting mixture was stirred at room temperature for 2 h and monitored by TLC (eluent: DCM/MeOH = 10:1). After the reaction was completed, DIPA (phenyliodine diacetate, 0.15 mmol, 48.3 mg, 1.5 equiv) was added to the tube under atmospheric conditions. The resulting mixture was stirred at room temperature for 10 h. Upon completion, the reaction was neutralized with saturated NaHCO<sub>3</sub> aqueous solution (2.0 mL) (pH >8). The crude mixture was diluted by DCM (5.0 mL) and the aqueous phase was extracted with DCM (3 × 5.0 mL). Then the combined organic layers were dried over Na<sub>2</sub>SO<sub>4</sub>, filtered, and concentrated in vacuo. The crude material was purified on silica gel chromatography to afford C-4 alkylation pyridine products.

### diethyl 2-benzyl-2-(pyridin-4-yl)malonate (**5aj**)

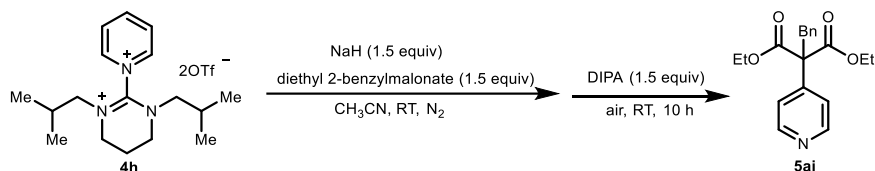

Prepared via the above procedure starting from **4h** (0.1 mmol, 57.3 mg, 1.0 equiv) to give diethyl 2-benzyl-2-(pyridin-4-yl)malonate (**5aj**) as a yellow oil.

**R<sub>f</sub>** = 0.5 (eluent: petroleum ether/EtOAc = 5:1).

**Yield** 16.1 mg (49%).

**NMR spectroscopy:**

<sup>1</sup>H NMR (CDCl<sub>3</sub>, 400 MHz) δ 8.60 – 8.38 (br, 2H), 7.21 – 7.10 (m, 5H), 6.82 (d, *J* = 7.0 Hz, 2H), 4.23 (q, *J* = 7.1 Hz, 4H), 3.57 (s, 2H), 1.23 (t, *J* = 7.1 Hz, 6H).

<sup>13</sup>C NMR (CDCl<sub>3</sub>, 101 MHz) δ 169.0, 149.2, 145.8, 135.0, 130.3, 128.1, 127.2, 123.5, 63.8, 62.1, 42.7, 13.9.

HRMS calcd for (C<sub>19</sub>H<sub>22</sub>NO<sub>4</sub>)<sup>+</sup> [M + H]<sup>+</sup>: 328.1543, found 328.1542.

**diethyl 2-phenyl-2-(pyridin-4-yl)malonate (5ak)**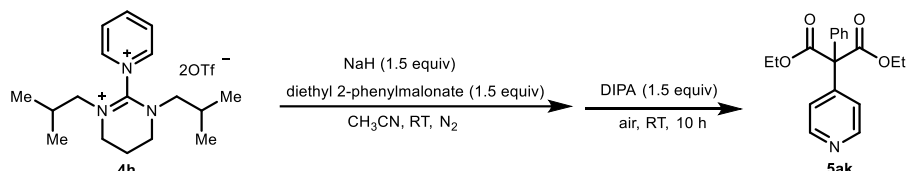

Prepared via the above procedure starting from **4h** (0.1 mmol, 57.3 mg, 1.0 equiv) to give diethyl 2-phenyl-2-(pyridin-4-yl)malonate (**5ak**) as a yellow oil.

R<sub>f</sub> = 0.3 (eluent: petroleum ether/EtOAc = 5:1).

Yield 14.0 mg (45%).

**NMR spectroscopy:**

<sup>1</sup>H NMR (CDCl<sub>3</sub>, 400 MHz) δ 8.57 (d, *J* = 6.4 Hz, 2H), 7.39 – 7.29 (m, 7H), 4.29 (q, *J* = 7.1 Hz, 4H), 1.24 (t, *J* = 7.1 Hz, 6H).

<sup>13</sup>C NMR (CDCl<sub>3</sub>, 151 MHz) δ 168.7, 149.4, 147.6, 137.1, 129.3, 128.2, 128.0, 124.4, 67.9, 62.3, 13.8.

HRMS calcd for (C<sub>18</sub>H<sub>20</sub>NO<sub>4</sub>)<sup>+</sup> [M + H]<sup>+</sup>: 314.1387, found 314.1385.

**diethyl 2-allyl-2-(pyridin-4-yl)malonate (5al)**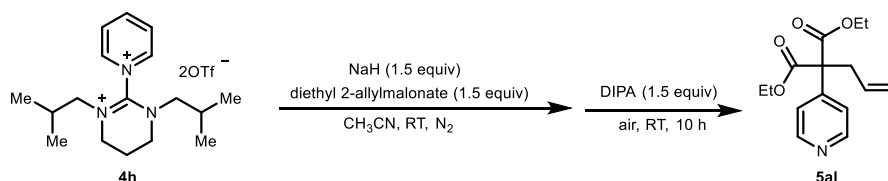

Prepared via the above procedure starting from **4h** (0.1 mmol, 57.3 mg, 1.0 equiv) to give diethyl 2-allyl-2-(pyridin-4-yl)malonate (**5al**) as a yellow oil.

R<sub>f</sub> = 0.3 (eluent: petroleum ether/EtOAc = 5:1).

Yield 16.0 mg (58%).

**NMR spectroscopy:**

<sup>1</sup>H NMR (CDCl<sub>3</sub>, 400 MHz) δ 8.61 – 8.56 (m, 2H), 7.40 – 7.35 (m, 2H), 5.75 – 5.61 (m, 1H), 5.08 (s, 1H), 5.06 – 5.02 (m, 1H), 4.30 – 4.16 (m, 4H), 3.03 (d, *J* = 7.1 Hz, 2H), 1.25 (t, *J* = 7.1 Hz, 6H).

<sup>13</sup>C NMR (CDCl<sub>3</sub>, 101 MHz) δ 169.1, 149.5, 149.4, 131.9, 123.3, 119.7, 62.3, 62.0, 40.0, 14.0.

HRMS calcd for (C<sub>15</sub>H<sub>20</sub>NO<sub>4</sub>)<sup>+</sup> [M + H]<sup>+</sup>: 278.1387, found 278.1386.



### diethyl 2-benzyl-2-(3-chloropyridin-4-yl)malonate (**5am**)

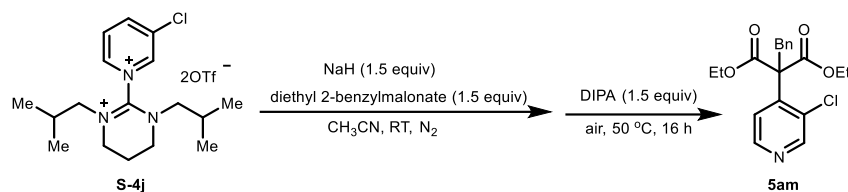

Prepared via the above procedure starting from **S-4j** (60.7 mg, 0.1 mmol, 1.0 equiv) and oxidized at 50 °C for 16 h to give diethyl 2-benzyl-2-(3-chloropyridin-4-yl)malonate (**5am**) as a colorless oil.

**R<sub>f</sub>** = 0.5 (eluent: petroleum ether/EtOAc = 5:1).

**Yield** 20.0 mg (55%).

#### NMR spectroscopy:

**<sup>1</sup>H NMR** (CDCl<sub>3</sub>, 400 MHz) δ 8.57 (s, 1H), 8.25 (d, *J* = 5.4 Hz, 1H), 7.17 – 7.04 (m, 4H), 6.91 – 6.84 (m, 2H), 4.35 – 4.20 (m, 4H), 3.75 (s, 2H), 1.26 (t, *J* = 7.2 Hz, 6H).

**<sup>13</sup>C NMR** (CDCl<sub>3</sub>, 101 MHz) δ 168.1, 150.2, 146.9, 144.3, 135.4, 130.5, 127.9, 127.0, 125.6, 64.3, 62.5, 39.2, 13.8.

**HRMS** calcd for (C<sub>19</sub>H<sub>21</sub>ClNO<sub>4</sub>)<sup>+</sup> [*M* + *H*]<sup>+</sup>: 362.1154, found 362.1164.

### 13. C-4 alkylation with carboxylic acids as the radical precursors <sup>[3]</sup>

To a 10 mL culture tube equipped with the Teflon septum screw cap and containing a stir bar, the corresponding pyridinium salt (0.2 mmol, 1.0 equiv), carboxylic acid (0.4 mmol, 2.0 equiv, in several substrates the carboxylic acid were used 4.0 equiv), (NH<sub>4</sub>)<sub>2</sub>S<sub>2</sub>O<sub>8</sub> (91.3 mg, 0.4 mmol, 2.0 equiv), AgNO<sub>3</sub> (6.8 mg, 0.04 mmol, 20 mol%), dichloroethane (1.0 mL) and H<sub>2</sub>O (1.0 mL) were added under atmospheric conditions and stirred at 50 °C for 10 h. Upon completion, the reaction was neutralized with saturated NaHCO<sub>3</sub> aqueous solution (2.0 mL) (pH >8). The crude mixture was diluted by DCM (3.0 mL) and the aqueous phase was extracted with DCM (3 × 3.0 mL). Then the combined organic layers were dried over Na<sub>2</sub>SO<sub>4</sub>, filtered, and concentrated in vacuo. (The reaction mixture was analyzed by GC-MS and crude NMR dissolved in CDCl<sub>3</sub>. 1, 3, 5-trimethoxybenzene (2.7 mg) was used as an internal standard. The C-2 alkylated product was not observed in crude NMR spectroscopy and GC-MS.) The crude material was purified on silica gel chromatography to afford C-4 alkylation pyridine products **5**.

#### 4-cyclohexylpyridine (**5b**)

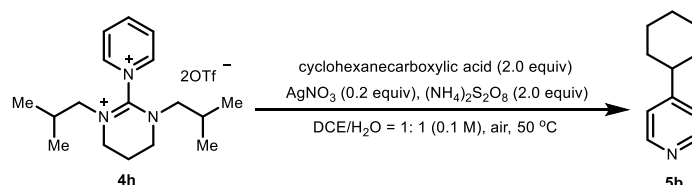

Prepared via the above procedure starting from **4h** (114.6 mg, 0.2 mmol, 1.0 equiv) and cyclohexanecarboxylic acid (51.4 mg, 0.4 mmol, 2.0 equiv) to give 4-

cyclohexylpyridine (**5b**) as a colorless oil.

$R_f$  = 0.3 (eluent: petroleum ether/EtOAc = 10:1).

**Yield** 22.6 mg (70%).

The NMR spectroscopy and HRMS data of **5b** has already been written on page S15.

#### 4-(pyridin-4-yl)cyclohexan-1-one (**5an**)

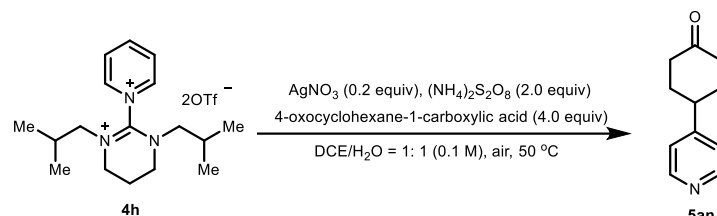

Prepared via the above procedure starting from **4h** (114.6 mg, 0.2 mmol, 1.0 equiv) and 4-oxocyclohexane-1-carboxylic acid (113.6 mg, 0.8 mmol, 4.0 equiv) to give 4-(pyridin-4-yl)cyclohexan-1-one (**5an**) as a pale yellow oil.

$R_f$  = 0.25 (eluent: petroleum ether/EtOAc = 1:1).

**Yield** 12.2 mg (35%).

#### NMR spectroscopy:

$^1\text{H}$  NMR ( $\text{CDCl}_3$ , 400 MHz)  $\delta$  8.54 (d,  $J$  = 6.0 Hz, 2H), 7.18 (d,  $J$  = 6.0 Hz, 2H), 3.02 (tt,  $J$  = 12.1, 3.3 Hz, 1H), 2.56 – 2.48 (m, 4H), 2.28 – 2.18 (m, 2H), 2.01 – 1.85 (m, 2H).

$^{13}\text{C}$  NMR ( $\text{CDCl}_3$ , 101 MHz)  $\delta$  210.0, 153.8, 149.8, 122.2, 42.0, 41.0, 33.0.

**HRMS** calcd for  $(\text{C}_{11}\text{H}_{14}\text{NO})^+$   $[\text{M} + \text{H}]^+$ : 176.1070, found 176.1069.

#### 4-(adamantan-1-yl)pyridine (**5ao**)

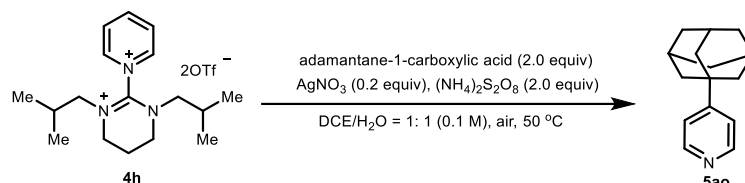

Prepared via the above procedure starting from **4h** (114.6 mg, 0.2 mmol, 1.0 equiv) and adamantane-1-carboxylic acid (72.0 mg, 0.4 mmol, 2.0 equiv) to give 4-(adamantan-1-yl)pyridine (**5ao**) as a white solid.

$R_f$  = 0.4 (eluent: petroleum ether/EtOAc = 5:1).

**Yield** 19.8 mg (46%).

#### NMR spectroscopy:

$^1\text{H}$  NMR ( $\text{CDCl}_3$ , 400 MHz)  $\delta$  8.51 (d,  $J$  = 4.7 Hz, 2H), 7.24 (d,  $J$  = 6.0 Hz, 2H), 2.14 – 2.07 (br, 3H), 1.88 (d,  $J$  = 2.3 Hz, 6H), 1.83 – 1.70 (m, 6H).

$^{13}\text{C}$  NMR ( $\text{CDCl}_3$ , 101 MHz)  $\delta$  160.0, 149.6, 120.4, 42.3, 36.6, 36.2, 28.6.

**HRMS** calcd for  $(\text{C}_{15}\text{H}_{20}\text{N})^+$   $[\text{M} + \text{H}]^+$ : 214.1590, found 214.1589.

#### 4-(4-chlorobutyl)pyridine (**5ap**)

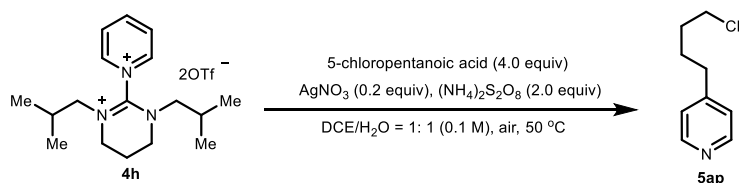

Prepared via the above procedure starting from **4h** (114.6 mg, 0.2 mmol, 1.0 equiv) and 5-chloropentanoic acid (109.3 mg, 0.8 mmol, 4.0 equiv) to give 4-(4-chlorobutyl)pyridine (**5ap**) as a pale yellow oil.

$R_f$  = 0.25 (eluent: petroleum ether/EtOAc = 5:1).

**Yield** 16.3 mg (48%).

**NMR spectroscopy:**

$^1\text{H NMR}$  ( $\text{CDCl}_3$ , 400 MHz)  $\delta$  8.49 (d,  $J$  = 4.9 Hz, 2H), 7.10 (d,  $J$  = 5.4 Hz, 2H), 3.59 – 3.48 (m, 2H), 2.63 (t,  $J$  = 7.0 Hz, 2H), 1.84 – 1.72 (m, 4H).

$^{13}\text{C NMR}$  ( $\text{CDCl}_3$ , 101 MHz)  $\delta$  150.7, 149.7, 123.8, 44.6, 34.4, 31.9, 27.4.

**HRMS** calcd for  $(\text{C}_9\text{H}_{13}\text{ClN})^+$   $[\text{M} + \text{H}]^+$ : 170.0731, found 170.0730.

#### 4-cyclobutylpyridine (**5aq**)

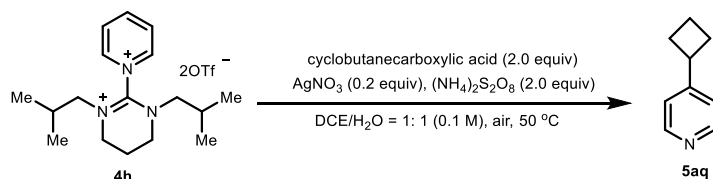

Prepared via the above procedure starting from **4h** (114.6 mg, 0.2 mmol, 1.0 equiv) and cyclobutanecarboxylic acid (40.0 mg, 0.4 mmol, 2.0 equiv) to give 4-cyclobutylpyridine (**5aq**) as a pale-yellow oil. (Due to the product is volatile, the yield of this substrate was determined by crude NMR, 1,3,5-trimethoxybenzene (2.7 mg) as the internal standard.)

$R_f$  = 0.4 (eluent: petroleum ether/EtOAc = 5:1).

**Yield** 7.2 mg (NMR yield: 56%, isolate yield: 27%).

**NMR spectroscopy:**

$^1\text{H NMR}$  ( $\text{CDCl}_3$ , 400 MHz)  $\delta$  8.50 (d,  $J$  = 5.1 Hz, 2H), 7.16 (d,  $J$  = 5.8 Hz, 2H), 3.55 (p,  $J$  = 8.6 Hz, 1H), 2.44 – 2.35 (m, 2H), 2.21 – 2.13 (m, 2H), 2.11 – 2.02 (m, 1H), 1.95 – 1.86 (m, 1H).

$^{13}\text{C NMR}$  ( $\text{CDCl}_3$ , 101 MHz)  $\delta$  155.2, 149.4, 121.8, 39.3, 28.9, 18.4.

**HRMS** calcd for  $(\text{C}_9\text{H}_{12}\text{N})^+$   $[\text{M} + \text{H}]^+$ : 134.0964, found 134.0965.

#### 4-(tetrahydro-2H-pyran-4-yl)pyridine (**5ar**)

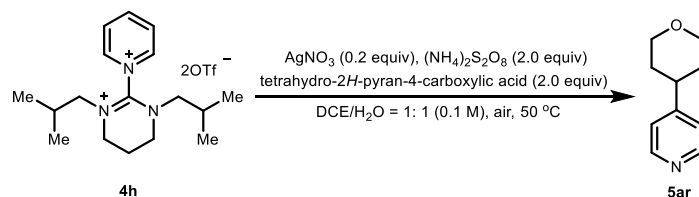

Prepared via the above procedure starting from **4h** (114.6 mg, 0.2 mmol, 1.0 equiv) and tetrahydro-2*H*-pyran-4-carboxylic acid (52.0 mg, 0.4 mmol, 2.0 equiv) to give 4-(tetrahydro-2*H*-pyran-4-yl)pyridine (**5ar**) as a colorless oil.

**R<sub>f</sub>** = 0.5 (eluent: petroleum ether/EtOAc = 1:1).

**Yield** 20.0 mg (61%).

**NMR spectroscopy:**

**<sup>1</sup>H NMR** (CDCl<sub>3</sub>, 600 MHz) δ 8.53 (d, *J* = 4.8 Hz, 2H), 7.16 (d, *J* = 5.6 Hz, 2H), 4.12 – 4.06 (m, 2H), 3.53 (td, *J* = 11.4, 3.2 Hz, 2H), 2.81 – 2.73 (m, 1H), 1.85 – 1.72 (m, 4H).

**<sup>13</sup>C NMR** (CDCl<sub>3</sub>, 151 MHz) δ 154.7, 149.7, 122.3, 68.0, 40.9, 32.9.

**HRMS** calcd for (C<sub>10</sub>H<sub>14</sub>NO)<sup>+</sup> [M + H]<sup>+</sup>: 164.1070, found 164.1069.

### methyl 4-(pyridin-4-yl)bicyclo[2.2.2]octane-1-carboxylate (**5as**)

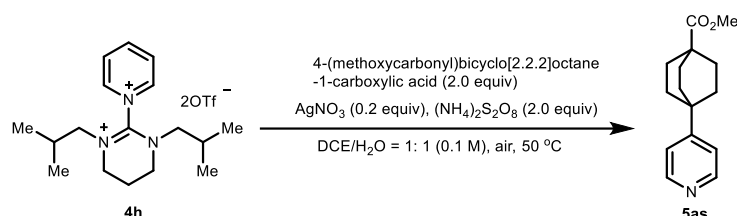

Prepared via the above procedure starting from **4h** (114.6 mg, 0.2 mmol, 1.0 equiv) and 4-(methoxycarbonyl)bicyclo[2.2.2]octane-1-carboxylic acid (84.8 mg, 0.4 mmol, 2.0 equiv) to give methyl 4-(pyridin-4-yl)bicyclo[2.2.2]octane-1-carboxylate (**5as**) as a white solid.

**R<sub>f</sub>** = 0.6 (eluent: petroleum ether/EtOAc = 2:1).

**Yield** 31.2 mg (64%).

**NMR spectroscopy:**

**<sup>1</sup>H NMR** (CDCl<sub>3</sub>, 400 MHz) δ 8.49 (d, *J* = 5.1 Hz, 2H), 7.20 (d, *J* = 5.7 Hz, 2H), 3.67 (s, 3H), 1.96 – 1.88 (m, 6H), 1.87 – 1.79 (m, 6H).

**<sup>13</sup>C NMR** (CDCl<sub>3</sub>, 101 MHz) δ 178.0, 158.2, 149.5, 121.0, 51.8, 39.0, 34.8, 31.1, 28.5.

**HRMS** calcd for (C<sub>15</sub>H<sub>20</sub>NO<sub>2</sub>)<sup>+</sup> [M + H]<sup>+</sup>: 246.1489, found 246.1487.

### 4-(1-tosylpiperidin-4-yl)pyridine (**5at**)

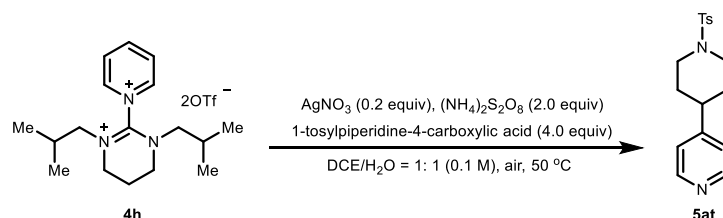

Prepared via the above procedure starting from **4h** (114.6 mg, 0.2 mmol, 1.0 equiv) and 1-tosylpiperidine-4-carboxylic acid (226.4 mg, 0.8 mmol, 4.0 equiv) to give 4-(1-tosylpiperidin-4-yl)pyridine (**5at**) as a white solid.

$R_f = 0.6$  (eluent: pure EtOAc).

**Yield** 21.1 mg (33%).

**NMR spectroscopy:**

$^1\text{H NMR}$  ( $\text{CDCl}_3$ , 400 MHz)  $\delta$  8.50 (d,  $J = 3.9$  Hz, 2H), 7.67 (d,  $J = 8.1$  Hz, 2H), 7.34 (d,  $J = 8.1$  Hz, 2H), 7.06 (d,  $J = 5.4$  Hz, 2H), 3.93 (d,  $J = 11.8$  Hz, 2H), 2.44 (s, 3H), 2.34 (td,  $J = 12.0, 2.9$  Hz, 2H), 1.95 – 1.75 (m, 5H).

$^{13}\text{C NMR}$  ( $\text{CDCl}_3$ , 101 MHz)  $\delta$  153.5, 150.1, 143.6, 133.2, 129.7, 127.8, 122.1, 46.5, 41.1, 31.7, 21.5.

**HRMS** calcd for  $(\text{C}_{17}\text{H}_{21}\text{N}_2\text{O}_2\text{S})^+$   $[\text{M} + \text{H}]^+$ : 317.1318, found 317.1319.

**4-cyclohexyl-3-fluoropyridine (5au)**

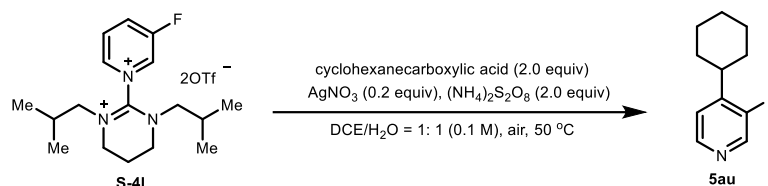

Prepared via the above procedure starting from **S-4I** (118.2 mg, 0.2 mmol, 1.0 equiv) and cyclohexanecarboxylic acid (51.4 mg, 0.4 mmol, 2.0 equiv) to give 4-cyclohexyl-3-fluoropyridine (**5au**) as a colorless oil.

$R_f = 0.5$  (eluent: petroleum ether/EtOAc = 10:1).

**Yield** 24.2 mg (68%).

**NMR spectroscopy:**

$^1\text{H NMR}$  ( $\text{CDCl}_3$ , 600 MHz)  $\delta$  8.34 (s, 1H), 8.31 (d,  $J = 5.5$  Hz, 1H), 7.16 (t,  $J = 5.5$  Hz, 1H), 2.86 (t,  $J = 8.7$  Hz, 1H), 1.89 – 1.81 (m, 4H), 1.79 – 1.73 (m, 1H), 1.46 – 1.36 (m, 4H), 1.28 – 1.22 (m, 1H).

$^{13}\text{C NMR}$  ( $\text{CDCl}_3$ , 151 MHz)  $\delta$  157.9 (d,  $J = 250.7$  Hz), 145.7 (d,  $J = 4.5$  Hz), 143.0 (d,  $J = 12.1$  Hz), 137.6 (d,  $J = 25.7$  Hz), 122.3, 36.8, 32.2, 26.4, 25.9.

$^{19}\text{F NMR}$  ( $\text{CDCl}_3$ , 565 MHz)  $\delta$  -133.7.

**HRMS** calcd for  $(\text{C}_{11}\text{H}_{15}\text{FN})^+$   $[\text{M} + \text{H}]^+$ : 180.1183, found 180.1182.

**3-chloro-4-cyclohexylpyridine (5av)**

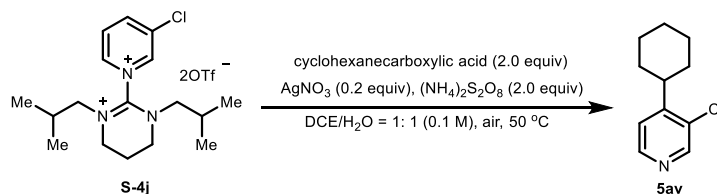

Prepared via the above procedure starting from **S-4j** (121.4 mg, 0.2 mmol, 1.0 equiv) and cyclohexanecarboxylic acid (51.4 mg, 0.4 mmol, 2.0 equiv) to give 3-chloro-4-cyclohexylpyridine (**5av**) as a pale-yellow oil.

$R_f = 0.6$  (eluent: petroleum ether/EtOAc = 10:1).

**Yield** 17.9 mg (46%).

**NMR spectroscopy:**

$^1\text{H NMR}$  ( $\text{CDCl}_3$ , 400 MHz)  $\delta$  8.48 (s, 1H), 8.38 (d,  $J = 5.1$  Hz, 1H), 7.15 (d,  $J = 5.1$  Hz, 1H), 3.01 – 2.90 (m, 1H), 1.89 – 1.82 (m, 4H), 1.81 – 1.73 (m, 1H), 1.50 – 1.17 (m, 5H).

$^{13}\text{C NMR}$  ( $\text{CDCl}_3$ , 151 MHz)  $\delta$  153.3, 149.3, 147.9, 131.6, 121.9, 40.1, 32.2, 26.5, 26.0.

HRMS calcd for  $(\text{C}_{11}\text{H}_{15}\text{ClN})^+$   $[\text{M} + \text{H}]^+$ : 196.0888, found 196.0887.

### 3-bromo-4-cyclohexylpyridine (**5aw**)

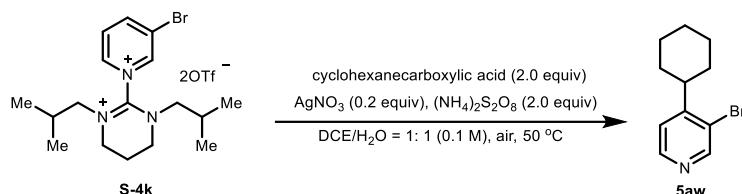

Prepared via the above procedure starting from **S-4k** (130.2 mg, 0.2 mmol, 1.0 equiv) and cyclohexanecarboxylic acid (51.4 mg, 0.4 mmol, 2.0 equiv) to give 3-bromo-4-cyclohexylpyridine (**5aw**) as a pale-yellow oil.

$R_f = 0.6$  (eluent: petroleum ether/EtOAc = 10:1).

Yield 23.6 mg (49%).

#### NMR spectroscopy:

$^1\text{H NMR}$  ( $\text{CDCl}_3$ , 400 MHz)  $\delta$  8.64 (s, 1H), 8.52 – 8.31 (br, 1H), 7.22 – 7.06 (br, 1H), 2.91 (tt,  $J = 11.3, 2.6$  Hz, 1H), 1.92 – 1.82 (m, 4H), 1.81 – 1.72 (m, 1H), 1.50 – 1.18 (m, 5H).

$^{13}\text{C NMR}$  ( $\text{CDCl}_3$ , 101 MHz)  $\delta$  154.9, 151.9, 148.5, 123.1 (low signal), 122.4, 42.9, 32.3, 26.5, 26.0.

HRMS calcd for  $(\text{C}_{11}\text{H}_{15}\text{BrN})^+$   $[\text{M} + \text{H}]^+$ : 240.0383, found 240.0381.

## 14. C-4 arylation with aryl boronic acids as the radical precursors

Following the known literature procedure for borono-minisci reaction <sup>[4]</sup>, to a 10 mL culture tube equipped with the screw cap and magnetic stir bar, the pyridinium salt **4h** (114.6 mg, 0.2 mmol, 1.0 equiv), 4-substituted aryl-boronic acid (0.3 mmol, 1.5 equiv),  $(\text{NH}_4)_2\text{S}_2\text{O}_8$  (91.3 mg, 0.4 mmol, 2.0 equiv) and  $\text{AgNO}_3$  (6.8 mg, 0.04 mmol, 20 mol%) were added, together with dichloromethane (1.0 mL) and  $\text{H}_2\text{O}$  (1.0 mL) under atmospheric conditions and stirred at room temperature for 10 h. Upon completion, the reaction was neutralized with saturated  $\text{NaHCO}_3$  aqueous solution (2.0 mL) ( $\text{pH} > 8$ ). The crude mixture was diluted by DCM (3.0 mL) and the aqueous phase was extracted with DCM ( $3 \times 3.0$  mL). Then the combined organic layers were dried over  $\text{Na}_2\text{SO}_4$ , filtered, and concentrated in vacuo. The crude material was purified on silica gel chromatography to afford C-4 arylation pyridine products **5** as a white solid. 1, 3, 5-trimethoxybenzene (2.7 mg) was used as an internal standard. The desired C-4 arylation product **5** was observed in GC-MS. The products of C-2 arylation can be observed in crude GC-MS at a ratio of less than 1:35 (C-2/C-4).

### 4-(4-ethylphenyl)pyridine (**5ax**)

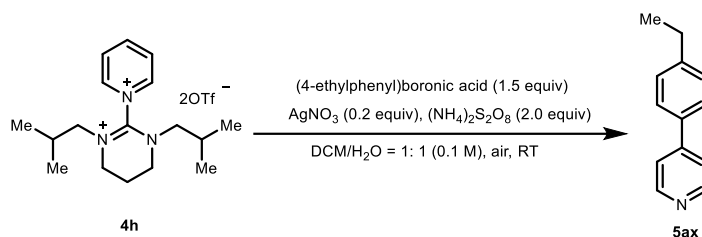

Prepared via the above procedure starting from (4-ethylphenyl)boronic acid (45.0 mg, 0.3 mmol, 1.5 equiv) to give 4-(4-ethylphenyl)pyridine (**5ax**) as a white solid.

$R_f$  = 0.6 (eluent: petroleum ether/EtOAc = 5:1).

**Yield** 23.1 mg (63%, GC-MS: C4/C2 = 61.8/1).

**NMR spectroscopy:**

$^1\text{H NMR}$  ( $\text{CDCl}_3$ , 400 MHz)  $\delta$  8.63 (d,  $J$  = 5.5 Hz, 2H), 7.57 (d,  $J$  = 8.1 Hz, 2H), 7.49 (d,  $J$  = 5.8 Hz, 2H), 7.32 (d,  $J$  = 8.0 Hz, 2H), 2.71 (q,  $J$  = 7.6 Hz, 2H), 1.28 (t,  $J$  = 7.6 Hz, 3H).

$^{13}\text{C NMR}$  ( $\text{CDCl}_3$ , 101 MHz)  $\delta$  150.1, 148.4, 145.6, 135.4, 128.7, 126.9, 121.5, 28.6, 15.5.

**HRMS** calcd for  $(\text{C}_{13}\text{H}_{14}\text{N})^+$   $[\text{M} + \text{H}]^+$ : 184.1121, found 184.1120.

**4-(4-chlorophenyl)pyridine (5ay)**

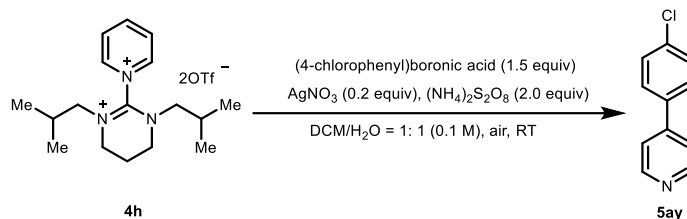

Prepared via the above procedure starting from (4-chlorophenyl)boronic acid (46.8 mg, 0.3 mmol, 1.5 equiv) to give 4-(4-chlorophenyl)pyridine (**5ay**) as a white solid.

$R_f$  = 0.4 (eluent: petroleum ether/EtOAc = 4:1).

**Yield** 29.6 mg (78%, GC-MS: C4/C2 = 67.7/1).

The NMR spectroscopy and HRMS data of **5ay** are the same as **5h**

**4-(4-(trifluoromethyl)phenyl)pyridine (5az)**

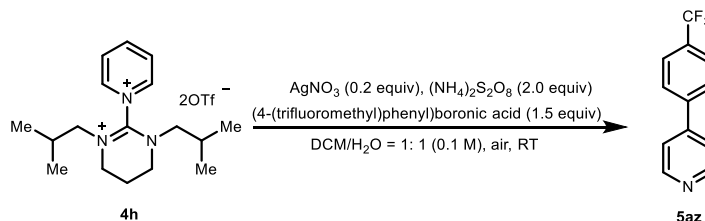

Prepared via the above procedure starting from (4-(trifluoromethyl)phenyl)boronic acid (57.0 mg, 0.3 mmol, 1.0 equiv) to give 4-(4-(trifluoromethyl)phenyl)pyridine (**5az**) as a white solid.

$R_f$  = 0.4 (eluent: petroleum ether/EtOAc = 5:1).

**Yield** 34.0 mg (76%, GC-MS: C4/C2 = 35.7/1).

**NMR spectroscopy:**

$^1\text{H NMR}$  ( $\text{CDCl}_3$ , 400 MHz)  $\delta$  8.70 (d,  $J$  = 6.1 Hz, 2H), 7.77 – 7.70 (m, 4H), 7.51 (d,  $J$  = 6.1 Hz, 2H).

$^{13}\text{C NMR}$  ( $\text{CDCl}_3$ , 151 MHz)  $\delta$  150.4, 147.0, 141.7, 131.1 (q,  $J$  = 33.2 Hz), 127.5, 126.1 (q,  $J$  = 3.0 Hz), 124.0 (q,  $J$  = 271.8 Hz), 121.8.

$^{19}\text{F NMR}$  ( $\text{CDCl}_3$ , 377 MHz)  $\delta$  -62.7.

**HRMS** calcd for  $(\text{C}_{12}\text{H}_9\text{F}_3\text{N})^+$   $[\text{M} + \text{H}]^+$ : 224.0682, found 224.0680.

**1-(4-(pyridin-4-yl)phenyl)ethan-1-one (5ba)**

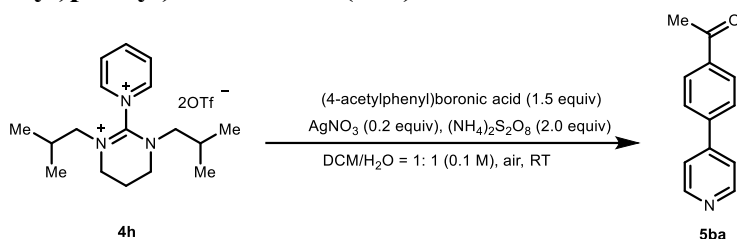

Prepared via the above procedure starting from (4-acetylphenyl)boronic acid (49.2 mg, 0.3 mmol, 1.5 equiv) to give 1-(4-(pyridin-4-yl)phenyl)ethan-1-one (**5ba**) as a white solid.

$R_f$  = 0.4 (eluent: petroleum ether/EtOAc = 1:1).

**Yield** 25.4 mg (64%, GC-MS: C4/C2 > 99/1).

**NMR spectroscopy:**

$^1\text{H NMR}$  ( $\text{CDCl}_3$ , 400 MHz)  $\delta$  8.70 (d,  $J$  = 5.2 Hz, 2H), 8.06 (d,  $J$  = 8.3 Hz, 2H), 7.72 (d,  $J$  = 8.3 Hz, 2H), 7.53 (d,  $J$  = 5.7 Hz, 2H), 2.64 (s, 3H).

$^{13}\text{C NMR}$  ( $\text{CDCl}_3$ , 101 MHz)  $\delta$  197.5, 150.3, 147.2, 142.5, 137.3, 129.1, 127.3, 121.7, 26.7.

**HRMS** calcd for  $(\text{C}_{13}\text{H}_{12}\text{NO})^+$   $[\text{M} + \text{H}]^+$ : 198.0913, found 198.0912.

**4-(naphthalen-2-yl)pyridine (5bb)**

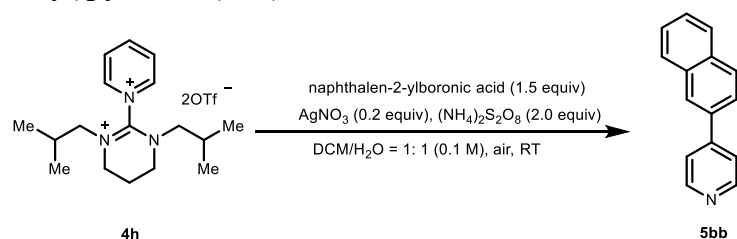

Prepared via the above procedure starting from naphthalen-2-ylboronic acid (51.6 mg, 0.3 mmol, 1.0 equiv) to give 4-(naphthalen-2-yl)pyridine (**5bb**) as a pale yellow solid.

$R_f$  = 0.5 (eluent: petroleum ether/EtOAc = 5:1).

**Yield** 24.6 mg (60%, GC-MS: C-4/C-2 > 99/1).

**NMR spectroscopy:**

$^1\text{H NMR}$  ( $\text{CDCl}_3$ , 400 MHz)  $\delta$  8.70 (d,  $J$  = 6.0 Hz, 2H), 8.12 (s, 1H), 7.96 (d,  $J$  = 8.5



Hz, 1H), 7.94 – 7.90 (m, 1H), 7.90 – 7.85 (m, 1H), 7.74 (dd,  $J = 8.5, 1.7$  Hz, 1H), 7.64 (d,  $J = 6.1$  Hz, 2H), 7.58 – 7.47 (m, 2H).

$^{13}\text{C}$  NMR ( $\text{CDCl}_3$ , 101 MHz)  $\delta$  150.2, 148.4, 135.3, 133.5, 129.0, 128.5, 127.8, 126.9, 126.8, 126.5, 124.5, 121.9.

HRMS calcd for  $(\text{C}_{15}\text{H}_{12}\text{N})^+ [\text{M} + \text{H}]^+$ : 206.0964, found 206.0963.

### 15. C-4 alkylation with functionalized alkanes as the radical precursors

A 25 mL Schlenk tube with the screw-cap was added silver nitrate (0.04 mmol, 0.2 equiv, 6.8 mg),  $\text{K}_2\text{S}_2\text{O}_8$  (0.4 mmol, 2.0 equiv, 108.0 mg) and pyridine salt (0.2 mmol, 1.0 equiv, 114.6 mg). After sealing with a screw-cap, the tube was evacuated and back-filled with nitrogen three times. Then, water (1.0 mL),  $\text{H}_2\text{SO}_4$  (18.4 mol/L, 1.0 mmol, 5.0 equiv, 54.0  $\mu\text{L}$ ) and alcohols (0.6 mmol, 3.0 equiv) were added consecutively. The resulting mixture was stirred at 50 °C using an oil bath for 4 h, after which saturated  $\text{NaHCO}_3$  solution was added until the pH of the solution was above 8. Then, EtOAc (5.0 mL) was added and mixed to obtain a biphasic mixture. After that, the organic phase was separated and collected, while the aqueous phase was extracted three more times with EtOAc ( $3 \times 5.0$  mL). The organic phase was combined, dried over  $\text{Na}_2\text{SO}_4$  and then concentrated under reduced pressure. The resulting crude mixture was purified by column chromatography on silica gel to afford C-4 alkylation pyridine products as a pale-yellow oil.

#### 4-(pyridin-4-yl)pentan-1-ol (**5bc**)

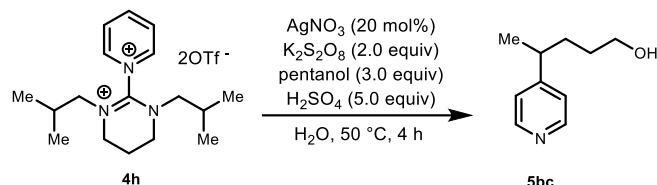

Prepared via the above procedure starting from pentanol (52.8 mg, 0.6 mmol, 3.0 equiv) to give 4-(pyridin-4-yl)pentan-1-ol (**5bc**) as a pale yellow oil.

$R_f = 0.3$  (eluent: EtOAc)

Yield 16.8 mg (51%).

$^1\text{H}$  NMR ( $\text{CDCl}_3$ , 400 MHz)  $\delta$  8.46 (br, 2H), 7.11 (d,  $J = 5.1$  Hz, 2H), 3.60 (t,  $J = 6.5$  Hz, 2H), 2.76 – 2.64 (m, 1H), 2.23 (br, 1H), 1.69 – 1.62 (m, 2H), 1.57 – 1.46 (m, 1H), 1.46 – 1.35 (m, 1H), 1.25 (d,  $J = 6.9$  Hz, 3H).

$^{13}\text{C}$  NMR ( $\text{CDCl}_3$ , 101 MHz)  $\delta$  156.6, 149.5, 123.0 (*low signal*), 62.5, 39.3, 33.7, 30.7, 21.5.

HRMS calcd for  $(\text{C}_{10}\text{H}_{16}\text{NO})^+ [\text{M} + \text{H}]^+$ : 166.1226, found 166.1225.

#### 4-methoxy-4-(pyridin-4-yl)butan-1-ol (**5bd**)

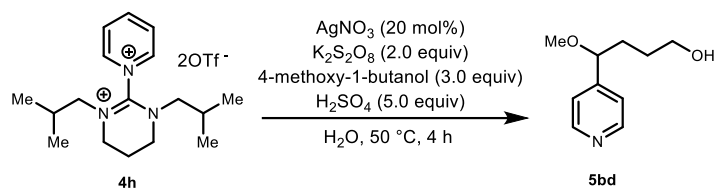

Prepared via the above procedure starting from 4-methoxy-1-butanol (62.4 mg, 0.6 mmol, 3.0 equiv) to give 4-methoxy-4-(pyridin-4-yl)butan-1-ol (**5bd**) as a pale yellow oil.

$R_f$  = 0.2 (eluent: DCM/MeOH = 30:1)

Yield 11.7 mg (32%).

$^1\text{H NMR}$  ( $\text{CDCl}_3$ , 400 MHz)  $\delta$  8.56 (d,  $J$  = 5.9 Hz, 2H), 7.43 (d,  $J$  = 6.0 Hz, 2H), 4.29 (t,  $J$  = 6.2 Hz, 1H), 3.66 (t,  $J$  = 6.1 Hz, 2H), 3.29 (s, 3H), 1.83 – 1.75 (m, 2H), 1.66 – 1.63 (m, 2H). (There is one less signal of active hydrogen on the hydroxyl group)

$^{13}\text{C NMR}$  ( $\text{CDCl}_3$ , 101 MHz)  $\delta$  151.7, 149.6, 121.7, 82.7, 62.5, 57.2, 34.4, 28.8.

HRMS calcd for  $(\text{C}_{10}\text{H}_{16}\text{NO}_2)^+$   $[\text{M} + \text{H}]^+$ : 182.1176, found 182.1175.

## 16. Late-stage functionalization of drug-like molecules.

### 2-butoxyethyl 4-pentylnicotinate (**5be**)

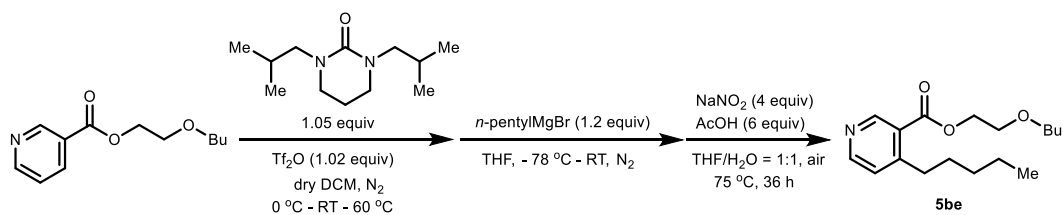

Prepared via **General Procedure III** starting from 2-butoxyethyl nicotinate (223.1 mg, 1.0 mmol, 1.0 equiv), *n*-pentyl Grignard reagents (1.2 mmol, 1.2 equiv) and oxidized at 75 °C for 36 h to give 2-butoxyethyl 4-pentylnicotinate (**5be**) as a yellow oil.

$R_f$  = 0.2 (eluent: petroleum ether/EtOAc = 10:1).

Yield 109.3 mg (37%, 44.8 mg starting material, 47% b.r.s.m).

**NMR spectroscopy:**

$^1\text{H NMR}$  ( $\text{CDCl}_3$ , 400 MHz)  $\delta$  9.04 (s, 1H), 8.55 (d,  $J$  = 4.5 Hz, 1H), 7.17 (d,  $J$  = 5.1 Hz, 1H), 4.51 – 4.42 (m, 2H), 3.78 – 3.68 (m, 2H), 3.49 (t,  $J$  = 6.6 Hz, 2H), 2.98 – 2.90 (m, 2H), 1.66 – 1.50 (m, 4H), 1.44 – 1.28 (m, 6H), 0.90 (t,  $J$  = 7.3 Hz, 3H), 0.88 (t,  $J$  = 7.3 Hz, 3H).

$^{13}\text{C NMR}$  ( $\text{CDCl}_3$ , 101 MHz)  $\delta$  166.2, 153.9, 152.1, 151.7, 125.7, 125.4, 71.3, 68.5, 64.4, 33.7, 31.8, 31.7, 30.5, 22.5, 19.3, 14.0, 13.9.

HRMS calcd for  $(\text{C}_{17}\text{H}_{28}\text{NO}_3)^+$   $[\text{M} + \text{H}]^+$ : 294.2064, found 294.2062.

### 3-(5-chloro-2-(2,4-dichlorophenoxy)phenyl)-4-pentylpyridine (**5bf**)

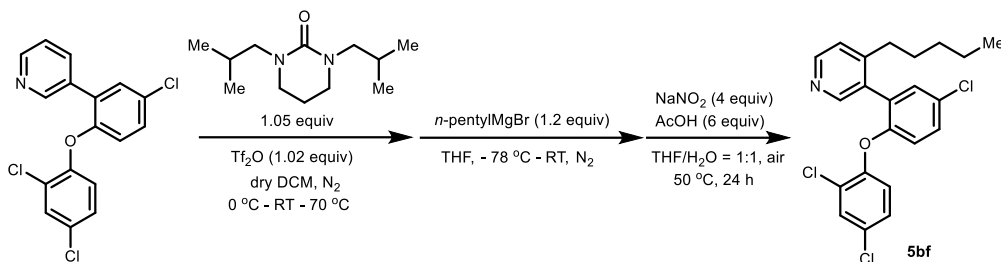

Prepared via **General Procedure III** starting from 3-(5-chloro-2-(2,4-dichlorophenoxy)phenyl)pyridine (349.0 mg, 1.0 mmol, 1.0 equiv), *n*-pentyl Grignard reagents (1.2 mmol, 1.2 equiv) and oxidized at 50 °C for 24 h to give 3-(5-chloro-2-(2,4-dichlorophenoxy)phenyl)-4-pentylpyridine (**5bf**) as a yellow oil.

**R<sub>f</sub>** = 0.3 (eluent: petroleum ether/EtOAc = 10:1).

**Yield** 194.4 mg (46%, 24.6 mg starting material, 49% b.r.s.m).

**NMR spectroscopy:**

**<sup>1</sup>H NMR** (CDCl<sub>3</sub>, 400 MHz) δ 8.46 (d, *J* = 5.0 Hz, 1H), 8.36 (s, 1H), 7.34 (s, 1H), 7.32 (d, *J* = 4.0 Hz, 1H), 7.28 (s, 1H), 7.20 (d, *J* = 5.1 Hz, 1H), 7.12 (d, *J* = 8.7 Hz, 1H), 6.81 – 6.74 (m, 2H), 2.60 (t, *J* = 8.2 Hz, 2H), 1.59 – 1.45 (m, 2H), 1.29 – 1.12 (m, 4H), 0.83 (t, *J* = 6.4 Hz, 3H).

**<sup>13</sup>C NMR** (CDCl<sub>3</sub>, 151 MHz) δ 152.4, 150.7, 150.5, 150.0, 149.2, 131.9, 131.7, 130.7, 130.5, 129.48, 129.47, 129.0, 128.0, 126.2, 123.5, 120.7, 118.8, 32.6, 31.5, 29.3, 22.3, 13.9.

**HRMS** calcd for (C<sub>22</sub>H<sub>21</sub>Cl<sub>3</sub>NO)<sup>+</sup> [M + H]<sup>+</sup>: 420.0683, found 420.0678.

**(*R*)-2,5,7,8-tetramethyl-2-((4*R*,8*R*)-4,8,12-trimethyltridecyl)chroman-6-yl 4-pentynicotinate (**5bg**)**

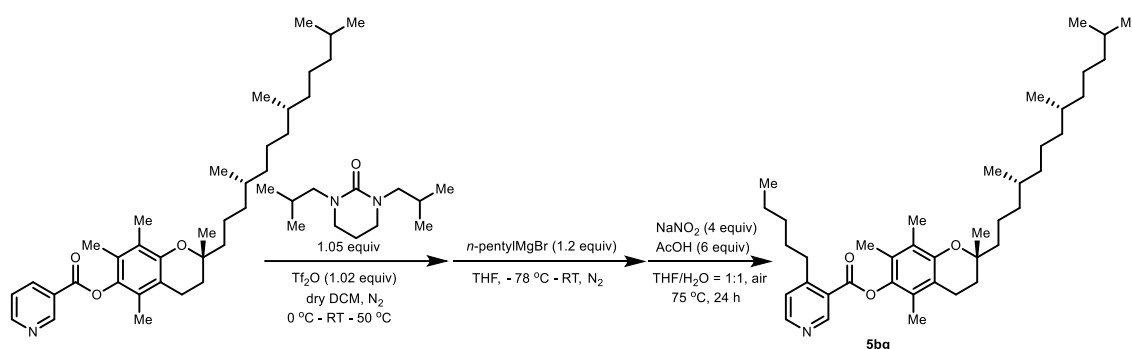

Prepared via **General Procedure III** starting from (*R*)-2,5,7,8-tetramethyl-2-((4*R*,8*R*)-4,8,12-trimethyltridecyl)chroman-6-yl nicotinate (535.4 mg, 1.0 mmol, 1.0 equiv), *n*-pentyl Grignard reagents (1.2 mmol, 1.2 equiv) and oxidized at 75 °C for 24 h to give (*R*)-2,5,7,8-tetramethyl-2-((4*R*,8*R*)-4,8,12-trimethyltridecyl)chroman-6-yl 4-pentynicotinate (**5bg**) as a pale yellow oil.

**R<sub>f</sub>** = 0.5 (eluent: petroleum ether/EtOAc = 10:1).

**Yield** 208.3 mg (34%, 203.5 mg starting material, 55% b.r.s.m).

**NMR spectroscopy:**

**<sup>1</sup>H NMR** (Actone-*d*<sub>6</sub>, 600 MHz) δ 9.32 (s, 1H), 8.68 (d, *J* = 5.1 Hz, 1H), 7.43 (d, *J* = 5.1 Hz, 1H), 3.11 – 3.05 (m, 2H), 2.67 (t, *J* = 6.7 Hz, 2H), 2.13 (s, 3H), 2.08 (s, 3H), 2.05 (s, 3H), 1.91 – 1.76 (m, 2H), 1.69 – 1.50 (m, 7H), 1.48 – 1.30 (m, 14H), 1.28 (s, 3H), 1.20 – 1.08 (m, 6H), 0.95 – 0.83 (m, 15H).

**<sup>13</sup>C NMR** (Actone-*d*<sub>6</sub>, 151 MHz) δ 165.2, 155.3, 153.9, 152.7, 150.5, 141.8, 127.8, 126.9, 126.3, 126.0, 123.7, 118.8, 76.1, 40.4, 38.6, 38.5, 38.42, 38.35, 38.3, 34.4, 33.74, 33.66, 32.8, 32.1, 31.9, 28.9, 25.8, 25.4, 25.3, 23.4, 23.3, 23.2, 22.0, 21.4, 20.4, 20.3, 14.5, 13.6, 12.8, 12.3.

**HRMS** calcd for (C<sub>40</sub>H<sub>64</sub>NO<sub>3</sub>)<sup>+</sup> [M + H]<sup>+</sup>: 606.4881, found 606.4872.

**(*S*)-3-(4-chloro-3-(4-((tetrahydrofuran-3-yl)oxy)benzyl)phenyl)-4-pentylpyridine (5bh)**

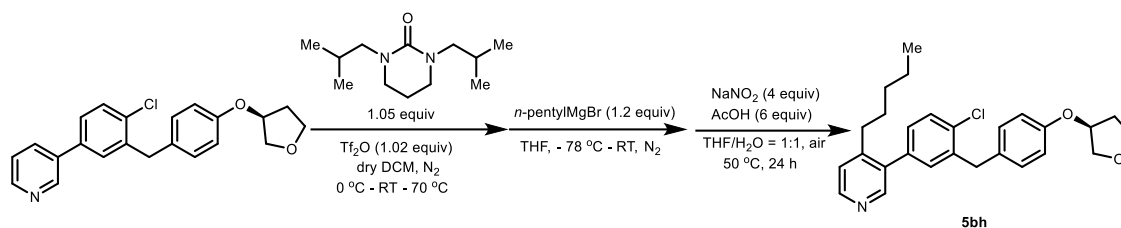

Prepared via **General Procedure III** starting from (*S*)-3-(4-chloro-3-(4-((tetrahydrofuran-3-yl)oxy)benzyl)phenyl)pyridine (365.1 mg, 1.0 mmol, 1.0 equiv), *n*-pentyl Grignard reagents (1.2 mmol, 1.2 equiv) and oxidized at 50 °C for 24 h to give (*S*)-3-(4-chloro-3-(4-((tetrahydrofuran-3-yl)oxy)benzyl)phenyl)-4-pentylpyridine (**5bh**) as a pale yellow oil.

**R<sub>f</sub>** = 0.6 (eluent: petroleum ether/EtOAc = 2:1).

**Yield** 245.9 mg (57%, 131.2 mg starting material, 89% b.r.s.m).

**NMR spectroscopy:**

**<sup>1</sup>H NMR** (CDCl<sub>3</sub>, 600 MHz) δ 8.46 (d, *J* = 4.3 Hz, 1H), 8.34 (s, 1H), 7.44 (d, *J* = 8.1 Hz, 1H), 7.17 (d, *J* = 4.8 Hz, 1H), 7.11 (d, *J* = 8.3 Hz, 2H), 7.09 (d, *J* = 9.2 Hz, 1H), 7.06 (s, 1H), 6.78 (d, *J* = 8.3 Hz, 2H), 4.90 – 4.86 (m, 1H), 4.08 (s, 2H), 4.03 – 3.93 (m, 3H), 3.91 – 3.70 (m, 1H), 2.55 – 2.42 (m, 2H), 2.22 – 2.09 (m, 2H), 1.43 (p, *J* = 7.5 Hz, 2H), 1.24 – 1.12 (m, 4H), 0.82 (t, *J* = 7.0 Hz, 3H).

**<sup>13</sup>C NMR** (CDCl<sub>3</sub>, 151 MHz) δ 156.0, 150.0, 149.2, 148.6, 139.2, 136.7, 136.5, 133.7, 131.8, 131.5, 130.0, 129.5, 128.5, 124.0, 115.4, 77.3, 73.1, 67.2, 38.3, 33.0, 32.3, 31.5, 29.9, 22.3, 13.9.

**HRMS** calcd for (C<sub>27</sub>H<sub>31</sub>ClNO<sub>2</sub>)<sup>+</sup> [M + H]<sup>+</sup>: 436.2038, found 436.2034.

**ethyl 1,2-dimethyl-5-(4-pentylpyridin-3-yl)-1*H*-indole-3-carboxylate (5bi)**

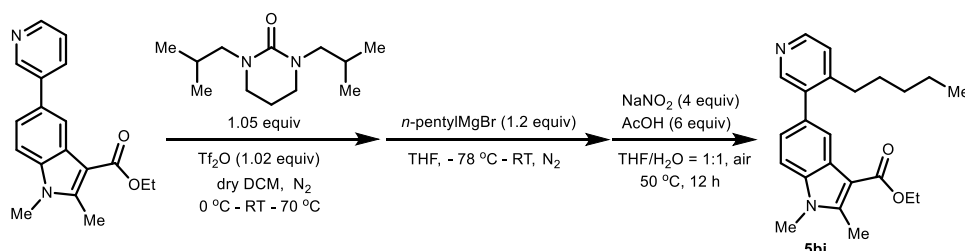

Prepared via **General Procedure III** starting from ethyl 1,2-dimethyl-5-(pyridin-3-yl)-1*H*-indole-3-carboxylate (294.1 mg, 1.0 mmol, 1.0 equiv), *n*-pentyl Grignard reagents (1.2 mmol, 1.2 equiv) and oxidized at 50 °C for 12 h to give ethyl 1,2-dimethyl-5-(4-pentylpyridin-3-yl)-1*H*-indole-3-carboxylate (**5bi**) as a white solid.

$R_f$  = 0.6 (eluent: petroleum ether/EtOAc = 2:1).

**Yield** 171.3 mg (47%, 94.1 mg starting material, 69% b.r.s.m).

**NMR spectroscopy:**

$^1\text{H NMR}$  ( $\text{CDCl}_3$ , 400 MHz)  $\delta$  8.48 (s, 1H), 8.47 (d,  $J$  = 5.2 Hz, 1H), 8.06 (s, 1H), 7.34 (d,  $J$  = 8.3 Hz, 1H), 7.21 (d,  $J$  = 5.1 Hz, 1H), 7.15 (dd,  $J$  = 8.3, 1.5 Hz, 1H), 4.37 (q,  $J$  = 7.1 Hz, 2H), 3.73 (s, 3H), 2.79 (s, 3H), 2.73 – 2.51 (m, 2H), 1.52 (p,  $J$  = 7.4 Hz, 2H), 1.39 (t,  $J$  = 7.1 Hz, 3H), 1.23 – 1.06 (m, 4H), 0.78 (t,  $J$  = 6.8 Hz, 3H).

$^{13}\text{C NMR}$  ( $\text{CDCl}_3$ , 101 MHz)  $\delta$  166.0, 150.7, 149.5, 147.9, 146.0, 138.7, 135.9, 131.4, 126.6, 123.8, 123.5, 122.3, 108.9, 104.2, 59.4, 32.4, 31.5, 30.0, 29.7, 22.3, 14.7, 13.9, 11.9.

**HRMS** calcd for  $(\text{C}_{23}\text{H}_{29}\text{N}_2\text{O}_2)^+$   $[\text{M} + \text{H}]^+$ : 365.2224, found 365.2221.

**(4-pentylpyridin-3-yl)methyl 3-(4,5-diphenyloxazol-2-yl)propanoate (5bj)**

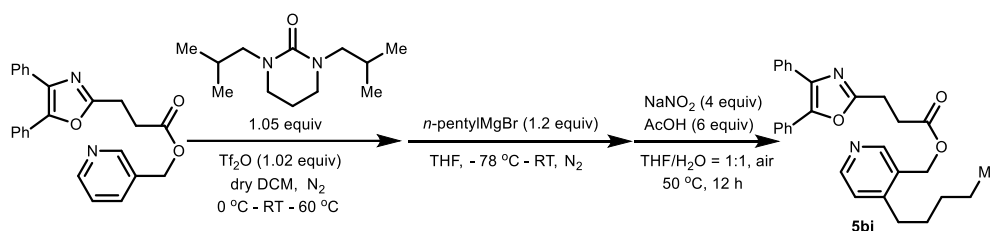

Prepared via **General Procedure III** starting from pyridin-3-ylmethyl 3-(4,5-diphenyloxazol-2-yl)propanoate (384.1 mg, 1.0 mmol, 1.0 equiv), *n*-pentyl Grignard reagents (1.2 mmol, 1.2 equiv) and oxidized at 50 °C for 12 h to give (4-pentylpyridin-3-yl)methyl 3-(4,5-diphenyloxazol-2-yl)propanoate (**5bj**) as a yellow oil.

$R_f$  = 0.3 (eluent: petroleum ether/EtOAc = 3:1).

**Yield** 123.8 mg (27%, 160.0 mg starting material, 47% b.r.s.m).

**NMR spectroscopy:**

$^1\text{H NMR}$  ( $\text{CDCl}_3$ , 600 MHz)  $\delta$  8.53 (s, 1H), 8.46 (d,  $J$  = 5.0 Hz, 1H), 7.60 (d,  $J$  = 7.0 Hz, 2H), 7.54 (d,  $J$  = 6.9 Hz, 2H), 7.40 – 7.27 (m, 6H), 7.11 (d,  $J$  = 5.0 Hz, 1H), 5.21 (s, 2H), 3.19 (t,  $J$  = 7.5 Hz, 2H), 2.95 (t,  $J$  = 7.5 Hz, 2H), 2.65 – 2.51 (m, 2H), 1.66 – 1.54 (m, 2H), 1.34 – 1.28 (m, 4H), 0.88 (t,  $J$  = 6.6 Hz, 3H).

$^{13}\text{C NMR}$  ( $\text{CDCl}_3$ , 101 MHz)  $\delta$  171.7, 161.5, 151.2, 150.8, 150.0, 145.5, 135.2, 132.4, 129.3, 129.0, 128.7, 128.6, 128.5, 128.1, 127.9, 126.5, 124.1, 62.2, 31.8, 31.7, 31.1, 29.9, 23.5, 22.5, 14.0.

**HRMS** calcd for  $(\text{C}_{29}\text{H}_{31}\text{N}_2\text{O}_3)^+$   $[\text{M} + \text{H}]^+$ : 455.2329, found 455.2325.

**(4-pentylpyridin-3-yl)methyl 2-(3-cyano-4-isobutoxyphenyl)-4-methylthiazole-5-carboxylate (5bk)**

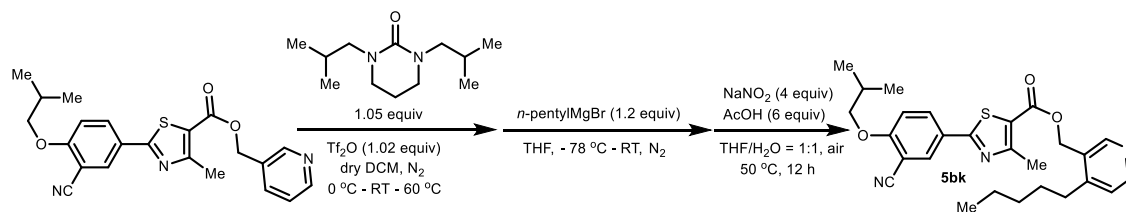

Prepared via **General Procedure III** starting from pyridin-3-ylmethyl 2-(3-cyano-4-isobutoxyphenyl)-4-methylthiazole-5-carboxylate (407.1 mg, 1.0 mmol, 1.0 equiv), *n*-pentyl Grignard reagents (1.2 mmol, 1.2 equiv) and oxidized at 50 °C for 12 h to give (4-pentylpyridin-3-yl) methyl 2-(3-cyano-4-isobutoxyphenyl)-4-methylthiazole-5-carboxylate (**5bk**) as a white solid.

**R<sub>f</sub>** = 0.3 (eluent: petroleum ether/EtOAc = 2:1).

**Yield** 120.7 mg (25%, 204.8 mg starting material, 50% b.r.s.m).

**NMR spectroscopy:**

**<sup>1</sup>H NMR** (CDCl<sub>3</sub>, 600 MHz) δ 8.62 (s, 1H), 8.51 (d, *J* = 4.9 Hz, 1H), 8.16 (d, *J* = 1.9 Hz, 1H), 8.06 (dd, *J* = 8.8, 1.9 Hz, 1H), 7.19 (d, *J* = 4.9 Hz, 1H), 7.00 (d, *J* = 8.9 Hz, 1H), 5.38 (s, 2H), 3.89 (d, *J* = 6.4 Hz, 2H), 2.76 (s, 3H), 2.74 – 2.68 (m, 2H), 2.25 – 2.15 (m, 1H), 1.68 – 1.58 (m, 2H), 1.38 – 1.28 (m, 4H), 1.08 (d, *J* = 6.7 Hz, 6H), 0.89 (t, *J* = 7.0 Hz, 3H).

**<sup>13</sup>C NMR** (CDCl<sub>3</sub>, 151 MHz) δ 167.6, 162.6, 162.1, 161.6, 151.5, 150.5, 149.8, 132.6, 132.1, 129.2, 125.9, 124.2, 120.9, 115.3, 112.7, 103.1, 75.7, 62.4, 31.9, 31.7, 29.9, 28.2, 22.5, 19.0, 17.6, 14.0.

**HRMS** calcd for (C<sub>27</sub>H<sub>32</sub>N<sub>3</sub>O<sub>3</sub>S)<sup>+</sup> [M + H]<sup>+</sup>: 478.2159, found 478.2153.

**ethyl 4-(8-chloro-4-pentyl-5,6-dihydro-11*H*-benzo[5,6]cyclohepta[1,2-*b*]pyridin-11-ylidene)piperidine-1-carboxylate (5bl)**

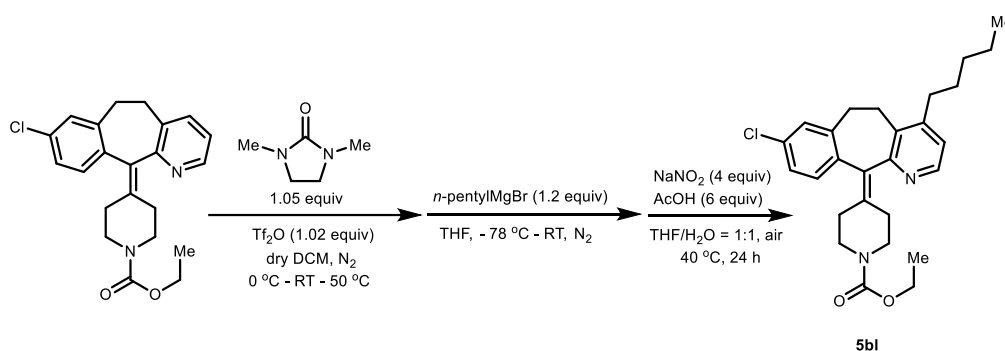

Prepared via **General Procedure III** starting from 1,3-dimethylimidazolidin-2-one (119.7 mg, 1.05 mmol, 1.05 equiv), ethyl 4-(8-chloro-5,6-dihydro-11*H*-benzo[5,6]cyclohepta[1,2-*b*]pyridin-11-ylidene)piperidine-1-carboxylate (382.1 mg, 1.0 mmol, 1.0 equiv), *n*-pentyl Grignard reagents (1.2 mmol, 1.2 equiv) and oxidized at 40 °C for 24 h to give ethyl 4-(8-chloro-4-pentyl-5,6-dihydro-11*H*-benzo[5,6]cyclohepta[1,2-*b*]pyridin-11-ylidene)piperidine-1-carboxylate (**5bl**) as a pale yellow oil.

R<sub>f</sub> = 0.3 (eluent: petroleum ether/EtOAc = 2:1).

Yield 261.4 mg (58%, 75.7 mg starting material, 72% b.r.s.m).

**NMR spectroscopy:**

<sup>1</sup>H NMR (CDCl<sub>3</sub>, 400 MHz) δ 8.24 (d, *J* = 5.0 Hz, 1H), 7.13 – 7.01 (m, 3H), 6.93 (d, *J* = 5.0 Hz, 1H), 4.09 (q, *J* = 7.1 Hz, 2H), 3.83 – 3.69 (br, 2H), 3.42 – 3.32 (m, 1H), 3.24 – 3.04 (m, 3H), 2.95 – 2.85 (m, 1H), 2.83 – 2.72 (m, 1H), 2.60 – 2.51 (m, 2H), 2.42 – 2.30 (m, 3H), 2.24 – 2.14 (m, 1H), 1.60 – 1.47 (m, 2H), 1.37 – 1.28 (m, 4H), 1.20 (t, *J* = 7.1 Hz, 3H), 0.86 (t, *J* = 6.7 Hz, 3H).

<sup>13</sup>C NMR (CDCl<sub>3</sub>, 101 MHz) δ 158.4, 155.5, 149.9, 146.5, 139.2, 136.7, 136.4, 134.8, 132.8, 131.5, 130.9, 129.4, 126.0, 123.0, 61.3, 44.8, 44.7 (both carbons in the nitrogen ortho position on the piperidine ring have signals), 32.5, 31.9, 31.8, 30.6, 29.6, 26.5, 22.5, 14.7, 14.0.

HRMS calcd for (C<sub>27</sub>H<sub>34</sub>ClN<sub>2</sub>O<sub>2</sub>)<sup>+</sup> [M + H]<sup>+</sup>: 453.2304, found 453.2302.

**pyridin-3-ylmethyl 2-(11-oxo-6,11-dihydrodibenzo[*b,e*]oxepin-2-yl)acetate (5bm)**

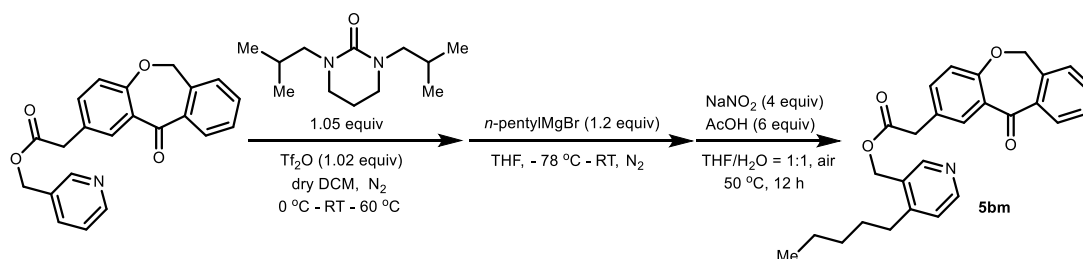

Prepared via **General Procedure III** starting from pyridin-3-ylmethyl 2-(11-oxo-6,11-dihydrodibenzo[*b,e*]oxepin-2-yl)acetate (359.1 mg, 1.0 mmol, 1.0 equiv), *n*-pentyl Grignard reagents (1.2 mmol, 1.2 equiv) and oxidized at 50 °C for 12 h to give (4-pentylpyridin-3-yl)methyl 2-(11-oxo-6,11-dihydrodibenzo[*b,e*]oxepin-2-yl)acetate (**5bm**) as a pale yellow oil.

R<sub>f</sub> = 0.4 (eluent: petroleum ether/EtOAc = 2:1).

Yield 120.1 mg (28%, 165.1 mg starting material, 52% b.r.s.m).

**NMR spectroscopy:**

<sup>1</sup>H NMR (CDCl<sub>3</sub>, 400 MHz) δ 8.49 (s, 1H), 8.45 (d, *J* = 5.0 Hz, 1H), 8.09 (d, *J* = 2.3 Hz, 1H), 7.89 – 7.83 (m, 1H), 7.54 (td, *J* = 7.4, 1.3 Hz, 1H), 7.45 (td, *J* = 7.6, 1.1 Hz, 1H), 7.39 (dd, *J* = 8.4, 2.4 Hz, 1H), 7.34 (d, *J* = 7.4 Hz, 1H), 7.12 (d, *J* = 5.1 Hz, 1H), 7.01 (d, *J* = 8.4 Hz, 1H), 5.17 (s, 2H), 5.16 (s, 2H), 3.66 (s, 2H), 2.65 – 2.54 (m, 2H), 1.62 – 1.51 (m, 2H), 1.35 – 1.24 (m, 4H), 0.91 – 0.78 (m, 3H).

<sup>13</sup>C NMR (CDCl<sub>3</sub>, 101 MHz) δ 190.7, 171.0, 160.6, 151.2, 150.5, 149.8, 140.4, 136.2, 135.5, 132.8, 132.5, 129.5, 129.30, 129.27, 127.8, 127.4, 125.2, 124.0, 121.2, 73.6, 62.3, 40.1, 31.7, 31.6, 29.7, 22.5, 13.9.

HRMS calcd for (C<sub>27</sub>H<sub>28</sub>NO<sub>4</sub>)<sup>+</sup> [M + H]<sup>+</sup>: 430.2013, found 430.2003.

**(4-pentylpyridin-3-yl)methyl 4-(*N,N*-dipropylsulfamoyl)benzoate (5bn)**

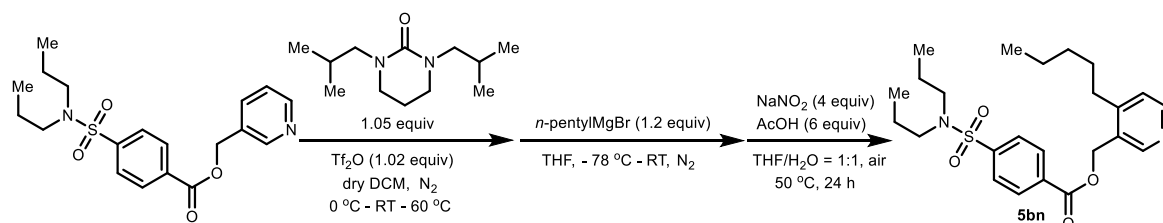

Prepared via **General Procedure III** starting from pyridin-3-ylmethyl 4-(*N,N*-dipropylsulfamoyl)benzoate (376.1 mg, 1.0 mmol, 1.0 equiv), *n*-pentyl Grignard reagents (1.2 mmol, 1.2 equiv) and oxidized at 50 °C for 12 h to give (4-pentylpyridin-3-yl)methyl 4-(*N,N*-dipropylsulfamoyl)benzoate (**5bn**) as a yellow oil.

$R_f$  = 0.3 (eluent: petroleum ether/EtOAc = 3:1).

**Yield** 177.1 mg (40%, 141.6 mg starting material, 64% b.r.s.m).

**NMR spectroscopy:**

$^1\text{H NMR}$  ( $\text{CDCl}_3$ , 400 MHz)  $\delta$  8.62 (s, 1H), 8.50 (d,  $J$  = 5.0 Hz, 1H), 8.13 (d,  $J$  = 8.4 Hz, 2H), 7.85 (d,  $J$  = 8.4 Hz, 2H), 7.18 (d,  $J$  = 5.1 Hz, 1H), 5.43 (s, 2H), 3.12 – 3.04 (m, 4H), 2.73 – 2.66 (m, 2H), 1.67 – 1.57 (m, 2H), 1.56 – 1.46 (m, 4H), 1.36 – 1.26 (m, 4H), 0.84 (t,  $J$  = 7.4 Hz, 9H).

$^{13}\text{C NMR}$  ( $\text{CDCl}_3$ , 101 MHz)  $\delta$  165.0, 151.4, 150.9, 150.1, 144.7, 133.1, 130.4, 129.2, 127.2, 124.3, 62.9, 50.0, 32.0, 31.8, 30.1, 22.6, 22.0, 14.0, 11.2.

**HRMS** calcd for  $(\text{C}_{24}\text{H}_{35}\text{N}_2\text{O}_4\text{S})^+$   $[\text{M} + \text{H}]^+$ : 447.2312, found 447.2309.

**(4-pentylpyridin-3-yl)methyl 5-(4-chlorophenyl)-1-(2,4-dichlorophenyl)-4-methyl-1H-pyrazole-3-carboxylate** (**5bo**)

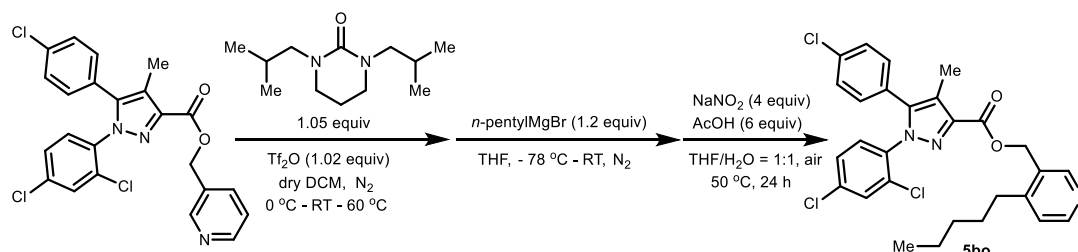

Prepared via **General Procedure III** starting from pyridin-3-ylmethyl 5-(4-chlorophenyl)-1-(2,4-dichlorophenyl)-4-methyl-1H-pyrazole-3-carboxylate (471.0 mg, 1.0 mmol, 1.0 equiv), *n*-pentyl Grignard reagents (1.2 mmol, 1.2 equiv) and oxidized at 50 °C for 12 h to give (4-pentylpyridin-3-yl)methyl 5-(4-chlorophenyl)-1-(2,4-dichlorophenyl)-4-methyl-1H-pyrazole-3-carboxylate (**5bo**) as a pale yellow oil.

$R_f$  = 0.3 (eluent: petroleum ether/EtOAc = 3:1).

**Yield** 245.1 mg (45%, 119.6 mg starting material, 60% b.r.s.m).

**NMR spectroscopy:**

$^1\text{H NMR}$  ( $\text{CDCl}_3$ , 400 MHz)  $\delta$  8.67 (s, 1H), 8.48 (d,  $J$  = 5.1 Hz, 1H), 7.39 (d,  $J$  = 2.1 Hz, 1H), 7.34 – 7.26 (m, 4H), 7.15 (d,  $J$  = 5.1 Hz, 1H), 7.07 (d,  $J$  = 8.4 Hz, 2H), 5.48 (s, 2H), 2.81 – 2.69 (m, 2H), 2.31 (s, 3H), 1.65 (p,  $J$  = 7.6 Hz, 2H), 1.39 – 1.28 (m, 4H), 0.86 (t,  $J$  = 7.0 Hz, 3H).



$^{13}\text{C}$  NMR ( $\text{CDCl}_3$ , 151 MHz)  $\delta$  162.4, 151.1, 150.7, 149.7, 143.0, 142.4, 136.1, 135.8, 135.1, 133.0, 130.9, 130.6, 130.2, 129.5, 128.9, 127.8, 126.9, 124.1, 119.3, 62.0, 32.0, 31.7, 29.8, 22.5, 13.9, 9.7.

HRMS calcd for  $(\text{C}_{28}\text{H}_{27}\text{Cl}_3\text{N}_3\text{O}_2)^+$   $[\text{M} + \text{H}]^+$ : 542.1164, found 542.1159.

## 17. Synthesis of 4-(1-tosylpiperidin-4-yl)picolinamide (8)

### 4-(1-tosylpiperidin-4-yl)picolinamide (8)

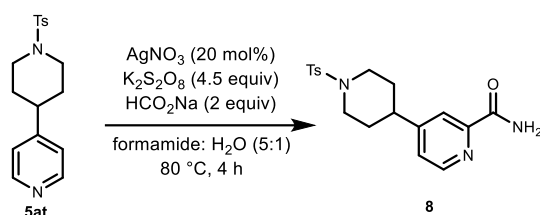

Follow the literature procedure<sup>[5]</sup>.

To a 10 mL culture tube equipped with the screw cap and magnetic stir bar,  $\text{AgNO}_3$  (7.2 mg, 0.04 mmol, 20 mol%),  $\text{K}_2\text{S}_2\text{O}_8$  (81.1 mg, 0.3 mmol, 1.5 equiv),  $\text{HCO}_2\text{Na}$  (27.2 mg, 0.4 mmol, 2.0 equiv) and corresponding pyridine **5at** (63.2 mg, 0.2 mmol, 1.0 equiv) were added, together with formamide (1 mL), and  $\text{H}_2\text{O}$  (0.2 mL). While the resulting mixture was stirred at  $80\text{ }^\circ\text{C}$  other 2 portions of  $\text{K}_2\text{S}_2\text{O}_8$  ( $2 \times 81.1$  mg, 0.3 mmol, 1.5 equiv) were added after 1 hour and 2 hours. The mixture was then stirred at the same temperature for another 2 hours. At the end of the reaction, the reaction mixture was cooled to room temperature, poured into a brine (7.0 mL) and extracted with EtOAc ( $3 \times 7.0$  mL). The organic phases were combined, evaporated in a rotary evaporator. The residue was purified by flash column chromatography on silica gel (EtOAc) to afford the corresponding product **8** as a white solid.

$R_f$  = 0.6 (eluent: EtOAc).

Yield 48.9 mg (68%).

#### NMR spectroscopy:

$^1\text{H}$  NMR ( $\text{CDCl}_3$ , 400 MHz)  $\delta$  8.49 (d,  $J$  = 5.0 Hz, 1H), 8.02 (s, 1H), 7.92 – 7.82 (br, 1H), 7.68 (d,  $J$  = 8.0 Hz, 2H), 7.35 (d,  $J$  = 8.0 Hz, 2H), 7.26 – 7.24 (m, 1H), 5.72 – 5.59 (br, 1H), 3.99 – 3.92 (m, 2H), 2.58 – 2.47 (m, 1H), 2.46 (s, 3H), 2.38 (td,  $J$  = 11.9, 3.0 Hz, 2H), 1.97 – 1.78 (m, 4H).

$^{13}\text{C}$  NMR ( $\text{CDCl}_3$ , 101 MHz)  $\delta$  166.5, 155.4, 149.7, 148.6, 143.7, 133.2, 129.7, 127.7, 124.5, 121.3, 46.4, 41.2, 31.6, 21.6.

HRMS calcd for  $(\text{C}_{18}\text{H}_{22}\text{N}_3\text{O}_3\text{S})^+$   $[\text{M} + \text{H}]^+$ : 360.1376, found 360.1375.

## 18. Synthesis of VU6001966

### 3-fluoro-4-(4-fluorophenyl)pyridine (11)

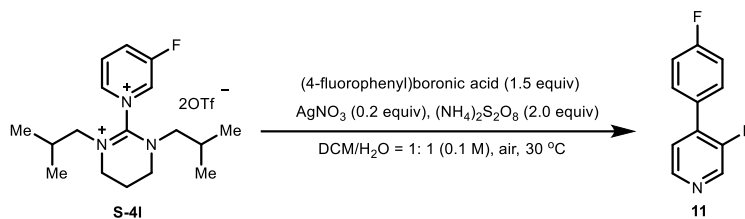

Prepared via the previous procedure starting from **S-4I** (295.5 mg, 0.5 mmol, 1.0 equiv) to give 3-fluoro-4-(4-fluorophenyl)pyridine (**11**) as a white solid.

$R_f$  = 0.3 (eluent: petroleum ether/EtOAc = 5:1).

**Yield** 58.3 mg (61%).

**NMR spectroscopy:**

$^1\text{H NMR}$  ( $\text{CDCl}_3$ , 600 MHz)  $\delta$  8.54 (s, 1H), 8.47 (d,  $J$  = 4.7 Hz, 1H), 7.63 – 7.58 (m, 2H), 7.38 (t,  $J$  = 5.8 Hz, 1H), 7.19 (t,  $J$  = 8.5 Hz, 2H).

$^{13}\text{C NMR}$  ( $\text{CDCl}_3$ , 151 MHz)  $\delta$  163.4 (d,  $J$  = 250.7 Hz), 156.6 (d,  $J$  = 256.7 Hz), 145.9 (d,  $J$  = 4.5 Hz), 139.0 (d,  $J$  = 25.7 Hz), 135.2 (d,  $J$  = 10.6 Hz), 130.8 (dd,  $J$  = 9.1, 4.5 Hz), 128.9 (d,  $J$  = 3.0 Hz), 124.1, 116.0 (d,  $J$  = 21.1 Hz).

$^{19}\text{F NMR}$  ( $\text{CDCl}_3$ , 377 MHz)  $\delta$  -111.5, -132.9.

**HRMS** calcd for  $(\text{C}_{11}\text{H}_8\text{F}_2\text{N})^+$   $[\text{M} + \text{H}]^+$ : 192.0619, found 192.0618.

#### 4-(4-fluorophenyl)-3-((1-methyl-1H-pyrazol-3-yl)methoxy)pyridine (**13**)

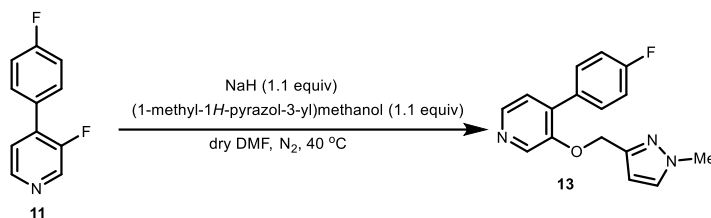

An oven-dried and  $\text{N}_2$  flushed 10 mL Schlenk-tube equipped with the screw cap and magnetic stirring bar, was charged with the corresponding diethyl (1-methyl-1H-pyrazol-3-yl)methanol (0.22 mmol, 24.6 mg, 1.1 equiv), dry DMF (1.0 mL) and NaH (0.122 mmol, 8.8 mg, 1.1 equiv). The reaction mixture was stirred at room temperature for 10 minutes. Then **11** (0.2 mmol, 38.2 mg, 1.0 equiv) was dissolved in dry DMF (1.0 mL) and added to the mixture. The resulting mixture was stirred at 40 °C for 10 h and monitored by TLC. Water (6.0 mL) was added in one portion and the mixture was extracted with EtOAc ( $5 \times 6.0$  mL). The combined organic layers were washed with brine, dried over anhydrous  $\text{Na}_2\text{SO}_4$ , filtered, and concentrated under reduced pressure. The residue was purified by column chromatography on silica gel to afford 4-(4-fluorophenyl)-3-((1-methyl-1H-pyrazol-3-yl)methoxy)pyridine (**13**) as a white solid.

$R_f$  = 0.28 (eluent: Pure EtOAc, 1%  $\text{Et}_3\text{N}$ ).

**Yield** 37.5 mg (66%).

**NMR spectroscopy:**

$^1\text{H NMR}$  ( $\text{CDCl}_3$ , 400 MHz)  $\delta$  8.50 (s, 1H), 8.30 (d,  $J$  = 4.7 Hz, 1H), 7.59 (dd,  $J$  = 8.7, 5.5 Hz, 2H), 7.29 (d,  $J$  = 2.1 Hz, 1H), 7.24 (d,  $J$  = 4.8 Hz, 1H), 7.10 (t,  $J$  = 8.7 Hz, 2H),

6.19 (d,  $J = 2.1$  Hz, 1H), 5.15 (s, 2H), 3.87 (s, 3H).

$^{13}\text{C}$  NMR ( $\text{CDCl}_3$ , 101 MHz)  $\delta$  162.8 (d,  $J = 248.5$  Hz), 151.8, 147.8, 143.1, 137.4, 136.6, 131.6 (d,  $J = 3.0$  Hz), 131.13, 131.09 (d,  $J = 8.0$  Hz), 124.3, 115.2 (d,  $J = 22.2$  Hz), 105.2, 65.7, 38.9.

$^{19}\text{F}$  NMR ( $\text{CDCl}_3$ , 377 MHz)  $\delta$  -113.4.

HRMS calcd for  $(\text{C}_{16}\text{H}_{15}\text{FN}_3\text{O})^+$   $[\text{M} + \text{H}]^+$ : 284.1194, found 284.1193.

#### 4-(4-fluorophenyl)-5-((1-methyl-1H-pyrazol-3-yl)methoxy)picolinamide VU6001966

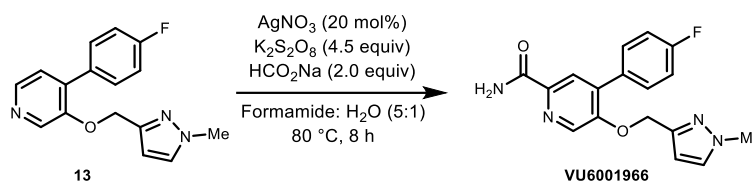

To a 10 mL culture tube equipped with the screw cap and magnetic stir bar,  $\text{AgNO}_3$  (3.6 mg, 0.02 mmol, 20 mol%),  $\text{K}_2\text{S}_2\text{O}_8$  (40.5 mg, 0.15 mmol, 1.5 equiv),  $\text{HCO}_2\text{Na}$  (13.6 mg, 0.2 mmol, 2 equiv) and corresponding pyridine **13** (28.3 mg, 0.1 mmol, 1.0 equiv) were added, together with formamide (1.0 mL) and  $\text{H}_2\text{O}$  (0.2 mL). While the resulting mixture was stirred at  $80^\circ\text{C}$  other 2 portions of  $\text{K}_2\text{S}_2\text{O}_8$  (40.5 mg, 0.15 mmol, 1.5 equiv) were added after 1 hour and 2 hours. The mixture was then stirred at the same temperature for another 6 hours. At the end of the reaction, the reaction mixture was cooled to room temperature, poured into a brine (4.0 mL), and extracted with EtOAc ( $3 \times 5.0$  mL). The organic phases were combined, evaporated in a rotary evaporator. The residue was purified by column chromatography on silica gel to afford the corresponding product 4-(4-fluorophenyl)-5-((1-methyl-1H-pyrazol-3-yl)methoxy)picolinamide (**VU6001966**) as a white solid.

$R_f = 0.3$  (eluent: Pure EtOAc, 1%  $\text{Et}_3\text{N}$ ).

**Yield** 11.0 mg (34%).

#### NMR spectroscopy:

$^1\text{H}$  NMR ( $\text{CDCl}_3$ , 600 MHz)  $\delta$  8.44 (s, 1H), 8.19 (s, 1H), 7.78 – 7.72 (br, 1H), 7.66 – 7.60 (m, 2H), 7.32 (s, 1H), 7.11 (t,  $J = 8.5$  Hz, 2H), 6.22 (s, 1H), 5.66 – 5.59 (br, 1H), 5.25 (s, 2H), 3.90 (s, 3H).

$^{13}\text{C}$  NMR ( $\text{CDCl}_3$ , 151 MHz)  $\delta$  166.5, 162.9 (d,  $J = 249.2$  Hz), 153.9, 147.3, 143.0, 137.8, 134.4, 131.3, 131.2 (d,  $J = 7.6$  Hz), 131.0 (d,  $J = 3.0$  Hz), 123.9, 115.3 (d,  $J = 21.1$  Hz), 105.3, 65.6, 39.0.

$^{19}\text{F}$  NMR ( $\text{CDCl}_3$ , 565 MHz)  $\delta$  -112.8.

HRMS calcd for  $(\text{C}_{17}\text{H}_{16}\text{FN}_4\text{O}_2)^+$   $[\text{M} + \text{H}]^+$ : 327.1252, found 327.1250.

## 19. Synthesis of LJI308

### The preparation of (4-morpholinophenyl)magnesium bromide (**16**)

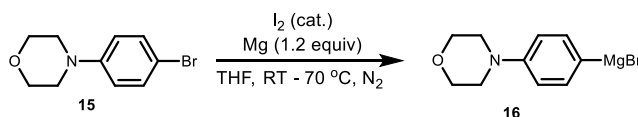

An oven-dried and  $N_2$  flushed 25 mL Schlenk-tube, equipped with a magnetic stirring bar and a septum, was charged with the corresponding 4-(4-bromophenyl)morpholine **15** (241.0 mg, 1.0 mmol, 1.0 equiv), magnesium chips (28.8 mg, 1.2 mmol, 1.2 equiv),  $I_2$  (one crystals) and anhydrous THF (5.0 mL). The resulting solution was heated to 70 °C for 3 hours to obtain the product. The resulting brown clear solution (approx. 0.2 M) can be used directly by syringe and stored in the refrigerator for several days.

#### 4-(4-(3-bromopyridin-4-yl)phenyl)morpholine (**17**)

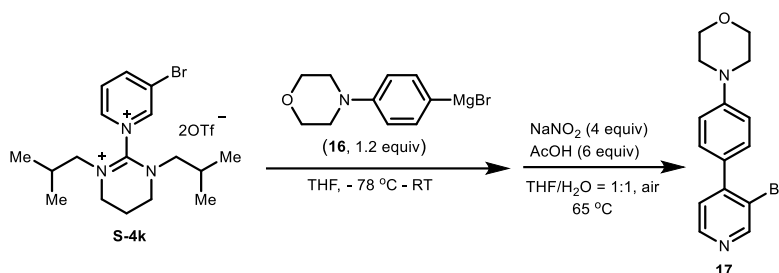

Under a nitrogen atmosphere, **S-4k** (195.3 mg, 0.3 mmol, 1.0 equiv) was added to an oven-dried 25 mL Schlenk tube with a magnetic bar at room temperature. Anhydrous THF (3.0 mL) was added and the suspension was cooled to -78 °C in a low-temperature reactor. A solution of the (4-morpholinophenyl)magnesium bromide (1.8 mL, 0.36 mmol, 1.2 equiv) was added dropwise via a 2.5 mL syringe within 2 minutes and the resulting suspension was stirred for 10 minutes to give a clear solution. Water (3.0 mL) was added in one portion and the reaction mixture stirred for 5 minutes at room temperature, then  $NaNO_2$  aqueous solution (100 mg/ mL, 0.83 mL, 4.0 equiv) and acetic acid (103  $\mu$ L, 6.0 equiv) were added in one portion and the mixture were stirred for 16 hours at 65 °C. The mixture was neutralized with a saturated sodium bicarbonate solution (2.0 mL), extracted with EtOAc (3  $\times$  8.0 mL) and the combined organic layers were washed with brine, dried over anhydrous  $Na_2SO_4$ , filtered, and concentrated under reduced pressure. The residue was purified by column chromatography on silica gel to afford 4-(4-(3-bromopyridin-4-yl)phenyl)morpholine (**17**) as a white solid.

$R_f$  = 0.3 (eluent: DCM/MeOH = 100:1).

Yield 20.9 mg (22%).

#### NMR spectroscopy:

$^1H$  NMR ( $CDCl_3$ , 400 MHz)  $\delta$  8.78 (s, 1H), 8.50 (d,  $J$  = 4.8 Hz, 1H), 7.42 (d,  $J$  = 8.8 Hz, 2H), 7.27 (d,  $J$  = 5.0 Hz, 1H), 6.99 (d,  $J$  = 8.8 Hz, 2H), 3.92 – 3.85 (m, 4H), 3.29 – 3.23 (m, 4H).

$^{13}C$  NMR ( $CDCl_3$ , 101 MHz)  $\delta$  152.3, 151.4, 149.6, 147.9, 130.0, 128.9, 125.6, 120.9 (low signal), 114.6, 66.8, 44.5.

HRMS calcd for  $(C_{15}H_{16}BrN_2O)^+$   $[M + H]^+$ : 319.0441, found 319.0440.

#### 2,6-difluoro-4-(4-(4-morpholinophenyl)pyridin-3-yl)phenol (LJI308)

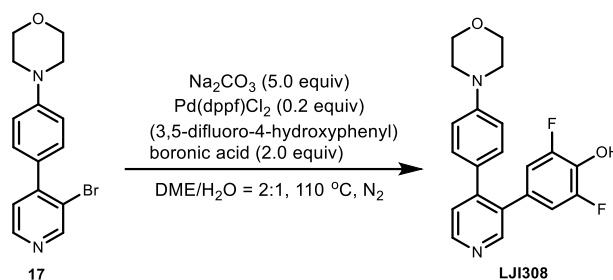

Under a nitrogen atmosphere, Pd(dppf)Cl<sub>2</sub> (7.3 mg, 20.0 mol%), Na<sub>2</sub>CO<sub>3</sub> (26.5 mg, 5.0 equiv), (3,5-difluoro-4-hydroxyphenyl)boronic acid **18** (17.4 mg, 2.0 equiv) and **17** (0.05 mmol, 15.9 mg, 1.0 equiv) were added to an oven-dried 10 mL Schlenk tube with a magnetic bar at room temperature. To this tube were added a mixture solvent of DME and H<sub>2</sub>O (ratio: 2:1, 0.9 mL) under a stream of nitrogen. The tube was heated at 110 °C for 10 h. The reaction mixture was filtered with silica gel and dried over anhydrous Na<sub>2</sub>SO<sub>4</sub>, filtered, and concentrated under reduced pressure. The residue was purified by column chromatography on silica gel to afford 2,6-difluoro-4-(4-(4-morpholinophenyl)pyridin-3-yl)phenol (**LJI308**) as a white solid.

R<sub>f</sub> = 0.15 (eluent: petroleum ether/EtOAc = 1:1).

**Yield** 12.6 mg (68%).

**NMR spectroscopy:**

<sup>1</sup>H NMR (DMSO-*d*<sub>6</sub>, 400 MHz) δ 10.34 (s, 1H), 8.55 (d, *J* = 4.8 Hz, 1H), 8.50 (s, 1H), 7.37 (d, *J* = 4.9 Hz, 1H), 7.06 (d, *J* = 8.5 Hz, 2H), 6.90 (d, *J* = 8.6 Hz, 2H), 6.85 (d, *J* = 7.9 Hz, 2H), 3.77 – 3.62 (m, 4H), 3.17 – 3.05 (m, 4H).

<sup>13</sup>C NMR (DMSO-*d*<sub>6</sub>, 151 MHz) δ 152.5 (dd, *J* = 241.6, 7.6 Hz), 151.0, 150.9, 149.3, 147.2, 133.5, 133.4 (t, *J* = 7.6 Hz), 130.3, 128.8 (t, *J* = 7.6 Hz), 128.1, 124.8, 114.8, 113.6 (dd, *J* = 16.6, 6.0 Hz), 66.5, 48.1.

<sup>19</sup>F NMR (DMSO-*d*<sub>6</sub>, 377 MHz) δ -132.2.

**HRMS** calcd for (C<sub>21</sub>H<sub>19</sub>F<sub>2</sub>N<sub>2</sub>O<sub>2</sub>)<sup>+</sup> [M + H]<sup>+</sup>: 369.1409, found 369.1408.

## 20. Comparison of two pyridine salt additions with methyl Grignard reagent

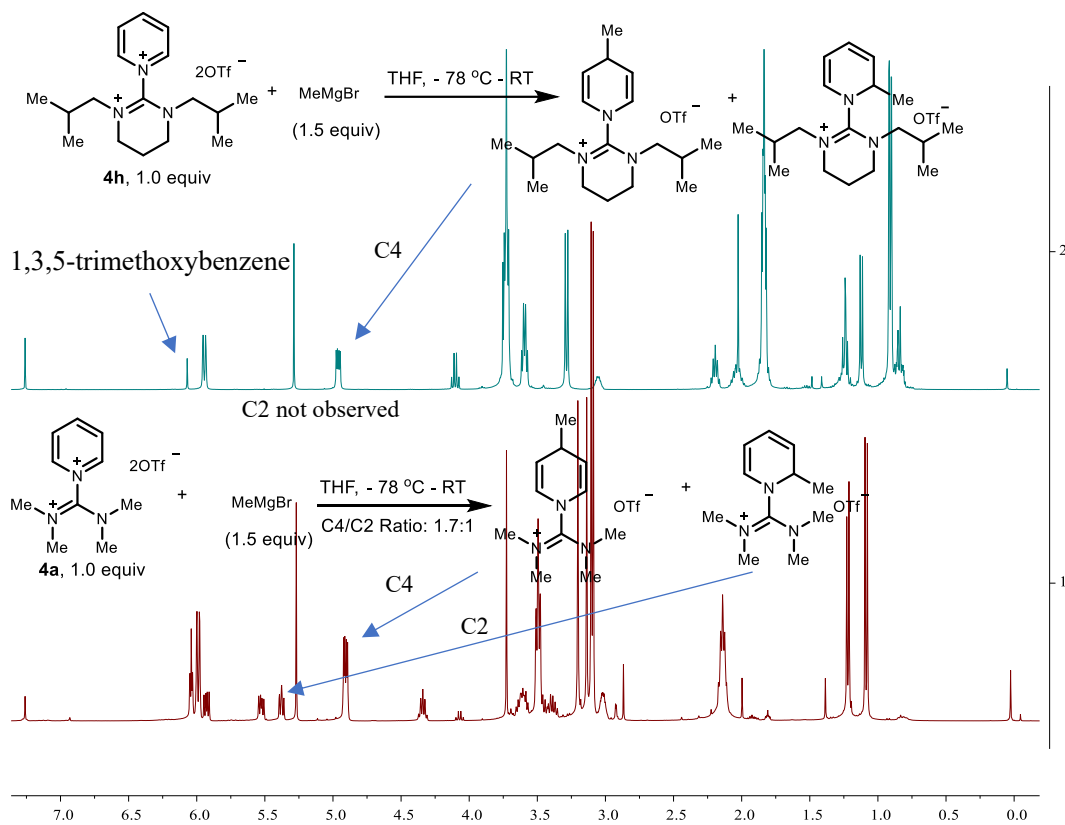

Figure S5. Crude <sup>1</sup>H NMR of **4h** and **4a** with methylMgBr

## 21. GC-MS data for the reaction of 5-chloropentanoic acid and **4h**

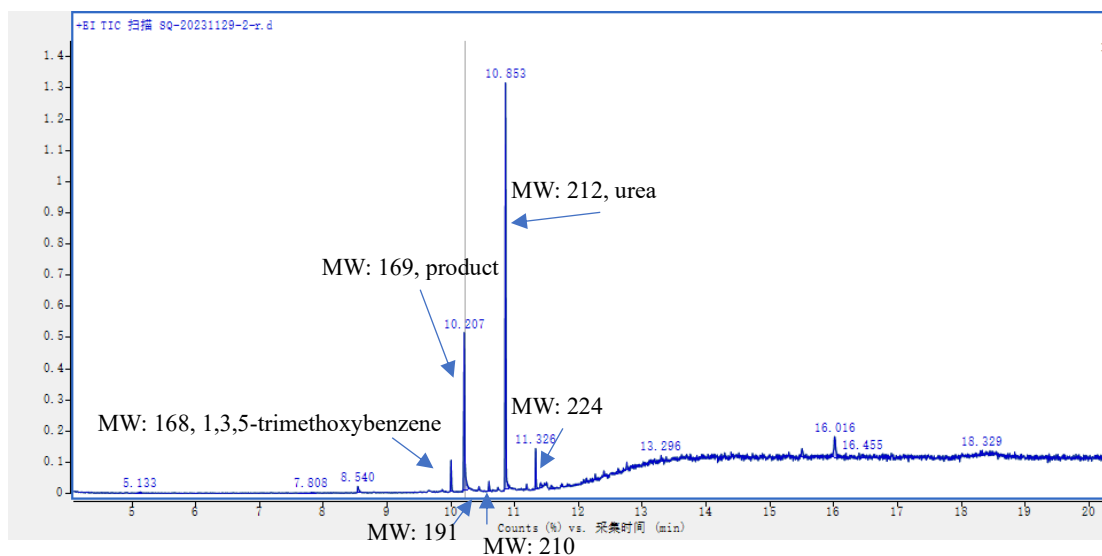

Figure S6. Crude GC-MS of **4h** and 5-chloropentanoic acid

丰度

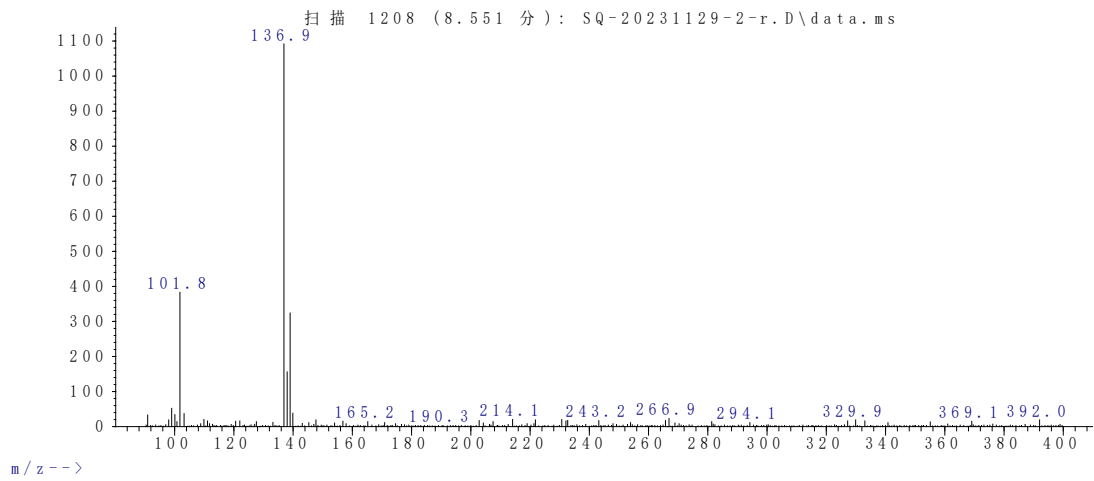

Figure S7. GC-MS detail (Time: 8.551 minutes)

丰度

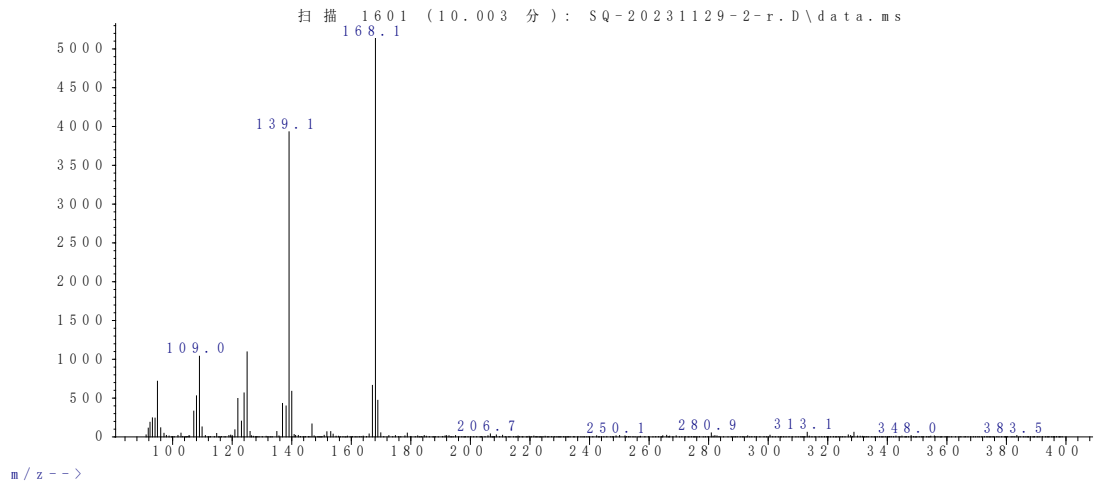

Figure S8. GC-MS detail (Time: 10.003 minutes)

丰度

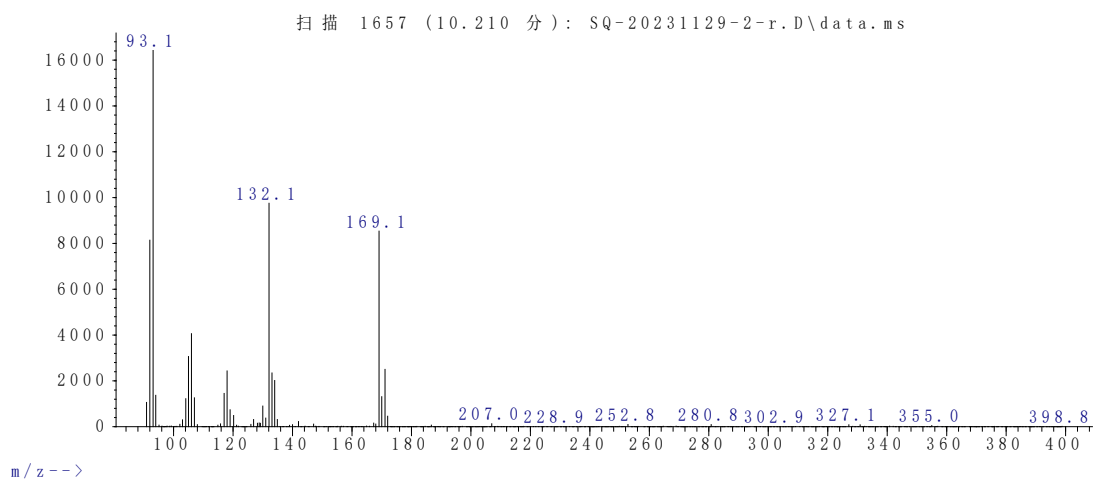

Figure S9. GC-MS detail (Time: 10.210 minutes)

丰度

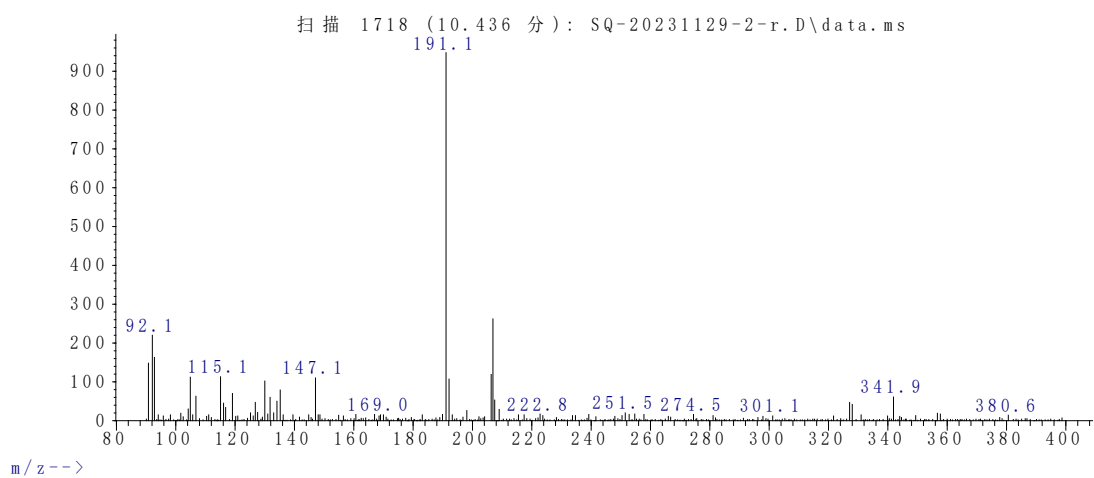

Figure S10. GC-MS detail (Time: 10.436 minutes)

丰度

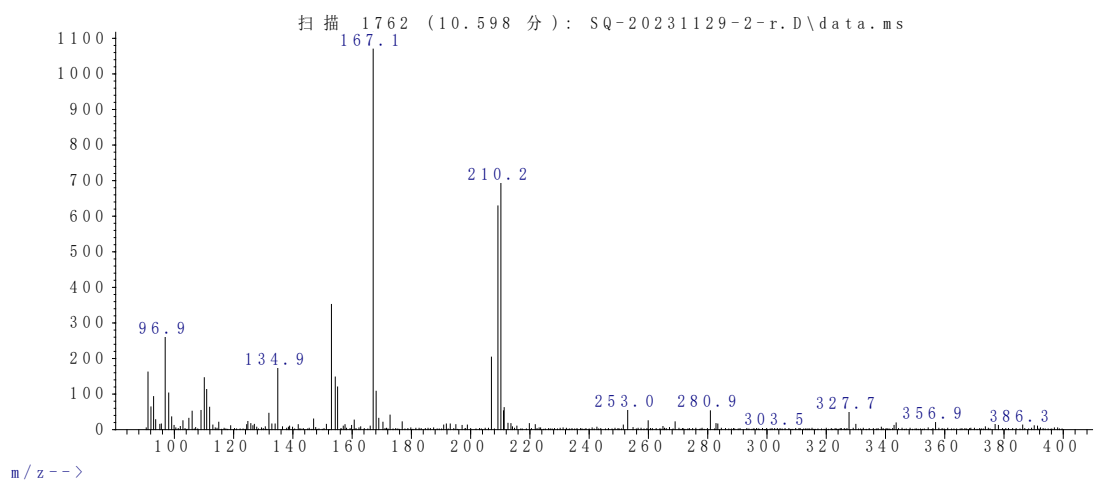

Figure S11. GC-MS detail (Time: 10.598 minutes)

丰度

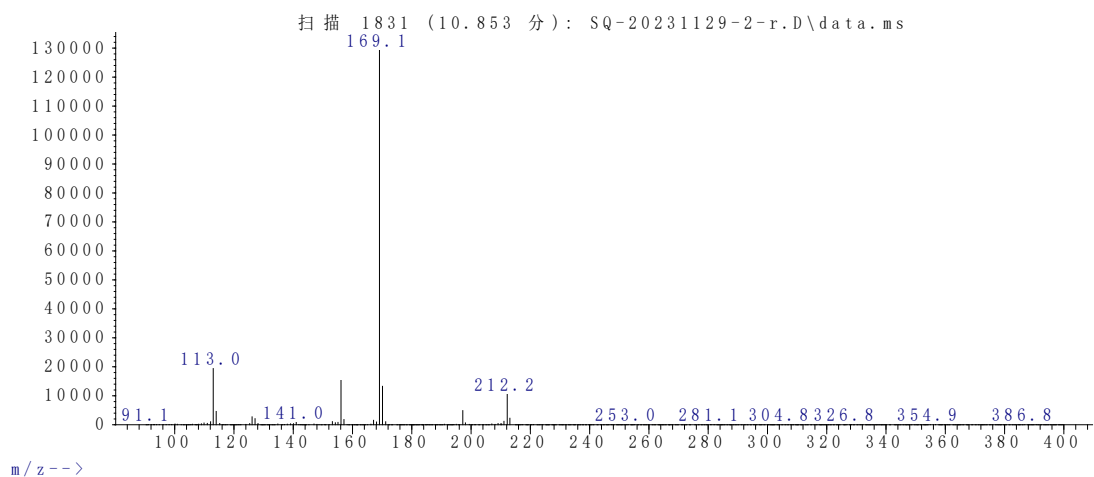



Figure S12. GC-MS detail (Time: 10.853 minutes)

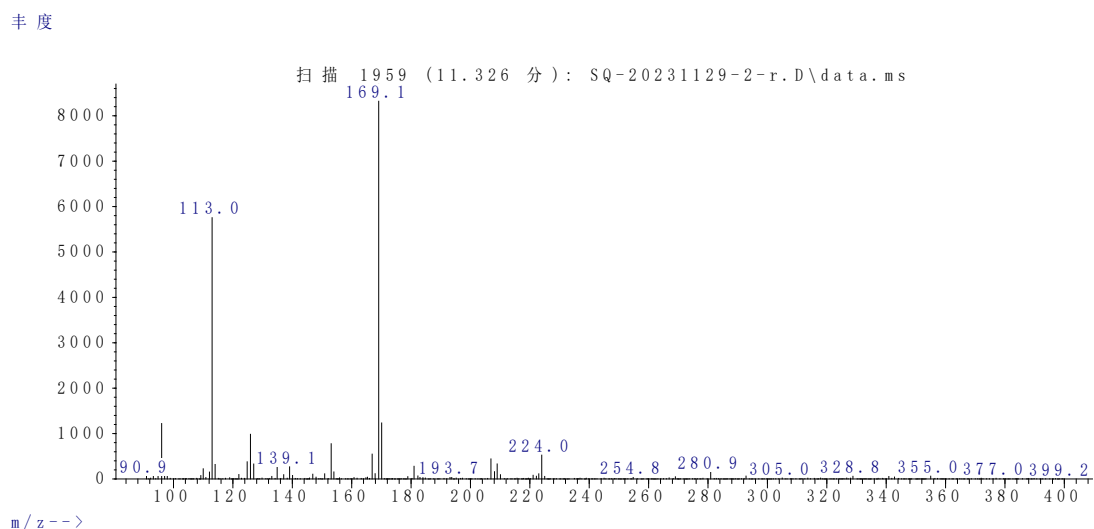

Figure S13. GC-MS detail (Time: 11.326 minutes)

## 22. GC-MS data for the reaction of (4-ethylphenyl)boronic acid and 4h

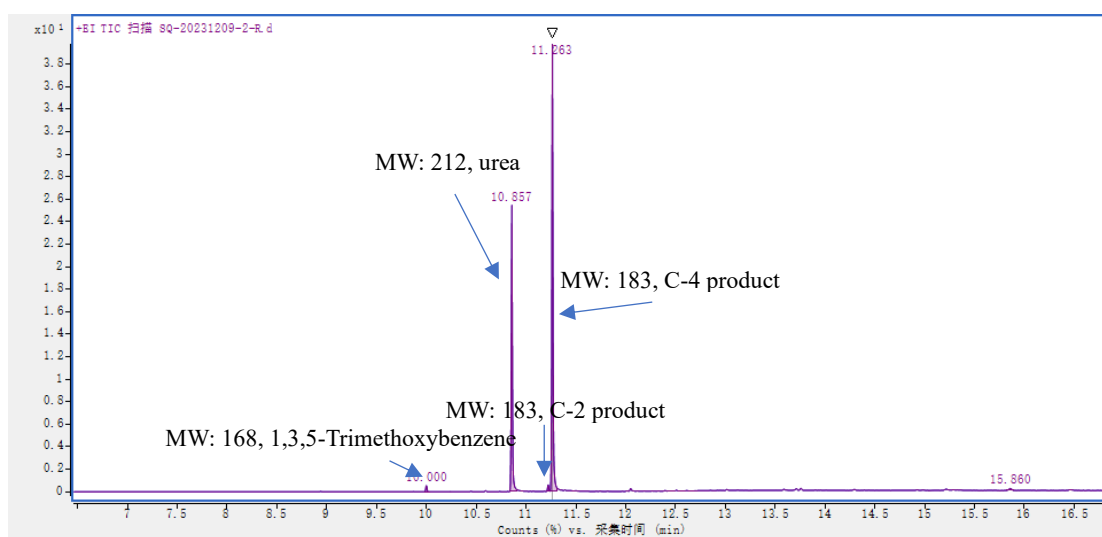

Figure S14. Crude GC-MS of 4h and (4-ethylphenyl)boronic acid

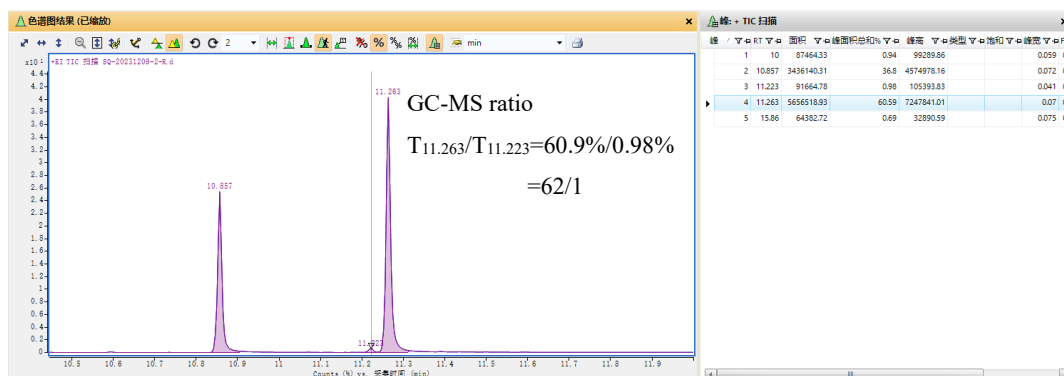

Figure S15. Crude GC-MS ratio of 4h and (4-ethylphenyl)boronic acid

丰度

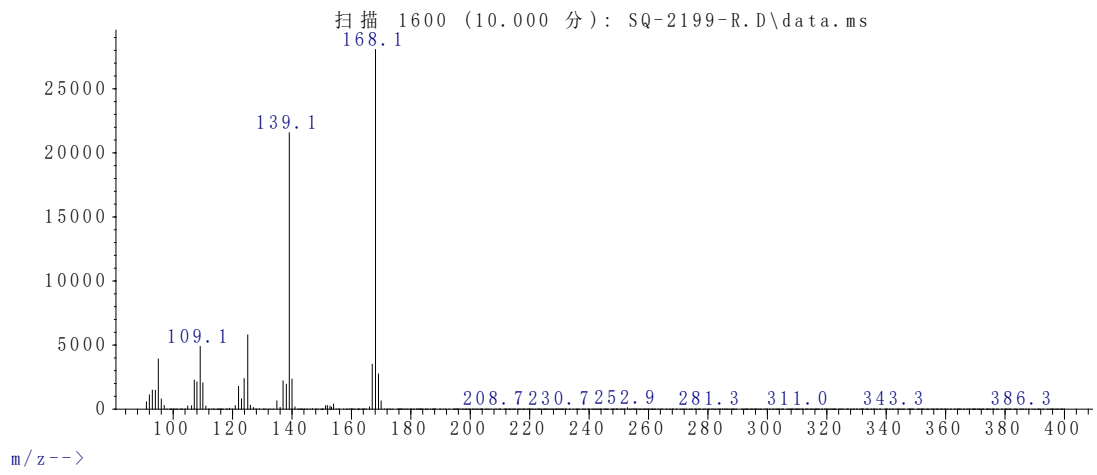

**Figure S16. GC-MS detail (Time: 10.000 minutes)**

丰度

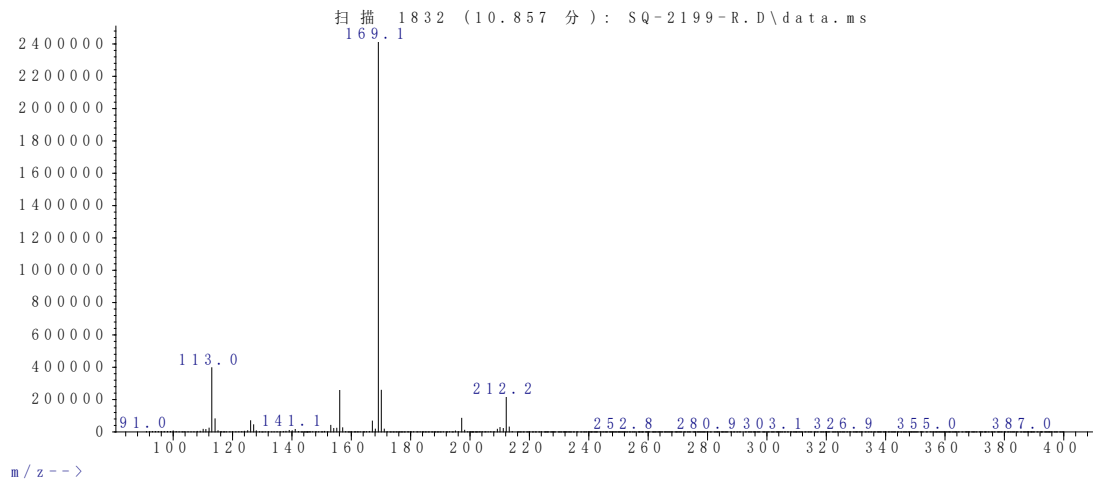

**Figure S17. GC-MS detail (Time: 10.857 minutes)**

丰度

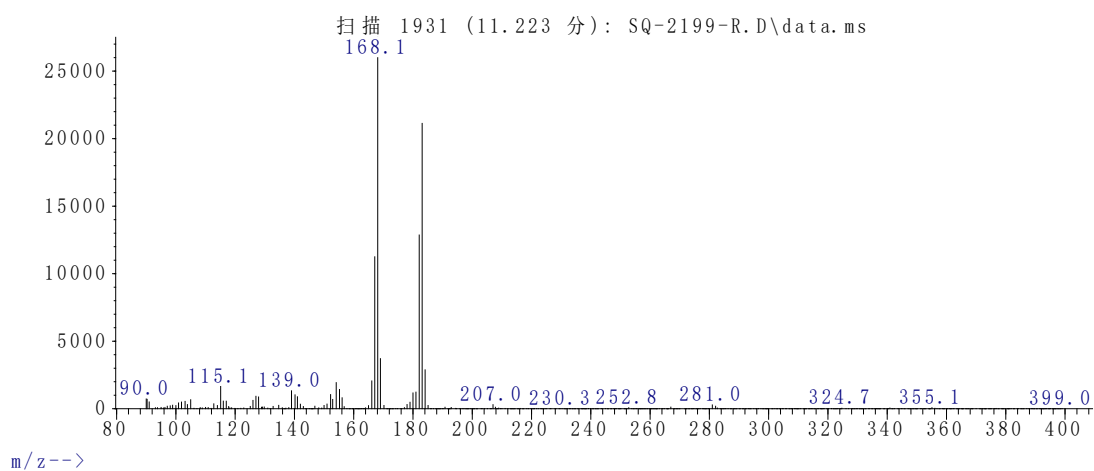

Figure S18. GC-MS detail (Time: 11.223 minutes)

丰度

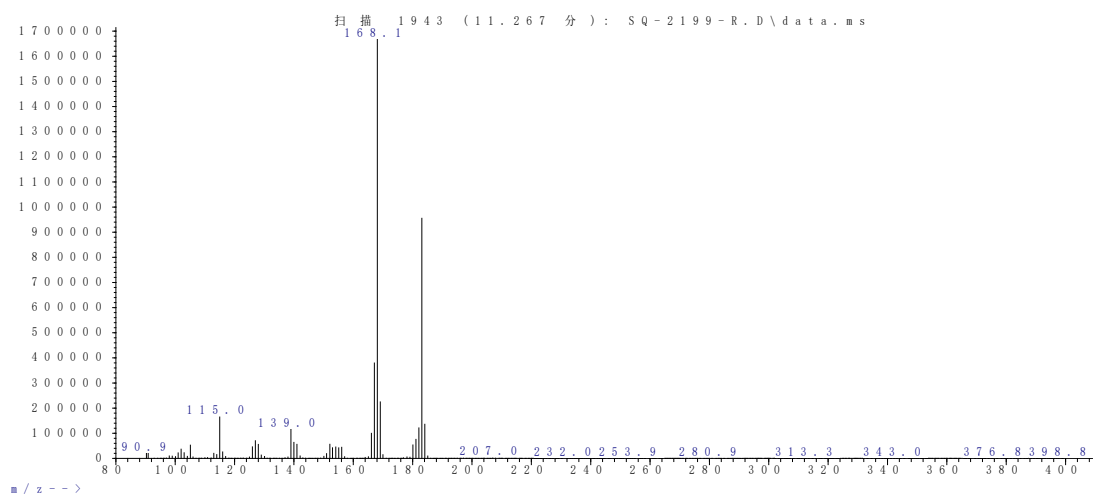

Figure S19. GC-MS detail (Time: 11.267 minutes)

### 23. GC-MS data after oxidation of S-4s and *n*-pentylMgBr

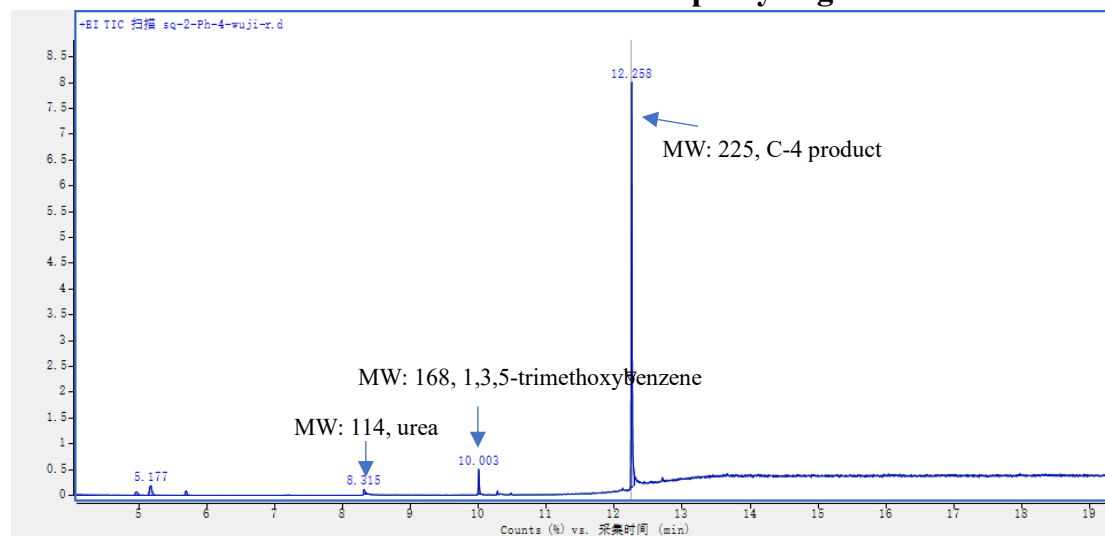

**Figure S20.** Crude GC-MS after oxidation of **S-4s** and *n*-pentylMgBr

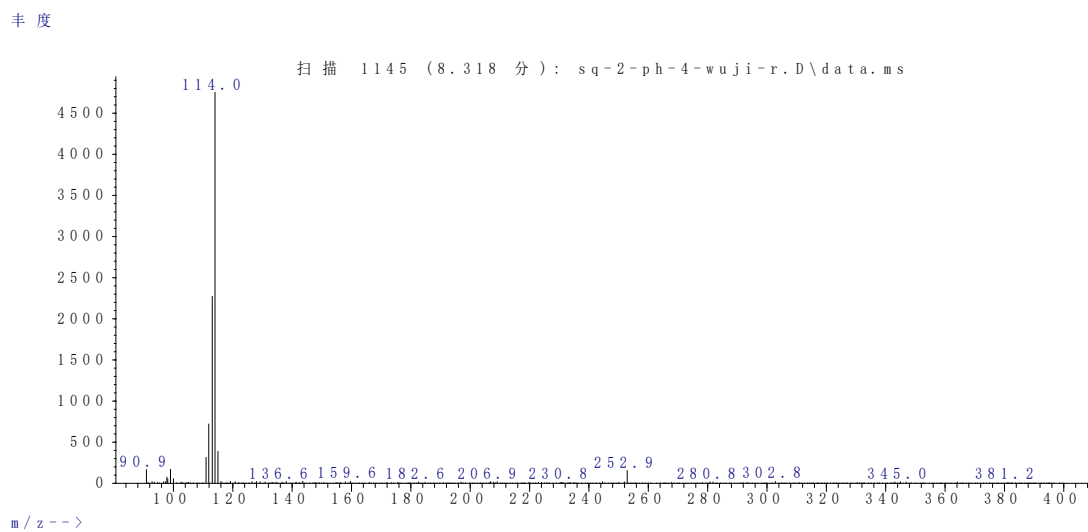

**Figure S21.** GC-MS detail (Time: 8.318 minutes)

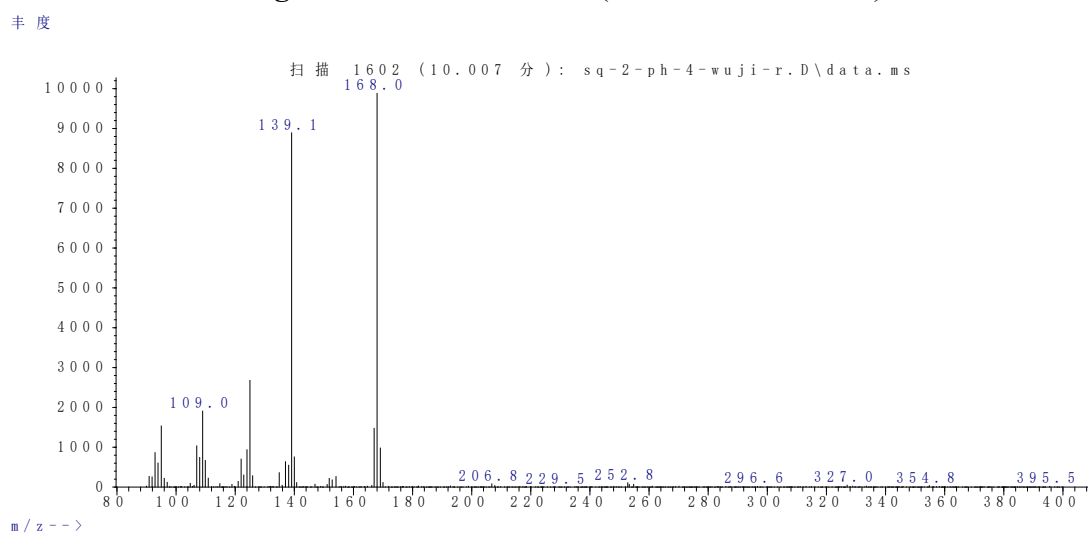

**Figure S22.** GC-MS detail (Time: 10.007 minutes)

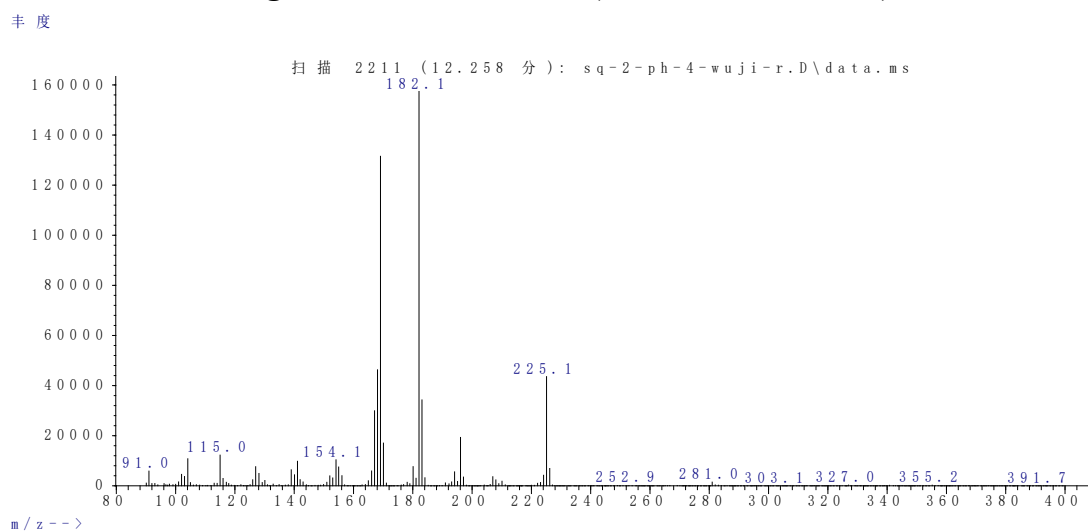

**Figure S23.** GC-MS detail (Time: 12.258 minutes)

**24. X-ray data of 4a and 4h**  
**X-ray Structure of Pyridinium 4a**

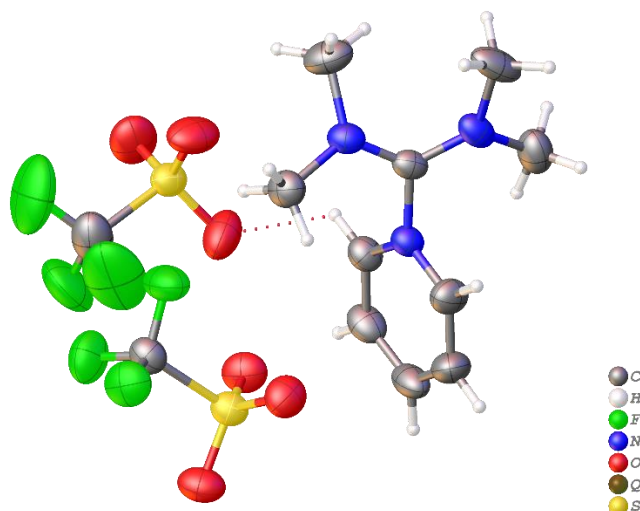

**Figure S24. X-ray Structure of Pyridinium 4a**

**Table 1 Crystal data and structure refinement for 4a.**

|                                    |                                                                                             |
|------------------------------------|---------------------------------------------------------------------------------------------|
| Identification code                | <b>4a</b>                                                                                   |
| CCDC number                        | 2328544                                                                                     |
| Empirical formula                  | C <sub>12</sub> H <sub>17</sub> F <sub>6</sub> N <sub>3</sub> O <sub>6</sub> S <sub>2</sub> |
| Formula weight                     | 477.40                                                                                      |
| Temperature/K                      | 222.99(10)                                                                                  |
| Crystal system                     | monoclinic                                                                                  |
| Space group                        | P2 <sub>1</sub> /n                                                                          |
| a/Å                                | 9.8561(4)                                                                                   |
| b/Å                                | 14.1484(5)                                                                                  |
| c/Å                                | 14.0248(6)                                                                                  |
| α/°                                | 90                                                                                          |
| β/°                                | 95.009(4)                                                                                   |
| γ/°                                | 90                                                                                          |
| Volume/Å <sup>3</sup>              | 1948.25(13)                                                                                 |
| Z                                  | 4                                                                                           |
| ρ <sub>calc</sub> /cm <sup>3</sup> | 1.628                                                                                       |
| μ/mm <sup>-1</sup>                 | 3.359                                                                                       |
| F(000)                             | 976.0                                                                                       |
| Crystal size/mm <sup>3</sup>       | 0.15 × 0.09 × 0.028                                                                         |
| Radiation                          | CuKα (λ = 1.54184)                                                                          |
| 2θ range for data collection/°     | 8.896 to 145.72                                                                             |
| Index ranges                       | -11 ≤ h ≤ 12, -17 ≤ k ≤ 10, -17 ≤ l ≤ 17                                                    |
| Reflections collected              | 7440                                                                                        |

|                                                |                                                                  |
|------------------------------------------------|------------------------------------------------------------------|
| Independent reflections                        | 3771 [ $R_{\text{int}} = 0.0650$ , $R_{\text{sigma}} = 0.0745$ ] |
| Data/restraints/parameters                     | 3771/0/266                                                       |
| Goodness-of-fit on $F^2$                       | 1.027                                                            |
| Final R indexes [ $I \geq 2\sigma(I)$ ]        | $R_1 = 0.0697$ , $wR_2 = 0.1840$                                 |
| Final R indexes [all data]                     | $R_1 = 0.0828$ , $wR_2 = 0.2074$                                 |
| Largest diff. peak/hole / $e \text{ \AA}^{-3}$ | 0.58/-0.52                                                       |

**Table 2 Fractional Atomic Coordinates ( $\times 10^4$ ) and Equivalent Isotropic Displacement Parameters ( $\text{\AA}^2 \times 10^3$ ) for 4a.  $U_{\text{eq}}$  is defined as 1/3 of the trace of the orthogonalised  $U_{\text{IJ}}$  tensor.**

| Atom | x         | y          | z          | $U_{\text{eq}}$ |
|------|-----------|------------|------------|-----------------|
| C1   | 3279(4)   | 1623(2)    | 3220(2)    | 33.7(6)         |
| C2   | 3804(4)   | 2925(2)    | 4287(3)    | 39.9(7)         |
| C3   | 3752(4)   | 3364(3)    | 5147(3)    | 48.7(9)         |
| C4   | 3228(4)   | 2874(3)    | 5894(3)    | 52.6(9)         |
| C5   | 2797(4)   | 1950(3)    | 5764(3)    | 54.7(10)        |
| C6   | 2845(4)   | 1537(3)    | 4887(3)    | 48.0(8)         |
| C7   | 4636(5)   | 1452(3)    | 1863(3)    | 60.3(11)        |
| C8   | 5706(4)   | 1303(3)    | 3525(3)    | 45.9(8)         |
| C9   | 1811(6)   | 779(3)     | 2004(3)    | 62.0(12)        |
| C10  | 835(4)    | 1958(3)    | 3055(3)    | 56.5(10)        |
| N1   | 3326(3)   | 2033.3(18) | 4165.0(19) | 34.4(6)         |
| N2   | 4451(3)   | 1472.0(19) | 2886(2)    | 38.4(6)         |
| N3   | 2053(3)   | 1454(2)    | 2807(2)    | 41.3(7)         |
| C11  | 8353(5)   | 4124(4)    | 3994(4)    | 68.5(13)        |
| F1   | 9387(4)   | 4041(3)    | 3453(4)    | 123.8(18)       |
| F2   | 8633(4)   | 4874(3)    | 4568(3)    | 106.2(13)       |
| F3   | 8289(5)   | 3365(3)    | 4515(4)    | 137(2)          |
| O1   | 7048(4)   | 5143(2)    | 2733(3)    | 73.3(10)        |
| O2   | 5832(4)   | 4481(2)    | 3967(3)    | 68.8(9)         |
| O3   | 6544(4)   | 3470(2)    | 2751(2)    | 72.1(10)        |
| S1   | 6769.2(9) | 4323.0(6)  | 3272.1(6)  | 41.2(3)         |
| C12  | 8671(4)   | 1020(3)    | 5616(3)    | 43.7(8)         |
| F4   | 8276(3)   | 791(2)     | 4715.9(18) | 66.8(7)         |
| F5   | 9508(3)   | 1742.3(19) | 5600(2)    | 71.4(8)         |
| F6   | 9356(3)   | 288.4(18)  | 5999(2)    | 64.4(7)         |
| O4   | 6557(3)   | 2063.3(19) | 5799(2)    | 54.4(7)         |
| O5   | 7778(3)   | 1462(2)    | 7230(2)    | 56.5(7)         |
| O6   | 6448(3)   | 405(2)     | 6173(2)    | 56.7(7)         |
| S2   | 7185.2(9) | 1269.2(5)  | 6284.3(6)  | 39.4(3)         |

**Table 3 Anisotropic Displacement Parameters ( $\text{\AA}^2 \times 10^3$ ) for 4a. The Anisotropic**

displacement factor exponent takes the form:  $-2\pi^2[h^2a^2U_{11}+2hka*b*U_{12}+...]$ .

| Atom | U11      | U22      | U33      | U23       | U13      | U12       |
|------|----------|----------|----------|-----------|----------|-----------|
| C1   | 45.3(17) | 25.1(13) | 29.9(15) | -0.1(11)  | -1.3(12) | -2.9(12)  |
| C2   | 41.9(17) | 34.0(15) | 42.9(18) | -3.1(13)  | -1.4(14) | -2.3(14)  |
| C3   | 49.4(19) | 41.3(19) | 54(2)    | -16.5(15) | -3.9(17) | 3.7(16)   |
| C4   | 41.6(18) | 72(2)    | 43(2)    | -22.0(18) | -2.6(14) | 8.0(18)   |
| C5   | 55(2)    | 74(3)    | 35.1(19) | -2.7(17)  | 7.2(16)  | -6(2)     |
| C6   | 56(2)    | 45.8(18) | 43(2)    | 1.7(15)   | 7.0(16)  | -11.6(17) |
| C7   | 78(3)    | 63(2)    | 41(2)    | 0.6(17)   | 16(2)    | 16(2)     |
| C8   | 43.2(19) | 47.0(19) | 47(2)    | 0.9(15)   | 3.1(15)  | 9.9(15)   |
| C9   | 91(3)    | 46(2)    | 43(2)    | 0.4(16)   | -22(2)   | -22(2)    |
| C10  | 42.2(19) | 60(2)    | 65(3)    | 12.8(19)  | -3.0(17) | -1.3(18)  |
| N1   | 37.3(13) | 32.6(12) | 32.6(14) | -2.3(10)  | -0.4(10) | -2.2(11)  |
| N2   | 47.5(16) | 34.1(13) | 33.0(14) | -2.9(10)  | 0.9(11)  | 3.6(12)   |
| N3   | 47.7(16) | 34.8(13) | 39.3(15) | 4.0(11)   | -8.0(12) | -9.1(12)  |
| C11  | 57(2)    | 63(3)    | 84(4)    | 23(2)     | -3(2)    | 0(2)      |
| F1   | 61(2)    | 106(3)   | 210(5)   | 25(3)     | 41(3)    | 27(2)     |
| F2   | 93(2)    | 123(3)   | 95(3)    | -11(2)    | -36(2)   | -35(2)    |
| F3   | 136(4)   | 118(3)   | 149(4)   | 85(3)     | -41(3)   | -6(3)     |
| O1   | 80(2)    | 64.3(19) | 76(2)    | 31.1(16)  | 4.6(18)  | -6.8(17)  |
| O2   | 61.0(18) | 65.1(18) | 84(2)    | -19.0(16) | 28.9(17) | -14.6(15) |
| O3   | 107(3)   | 61.4(18) | 48.7(17) | -18.6(14) | 11.7(17) | -23.0(18) |
| S1   | 47.7(5)  | 36.9(5)  | 39.0(5)  | -0.7(3)   | 3.7(3)   | -4.7(3)   |
| C12  | 45.0(18) | 38.8(17) | 46(2)    | -0.7(14)  | -2.8(14) | 3.8(15)   |
| F4   | 65.2(15) | 89.9(19) | 44.8(13) | -10.8(12) | 1.4(11)  | 12.4(14)  |
| F5   | 64.1(16) | 56.9(14) | 95(2)    | -2.4(13)  | 19.3(15) | -14.9(12) |
| F6   | 63.8(15) | 58.7(14) | 70.4(17) | 5.4(12)   | 3.4(12)  | 22.2(12)  |
| O4   | 63.5(17) | 43.7(14) | 55.5(17) | 4.8(12)   | 2.6(13)  | 14.6(13)  |
| O5   | 72.6(19) | 52.4(15) | 43.0(15) | -8.7(12)  | -2.8(13) | 7.0(14)   |
| O6   | 63.6(17) | 45.7(14) | 61.5(18) | -8.3(12)  | 9.9(14)  | -8.5(13)  |
| S2   | 47.1(5)  | 30.0(4)  | 40.4(5)  | -1.5(3)   | 0.6(3)   | 3.0(3)    |

**Table 4 Bond Lengths for 4a.**

| Atom | Atom | Length/Å |  | Atom | Atom | Length/Å |
|------|------|----------|--|------|------|----------|
| C1   | N1   | 1.444(4) |  | C11  | F2   | 1.346(7) |
| C1   | N2   | 1.302(5) |  | C11  | F3   | 1.305(6) |
| C1   | N3   | 1.315(5) |  | C11  | S1   | 1.807(5) |
| C2   | C3   | 1.362(5) |  | O1   | S1   | 1.425(3) |
| C2   | N1   | 1.352(4) |  | O2   | S1   | 1.418(3) |
| C3   | C4   | 1.393(7) |  | O3   | S1   | 1.418(3) |
| C4   | C5   | 1.382(6) |  | C12  | F4   | 1.328(5) |
| C5   | C6   | 1.366(6) |  | C12  | F5   | 1.314(5) |
| C6   | N1   | 1.352(5) |  | C12  | F6   | 1.324(4) |

|     |    |          |  |     |    |          |
|-----|----|----------|--|-----|----|----------|
| C7  | N2 | 1.462(5) |  | C12 | S2 | 1.841(4) |
| C8  | N2 | 1.481(5) |  | O4  | S2 | 1.427(3) |
| C9  | N3 | 1.479(5) |  | O5  | S2 | 1.428(3) |
| C10 | N3 | 1.465(6) |  | O6  | S2 | 1.425(3) |
| C11 | F1 | 1.327(7) |  |     |    |          |

**Table 5 Bond Angles for 4a.**

| Atom | Atom | Atom | Angle/°  |  | Atom | Atom | Atom | Angle/°    |
|------|------|------|----------|--|------|------|------|------------|
| N2   | C1   | N1   | 115.9(3) |  | F3   | C11  | F2   | 109.3(5)   |
| N2   | C1   | N3   | 128.4(3) |  | F3   | C11  | S1   | 111.1(4)   |
| N3   | C1   | N1   | 115.6(3) |  | O1   | S1   | C11  | 103.1(2)   |
| N1   | C2   | C3   | 119.9(3) |  | O2   | S1   | C11  | 102.8(3)   |
| C2   | C3   | C4   | 119.0(4) |  | O2   | S1   | O1   | 113.8(2)   |
| C5   | C4   | C3   | 120.1(3) |  | O2   | S1   | O3   | 114.0(2)   |
| C6   | C5   | C4   | 119.3(4) |  | O3   | S1   | C11  | 104.2(3)   |
| N1   | C6   | C5   | 119.6(4) |  | O3   | S1   | O1   | 116.6(2)   |
| C2   | N1   | C1   | 118.3(3) |  | F4   | C12  | S2   | 110.5(3)   |
| C6   | N1   | C1   | 119.6(3) |  | F5   | C12  | F4   | 107.8(3)   |
| C6   | N1   | C2   | 122.1(3) |  | F5   | C12  | F6   | 108.4(3)   |
| C1   | N2   | C7   | 123.1(3) |  | F5   | C12  | S2   | 112.8(3)   |
| C1   | N2   | C8   | 122.0(3) |  | F6   | C12  | F4   | 106.9(3)   |
| C7   | N2   | C8   | 114.9(3) |  | F6   | C12  | S2   | 110.1(3)   |
| C1   | N3   | C9   | 122.3(4) |  | O4   | S2   | C12  | 103.83(18) |
| C1   | N3   | C10  | 123.2(3) |  | O4   | S2   | O5   | 114.72(18) |
| C10  | N3   | C9   | 114.4(3) |  | O5   | S2   | C12  | 103.34(19) |
| F1   | C11  | F2   | 106.5(5) |  | O6   | S2   | C12  | 101.59(17) |
| F1   | C11  | S1   | 111.3(4) |  | O6   | S2   | O4   | 115.3(2)   |
| F2   | C11  | S1   | 109.6(4) |  | O6   | S2   | O5   | 115.41(19) |
| F3   | C11  | F1   | 108.9(5) |  |      |      |      |            |

**Table 6 Hydrogen Bonds for 4a.**

| D  | H  | A   | d(D-H)/Å | d(H-A)/Å | d(D-A)/Å | D-H-A/° |
|----|----|-----|----------|----------|----------|---------|
| C2 | H2 | O2  | 0.94     | 2.40     | 3.034(5) | 124.7   |
| C2 | H2 | O51 | 0.94     | 2.50     | 3.096(5) | 121.3   |

**Table 7 Torsion Angles for 4a.**

| A  | B  | C  | D  | Angle/°   |  | A  | B   | C  | D  | Angle/°   |
|----|----|----|----|-----------|--|----|-----|----|----|-----------|
| C2 | C3 | C4 | C5 | 1.4(6)    |  | N3 | C1  | N2 | C8 | -153.3(3) |
| C3 | C2 | N1 | C1 | 174.3(3)  |  | F1 | C11 | S1 | O1 | -56.1(4)  |
| C3 | C2 | N1 | C6 | -3.0(5)   |  | F1 | C11 | S1 | O2 | -174.7(4) |
| C3 | C4 | C5 | C6 | -2.4(6)   |  | F1 | C11 | S1 | O3 | 66.1(4)   |
| C4 | C5 | C6 | N1 | 0.7(6)    |  | F2 | C11 | S1 | O1 | 61.5(4)   |
| C5 | C6 | N1 | C1 | -175.3(4) |  | F2 | C11 | S1 | O2 | -57.1(4)  |



|    |    |    |     |           |  |    |     |    |    |           |
|----|----|----|-----|-----------|--|----|-----|----|----|-----------|
| C5 | C6 | N1 | C2  | 2.0(6)    |  | F2 | C11 | S1 | O3 | -176.3(4) |
| N1 | C1 | N2 | C7  | -153.3(3) |  | F3 | C11 | S1 | O1 | -177.6(5) |
| N1 | C1 | N2 | C8  | 27.0(4)   |  | F3 | C11 | S1 | O2 | 63.8(5)   |
| N1 | C1 | N3 | C9  | -160.1(3) |  | F3 | C11 | S1 | O3 | -55.4(5)  |
| N1 | C1 | N3 | C10 | 24.0(5)   |  | F4 | C12 | S2 | O4 | -62.2(3)  |
| N1 | C2 | C3 | C4  | 1.3(5)    |  | F4 | C12 | S2 | O5 | 177.7(3)  |
| N2 | C1 | N1 | C2  | 66.2(4)   |  | F4 | C12 | S2 | O6 | 57.8(3)   |
| N2 | C1 | N1 | C6  | -116.4(4) |  | F5 | C12 | S2 | O4 | 58.6(3)   |
| N2 | C1 | N3 | C9  | 20.2(5)   |  | F5 | C12 | S2 | O5 | -61.4(3)  |
| N2 | C1 | N3 | C10 | -155.7(4) |  | F5 | C12 | S2 | O6 | 178.6(3)  |
| N3 | C1 | N1 | C2  | -113.5(3) |  | F6 | C12 | S2 | O4 | 179.9(3)  |
| N3 | C1 | N1 | C6  | 63.8(4)   |  | F6 | C12 | S2 | O5 | 59.8(3)   |
| N3 | C1 | N2 | C7  | 26.4(5)   |  | F6 | C12 | S2 | O6 | -60.1(3)  |

**Table 8 Hydrogen Atom Coordinates ( $\text{\AA}\times 10^4$ ) and Isotropic Displacement Parameters ( $\text{\AA}^2\times 10^3$ ) for 4a.**

| Atom | x    | y    | z    | U(eq) |
|------|------|------|------|-------|
| H2   | 4171 | 3241 | 3779 | 48    |
| H3   | 4065 | 3988 | 5235 | 58    |
| H4   | 3168 | 3172 | 6488 | 63    |
| H5   | 2474 | 1609 | 6273 | 66    |
| H6   | 2545 | 911  | 4786 | 58    |
| H7A  | 4780 | 806  | 1665 | 90    |
| H7B  | 5420 | 1833 | 1740 | 90    |
| H7C  | 3829 | 1705 | 1506 | 90    |
| H8A  | 6292 | 1853 | 3522 | 69    |
| H8B  | 6181 | 757  | 3299 | 69    |
| H8C  | 5466 | 1186 | 4171 | 69    |
| H9A  | 1767 | 1120 | 1402 | 93    |
| H9B  | 958  | 451  | 2058 | 93    |
| H9C  | 2550 | 325  | 2026 | 93    |
| H10A | 191  | 1510 | 3282 | 85    |
| H10B | 419  | 2281 | 2493 | 85    |
| H10C | 1086 | 2416 | 3553 | 85    |

### X-ray Structure of Pyridinium 4h

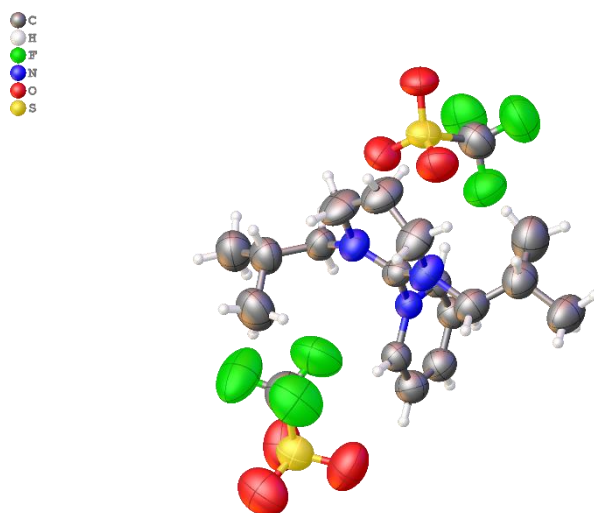

Figure S25. X-ray Structure of Pyridinium **4h**

Table 9. Crystal data and structure refinement for **4h**.

|                                    |                                                                                             |
|------------------------------------|---------------------------------------------------------------------------------------------|
| Identification code                | <b>4h</b>                                                                                   |
| CCDC number                        | 2328545                                                                                     |
| Empirical formula                  | C <sub>19</sub> H <sub>29</sub> F <sub>6</sub> N <sub>3</sub> O <sub>6</sub> S <sub>2</sub> |
| Formula weight                     | 573.57                                                                                      |
| Temperature/K                      | 273.00                                                                                      |
| Crystal system                     | monoclinic                                                                                  |
| Space group                        | P2 <sub>1</sub> /n                                                                          |
| a/Å                                | 10.7560(6)                                                                                  |
| b/Å                                | 14.3931(8)                                                                                  |
| c/Å                                | 17.2752(8)                                                                                  |
| α/°                                | 90                                                                                          |
| β/°                                | 99.796(3)                                                                                   |
| γ/°                                | 90                                                                                          |
| Volume/Å <sup>3</sup>              | 2635.4(2)                                                                                   |
| Z                                  | 4                                                                                           |
| ρ <sub>calc</sub> /cm <sup>3</sup> | 1.446                                                                                       |
| μ/mm <sup>-1</sup>                 | 1.683                                                                                       |
| F(000)                             | 1192.0                                                                                      |
| Crystal size/mm <sup>3</sup>       | 0.12 × 0.09 × 0.07                                                                          |
| Radiation                          | GaKα (λ = 1.34138)                                                                          |
| 2θ range for data collection/°     | 6.996 to 119.156                                                                            |
| Index ranges                       | -13 ≤ h ≤ 13, -18 ≤ k ≤ 18, -22 ≤ l ≤ 22                                                    |
| Reflections collected              | 30685                                                                                       |
| Independent reflections            | 5713 [R <sub>int</sub> = 0.0593, R <sub>sigma</sub> = 0.0511]                               |
| Data/restraints/parameters         | 5713/1319/631                                                                               |

|                                                |                                  |
|------------------------------------------------|----------------------------------|
| Goodness-of-fit on $F^2$                       | 1.008                            |
| Final R indexes [ $I \geq 2\sigma(I)$ ]        | $R_1 = 0.1185$ , $wR_2 = 0.2230$ |
| Final R indexes [all data]                     | $R_1 = 0.1782$ , $wR_2 = 0.2486$ |
| Largest diff. peak/hole / $e \text{ \AA}^{-3}$ | 0.51/-0.45                       |

**Table 10. Fractional Atomic Coordinates ( $\times 10^4$ ) and Equivalent Isotropic Displacement Parameters ( $\text{\AA}^2 \times 10^3$ ) for 4h.  $U_{eq}$  is defined as 1/3 of the trace of the orthogonalised  $U_{ij}$  tensor.**

| Atom | x         | y        | z        | U(eq)    |
|------|-----------|----------|----------|----------|
| S1   | -2500(5)  | 3384(4)  | 3972(3)  | 78.2(11) |
| F1   | -4871(7)  | 3273(7)  | 3944(6)  | 143(3)   |
| F2   | -4138(11) | 4401(8)  | 4602(5)  | 157(3)   |
| F3   | -4410(10) | 4423(7)  | 3347(5)  | 125(3)   |
| O1   | -2756(8)  | 2823(6)  | 3293(3)  | 97(2)    |
| O2   | -1665(6)  | 4125(6)  | 3909(5)  | 110(3)   |
| O3   | -2192(11) | 2884(8)  | 4681(4)  | 98(3)    |
| C18  | -4019(5)  | 3925(6)  | 3974(5)  | 106(2)   |
| S2   | -3051(4)  | 4185(3)  | -1358(2) | 88.1(12) |
| S2A  | -2985(7)  | 4301(5)  | -1203(5) | 113(2)   |
| O4A  | -3797(9)  | 4921(7)  | -876(8)  | 108(4)   |
| O5A  | -1768(6)  | 4719(8)  | -1149(7) | 141(4)   |
| O5   | -4119(5)  | 3614(5)  | -1640(5) | 126(3)   |
| O6A  | -3403(12) | 3991(10) | -1990(5) | 158(4)   |
| O4   | -2252(6)  | 4235(6)  | -1936(4) | 159(3)   |
| O6   | -3373(11) | 5104(4)  | -1146(7) | 156(4)   |
| N1   | -987(4)   | 5179(4)  | 2044(3)  | 58(3)    |
| C2   | -891(4)   | 5501(4)  | 1297(3)  | 68.9(18) |
| C3   | -1969(5)  | 5765(4)  | 782(2)   | 83(2)    |
| C4   | -3144(4)  | 5708(4)  | 1012(3)  | 84(3)    |
| C5   | -3240(4)  | 5386(4)  | 1758(3)  | 72(2)    |
| C6   | -2162(5)  | 5122(4)  | 2274(2)  | 63(2)    |
| N2   | 331(6)    | 4048(4)  | 2652(4)  | 74.2(19) |
| N3   | 694(6)    | 5607(4)  | 3024(5)  | 81(2)    |
| C1   | 64(7)     | 4948(5)  | 2611(4)  | 63.6(12) |
| C7   | 1360(10)  | 3709(6)  | 3261(6)  | 112(3)   |
| C8   | 1721(11)  | 4386(6)  | 3877(6)  | 111(3)   |
| C9   | 1784(9)   | 5379(6)  | 3617(7)  | 107(3)   |
| C10  | -366(7)   | 3296(5)  | 2193(4)  | 78.8(18) |
| C11  | 426(9)    | 2703(7)  | 1763(6)  | 96(2)    |
| C12  | -394(10)  | 1911(6)  | 1337(6)  | 118(3)   |

|      |           |          |          |          |
|------|-----------|----------|----------|----------|
| C13  | 1021(10)  | 3205(7)  | 1136(6)  | 131(3)   |
| C14  | 371(8)    | 6591(5)  | 2920(5)  | 90(2)    |
| C15  | 144(11)   | 7078(5)  | 3624(6)  | 103(2)   |
| C16  | -907(11)  | 6584(7)  | 3966(7)  | 138(3)   |
| C17  | -192(11)  | 8090(5)  | 3502(6)  | 114(3)   |
| N2A  | 833(15)   | 4285(12) | 2502(9)  | 66(5)    |
| N3A  | 234(17)   | 5449(11) | 3298(8)  | 74(6)    |
| C1A  | 30(17)    | 4938(9)  | 2635(11) | 63.6(12) |
| C4A  | -2928(11) | 5859(11) | 918(7)   | 75(7)    |
| C3A  | -3211(9)  | 5274(10) | 1504(8)  | 56(5)    |
| C2A  | -2258(12) | 4978(10) | 2099(7)  | 50(5)    |
| N1A  | -1022(10) | 5266(11) | 2109(7)  | 53(8)    |
| C6A  | -739(9)   | 5852(9)  | 1522(8)  | 54(4)    |
| C5A  | -1692(12) | 6148(10) | 927(7)   | 71(5)    |
| C7A  | 1963(18)  | 4042(16) | 3067(11) | 81(6)    |
| C8A  | 2240(30)  | 4800(20) | 3620(20) | 127(12)  |
| C9A  | 1200(20)  | 5208(18) | 3972(11) | 86(7)    |
| C10A | 580(20)   | 3782(15) | 1762(12) | 92(3)    |
| C11A | 400(20)   | 2774(19) | 1736(14) | 97(3)    |
| C12A | 80(30)    | 2230(20) | 968(11)  | 121(5)   |
| C13A | -720(20)  | 2660(20) | 2180(15) | 115(5)   |
| C14A | -560(18)  | 6230(11) | 3448(17) | 96(3)    |
| C15A | 130(30)   | 7097(11) | 3616(16) | 103(3)   |
| C16A | 770(20)   | 7502(17) | 2965(12) | 104(5)   |
| C17A | -560(30)  | 7910(16) | 3935(18) | 117(6)   |
| S1A  | -2506(13) | 3659(10) | 4098(8)  | 90(2)    |
| O1A  | -2480(20) | 3287(16) | 3346(9)  | 100(4)   |
| O2A  | -1890(20) | 4523(13) | 4231(14) | 120(5)   |
| O3A  | -2520(30) | 3099(17) | 4767(11) | 81(5)    |
| F1A  | -4890(20) | 3691(17) | 4252(14) | 135(5)   |
| F2A  | -4090(20) | 4778(16) | 3429(14) | 118(5)   |
| F3A  | -3650(20) | 4767(16) | 4621(14) | 135(5)   |
| C18A | -4029(13) | 4217(13) | 4026(11) | 117(3)   |
| F6   | -2862(8)  | 3658(8)  | 105(6)   | 166(4)   |
| F4   | -1825(9)  | 2828(5)  | -557(6)  | 185(4)   |
| F5   | -1206(7)  | 4178(6)  | -228(5)  | 171(3)   |
| C19  | -2206(6)  | 3674(5)  | -465(3)  | 129(3)   |
| F7   | -4044(8)  | 2961(8)  | -729(8)  | 163(4)   |
| F9   | -2153(9)  | 2813(10) | -872(8)  | 183(5)   |

|      |           |          |         |        |
|------|-----------|----------|---------|--------|
| F8   | -2283(14) | 3624(13) | 122(7)  | 168(4) |
| C19A | -2919(8)  | 3320(5)  | -541(5) | 127(3) |

**Table 11. Anisotropic Displacement Parameters ( $\text{\AA}^2 \times 10^3$ ) for 4h. The Anisotropic displacement factor exponent takes the form:  $-2\pi^2[h^2a^{*2}U_{11}+2hka^*b^*U_{12}+\dots]$ .**

| Atom | U11      | U22    | U33      | U23      | U13      | U12       |
|------|----------|--------|----------|----------|----------|-----------|
| S1   | 86.9(15) | 84(2)  | 62.8(18) | 9.9(15)  | 9.0(12)  | -6.3(15)  |
| F1   | 97(4)    | 169(7) | 171(6)   | -6(5)    | 45(4)    | -20(4)    |
| F2   | 174(7)   | 161(7) | 146(5)   | -26(5)   | 59(5)    | 4(5)      |
| F3   | 121(6)   | 123(6) | 127(5)   | 28(4)    | 8(4)     | 18(5)     |
| O1   | 112(5)   | 105(5) | 69(3)    | -6(3)    | 2(3)     | 1(4)      |
| O2   | 107(4)   | 108(5) | 119(5)   | 21(4)    | 28(4)    | -13(4)    |
| O3   | 117(7)   | 102(6) | 72(4)    | 24(4)    | 9(4)     | 11(4)     |
| C18  | 107(4)   | 115(5) | 102(4)   | 0(4)     | 33(4)    | 0(4)      |
| S2   | 70.3(18) | 101(2) | 94(2)    | 1.3(18)  | 17.1(16) | -13.2(16) |
| S2A  | 95(3)    | 119(4) | 126(4)   | 3(3)     | 23(3)    | 4(3)      |
| O4A  | 93(6)    | 93(6)  | 143(8)   | -9(6)    | 38(6)    | 31(5)     |
| O5A  | 103(6)   | 143(7) | 182(8)   | -6(6)    | 33(6)    | -28(6)    |
| O5   | 73(4)    | 126(6) | 171(6)   | -44(5)   | 0(4)     | -4(4)     |
| O6A  | 152(8)   | 181(8) | 146(8)   | 5(7)     | 41(7)    | -31(7)    |
| O4   | 109(6)   | 226(8) | 143(6)   | -3(6)    | 18(5)    | 1(6)      |
| O6   | 145(7)   | 118(6) | 207(8)   | 10(6)    | 33(6)    | 24(6)     |
| N1   | 55(3)    | 58(3)  | 61(3)    | 1.7(16)  | 14.2(17) | 3.4(16)   |
| C2   | 69(2)    | 70(2)  | 69(2)    | -0.4(18) | 14.3(18) | 0.6(18)   |
| C3   | 85(3)    | 82(3)  | 82(3)    | 2.5(19)  | 13.3(19) | 0.4(19)   |
| C4   | 81(3)    | 83(3)  | 86(3)    | 4.0(19)  | 12.0(19) | 2.1(19)   |
| C5   | 68(3)    | 75(3)  | 72(3)    | -2.6(19) | 12.8(18) | 2.4(18)   |
| C6   | 59(3)    | 64(3)  | 64(3)    | -0.4(18) | 11.7(17) | -1.6(17)  |
| N2   | 70(4)    | 70(4)  | 79(4)    | 2(3)     | 5(3)     | 12(3)     |
| N3   | 59(3)    | 66(4)  | 112(5)   | 6(3)     | -3(3)    | 2(3)      |
| C1   | 58(2)    | 67(3)  | 66(3)    | 9(2)     | 11(2)    | 8(2)      |
| C7   | 114(6)   | 98(6)  | 109(6)   | 24(5)    | -22(5)   | 21(5)     |
| C8   | 114(6)   | 98(6)  | 106(6)   | 19(5)    | -23(5)   | 7(5)      |
| C9   | 82(5)    | 96(6)  | 132(7)   | -1(5)    | -18(5)   | 10(5)     |
| C10  | 83(4)    | 67(3)  | 91(4)    | 3(3)     | 28(3)    | 1(3)      |
| C11  | 95(4)    | 93(4)  | 105(4)   | -3(3)    | 33(3)    | 7(3)      |
| C12  | 132(6)   | 104(6) | 124(6)   | -11(5)   | 42(5)    | -3(5)     |
| C13  | 135(6)   | 136(7) | 135(6)   | -9(6)    | 57(5)    | -2(6)     |
| C14  | 91(4)    | 79(4)  | 97(4)    | 3(3)     | 10(3)    | -4(3)     |

|      |         |         |         |        |        |         |
|------|---------|---------|---------|--------|--------|---------|
| C15  | 111(4)  | 94(4)   | 101(4)  | -7(3)  | 4(4)   | 7(4)    |
| C16  | 145(7)  | 112(6)  | 159(7)  | -17(6) | 35(6)  | 5(6)    |
| C17  | 138(7)  | 83(5)   | 112(6)  | -6(5)  | -5(5)  | 0(5)    |
| N2A  | 64(8)   | 76(9)   | 55(8)   | -1(7)  | 2(6)   | 17(7)   |
| N3A  | 77(9)   | 65(8)   | 81(9)   | 5(7)   | 10(7)  | -5(7)   |
| C1A  | 58(2)   | 67(3)   | 66(3)   | 9(2)   | 11(2)  | 8(2)    |
| C4A  | 74(7)   | 75(7)   | 76(7)   | 1(2)   | 12(2)  | 0(2)    |
| C3A  | 54(5)   | 57(5)   | 56(5)   | -2(2)  | 11(2)  | 1(2)    |
| C2A  | 49(5)   | 50(5)   | 50(5)   | -1(2)  | 10(2)  | 0(2)    |
| N1A  | 51(9)   | 52(9)   | 55(9)   | 1(2)   | 11(2)  | 3(2)    |
| C6A  | 55(5)   | 55(5)   | 53(5)   | 0(2)   | 9(2)   | 0(2)    |
| C5A  | 71(6)   | 71(6)   | 72(6)   | 1(2)   | 11(2)  | -1(2)   |
| C7A  | 69(9)   | 86(10)  | 89(10)  | 21(8)  | 12(8)  | 29(8)   |
| C8A  | 119(14) | 134(14) | 125(14) | 15(10) | 12(9)  | -14(10) |
| C9A  | 85(10)  | 94(11)  | 79(10)  | 6(8)   | 15(8)  | -3(8)   |
| C10A | 93(5)   | 91(5)   | 98(5)   | 0(5)   | 31(5)  | 8(5)    |
| C11A | 98(5)   | 93(5)   | 104(5)  | -2(5)  | 32(5)  | 4(5)    |
| C12A | 130(9)  | 113(9)  | 126(9)  | -8(9)  | 40(8)  | 9(9)    |
| C13A | 114(9)  | 110(9)  | 123(9)  | 2(9)   | 25(8)  | 5(9)    |
| C14A | 99(6)   | 93(5)   | 98(6)   | -7(5)  | 19(5)  | 0(5)    |
| C15A | 108(5)  | 93(5)   | 103(5)  | -6(5)  | 10(5)  | 4(5)    |
| C16A | 108(9)  | 92(9)   | 110(9)  | -7(8)  | 11(8)  | -5(8)   |
| C17A | 124(9)  | 99(9)   | 125(10) | -15(9) | 14(9)  | 4(8)    |
| S1A  | 90(3)   | 107(5)  | 77(4)   | 19(4)  | 26(3)  | -3(4)   |
| O1A  | 105(8)  | 110(9)  | 90(7)   | 7(7)   | 29(6)  | 4(8)    |
| O2A  | 123(9)  | 119(9)  | 119(9)  | 7(8)   | 19(8)  | -20(8)  |
| O3A  | 87(9)   | 96(9)   | 59(7)   | 15(7)  | 15(6)  | 12(7)   |
| F1A  | 116(8)  | 155(9)  | 141(9)  | -6(8)  | 41(7)  | -18(8)  |
| F2A  | 111(9)  | 116(10) | 131(8)  | 25(8)  | 35(7)  | 14(8)   |
| F3A  | 135(10) | 130(10) | 140(8)  | -37(8) | 19(8)  | -15(8)  |
| C18A | 113(5)  | 128(6)  | 113(5)  | 1(5)   | 31(5)  | -1(5)   |
| F6   | 164(7)  | 210(7)  | 134(6)  | 25(6)  | 53(6)  | -9(7)   |
| F4   | 194(7)  | 144(6)  | 181(7)  | -21(6) | -71(6) | 49(6)   |
| F5   | 132(6)  | 214(7)  | 156(6)  | -25(6) | -3(5)  | -43(5)  |
| C19  | 119(5)  | 131(5)  | 134(5)  | -4(4)  | 14(4)  | -1(4)   |
| F7   | 153(8)  | 137(7)  | 203(9)  | -14(7) | 45(7)  | -33(6)  |
| F9   | 178(8)  | 138(7)  | 193(9)  | -42(7) | -84(8) | 37(7)   |
| F8   | 164(8)  | 186(7)  | 139(7)  | 17(7)  | -15(7) | 18(7)   |
| C19A | 116(5)  | 133(5)  | 129(5)  | -19(5) | 8(5)   | 1(5)    |

**Table 12. Bond Lengths for 4h.**

| Atom | Atom | Length/Å   | Atom | Atom | Length/Å  |
|------|------|------------|------|------|-----------|
| S1   | O1   | 1.411(2)   | C15  | C17  | 1.507(10) |
| S1   | O2   | 1.410(2)   | N2A  | C1A  | 1.323(14) |
| S1   | O3   | 1.410(2)   | N2A  | C7A  | 1.466(15) |
| S1   | C18  | 1.811(2)   | N2A  | C10A | 1.454(15) |
| F1   | C18  | 1.306(2)   | N3A  | C1A  | 1.347(13) |
| F2   | C18  | 1.307(2)   | N3A  | C9A  | 1.467(15) |
| F3   | C18  | 1.307(2)   | N3A  | C14A | 1.463(16) |
| S2   | O5   | 1.4294(12) | C1A  | N1A  | 1.407(13) |
| S2   | O4   | 1.4267(12) | C4A  | C3A  | 1.3900    |
| S2   | O6   | 1.4298(12) | C4A  | C5A  | 1.3900    |
| S2   | C19  | 1.807(2)   | C3A  | C2A  | 1.3900    |
| S2A  | O4A  | 1.4311(12) | C2A  | N1A  | 1.3900    |
| S2A  | O5A  | 1.4295(12) | N1A  | C6A  | 1.3900    |
| S2A  | O6A  | 1.4290(12) | C6A  | C5A  | 1.3900    |
| S2A  | C19A | 1.811(2)   | C7A  | C8A  | 1.440(16) |
| N1   | C2   | 1.3900     | C8A  | C9A  | 1.483(16) |
| N1   | C6   | 1.3900     | C10A | C11A | 1.462(17) |
| N1   | C1   | 1.404(6)   | C11A | C12A | 1.531(16) |
| C2   | C3   | 1.3900     | C11A | C13A | 1.546(16) |
| C3   | C4   | 1.3900     | C14A | C15A | 1.453(17) |
| C4   | C5   | 1.3900     | C15A | C16A | 1.534(16) |
| C5   | C6   | 1.3900     | C15A | C17A | 1.533(15) |
| N2   | C1   | 1.326(8)   | S1A  | O1A  | 1.410(2)  |
| N2   | C7   | 1.474(9)   | S1A  | O2A  | 1.409(2)  |
| N2   | C10  | 1.470(8)   | S1A  | O3A  | 1.410(2)  |
| N3   | C1   | 1.306(8)   | S1A  | C18A | 1.810(2)  |
| N3   | C9   | 1.457(9)   | F1A  | C18A | 1.305(2)  |
| N3   | C14  | 1.462(8)   | F2A  | C18A | 1.305(2)  |
| C7   | C8   | 1.446(10)  | F3A  | C18A | 1.305(2)  |
| C8   | C9   | 1.504(10)  | F6   | C19  | 1.306(2)  |
| C10  | C11  | 1.490(9)   | F4   | C19  | 1.303(2)  |
| C11  | C12  | 1.549(10)  | F5   | C19  | 1.304(2)  |
| C11  | C13  | 1.531(10)  | F7   | C19A | 1.305(2)  |
| C14  | C15  | 1.460(10)  | F9   | C19A | 1.304(2)  |
| C15  | C16  | 1.536(10)  | F8   | C19A | 1.305(2)  |

**Table 13. Bond Angles for 4h.**

| Atom | Atom | Atom | Angle/°  | Atom | Atom | Atom | Angle/°   |
|------|------|------|----------|------|------|------|-----------|
| 1    | S1   | C18  | 101.5(5) | C1A  | N2A  | C7A  | 123.1(12) |
| O2   | S1   | O1   | 113.8(5) | C1A  | N2A  | C10A | 118.5(15) |

|     |     |      |            |  |      |      |      |           |
|-----|-----|------|------------|--|------|------|------|-----------|
| O2  | S1  | C18  | 105.2(5)   |  | C10A | N2A  | C7A  | 118.5(14) |
| O3  | S1  | O1   | 114.4(6)   |  | C1A  | N3A  | C9A  | 122.5(12) |
| O3  | S1  | O2   | 113.3(7)   |  | C1A  | N3A  | C14A | 123.7(15) |
| O3  | S1  | C18  | 107.3(5)   |  | C14A | N3A  | C9A  | 113.5(15) |
| F1  | C18 | S1   | 108.5(5)   |  | N2A  | C1A  | N3A  | 121.2(12) |
| F1  | C18 | F2   | 104.0(7)   |  | N2A  | C1A  | N1A  | 127.1(14) |
| F1  | C18 | F3   | 103.7(8)   |  | N3A  | C1A  | N1A  | 111.3(12) |
| F2  | C18 | S1   | 116.2(7)   |  | C3A  | C4A  | C5A  | 120.0     |
| F3  | C18 | S1   | 113.4(7)   |  | C4A  | C3A  | C2A  | 120.0     |
| F3  | C18 | F2   | 109.7(8)   |  | C3A  | C2A  | N1A  | 120.0     |
| O5  | S2  | O6   | 113.8(7)   |  | C2A  | N1A  | C1A  | 124.7(14) |
| O5  | S2  | C19  | 108.3(4)   |  | C6A  | N1A  | C1A  | 115.0(14) |
| O4  | S2  | O5   | 109.59(17) |  | C6A  | N1A  | C2A  | 120.0     |
| O4  | S2  | O6   | 109.47(17) |  | C5A  | C6A  | N1A  | 120.0     |
| O4  | S2  | C19  | 110.0(5)   |  | C6A  | C5A  | C4A  | 120.0     |
| O6  | S2  | C19  | 105.5(5)   |  | C8A  | C7A  | N2A  | 108(2)    |
| O4A | S2A | C19A | 101.4(6)   |  | C7A  | C8A  | C9A  | 119.2(19) |
| O5A | S2A | O4A  | 108.98(17) |  | N3A  | C9A  | C8A  | 105(2)    |
| O5A | S2A | C19A | 110.5(6)   |  | N2A  | C10A | C11A | 121.6(17) |
| O6A | S2A | O4A  | 117.2(9)   |  | C10A | C11A | C12A | 123(2)    |
| O6A | S2A | O5A  | 109.30(17) |  | C10A | C11A | C13A | 102(2)    |
| O6A | S2A | C19A | 109.2(6)   |  | C12A | C11A | C13A | 107.1(14) |
| C2  | N1  | C6   | 120.0      |  | C15A | C14A | N3A  | 113.8(17) |
| C2  | N1  | C1   | 123.2(5)   |  | C14A | C15A | C16A | 117(2)    |
| C6  | N1  | C1   | 116.7(5)   |  | C14A | C15A | C17A | 118(2)    |
| N1  | C2  | C3   | 120.0      |  | C17A | C15A | C16A | 106.2(14) |
| C4  | C3  | C2   | 120.0      |  | O1A  | S1A  | C18A | 105.2(13) |
| C3  | C4  | C5   | 120.0      |  | O2A  | S1A  | O1A  | 113.8(13) |
| C4  | C5  | C6   | 120.0      |  | O2A  | S1A  | O3A  | 116.1(17) |
| C5  | C6  | N1   | 120.0      |  | O2A  | S1A  | C18A | 91.0(12)  |
| C1  | N2  | C7   | 119.4(6)   |  | O3A  | S1A  | O1A  | 122.8(15) |
| C1  | N2  | C10  | 127.2(6)   |  | O3A  | S1A  | C18A | 100.1(13) |
| C10 | N2  | C7   | 113.1(6)   |  | F1A  | C18A | S1A  | 113.8(15) |
| C1  | N3  | C9   | 120.1(6)   |  | F2A  | C18A | S1A  | 104.4(15) |
| C1  | N3  | C14  | 123.1(6)   |  | F2A  | C18A | F1A  | 131.0(19) |
| C9  | N3  | C14  | 116.8(6)   |  | F2A  | C18A | F3A  | 102(2)    |
| N2  | C1  | N1   | 114.3(6)   |  | F3A  | C18A | S1A  | 93.4(15)  |
| N3  | C1  | N1   | 119.3(6)   |  | F3A  | C18A | F1A  | 104.9(17) |
| N3  | C1  | N2   | 126.4(6)   |  | F6   | C19  | S2   | 113.1(6)  |
| C8  | C7  | N2   | 112.1(7)   |  | F4   | C19  | S2   | 113.6(6)  |
| C7  | C8  | C9   | 116.2(8)   |  | F4   | C19  | F6   | 107.3(2)  |
| N3  | C9  | C8   | 110.6(7)   |  | F4   | C19  | F5   | 107.3(2)  |
| N2  | C10 | C11  | 114.1(6)   |  | F5   | C19  | S2   | 108.0(5)  |



|     |     |     |          |  |    |      |     |           |
|-----|-----|-----|----------|--|----|------|-----|-----------|
| C10 | C11 | C12 | 109.3(7) |  | F5 | C19  | F6  | 107.1(2)  |
| C10 | C11 | C13 | 115.2(9) |  | F7 | C19A | S2A | 102.5(8)  |
| C13 | C11 | C12 | 106.5(7) |  | F7 | C19A | F8  | 132.6(11) |
| C15 | C14 | N3  | 115.6(7) |  | F9 | C19A | S2A | 96.8(9)   |
| C14 | C15 | C16 | 109.7(8) |  | F9 | C19A | F7  | 107.3(2)  |
| C14 | C15 | C17 | 114.7(8) |  | F9 | C19A | F8  | 107.3(2)  |
| C17 | C15 | C16 | 109.1(8) |  | F8 | C19A | S2A | 104.6(10) |

**Table 14. Torsion Angles for 4h.**

| A   | B   | C    | D  | Angle/°   | A   | B    | C    | D    | Angle/°    |
|-----|-----|------|----|-----------|-----|------|------|------|------------|
| O1  | S1  | C18  | F1 | 54.2(8)   | C9  | N3   | C1   | N1   | 179.8(9)   |
| O1  | S1  | C18  | F2 | 171.0(8)  | C9  | N3   | C1   | N2   | -2.2(16)   |
| O1  | S1  | C18  | F3 | -60.4(7)  | C9  | N3   | C14  | C15  | -56.5(12)  |
| O2  | S1  | C18  | F1 | 173.1(7)  | C10 | N2   | C1   | N1   | -2.0(13)   |
| O2  | S1  | C18  | F2 | -70.2(8)  | C10 | N2   | C1   | N3   | 179.9(9)   |
| O2  | S1  | C18  | F3 | 58.4(7)   | C10 | N2   | C7   | C8   | -158.6(9)  |
| O3  | S1  | C18  | F1 | -66.1(9)  | C14 | N3   | C1   | N1   | -0.9(14)   |
| O3  | S1  | C18  | F2 | 50.7(9)   | C14 | N3   | C1   | N2   | 177.1(9)   |
| O3  | S1  | C18  | F3 | 179.3(8)  | C14 | N3   | C9   | C8   | 158.5(9)   |
| O4A | S2A | C19A | F7 | 71.8(7)   | N2A | C1A  | N1A  | C2A  | 98(3)      |
| O4A | S2A | C19A | F9 | -178.8(7) | N2A | C1A  | N1A  | C6A  | -75(3)     |
| O4A | S2A | C19A | F8 | -68.9(8)  | N2A | C7A  | C8A  | C9A  | 46(4)      |
| O5A | S2A | C19A | F7 | -172.8(7) | N2A | C10A | C11A | C12A | 177(2)     |
| O5A | S2A | C19A | F9 | -63.4(6)  | N2A | C10A | C11A | C13A | 58(3)      |
| O5A | S2A | C19A | F8 | 46.5(7)   | N3A | C1A  | N1A  | C2A  | -89(2)     |
| O5  | S2  | C19  | F6 | -64.1(6)  | N3A | C1A  | N1A  | C6A  | 98(2)      |
| O5  | S2  | C19  | F4 | 58.6(6)   | N3A | C14A | C15A | C16A | 62(3)      |
| O5  | S2  | C19  | F5 | 177.5(5)  | N3A | C14A | C15A | C17A | -169(2)    |
| O6A | S2A | C19A | F7 | -52.5(9)  | C1A | N2A  | C7A  | C8A  | -19(3)     |
| O6A | S2A | C19A | F9 | 56.9(8)   | C1A | N2A  | C10A | C11A | -120(3)    |
| O6A | S2A | C19A | F8 | 166.8(8)  | C1A | N3A  | C9A  | C8A  | 34(3)      |
| O4  | S2  | C19  | F6 | 176.2(5)  | C1A | N3A  | C14A | C15A | -123(3)    |
| O4  | S2  | C19  | F4 | -61.2(6)  | C1A | N1A  | C6A  | C5A  | 174.0(14)  |
| O4  | S2  | C19  | F5 | 57.8(5)   | C4A | C3A  | C2A  | N1A  | 0.0        |
| O6  | S2  | C19  | F6 | 58.2(6)   | C3A | C4A  | C5A  | C6A  | 0.0        |
| O6  | S2  | C19  | F4 | -179.2(6) | C3A | C2A  | N1A  | C1A  | -173.3(16) |
| O6  | S2  | C19  | F5 | -60.2(6)  | C3A | C2A  | N1A  | C6A  | 0.0        |
| N1  | C2  | C3   | C4 | 0.0       | C2A | N1A  | C6A  | C5A  | 0.0        |
| C2  | N1  | C6   | C5 | 0.0       | N1A | C6A  | C5A  | C4A  | 0.0        |
| C2  | N1  | C1   | N2 | -97.5(9)  | C5A | C4A  | C3A  | C2A  | 0.0        |
| C2  | N1  | C1   | N3 | 80.7(9)   | C7A | N2A  | C1A  | N3A  | 3(4)       |
| C2  | C3  | C4   | C5 | 0.0       | C7A | N2A  | C1A  | N1A  | 175(2)     |
| C3  | C4  | C5   | C6 | 0.0       | C7A | N2A  | C10A | C11A | 60(3)      |

|    |     |     |     |           |      |     |      |      |            |
|----|-----|-----|-----|-----------|------|-----|------|------|------------|
| C4 | C5  | C6  | N1  | 0.0       | C7A  | C8A | C9A  | N3A  | -53(4)     |
| C6 | N1  | C2  | C3  | 0.0       | C9A  | N3A | C1A  | N2A  | -12(4)     |
| C6 | N1  | C1  | N2  | 85.9(8)   | C9A  | N3A | C1A  | N1A  | 175(2)     |
| C6 | N1  | C1  | N3  | -95.8(9)  | C9A  | N3A | C14A | C15A | 63(3)      |
| N2 | C7  | C8  | C9  | -41.0(15) | C10A | N2A | C1A  | N3A  | -178(2)    |
| N2 | C10 | C11 | C12 | 177.3(8)  | C10A | N2A | C1A  | N1A  | -5(4)      |
| N2 | C10 | C11 | C13 | -62.8(11) | C10A | N2A | C7A  | C8A  | 162(2)     |
| N3 | C14 | C15 | C16 | -56.7(11) | C14A | N3A | C1A  | N2A  | 175(2)     |
| N3 | C14 | C15 | C17 | -179.8(8) | C14A | N3A | C1A  | N1A  | 1(3)       |
| C1 | N1  | C2  | C3  | -176.5(6) | C14A | N3A | C9A  | C8A  | -152(2)    |
| C1 | N1  | C6  | C5  | 176.7(5)  | O1A  | S1A | C18A | F1A  | 95(2)      |
| C1 | N2  | C7  | C8  | 16.1(14)  | O1A  | S1A | C18A | F2A  | -53.7(18)  |
| C1 | N2  | C10 | C11 | 125.6(10) | O1A  | S1A | C18A | F3A  | -157.4(17) |
| C1 | N3  | C9  | C8  | -22.1(15) | O2A  | S1A | C18A | F1A  | -150(2)    |
| C1 | N3  | C14 | C15 | 124.1(10) | O2A  | S1A | C18A | F2A  | 61.3(18)   |
| C7 | N2  | C1  | N1  | -175.9(8) | O2A  | S1A | C18A | F3A  | -42.3(17)  |
| C7 | N2  | C1  | N3  | 6.0(15)   | O3A  | S1A | C18A | F1A  | -33(2)     |
| C7 | N2  | C10 | C11 | -60.2(11) | O3A  | S1A | C18A | F2A  | 178.1(18)  |
| C7 | C8  | C9  | N3  | 44.0(16)  | O3A  | S1A | C18A | F3A  | 74(2)      |

**Table 15. Hydrogen Atom Coordinates ( $\text{\AA} \times 10^4$ ) and Isotropic Displacement Parameters ( $\text{\AA}^2 \times 10^3$ ) for 4h.**

| Atom | x     | y    | z    | U(eq) |
|------|-------|------|------|-------|
| H2   | -105  | 5540 | 1143 | 83    |
| H3   | -1905 | 5981 | 282  | 100   |
| H4   | -3865 | 5885 | 667  | 100   |
| H5   | -4026 | 5348 | 1912 | 86    |
| H6   | -2226 | 4907 | 2773 | 75    |
| H7A  | 1092  | 3142 | 3488 | 134   |
| H7B  | 2087  | 3561 | 3020 | 134   |
| H8A  | 2542  | 4213 | 4165 | 133   |
| H8B  | 1125  | 4348 | 4239 | 133   |
| H9A  | 1807  | 5788 | 4066 | 129   |
| H9B  | 2551  | 5476 | 3403 | 129   |
| H10A | -1041 | 3566 | 1817 | 95    |
| H10B | -749  | 2905 | 2545 | 95    |
| H11  | 1102  | 2426 | 2145 | 115   |
| H12A | -713  | 1533 | 1717 | 177   |
| H12B | 109   | 1536 | 1050 | 177   |
| H12C | -1087 | 2172 | 980  | 177   |
| H13A | 419   | 3244 | 658  | 197   |
| H13B | 1749  | 2866 | 1040 | 197   |
| H13C | 1270  | 3820 | 1315 | 197   |

|      |       |      |      |     |
|------|-------|------|------|-----|
| H14A | 1051  | 6904 | 2721 | 108 |
| H14B | -380  | 6644 | 2522 | 108 |
| H15  | 918   | 7041 | 4014 | 124 |
| H16A | -1615 | 6478 | 3556 | 206 |
| H16B | -1164 | 6966 | 4366 | 206 |
| H16C | -598  | 6000 | 4189 | 206 |
| H17A | 393   | 8382 | 3215 | 171 |
| H17B | -150  | 8389 | 4002 | 171 |
| H17C | -1031 | 8144 | 3209 | 171 |
| H4A  | -3565 | 6058 | 519  | 90  |
| H3A  | -4037 | 5081 | 1497 | 67  |
| H2A  | -2447 | 4586 | 2491 | 60  |
| H6A  | 88    | 6045 | 1529 | 65  |
| H5A  | -1503 | 6540 | 535  | 86  |
| H7AA | 1817  | 3475 | 3342 | 98  |
| H7AB | 2669  | 3939 | 2795 | 98  |
| H8AA | 2617  | 5291 | 3355 | 153 |
| H8AB | 2880  | 4579 | 4044 | 153 |
| H9AA | 882   | 4764 | 4311 | 103 |
| H9AB | 1493  | 5757 | 4275 | 103 |
| H10C | 1270  | 3917 | 1483 | 111 |
| H10D | -172  | 4053 | 1456 | 111 |
| H11A | 1149  | 2488 | 2053 | 116 |
| H12D | -733  | 2415 | 696  | 181 |
| H12E | 72    | 1575 | 1082 | 181 |
| H12F | 706   | 2350 | 644  | 181 |
| H13D | -668  | 2063 | 2433 | 172 |
| H13E | -1496 | 2702 | 1815 | 172 |
| H13F | -689  | 3139 | 2568 | 172 |
| H14C | -1215 | 6319 | 2994 | 115 |
| H14D | -970  | 6077 | 3891 | 115 |
| H15A | 820   | 6944 | 4042 | 123 |
| H16D | 266   | 7380 | 2463 | 157 |
| H16E | 1587  | 7218 | 2988 | 157 |
| H16F | 875   | 8160 | 3039 | 157 |
| H17D | -1060 | 7681 | 4303 | 176 |
| H17E | -1094 | 8214 | 3508 | 176 |
| H17F | 52    | 8345 | 4193 | 176 |

**Table 16. Atomic Occupancy for 4h.**

| Atom | Occupancy | Atom | Occupancy | Atom | Occupancy |
|------|-----------|------|-----------|------|-----------|
| S1   | 0.713(13) | F1   | 0.713(13) | F2   | 0.713(13) |
| F3   | 0.713(13) | O1   | 0.713(13) | O2   | 0.713(13) |

|      |           |  |      |           |  |      |           |
|------|-----------|--|------|-----------|--|------|-----------|
| O3   | 0.713(13) |  | C18  | 0.713(13) |  | S2   | 0.587(5)  |
| S2A  | 0.413(5)  |  | O4A  | 0.413(5)  |  | O5A  | 0.413(5)  |
| O5   | 0.587(5)  |  | O6A  | 0.413(5)  |  | O4   | 0.587(5)  |
| O6   | 0.587(5)  |  | N1   | 0.749(5)  |  | C2   | 0.749(5)  |
| H2   | 0.749(5)  |  | C3   | 0.749(5)  |  | H3   | 0.749(5)  |
| C4   | 0.749(5)  |  | H4   | 0.749(5)  |  | C5   | 0.749(5)  |
| H5   | 0.749(5)  |  | C6   | 0.749(5)  |  | H6   | 0.749(5)  |
| N2   | 0.749(5)  |  | N3   | 0.749(5)  |  | C1   | 0.749(5)  |
| C7   | 0.749(5)  |  | H7A  | 0.749(5)  |  | H7B  | 0.749(5)  |
| C8   | 0.749(5)  |  | H8A  | 0.749(5)  |  | H8B  | 0.749(5)  |
| C9   | 0.749(5)  |  | H9A  | 0.749(5)  |  | H9B  | 0.749(5)  |
| C10  | 0.749(5)  |  | H10A | 0.749(5)  |  | H10B | 0.749(5)  |
| C11  | 0.749(5)  |  | H11  | 0.749(5)  |  | C12  | 0.749(5)  |
| H12A | 0.749(5)  |  | H12B | 0.749(5)  |  | H12C | 0.749(5)  |
| C13  | 0.749(5)  |  | H13A | 0.749(5)  |  | H13B | 0.749(5)  |
| H13C | 0.749(5)  |  | C14  | 0.749(5)  |  | H14A | 0.749(5)  |
| H14B | 0.749(5)  |  | C15  | 0.749(5)  |  | H15  | 0.749(5)  |
| C16  | 0.749(5)  |  | H16A | 0.749(5)  |  | H16B | 0.749(5)  |
| H16C | 0.749(5)  |  | C17  | 0.749(5)  |  | H17A | 0.749(5)  |
| H17B | 0.749(5)  |  | H17C | 0.749(5)  |  | N2A  | 0.251(5)  |
| N3A  | 0.251(5)  |  | C1A  | 0.251(5)  |  | C4A  | 0.251(5)  |
| H4A  | 0.251(5)  |  | C3A  | 0.251(5)  |  | H3A  | 0.251(5)  |
| C2A  | 0.251(5)  |  | H2A  | 0.251(5)  |  | N1A  | 0.251(5)  |
| C6A  | 0.251(5)  |  | H6A  | 0.251(5)  |  | C5A  | 0.251(5)  |
| H5A  | 0.251(5)  |  | C7A  | 0.251(5)  |  | H7AA | 0.251(5)  |
| H7AB | 0.251(5)  |  | C8A  | 0.251(5)  |  | H8AA | 0.251(5)  |
| H8AB | 0.251(5)  |  | C9A  | 0.251(5)  |  | H9AA | 0.251(5)  |
| H9AB | 0.251(5)  |  | C10A | 0.251(5)  |  | H10C | 0.251(5)  |
| H10D | 0.251(5)  |  | C11A | 0.251(5)  |  | H11A | 0.251(5)  |
| C12A | 0.251(5)  |  | H12D | 0.251(5)  |  | H12E | 0.251(5)  |
| H12F | 0.251(5)  |  | C13A | 0.251(5)  |  | H13D | 0.251(5)  |
| H13E | 0.251(5)  |  | H13F | 0.251(5)  |  | C14A | 0.251(5)  |
| H14C | 0.251(5)  |  | H14D | 0.251(5)  |  | C15A | 0.251(5)  |
| H15A | 0.251(5)  |  | C16A | 0.251(5)  |  | H16D | 0.251(5)  |
| H16E | 0.251(5)  |  | H16F | 0.251(5)  |  | C17A | 0.251(5)  |
| H17D | 0.251(5)  |  | H17E | 0.251(5)  |  | H17F | 0.251(5)  |
| S1A  | 0.287(13) |  | O1A  | 0.287(13) |  | O2A  | 0.287(13) |
| O3A  | 0.287(13) |  | F1A  | 0.287(13) |  | F2A  | 0.287(13) |
| F3A  | 0.287(13) |  | C18A | 0.287(13) |  | F6   | 0.587(5)  |
| F4   | 0.587(5)  |  | F5   | 0.587(5)  |  | C19  | 0.587(5)  |
| F7   | 0.413(5)  |  | F9   | 0.413(5)  |  | F8   | 0.413(5)  |

## 25. Different pyridine C-4 selective functionalizations via C-C bond formation

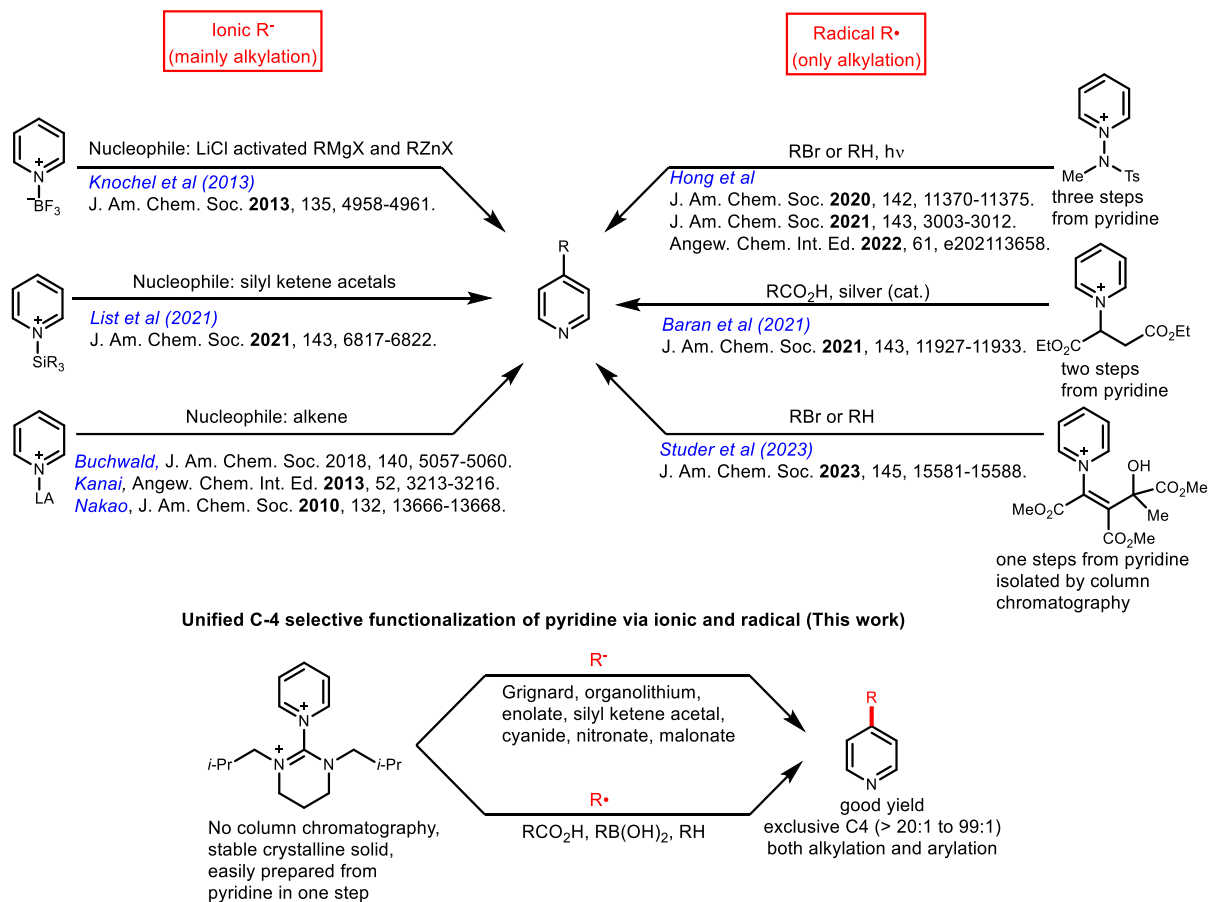

Figure S26. different pyridine C-4 selective functionalization strategies

## 26. References

- [1] N. Bormann, J. S. Ward, A. K. Bergmann, P. Wenz, K. Rissanen, Y. Gong, W.-B. Hatz, A. Burbaum, F. F. Mulks, *Chemistry – A European Journal* **2023**, 29, e202302089.
- [2] Y. Weng, C. Zhang, Z. Tang, M. Shrestha, W. Huang, J. Qu, Y. Chen, *Nature Communications* **2020**, 11, 392.
- [3] J. Choi, G. Laudadio, E. Godineau, P. S. Baran, *Journal of the American Chemical Society* **2021**, 143, 11927-11933.
- [4] I. B. Seiple, S. Su, R. A. Rodriguez, R. Gianatassio, Y. Fujiwara, A. L. Sobel, P. S. Baran, *Journal of the American Chemical Society* **2010**, 132, 13194-13196.
- [5] Han, W.; Jin, F.; Zhao, Q.; Du, H.; Yao, L. *Synlett* **2016**, 27, 1854.

## 27. Copies of NMR spectroscopy

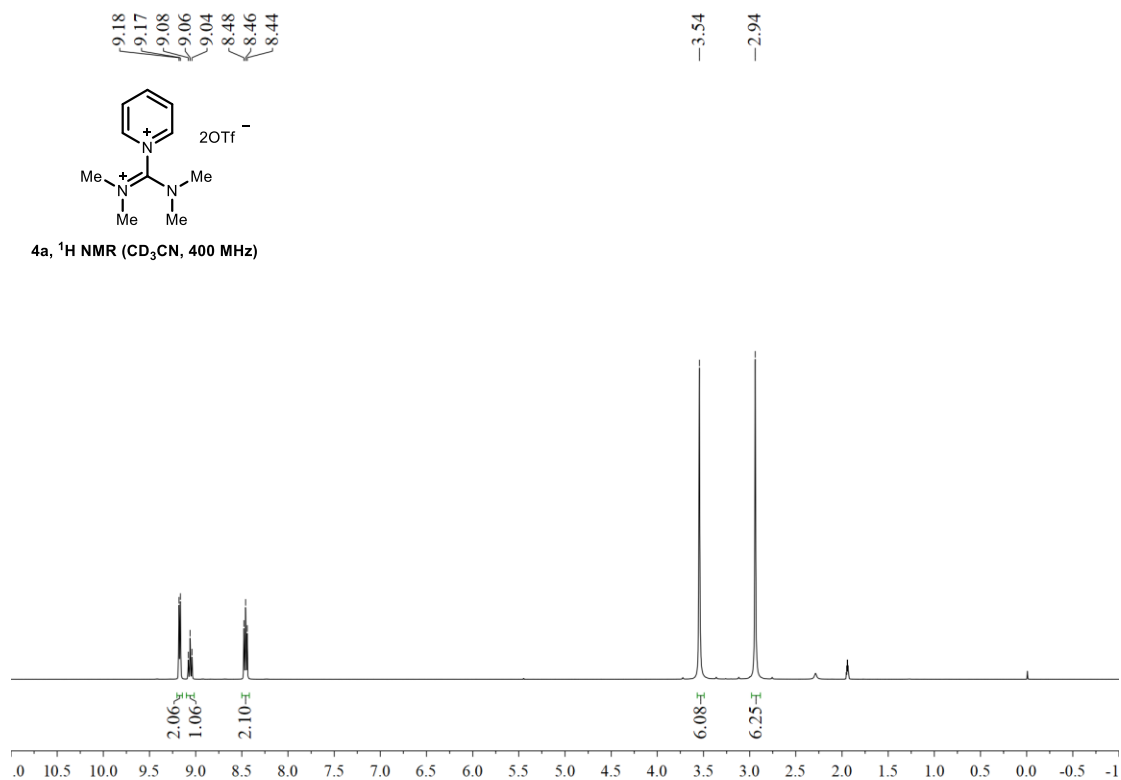

Figure S27.  $^1\text{H}$  NMR of 4a ( $\text{CD}_3\text{CN}$ , 400 MHz)

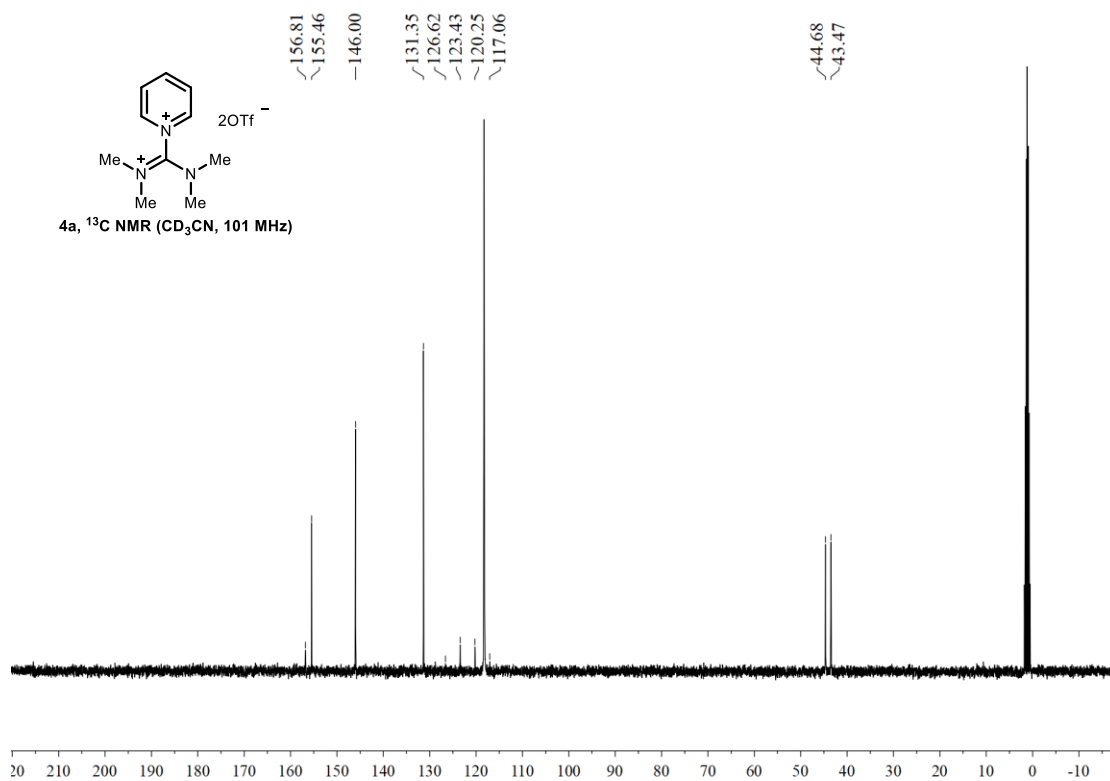

Figure S28.  $^{13}\text{C}$  NMR of 4a ( $\text{CD}_3\text{CN}$ , 101 MHz)

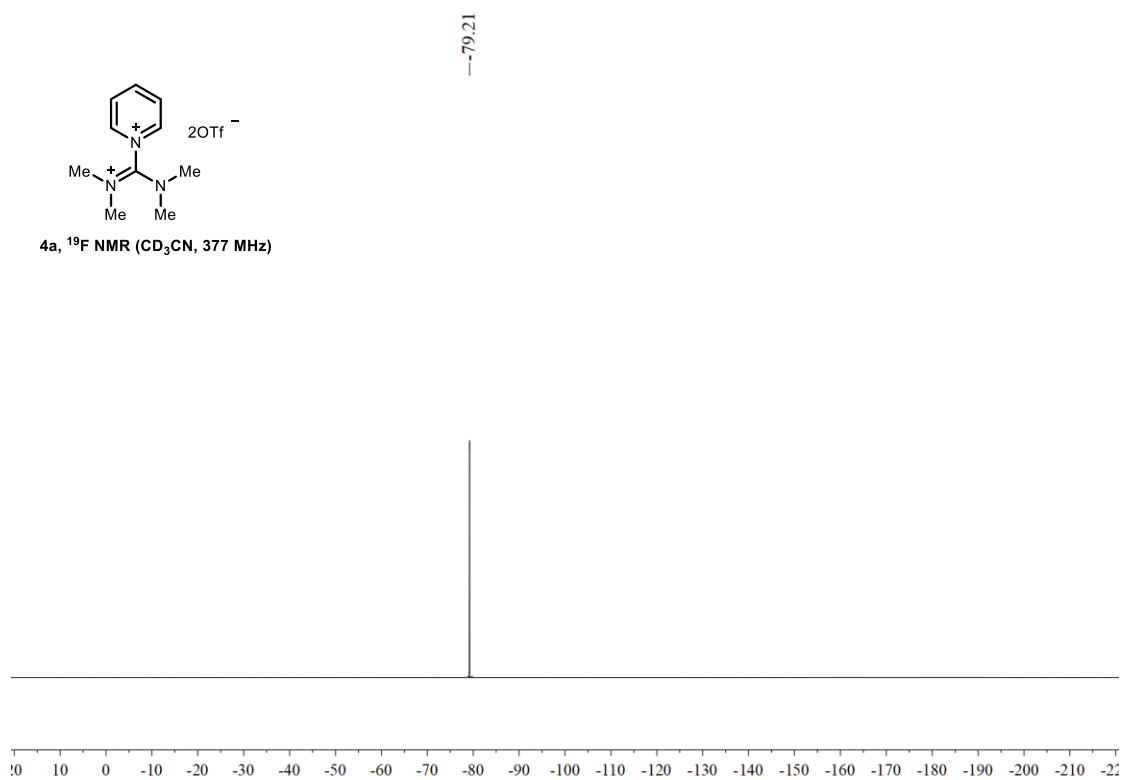

**Figure S29.** <sup>19</sup>F NMR of **4a** (CD<sub>3</sub>CN, 377 MHz)

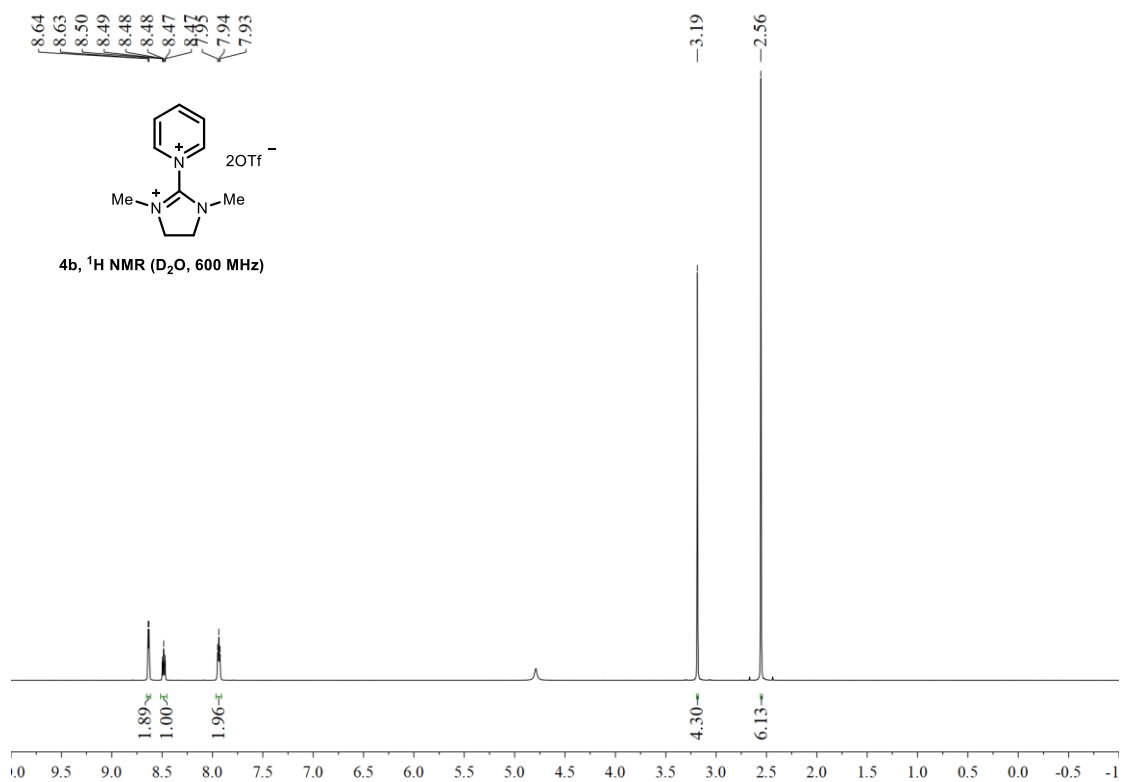

**Figure S30.** <sup>1</sup>H NMR of **4b** (D<sub>2</sub>O, 600 MHz)

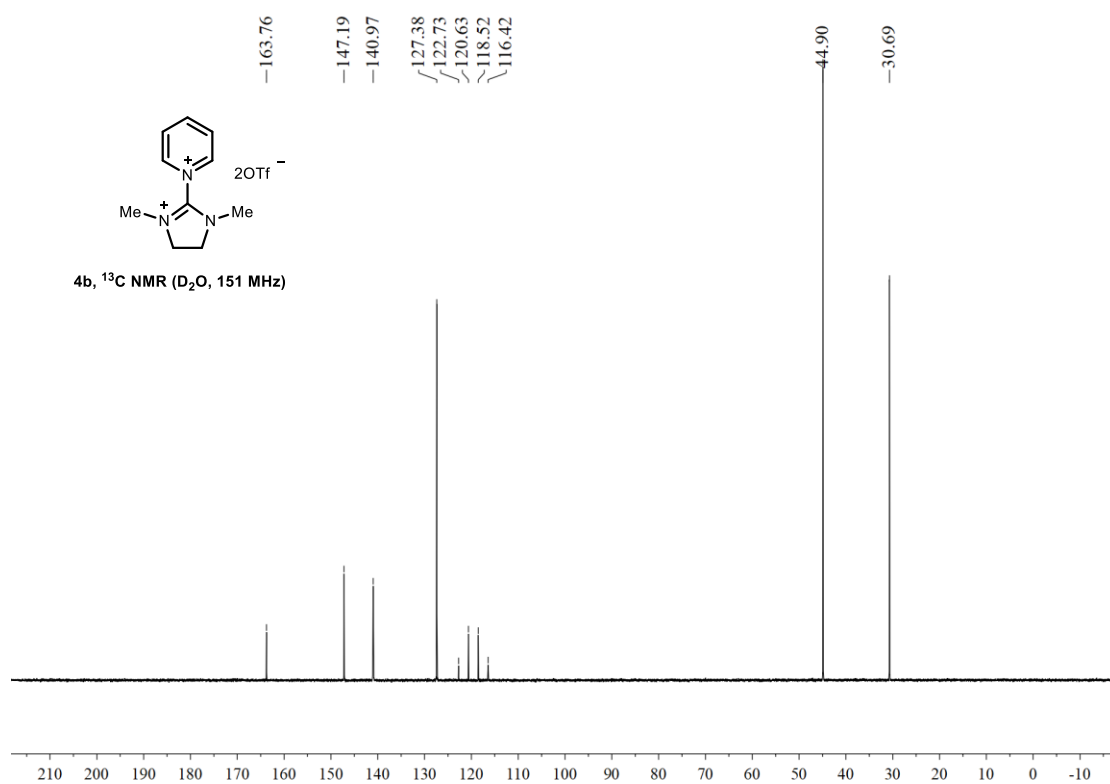

**Figure S31.** <sup>13</sup>C NMR of **4b** (D<sub>2</sub>O, 151 MHz)



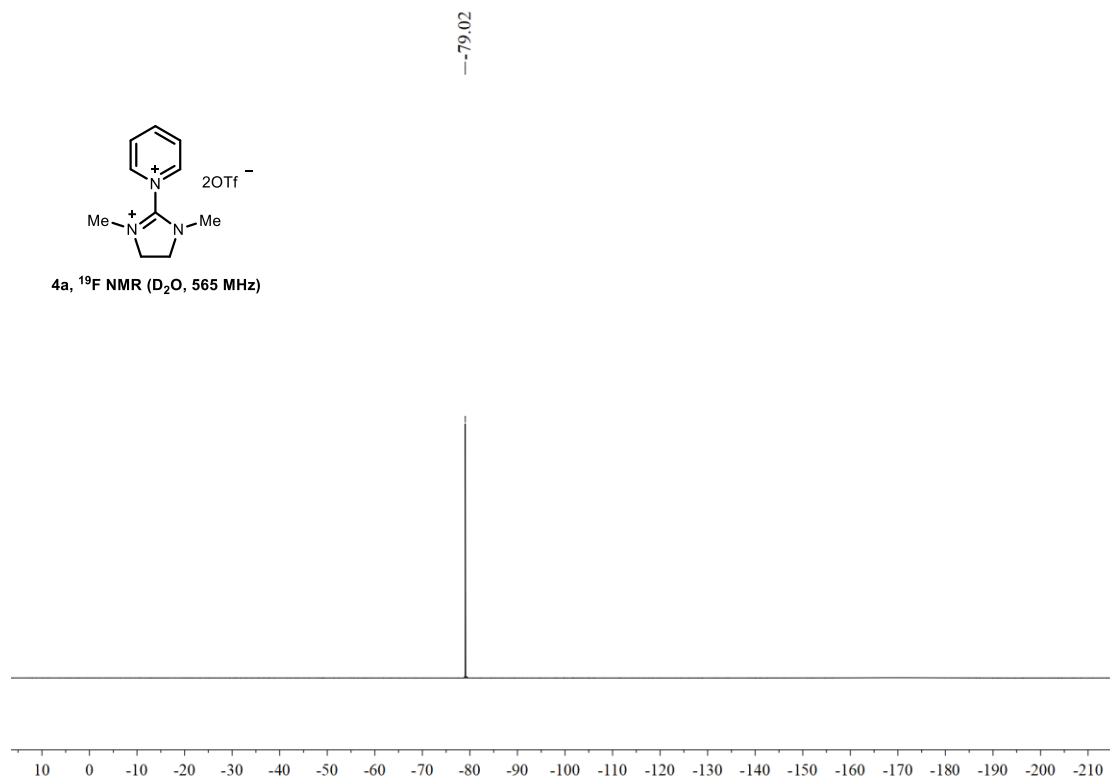

**Figure S32.** <sup>19</sup>F NMR of **4b** (D<sub>2</sub>O, 565 MHz)

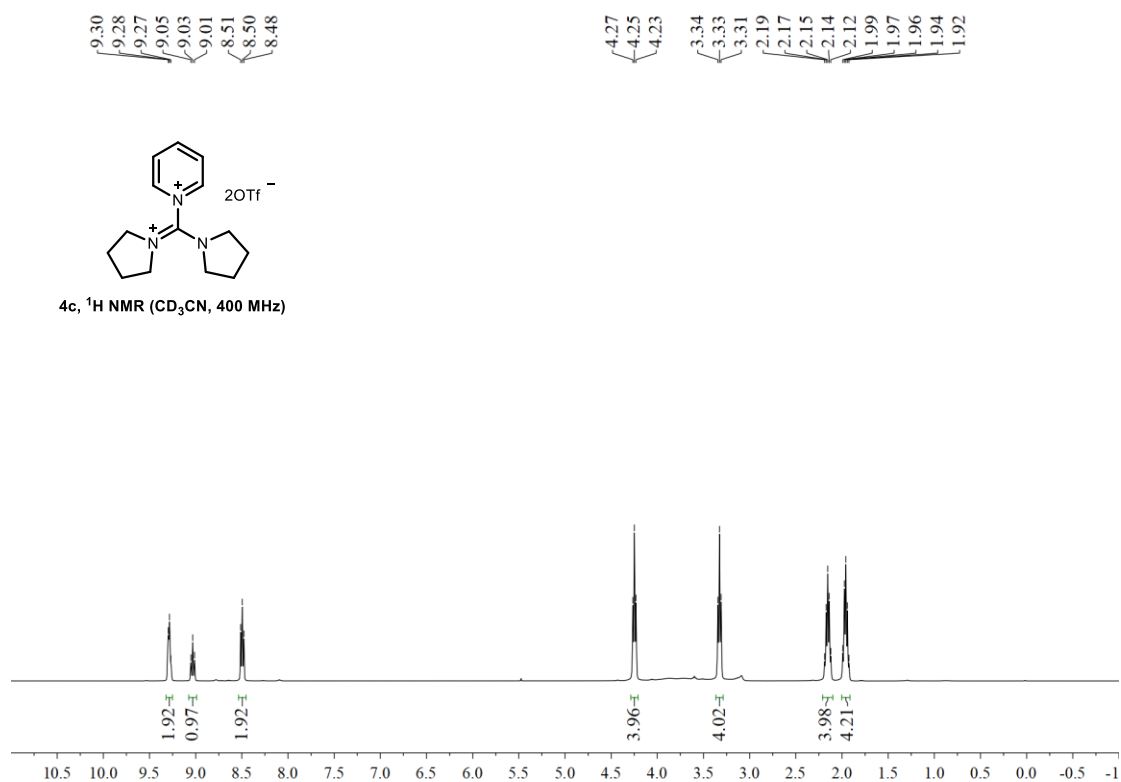

Figure S33. <sup>1</sup>H NMR of 4c (CD<sub>3</sub>CN, 400 MHz)

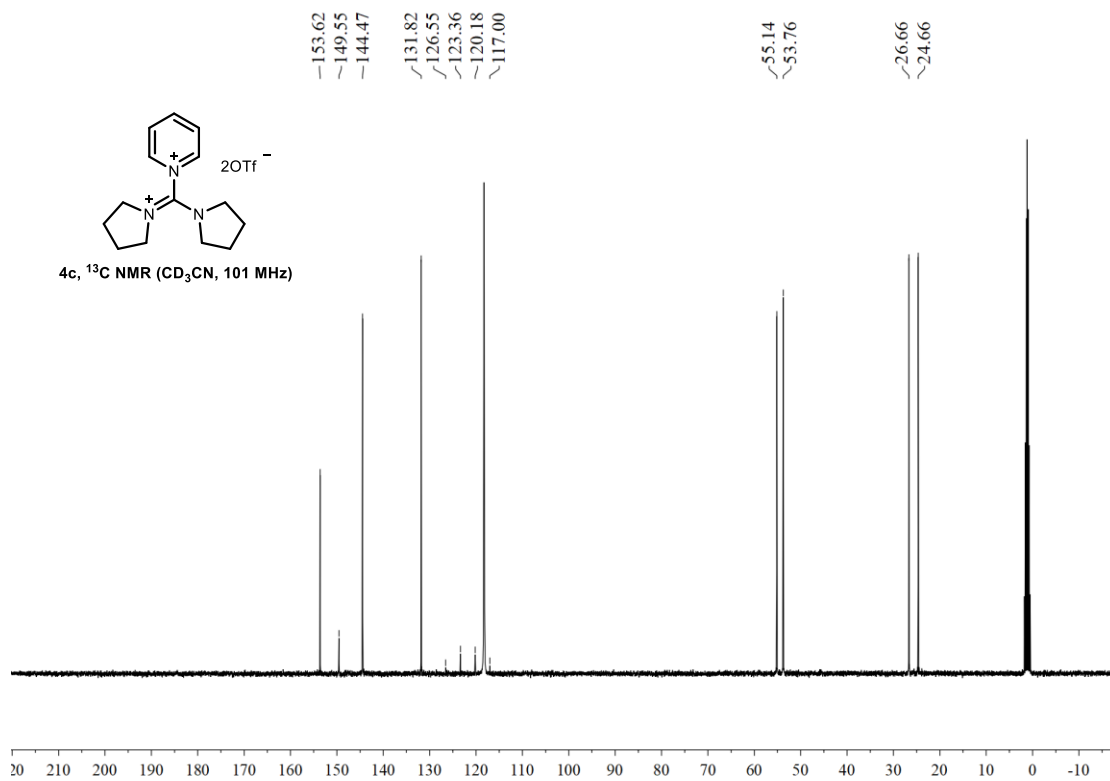

Figure S34. <sup>13</sup>C NMR of 4c (CD<sub>3</sub>CN, 101 MHz)

--79.21

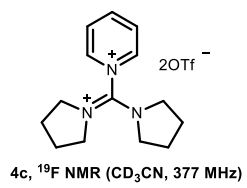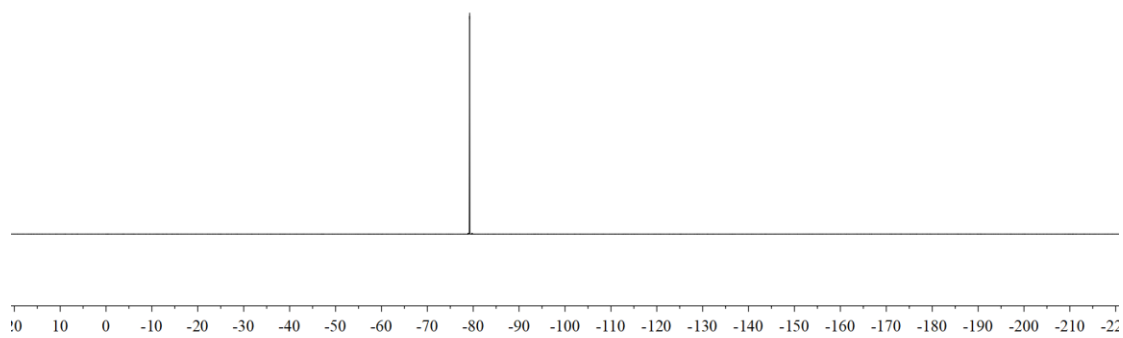

**Figure S35.**  $^{19}\text{F}$  NMR of **4c** ( $\text{CD}_3\text{CN}$ , 377 MHz)

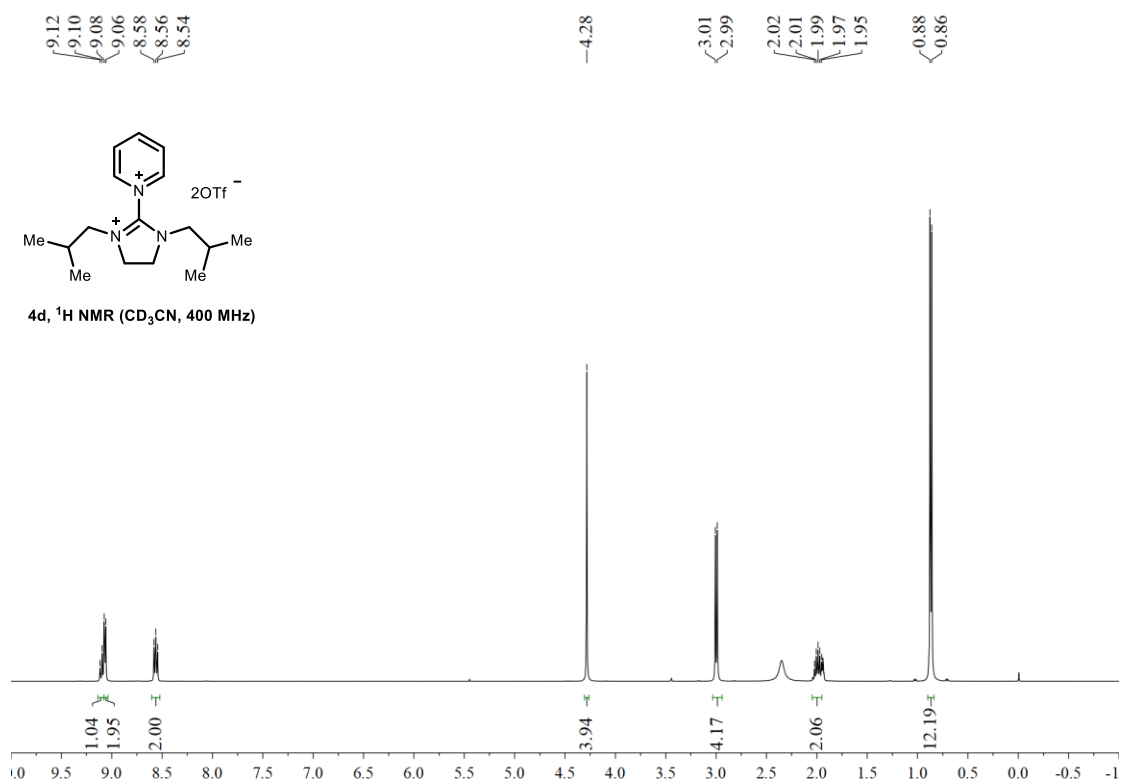

**Figure S36.  $^1\text{H}$  NMR of 4d ( $\text{CD}_3\text{CN}$ , 400 MHz)**

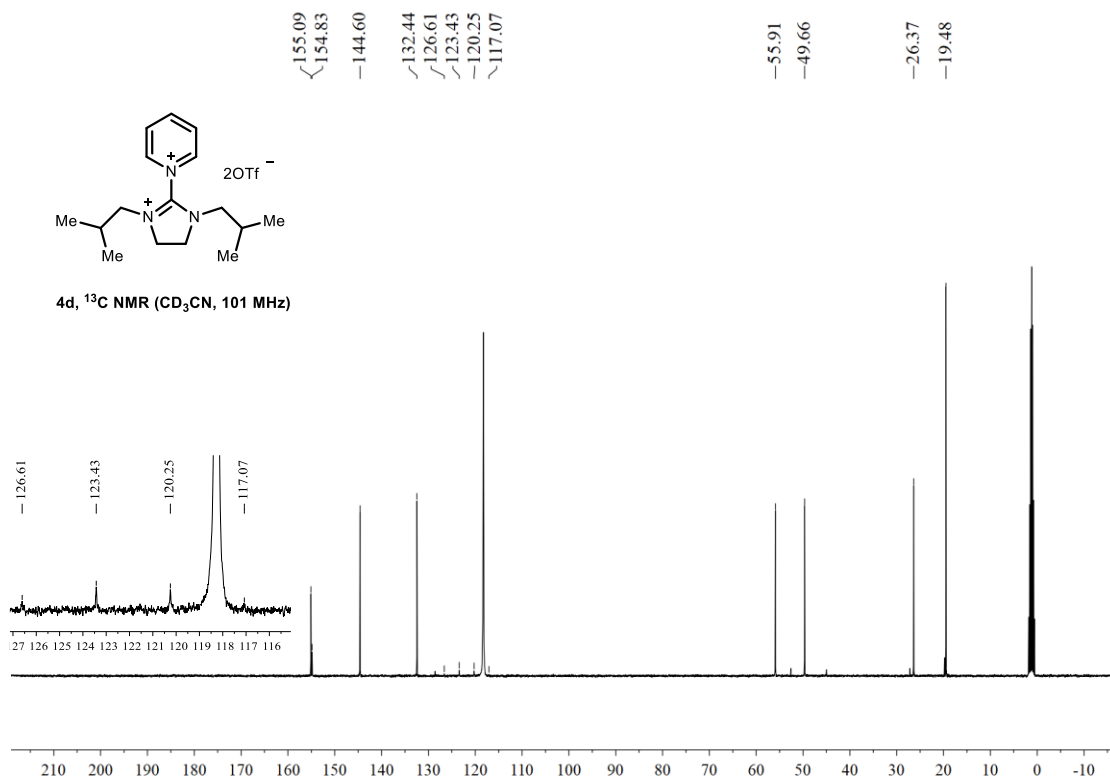

**Figure S37.  $^{13}\text{C}$  NMR of 4d ( $\text{CD}_3\text{CN}$ , 101 MHz)**

--79.19

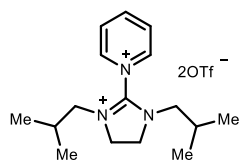

4d, <sup>19</sup>F NMR (CD<sub>3</sub>CN, 377 MHz)

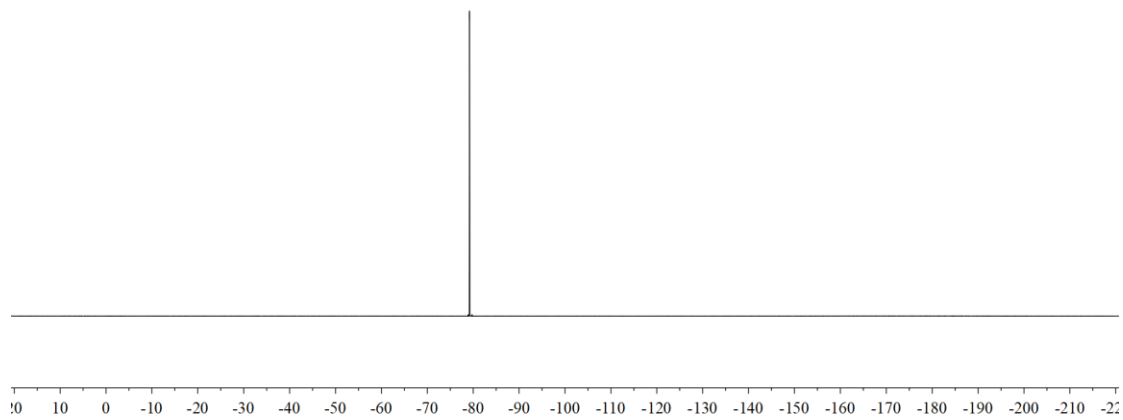

Figure S38. <sup>19</sup>F NMR of 4d (CD<sub>3</sub>CN, 377 MHz)

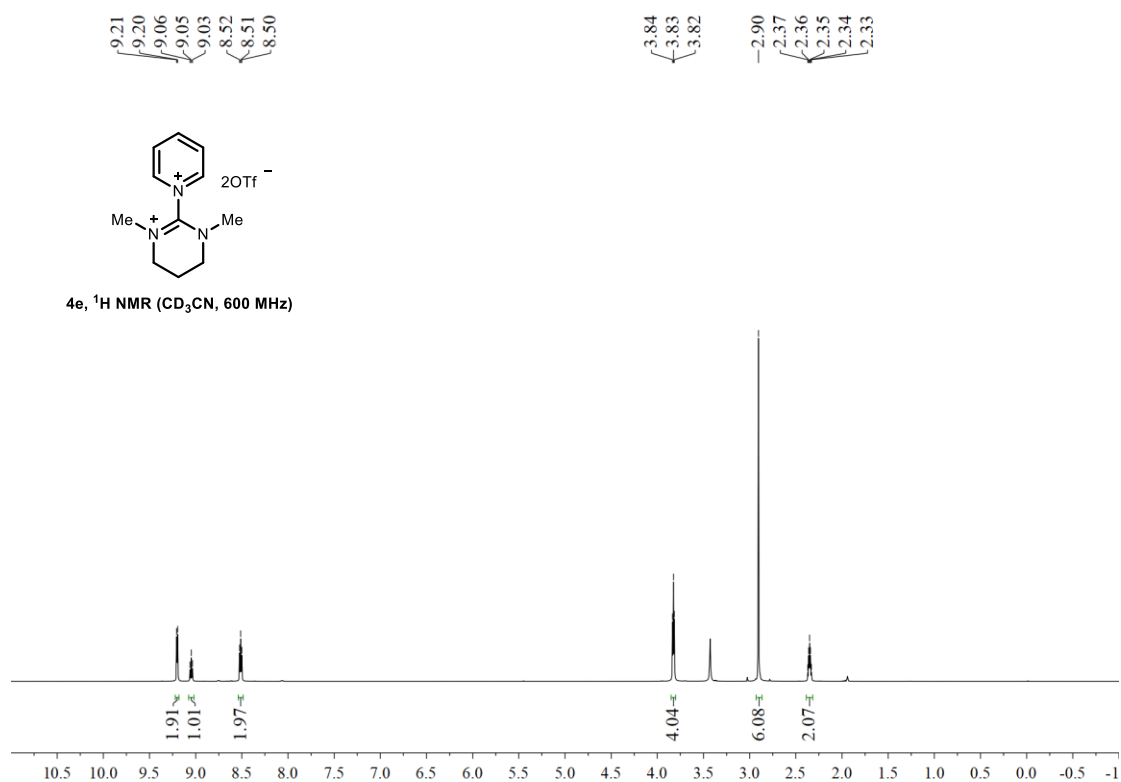

**Figure S39.**  $^1\text{H}$  NMR of **4e** ( $\text{CD}_3\text{CN}$ , 600 MHz)

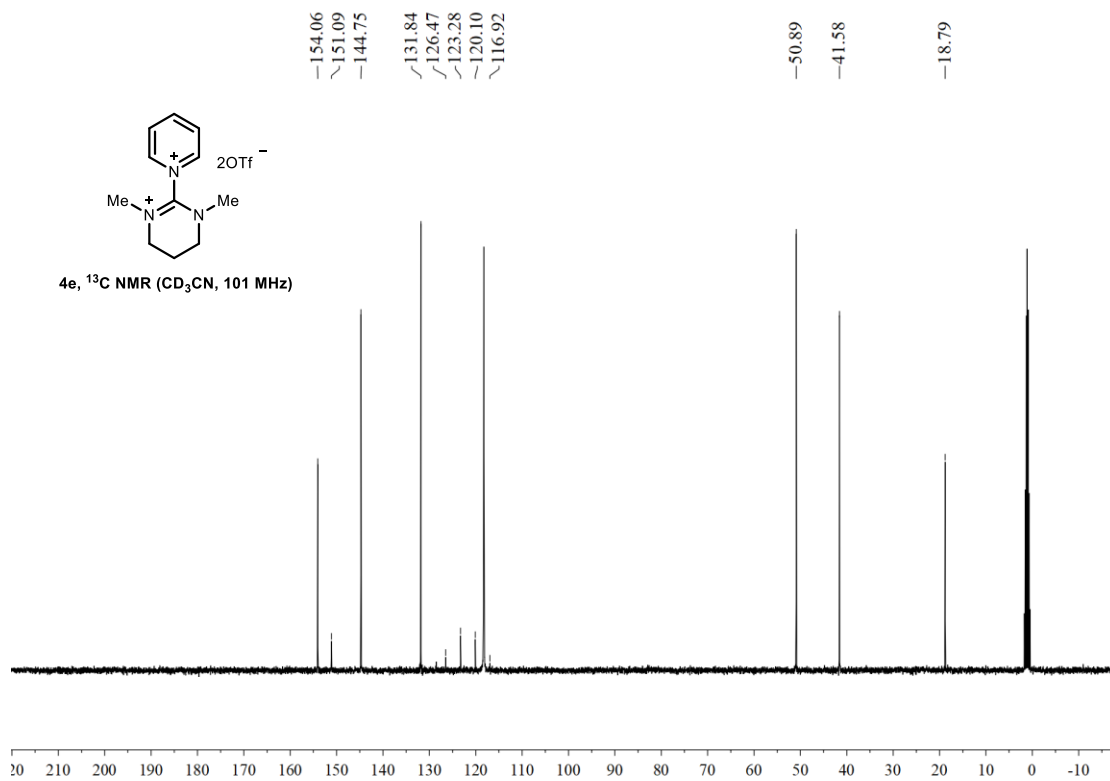

**Figure S40.**  $^{13}\text{C}$  NMR of **4e** ( $\text{CD}_3\text{CN}$ , 101 MHz)

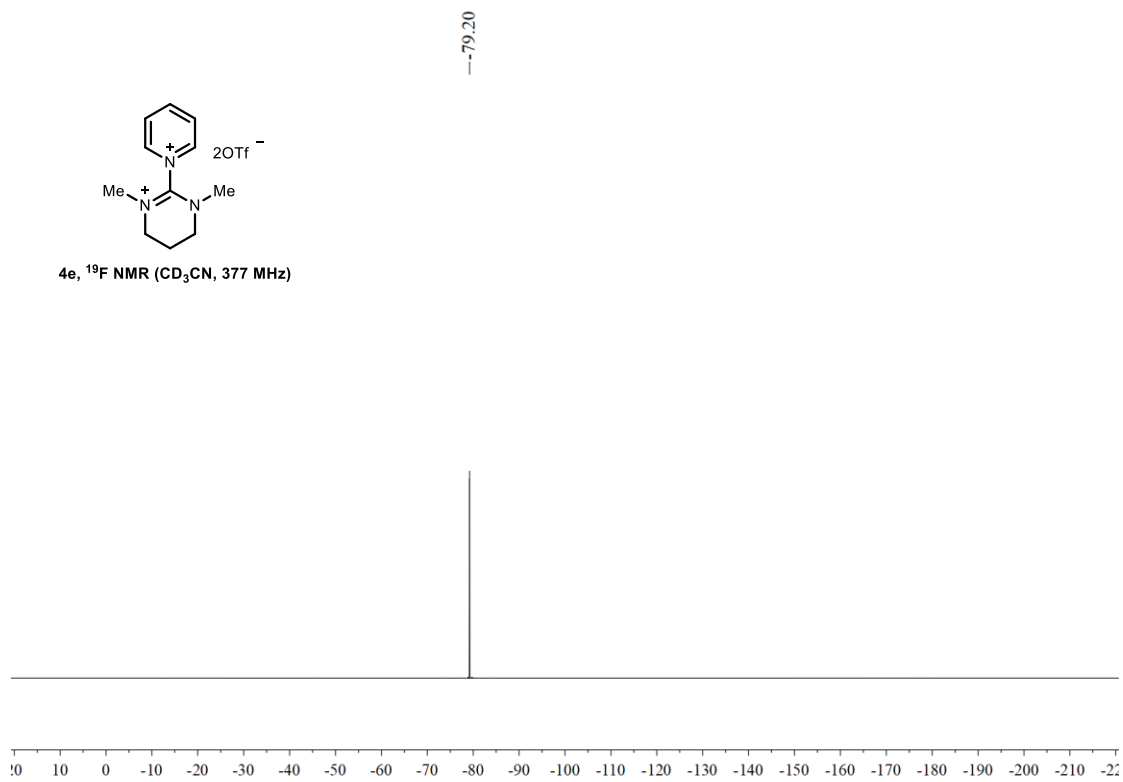

**Figure S41.** <sup>19</sup>F NMR of **4e** (CD<sub>3</sub>CN, 377 MHz)

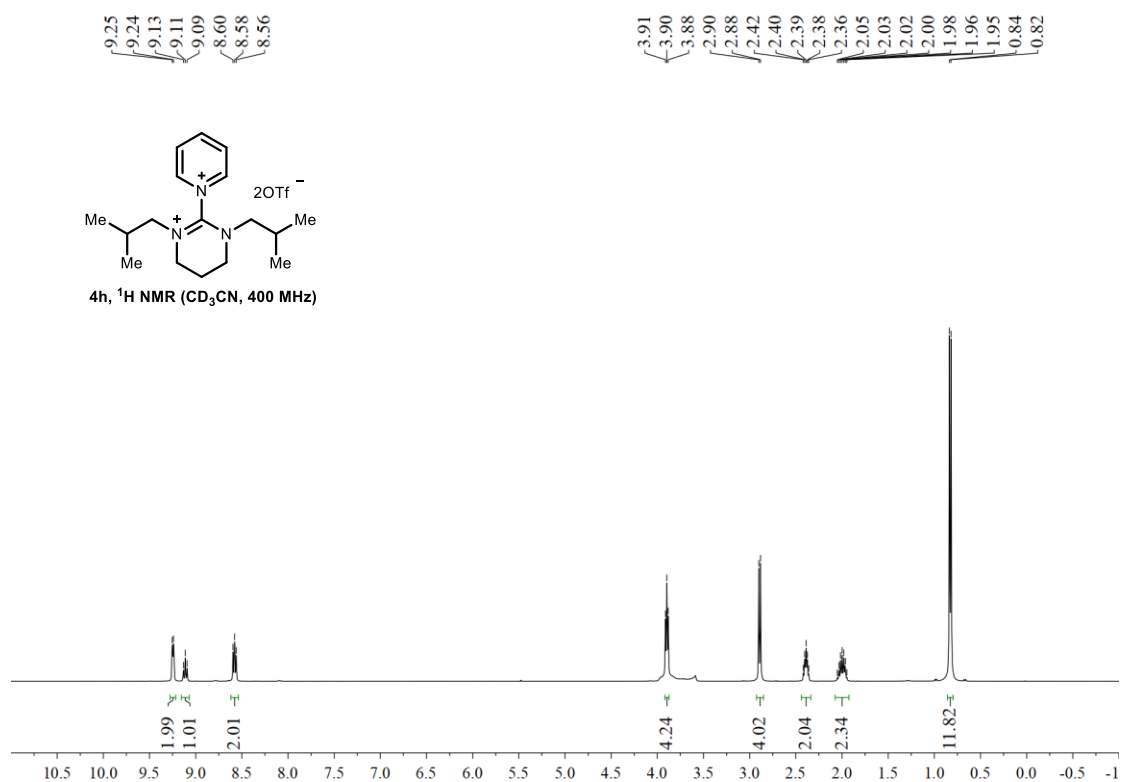

**Figure S42.**  $^1\text{H}$  NMR of **4h** ( $\text{CD}_3\text{CN}$ , 400 MHz)

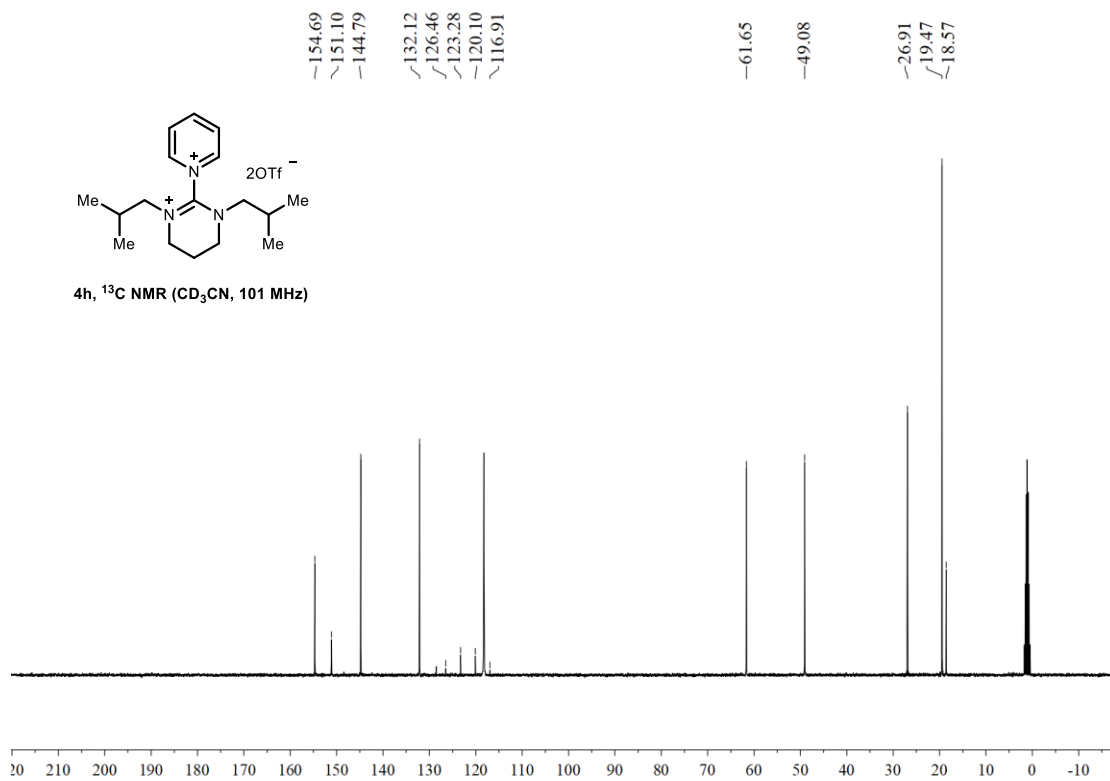

**Figure S43.**  $^{13}\text{C}$  NMR of **4h** ( $\text{CD}_3\text{CN}$ , 101 MHz)



--79.13

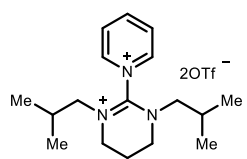

4h,  $^{19}\text{F}$  NMR ( $\text{CD}_3\text{CN}$ , 565 MHz)

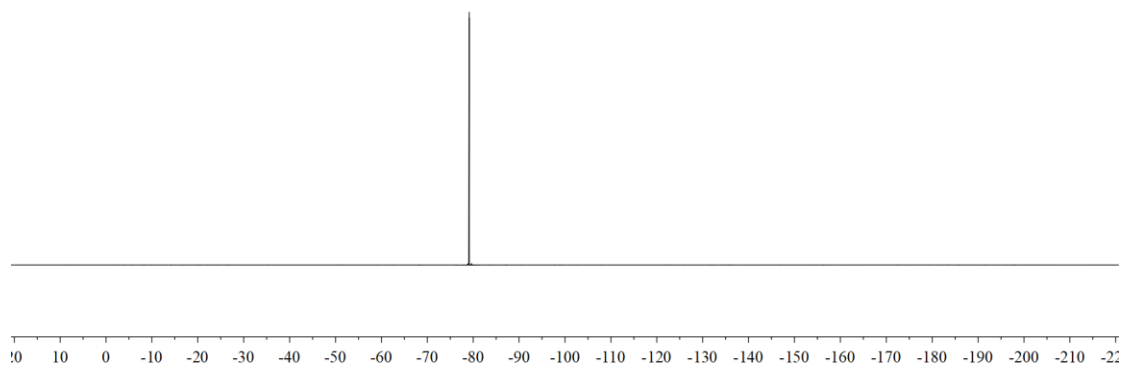

Figure S44.  $^{19}\text{F}$  NMR of 4h ( $\text{CD}_3\text{CN}$ , 565 MHz)

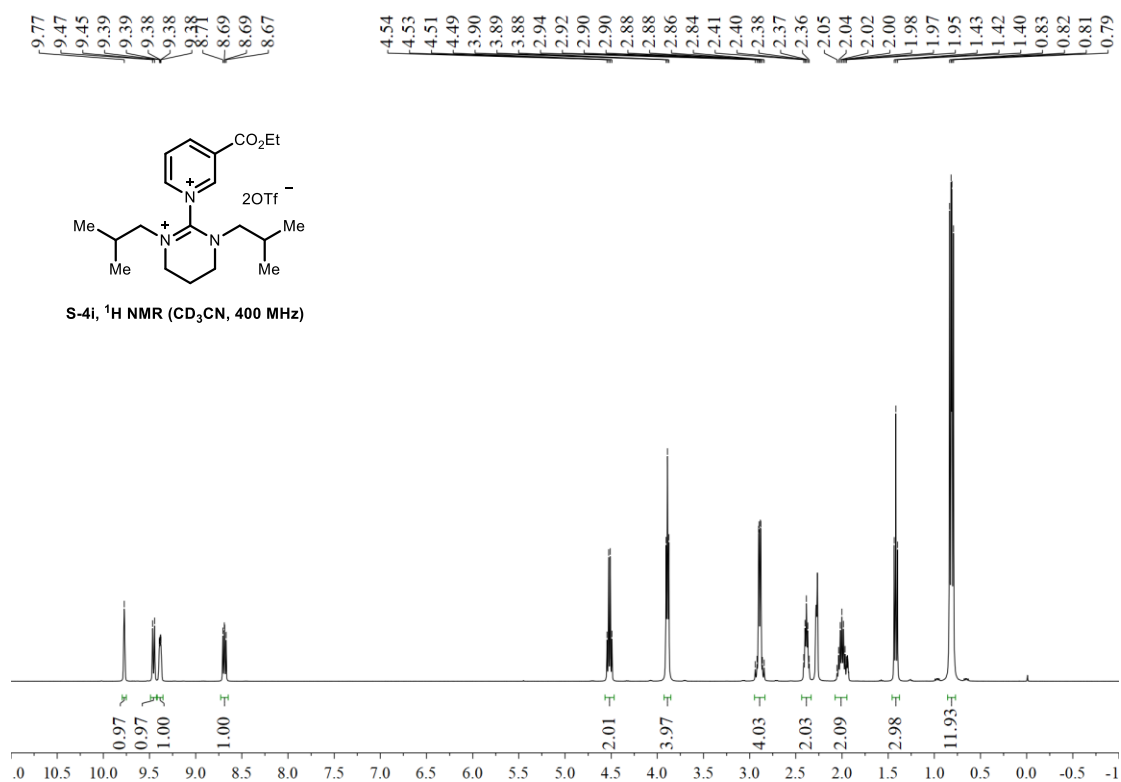

**Figure S45.** <sup>1</sup>H NMR of S-4i (CD<sub>3</sub>CN, 400 MHz)

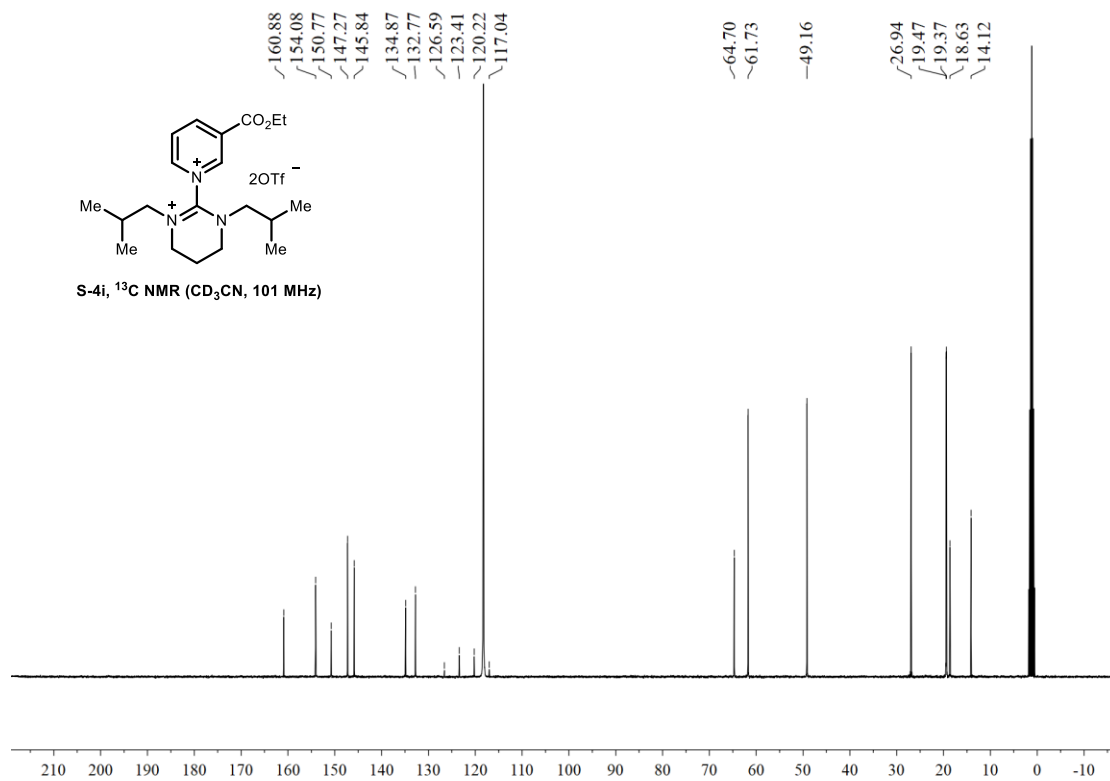

**Figure S46.** <sup>13</sup>C NMR of S-4i (CD<sub>3</sub>CN, 101 MHz)

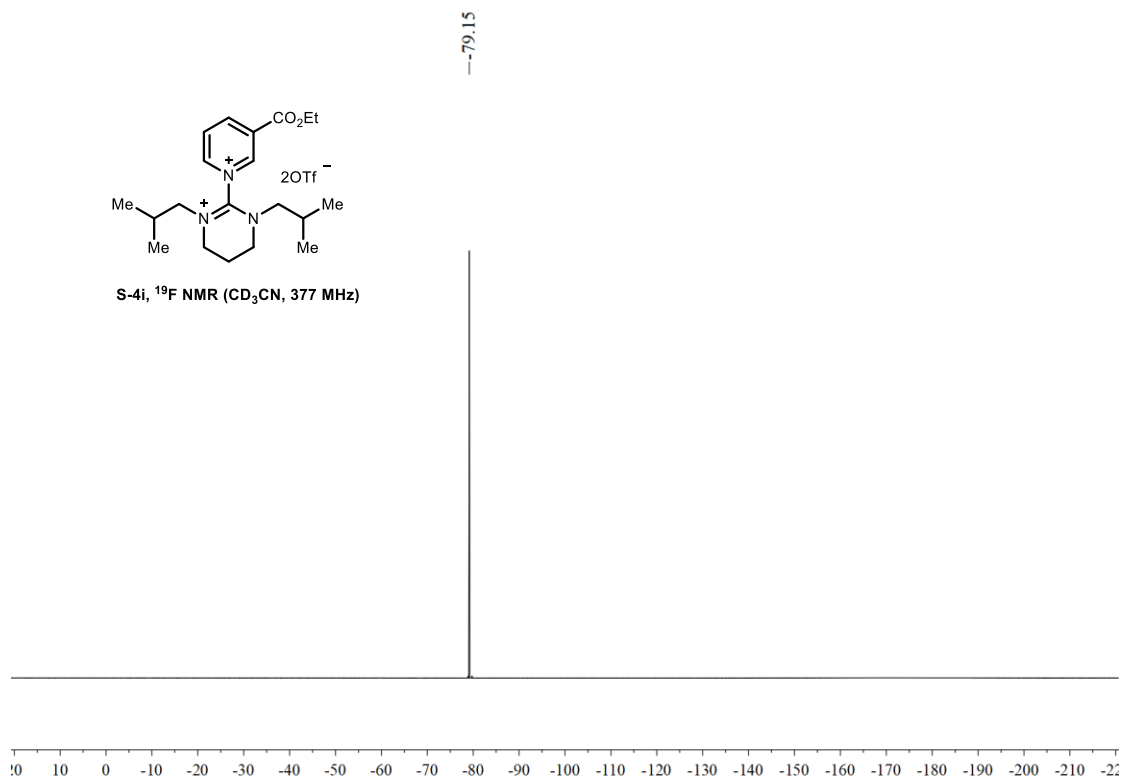

**Figure S47.**  $^{19}\text{F}$  NMR of S-4i ( $\text{CD}_3\text{CN}$ , 377 MHz)

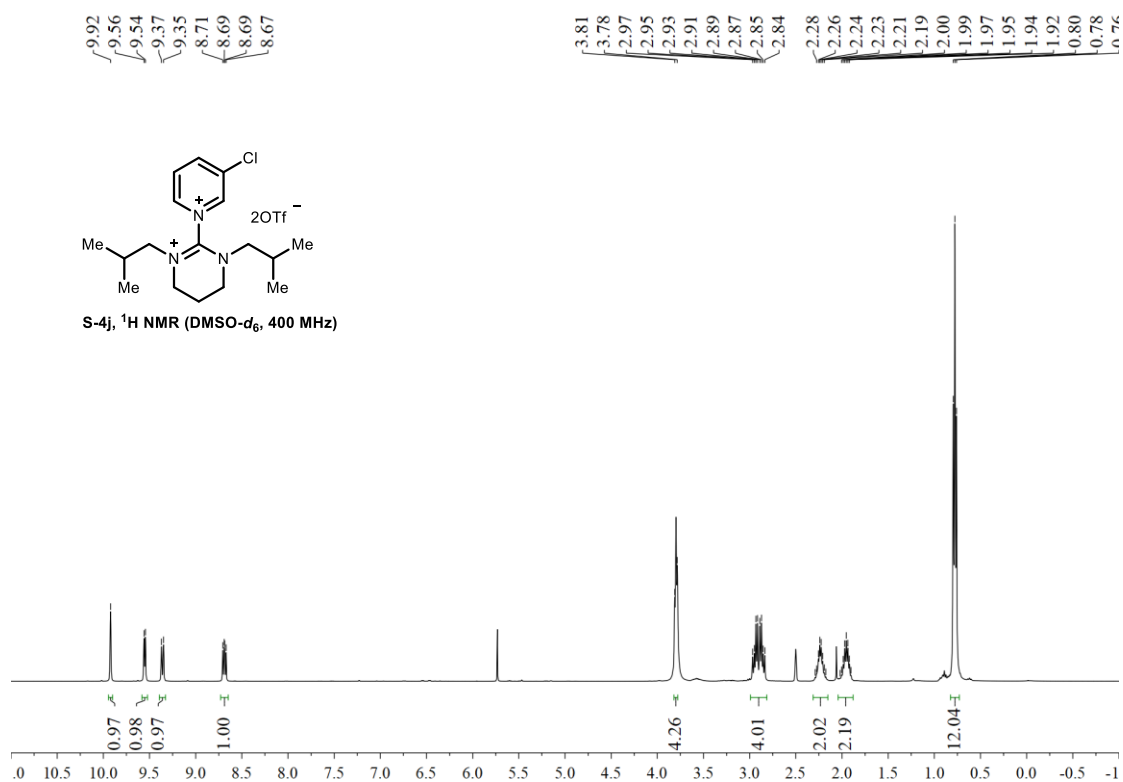

**Figure S48.  $^1\text{H}$  NMR of S-4j (DMSO- $d_6$ , 400 MHz)**

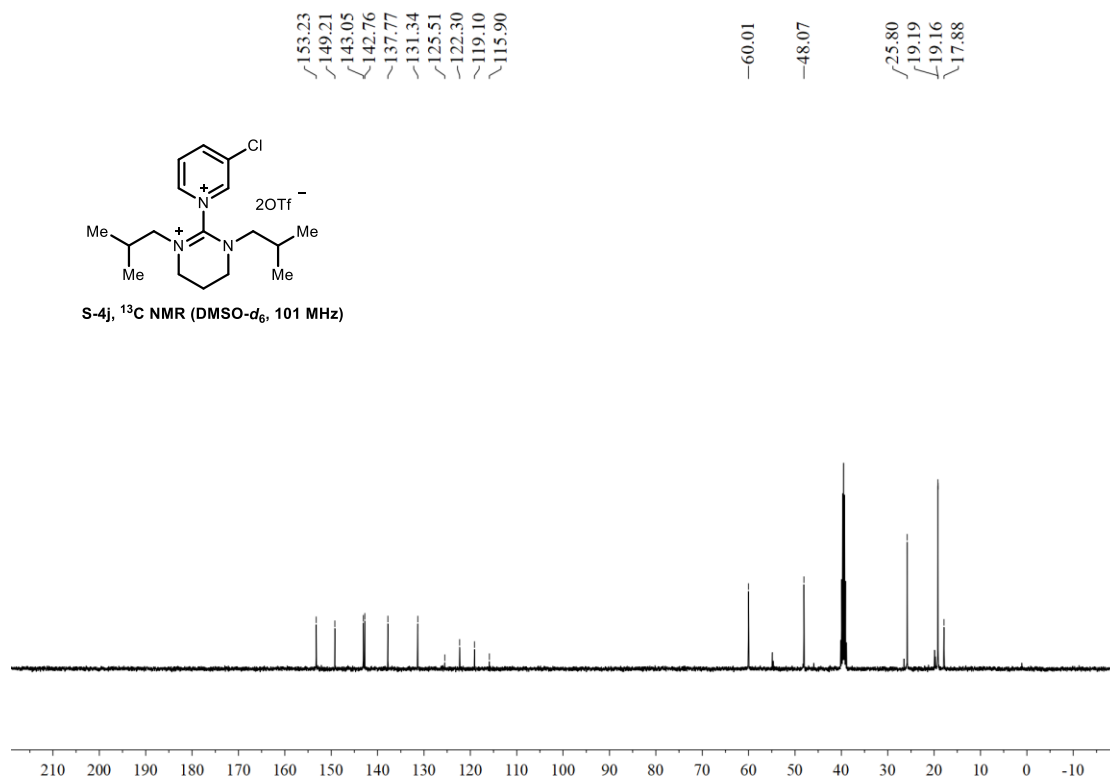

**Figure S49.  $^{13}\text{C}$  NMR of S-4j (DMSO- $d_6$ , 101 MHz)**

--78.87

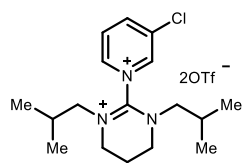

S-4j,  $^{19}\text{F}$  NMR (DMSO- $d_6$ , 377 MHz)

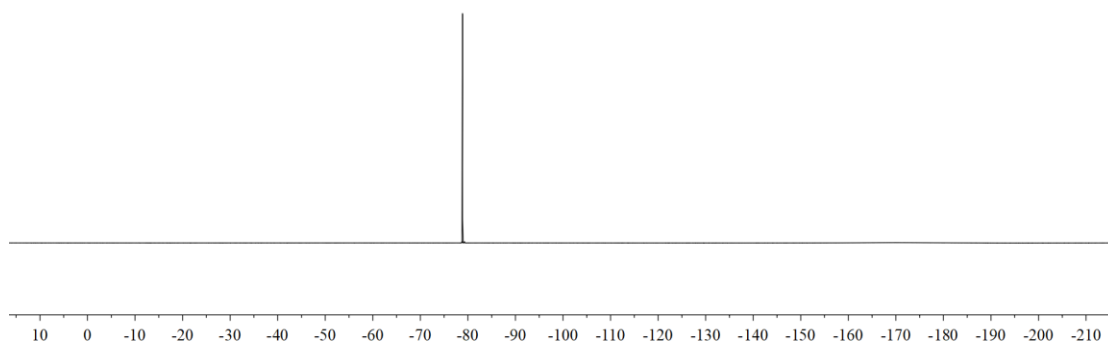

Figure S50.  $^{19}\text{F}$  NMR of S-4j (DMSO- $d_6$ , 377 MHz)

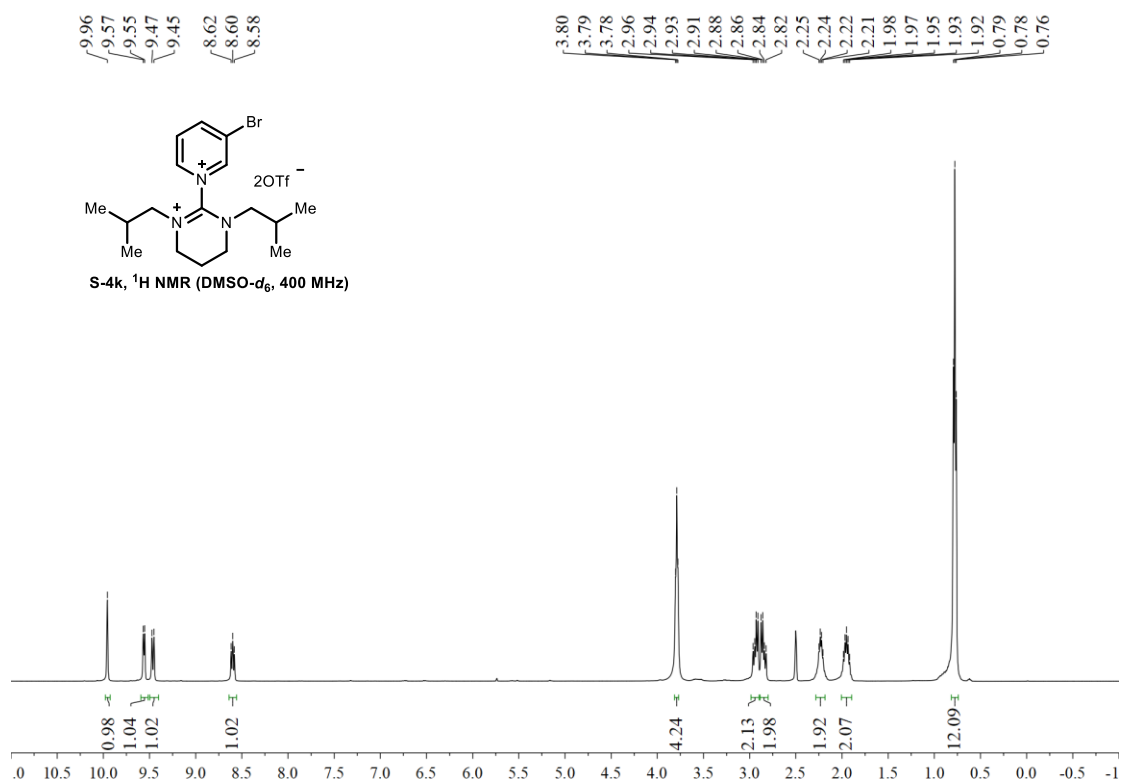

**Figure S51.** <sup>1</sup>H NMR of S-4k (DMSO-*d*<sub>6</sub>, 400 MHz)

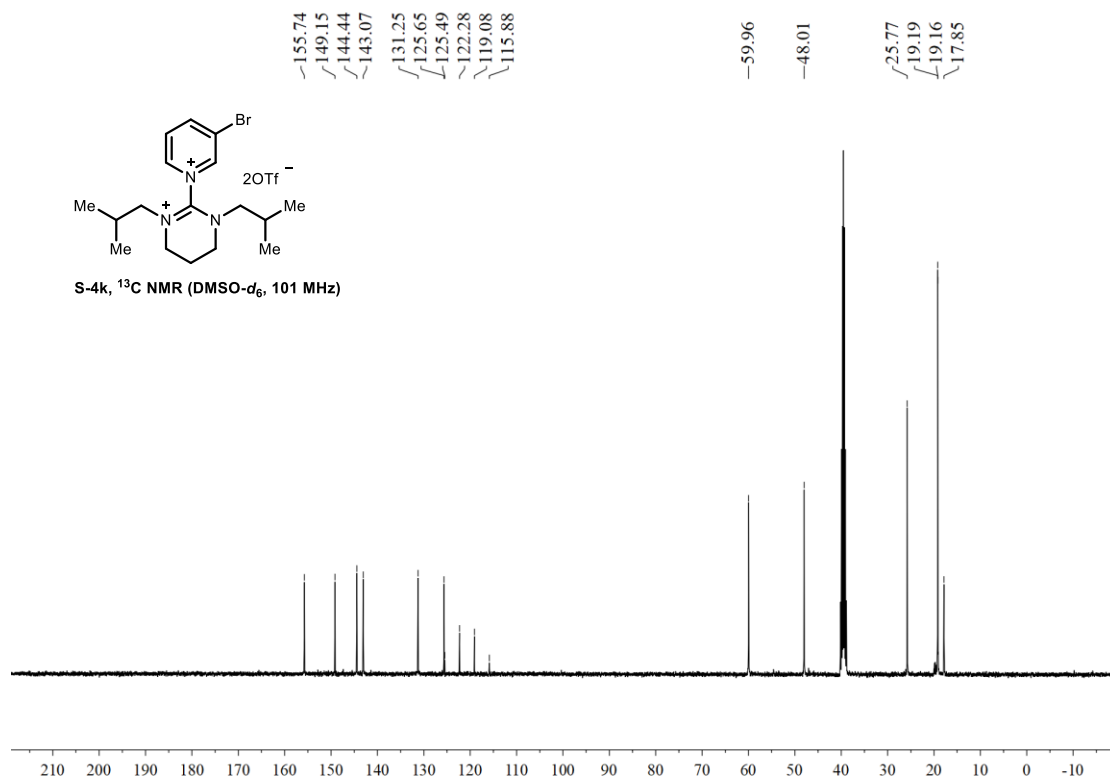

**Figure S52.** <sup>13</sup>C NMR of S-4k (DMSO-*d*<sub>6</sub>, 101 MHz)

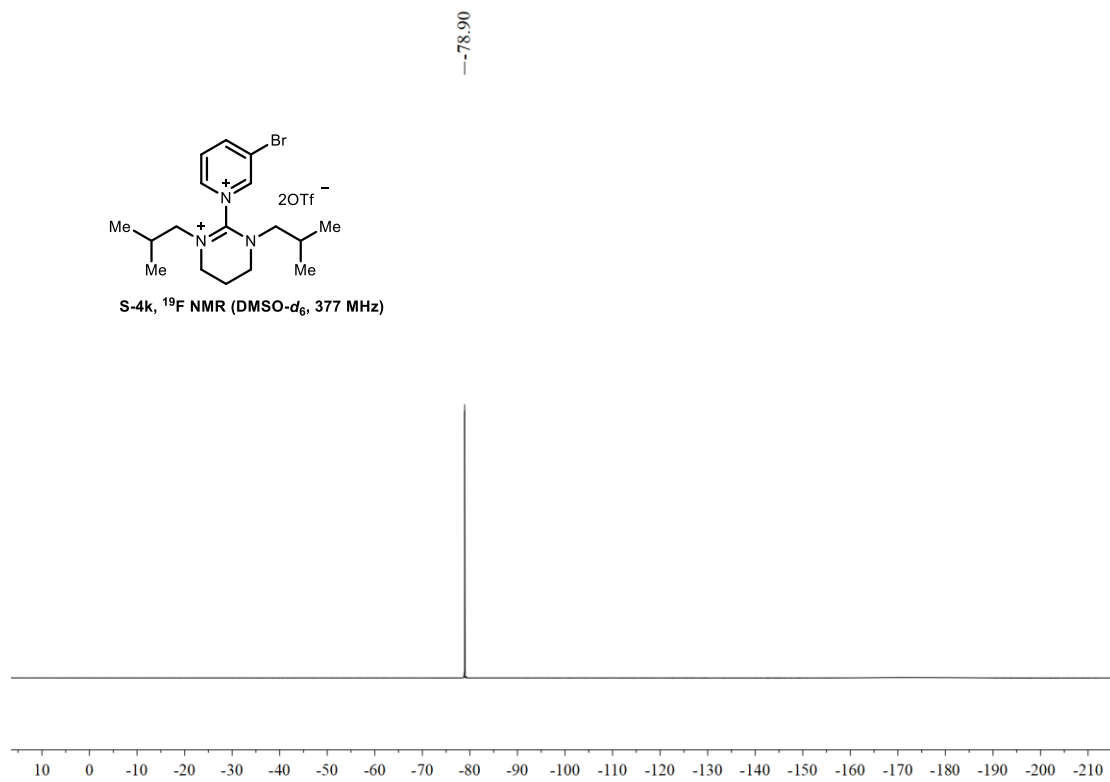

**Figure S53.**  $^{19}\text{F}$  NMR of S-4k (DMSO- $d_6$ , 377 MHz)

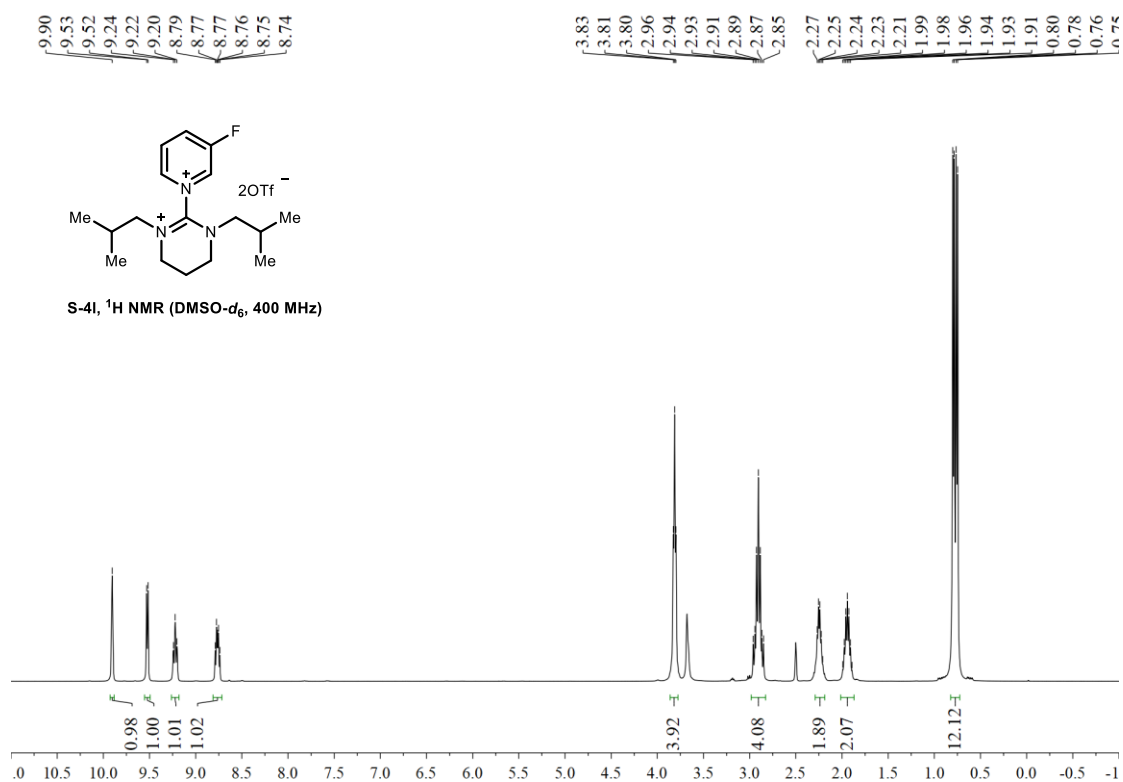

**Figure S54.  $^1\text{H}$  NMR of S-4I (DMSO- $d_6$ , 400 MHz)**

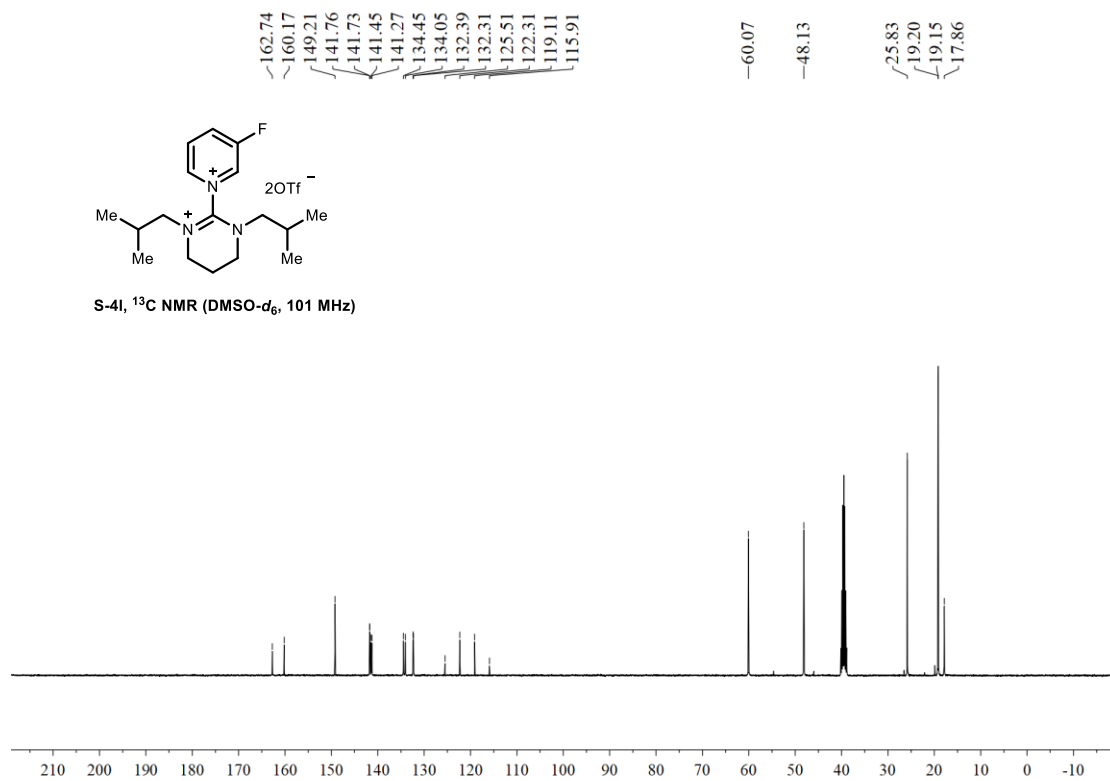

**Figure S55.  $^{13}\text{C}$  NMR of S-4I (DMSO- $d_6$ , 101 MHz)**



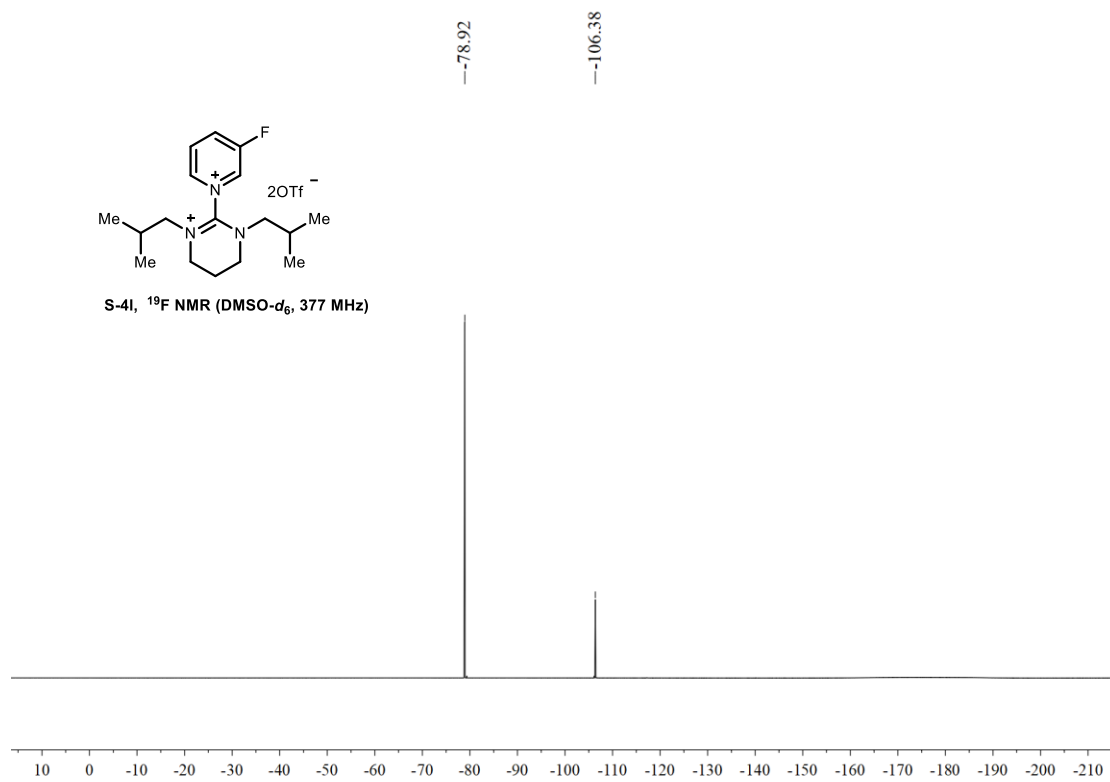

**Figure S56.**  $^{19}\text{F}$  NMR of S-4I (DMSO- $d_6$ , 377 MHz)

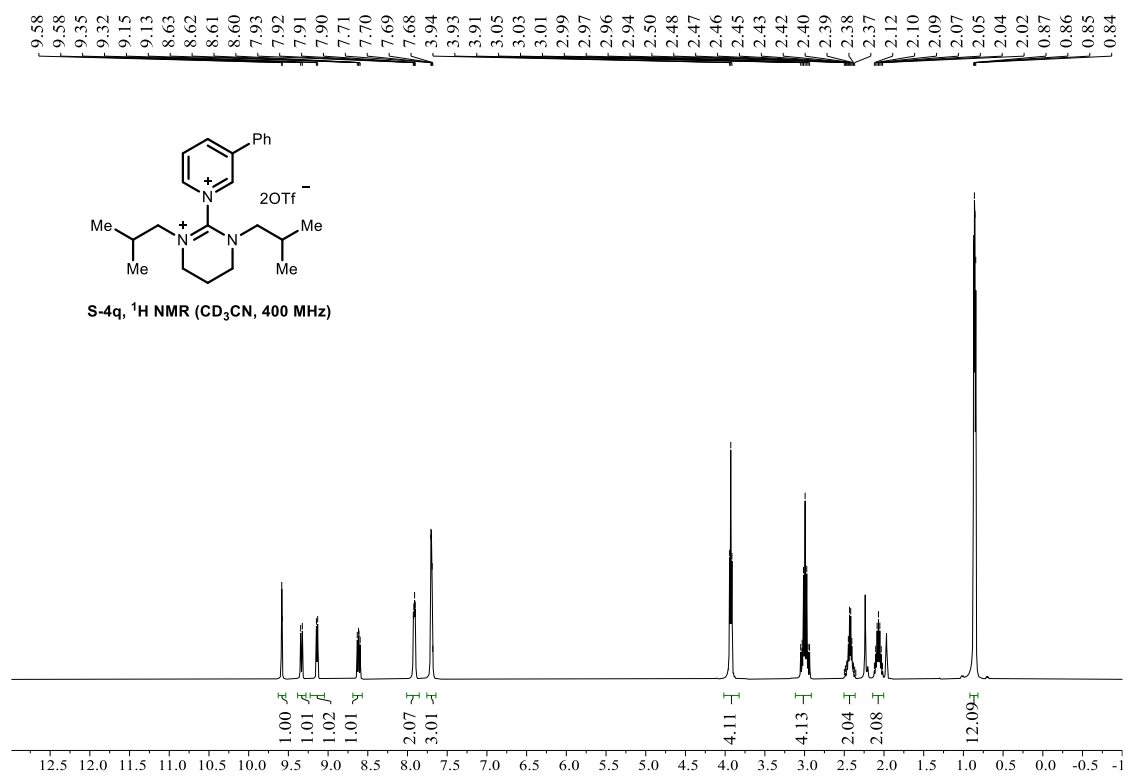

Figure S57.  $^1\text{H}$  NMR of S-4q ( $\text{CD}_3\text{CN}$ , 400 MHz)

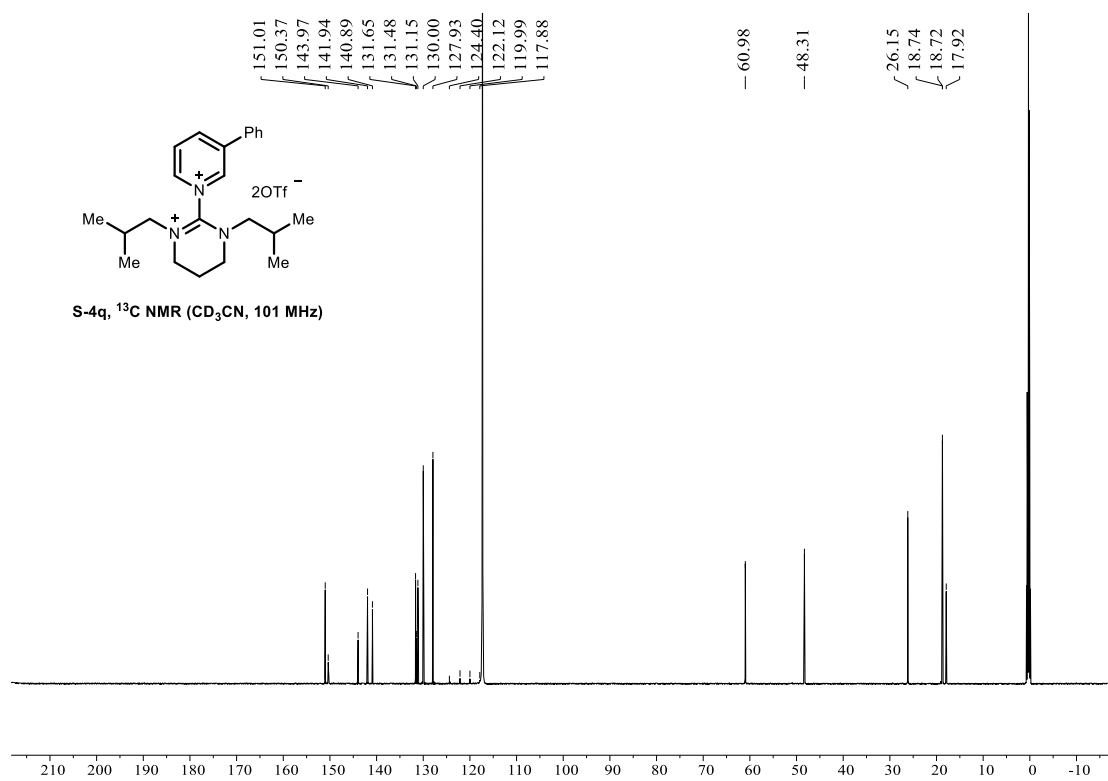

Figure S58.  $^{13}\text{C}$  NMR of S-4q ( $\text{CD}_3\text{CN}$ , 101 MHz)

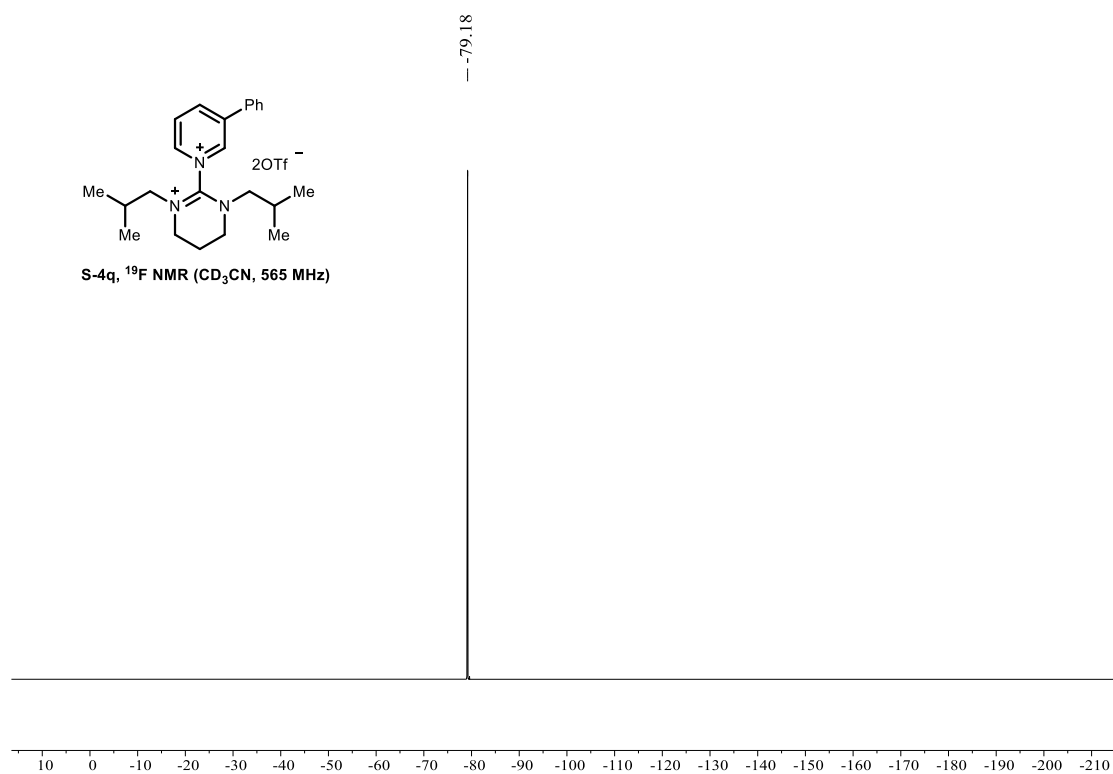

**Figure S59.**  $^{19}\text{F}$  NMR of S-4q ( $\text{CD}_3\text{CN}$ , 565 MHz)

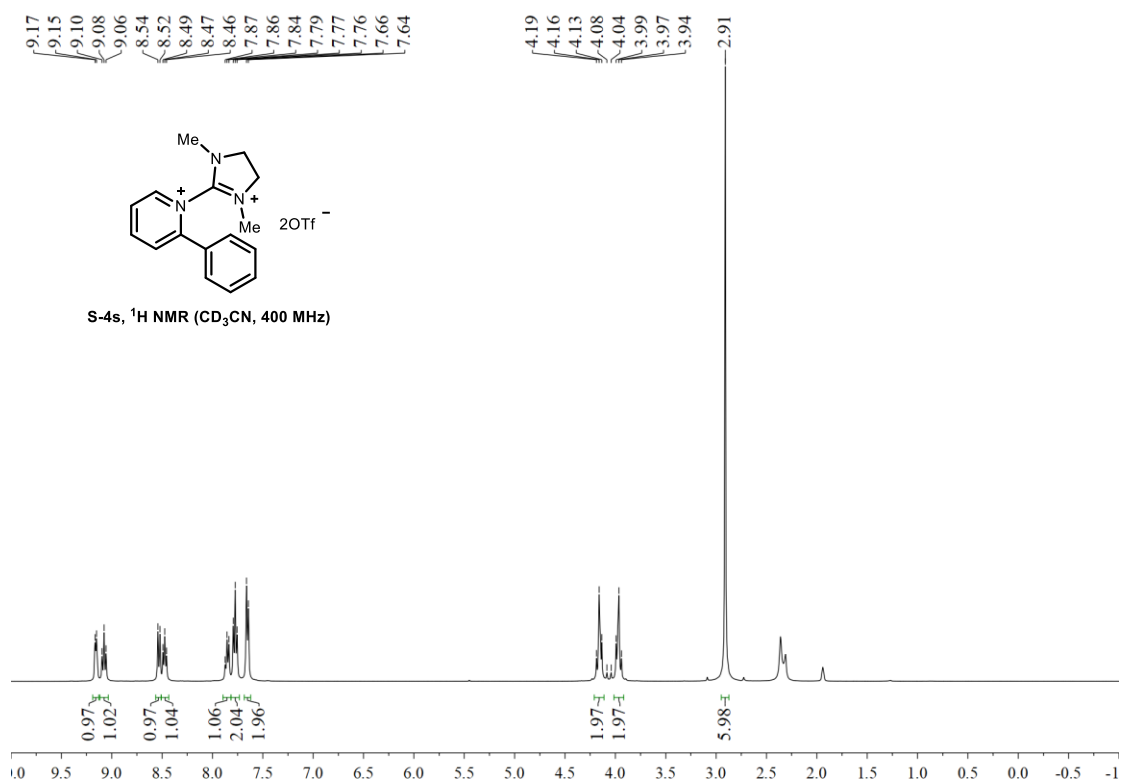

Figure S60. <sup>1</sup>H NMR of S-4s (CD<sub>3</sub>CN, 400 MHz)

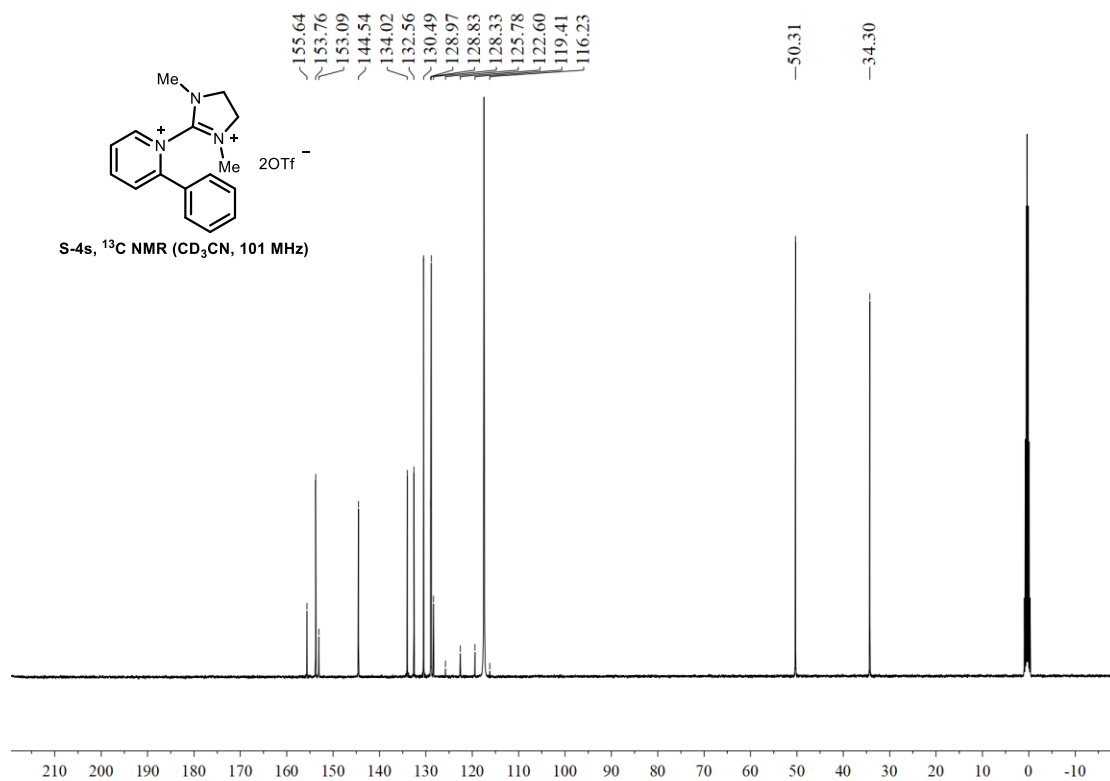

Figure S61. <sup>13</sup>C NMR of S-4s (CD<sub>3</sub>CN, 101 MHz)

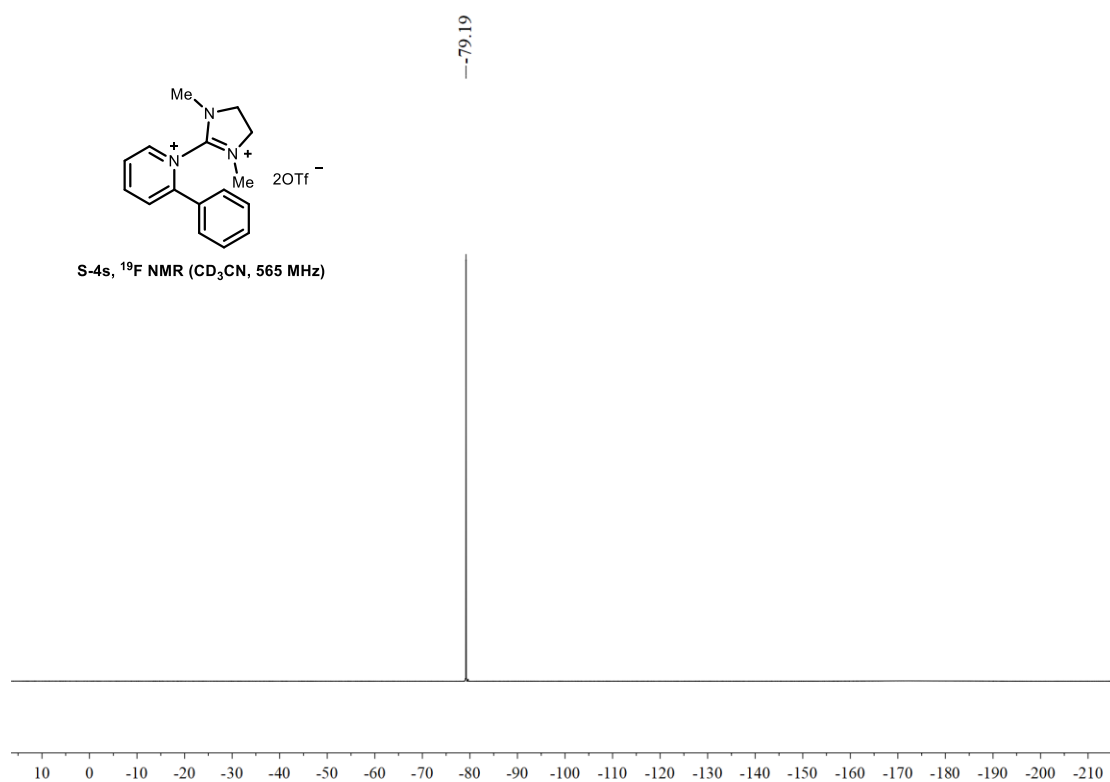

**Figure S62.**  $^{19}\text{F}$  NMR of **S-4s** ( $\text{CD}_3\text{CN}$ , 565 MHz)

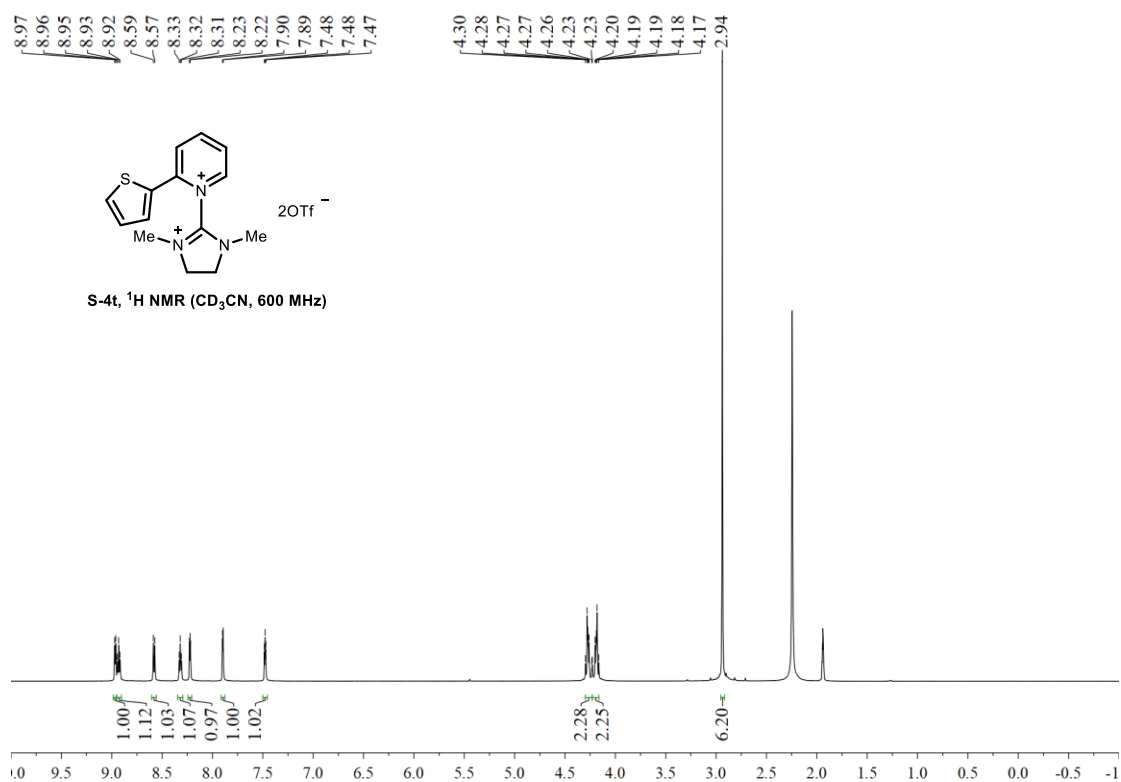

**Figure S63.** <sup>1</sup>H NMR of S-4t (CD<sub>3</sub>CN, 600 MHz)

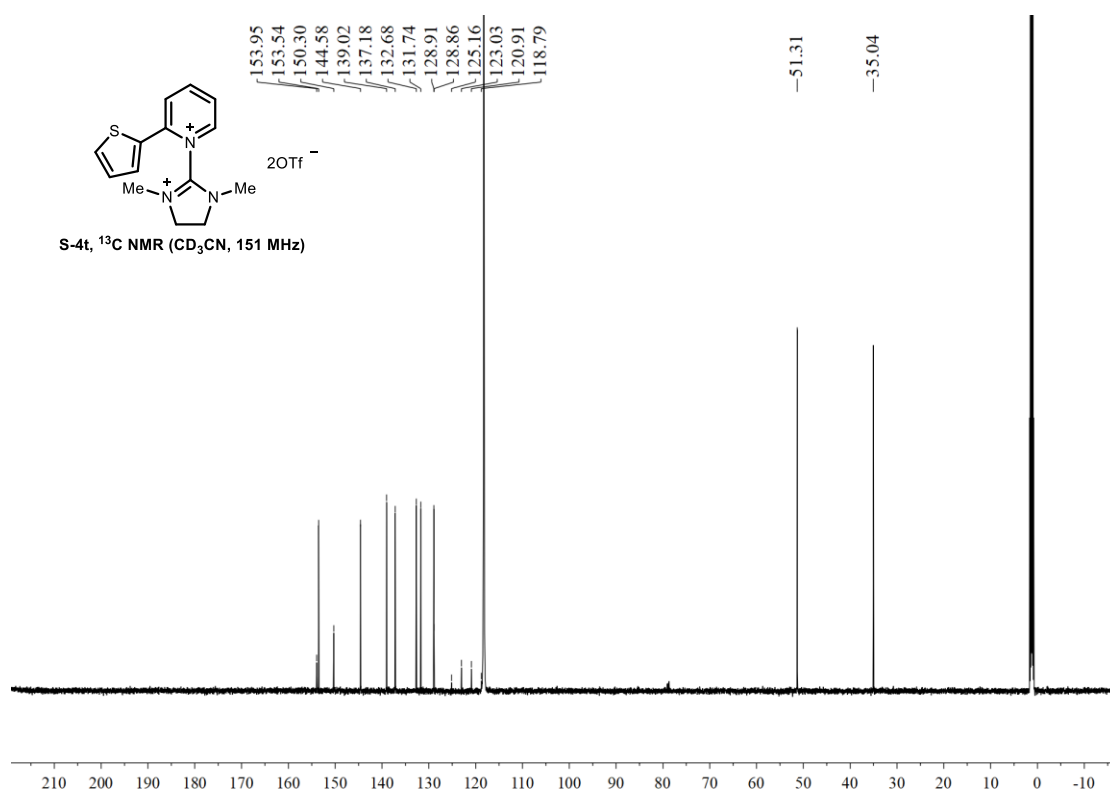

**Figure S64.** <sup>13</sup>C NMR of S-4t (CD<sub>3</sub>CN, 151 MHz)

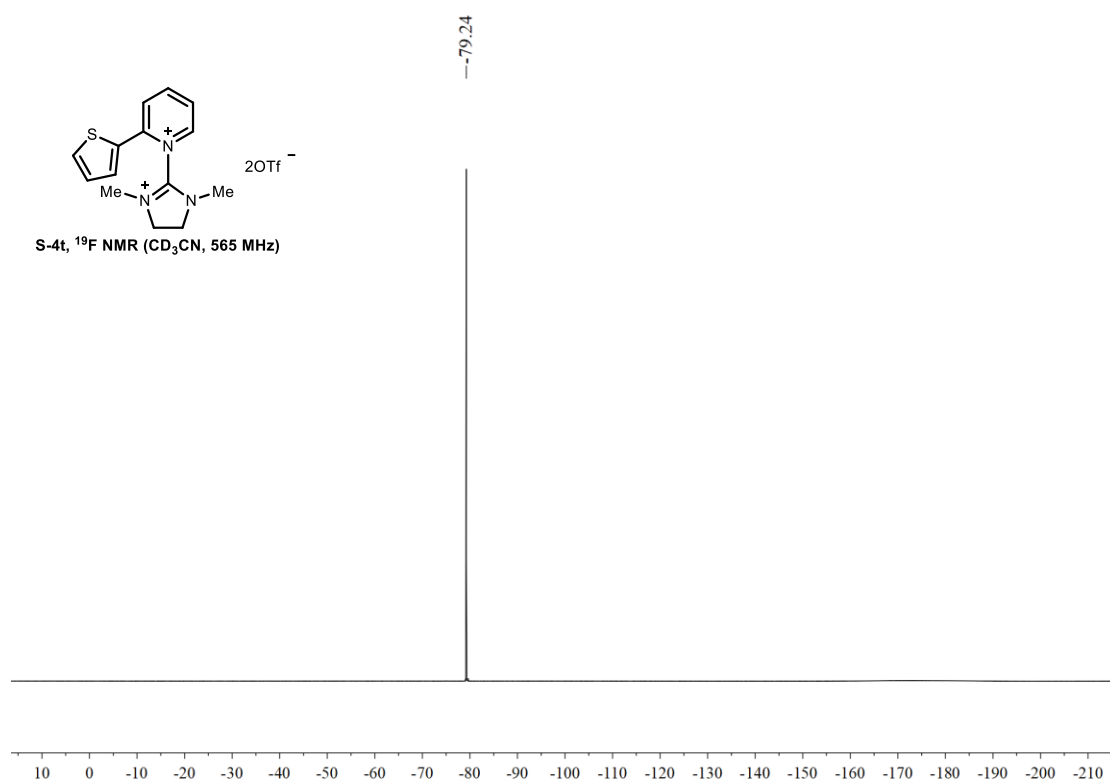

**Figure S65.** <sup>19</sup>F NMR of S-4t (CD<sub>3</sub>CN, 565 MHz)

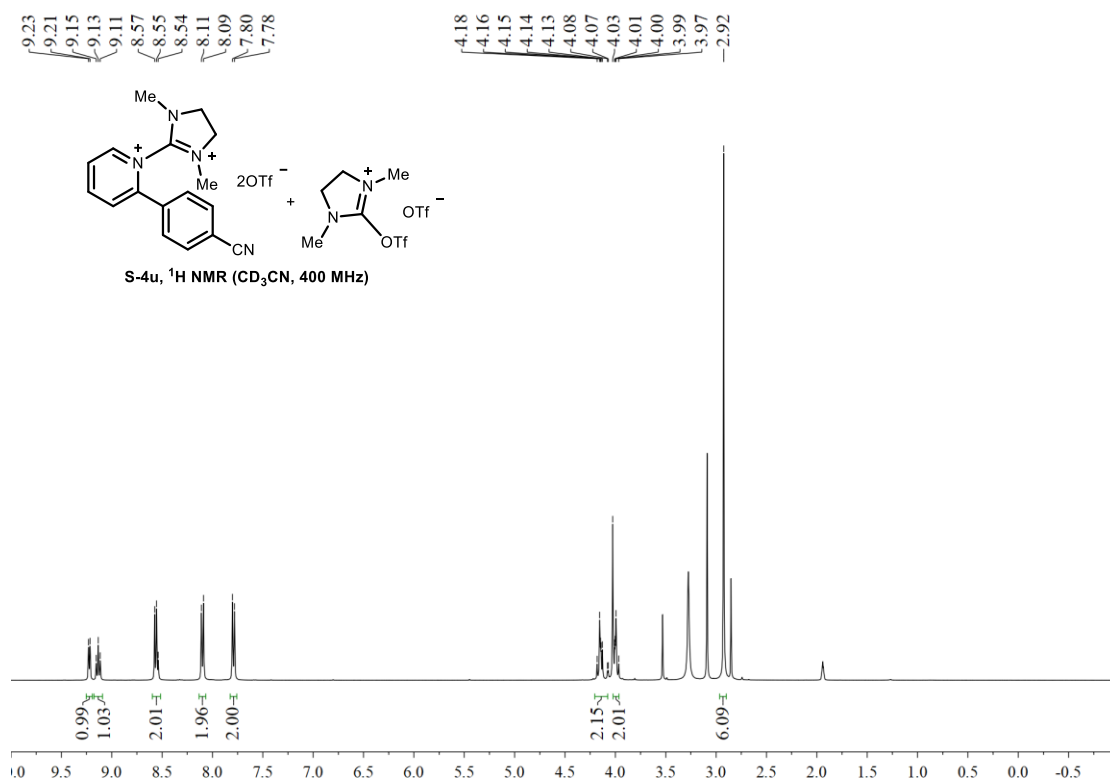

Figure S66.  $^1\text{H}$  NMR of S-4u ( $\text{CD}_3\text{CN}$ , 400 MHz)

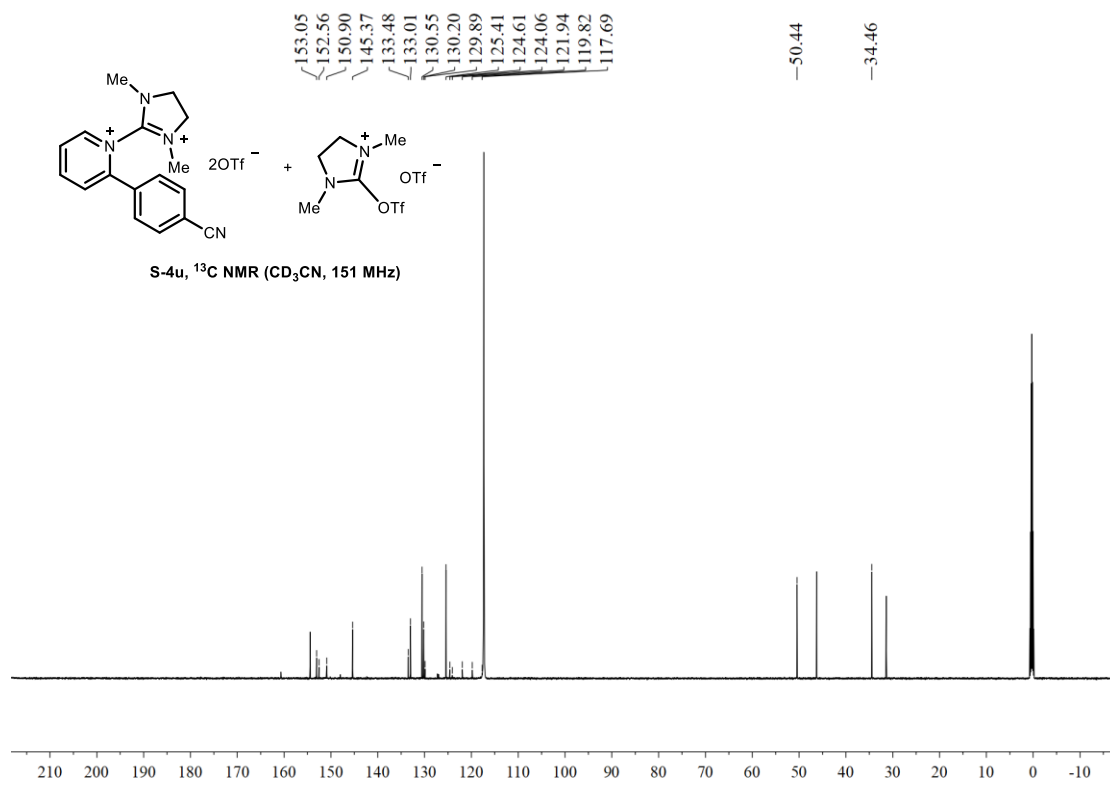

Figure S67.  $^{13}\text{C}$  NMR of S-4u ( $\text{CD}_3\text{CN}$ , 151 MHz)



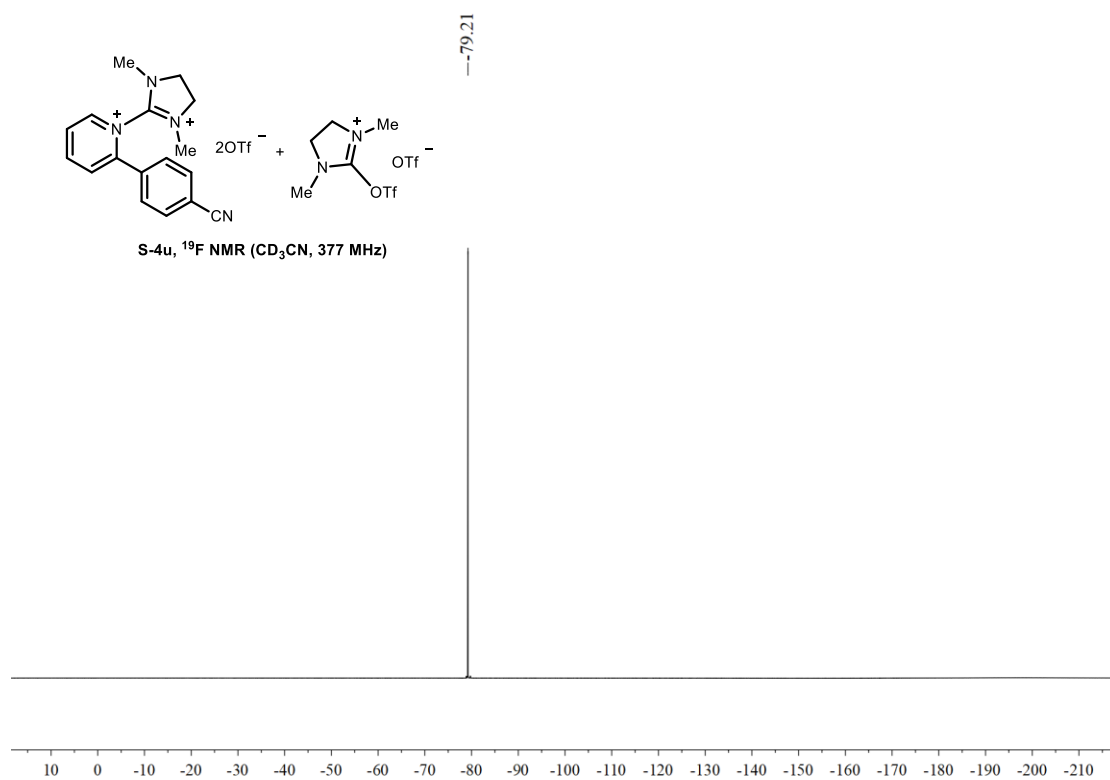

**Figure S68.**  $^{19}\text{F}$  NMR of **S-4u** ( $\text{CD}_3\text{CN}$ , 377 MHz)

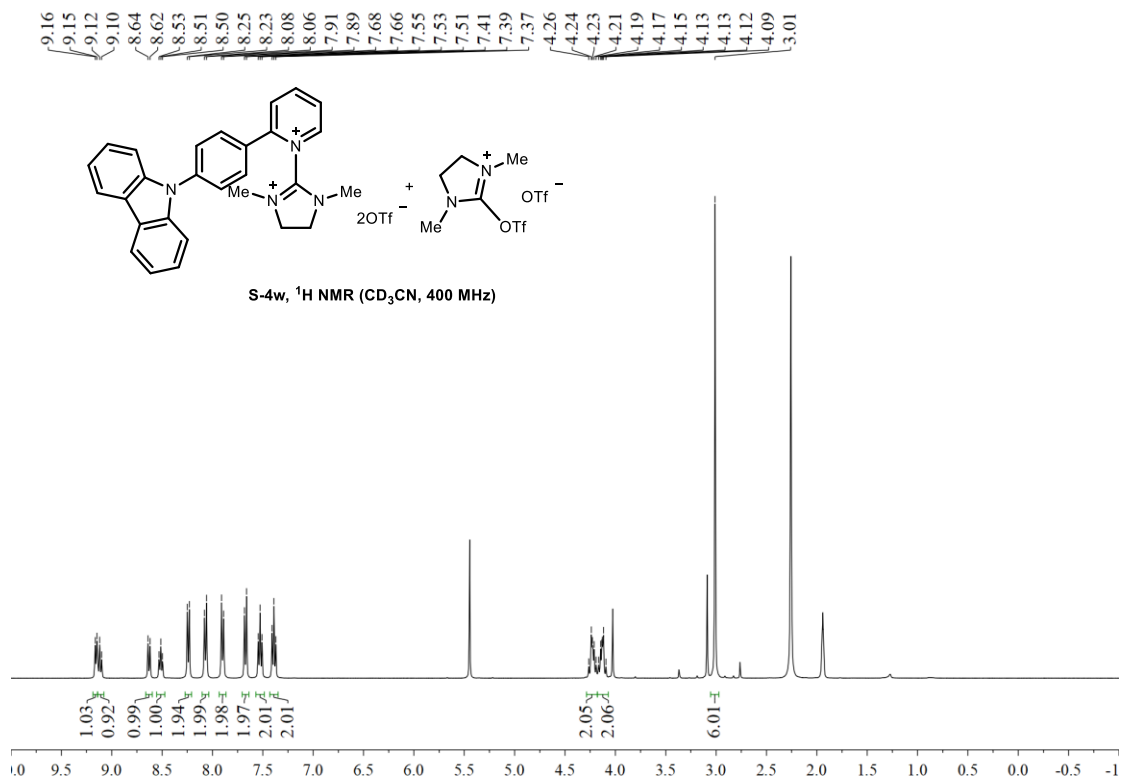

Figure S69.  $^1\text{H}$  NMR of S-4w ( $\text{CD}_3\text{CN}$ , 400 MHz)

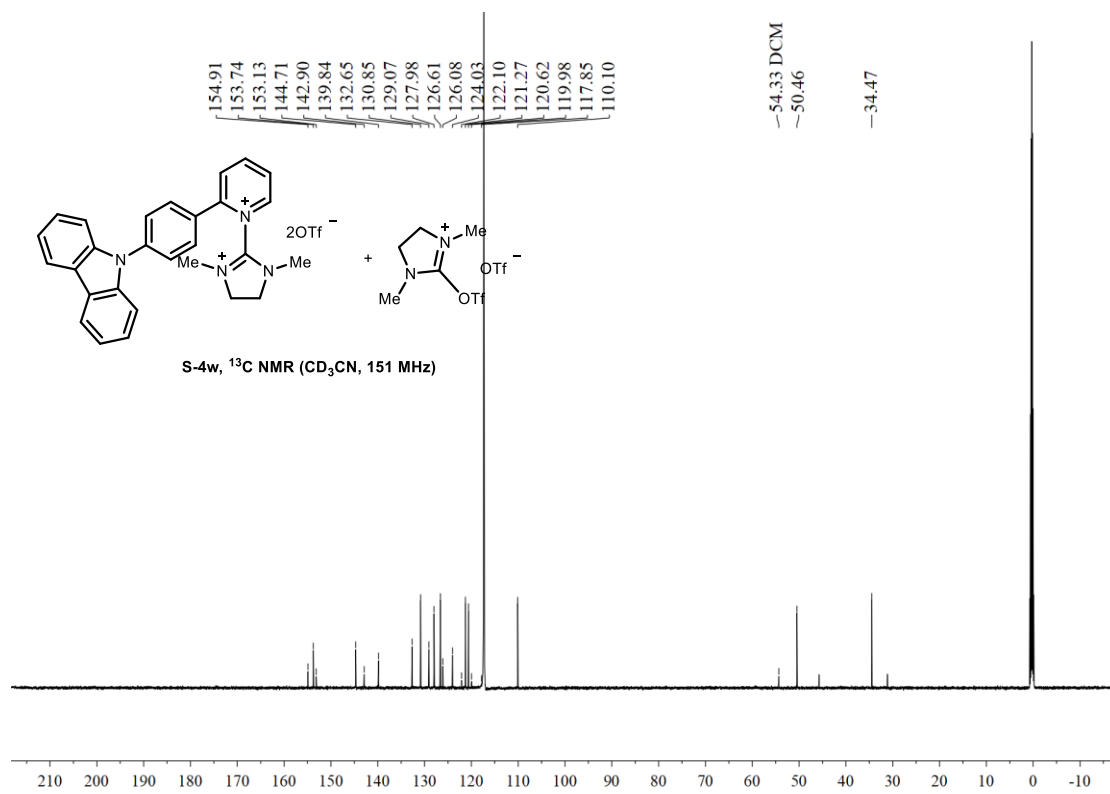

Figure S70.  $^{13}\text{C}$  NMR of S-4w ( $\text{CD}_3\text{CN}$ , 151 MHz)

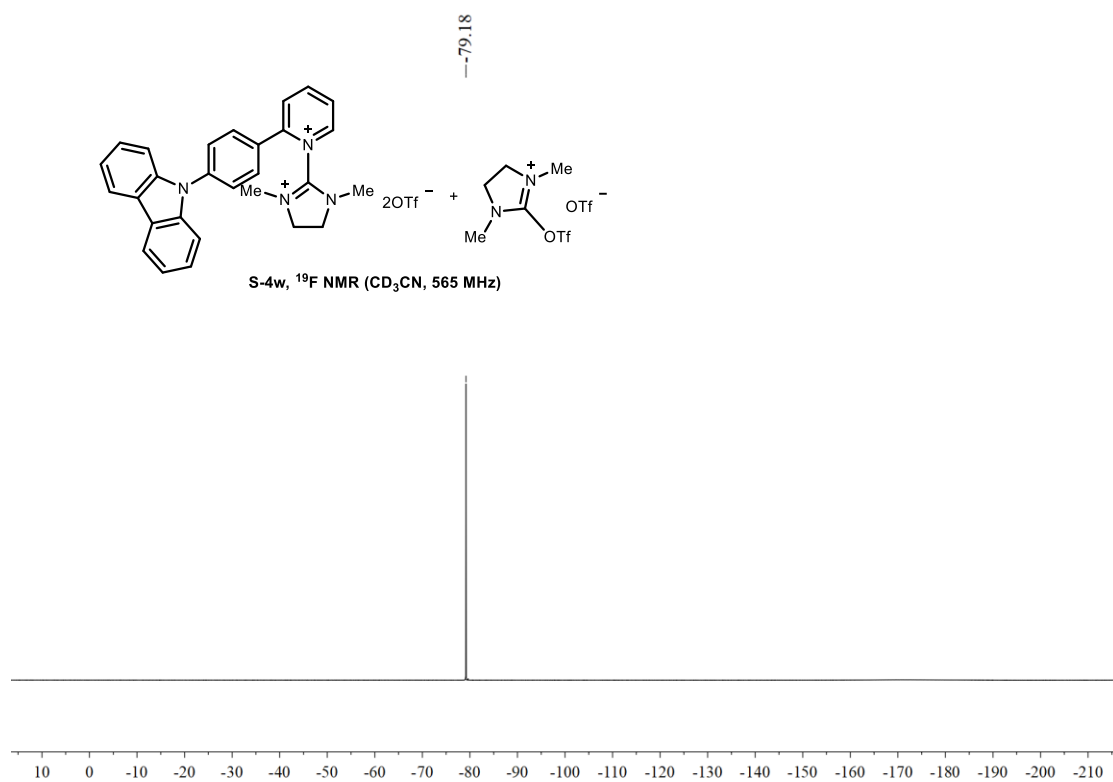

**Figure S71.**  $^{19}\text{F}$  NMR of S-4w ( $\text{CD}_3\text{CN}$ , 565 MHz)

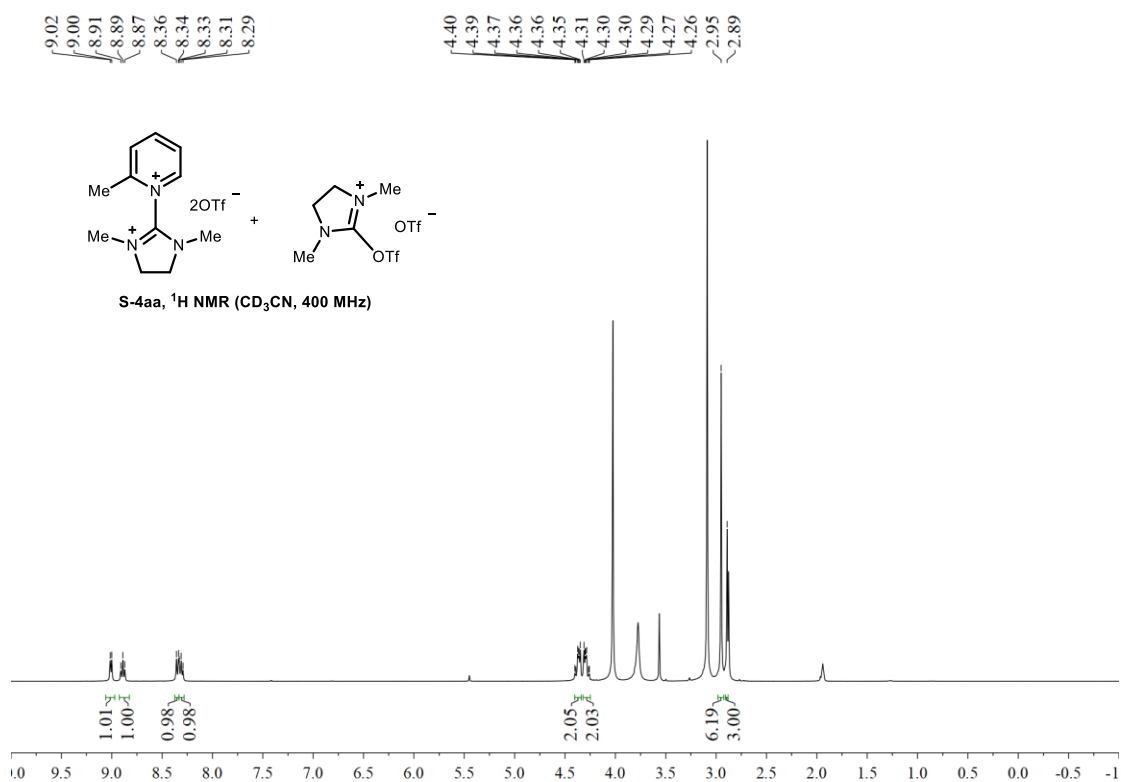

**Figure S72.** <sup>1</sup>H NMR of S-4aa (CD<sub>3</sub>CN, 400 MHz)

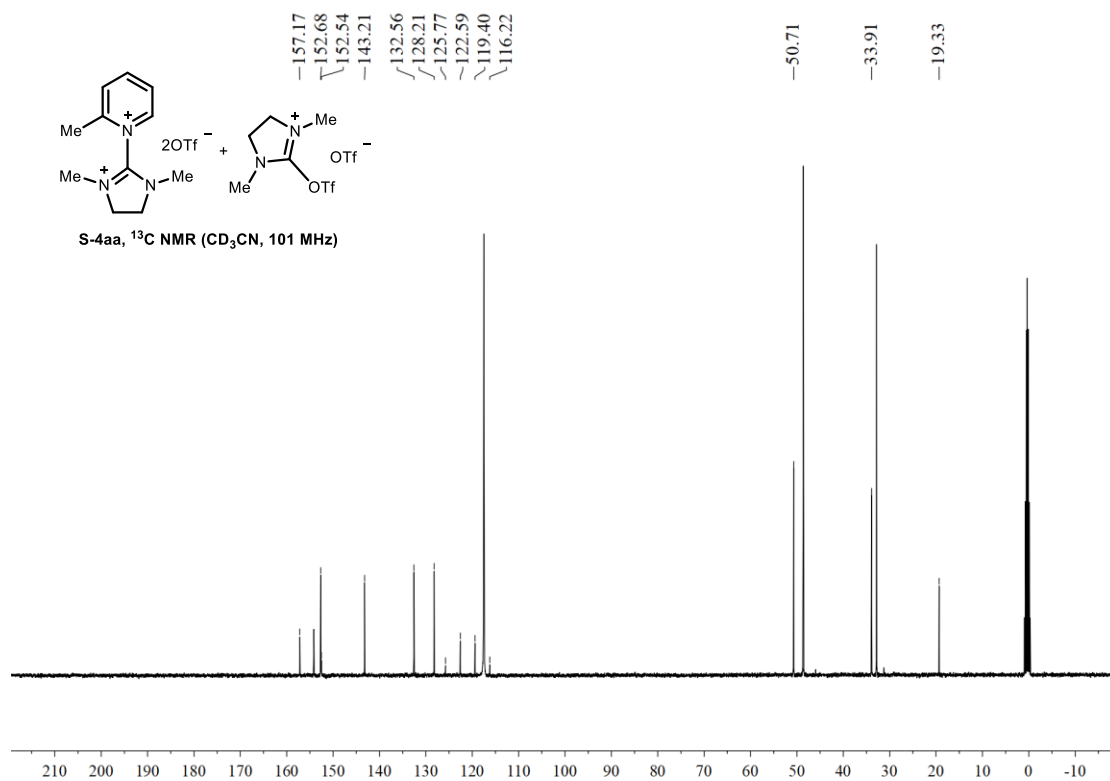

**Figure S73.** <sup>13</sup>C NMR of S-4aa (CD<sub>3</sub>CN, 101 MHz)

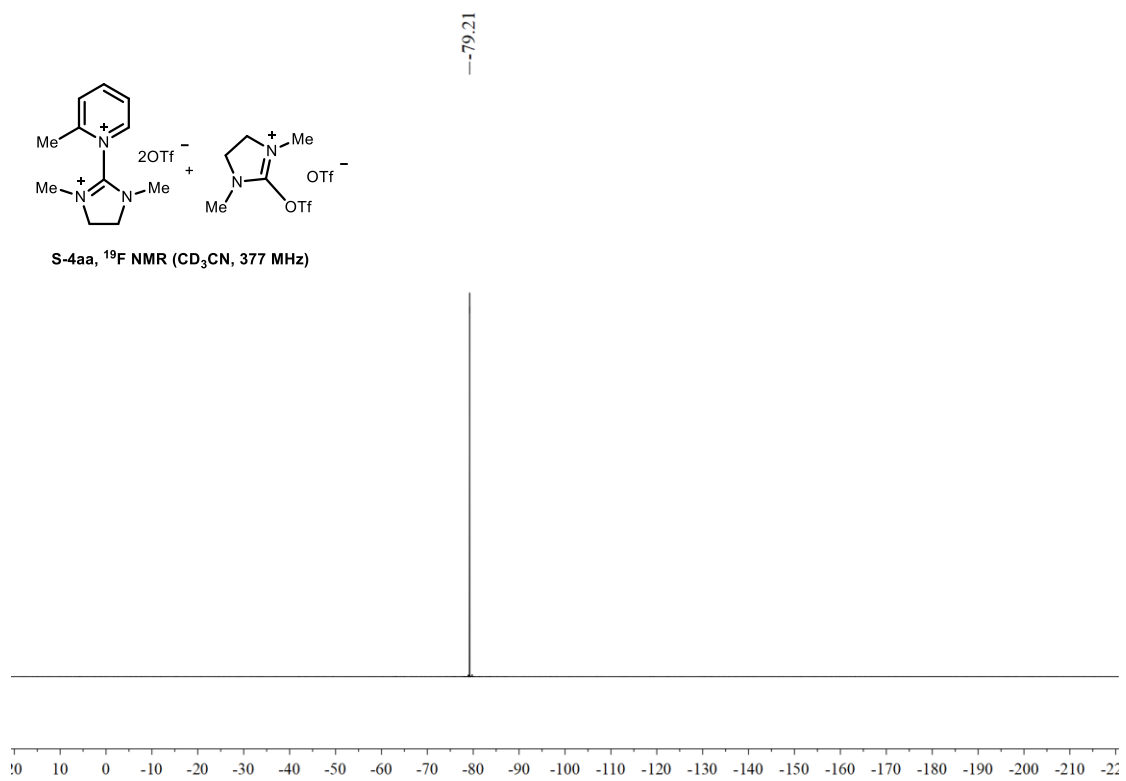

**Figure S74.**  $^{19}\text{F}$  NMR of **S-4aa** ( $\text{CD}_3\text{CN}$ , 377 MHz)

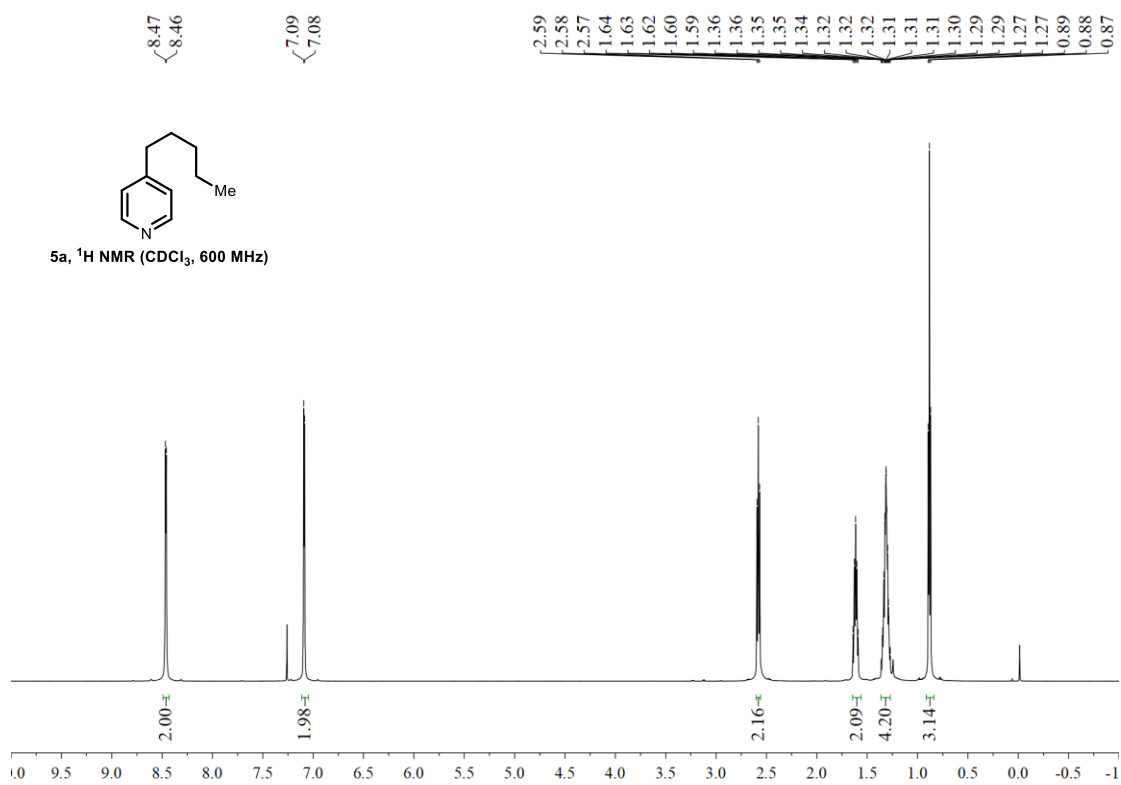

**Figure S75.  $^1\text{H}$  NMR of 5a ( $\text{CDCl}_3$ , 600 MHz)**

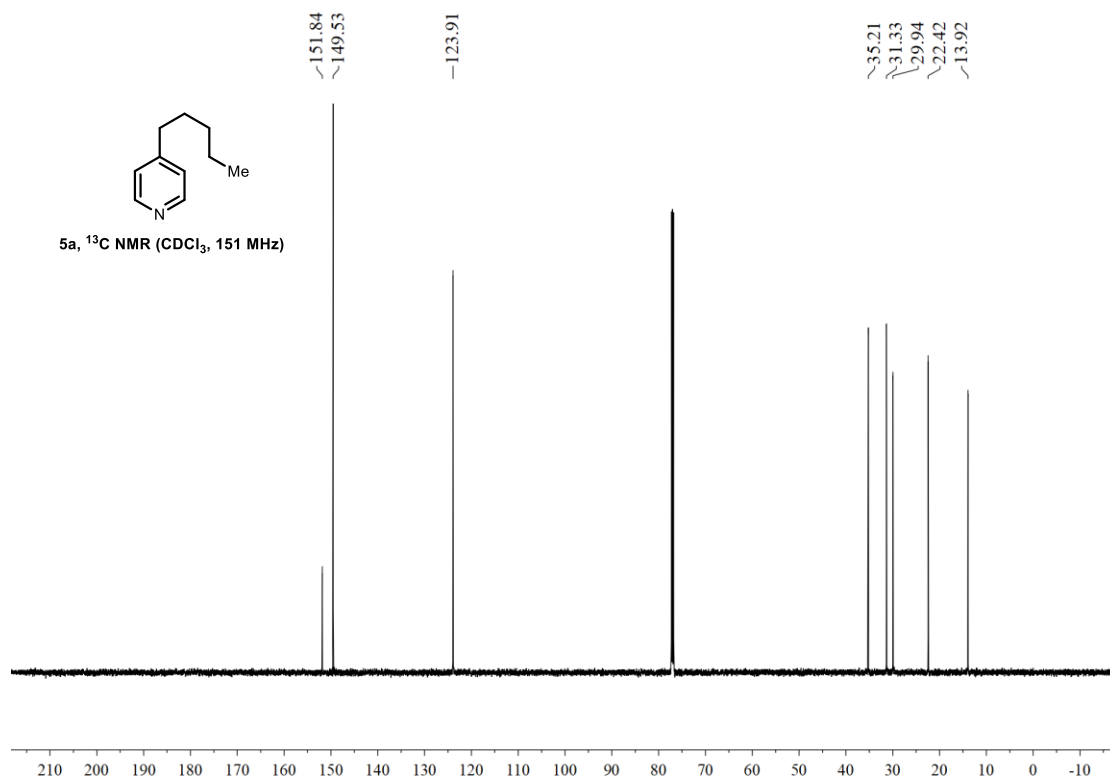

**Figure S76.  $^{13}\text{C}$  NMR of 5a ( $\text{CDCl}_3$ , 151 MHz)**

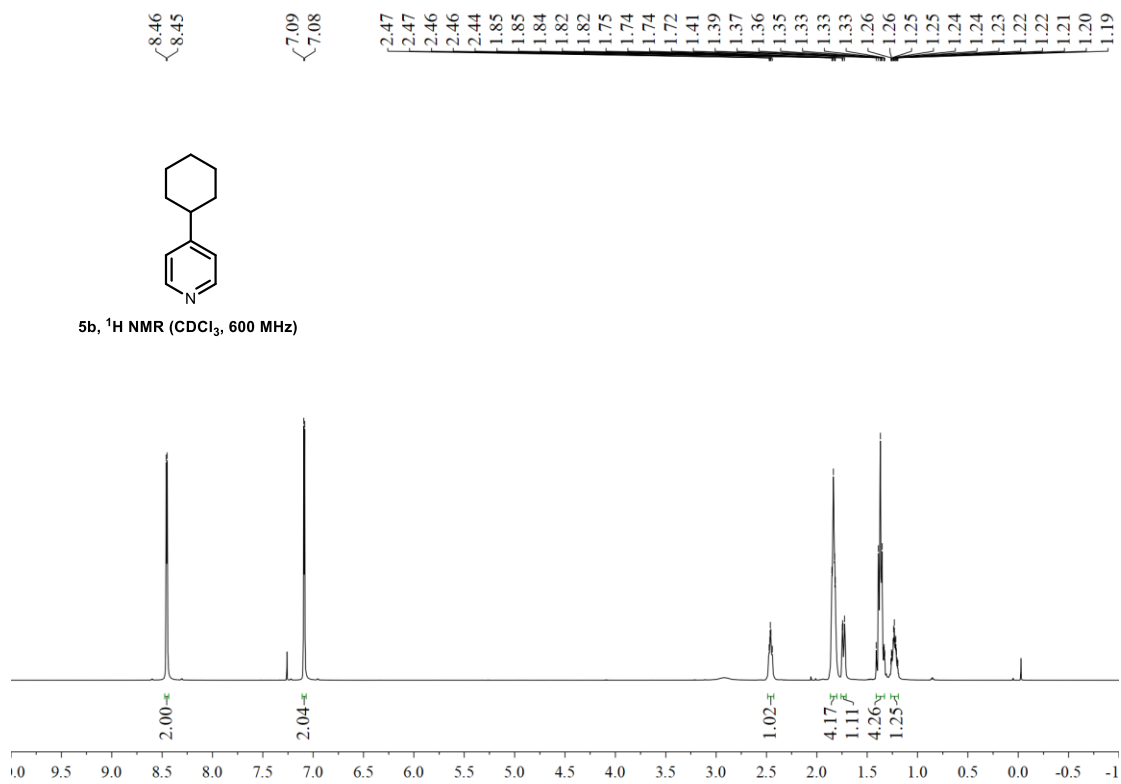

**Figure S77.**  $^1\text{H}$  NMR of **5b** ( $\text{CDCl}_3$ , 600 MHz)

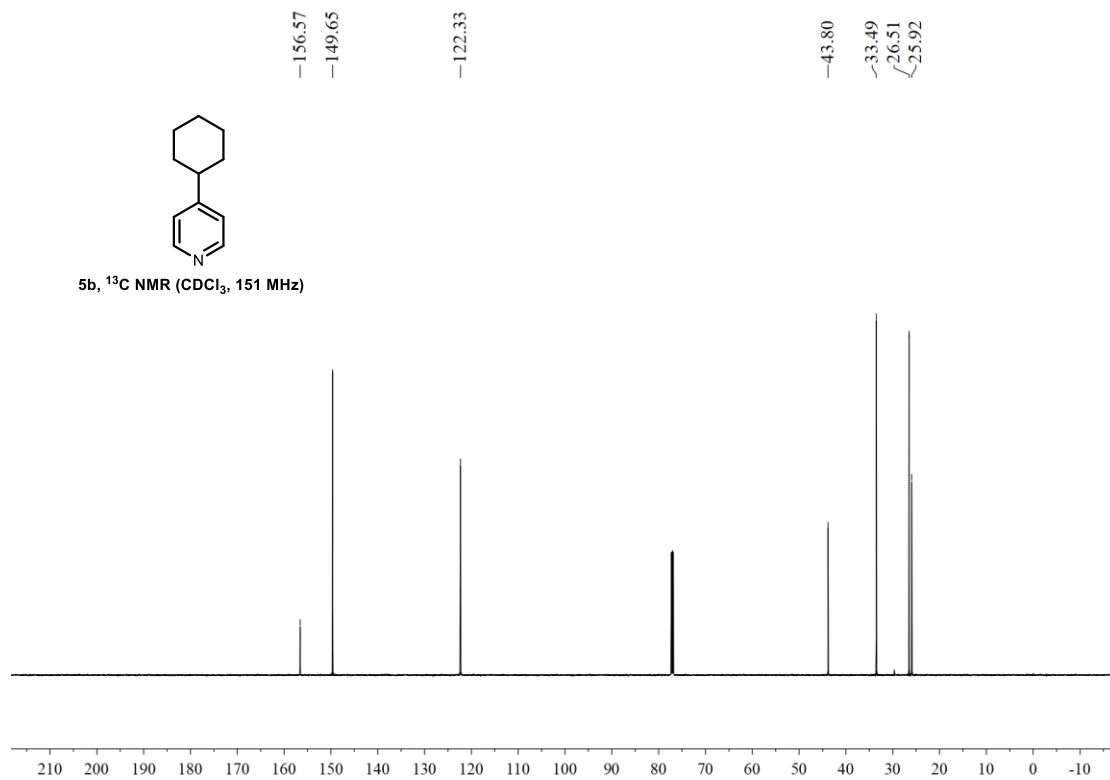

**Figure S78.**  $^{13}\text{C}$  NMR of **5b** ( $\text{CDCl}_3$ , 151 MHz)

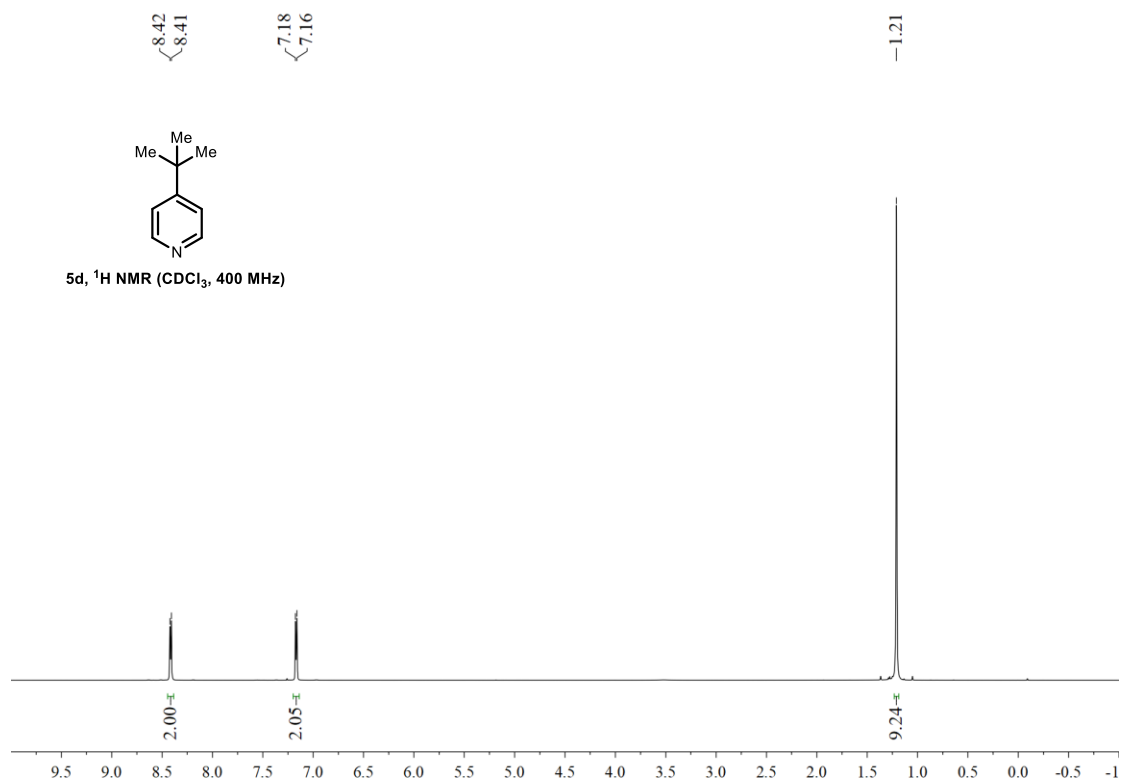

Figure S79.  $^1\text{H NMR}$  of **5d** ( $\text{CDCl}_3$ , 400 MHz)

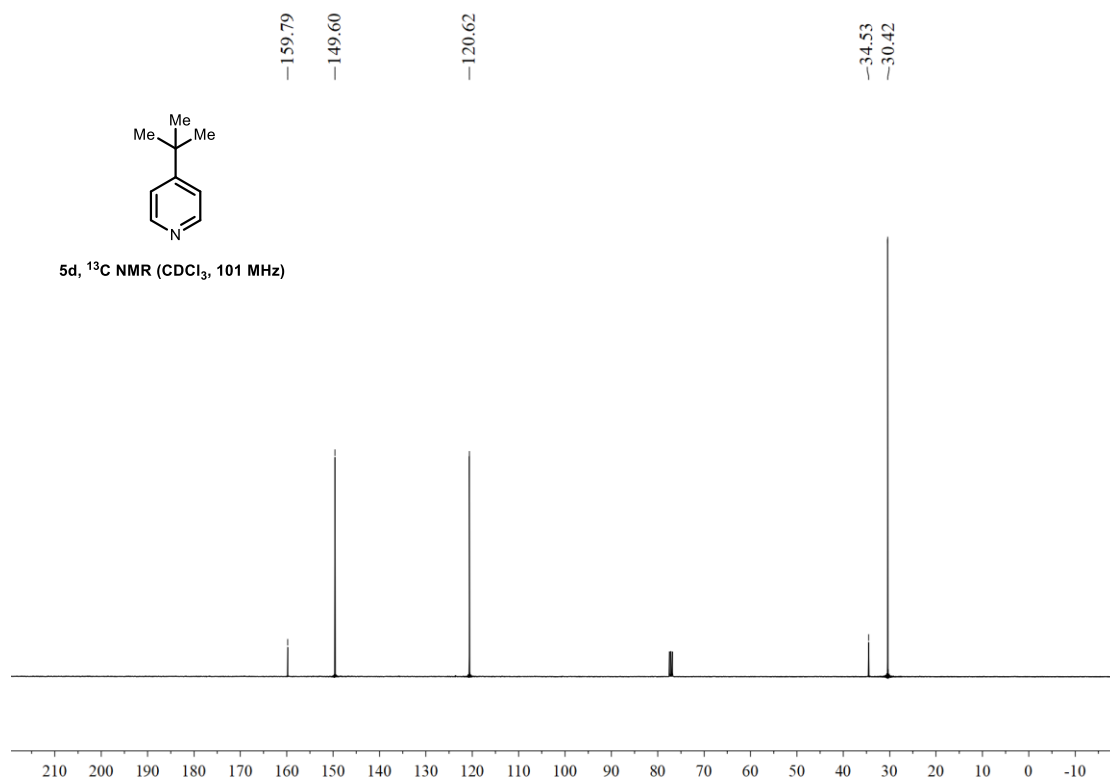

Figure S80.  $^{13}\text{C NMR}$  of **5d** ( $\text{CDCl}_3$ , 101 MHz)



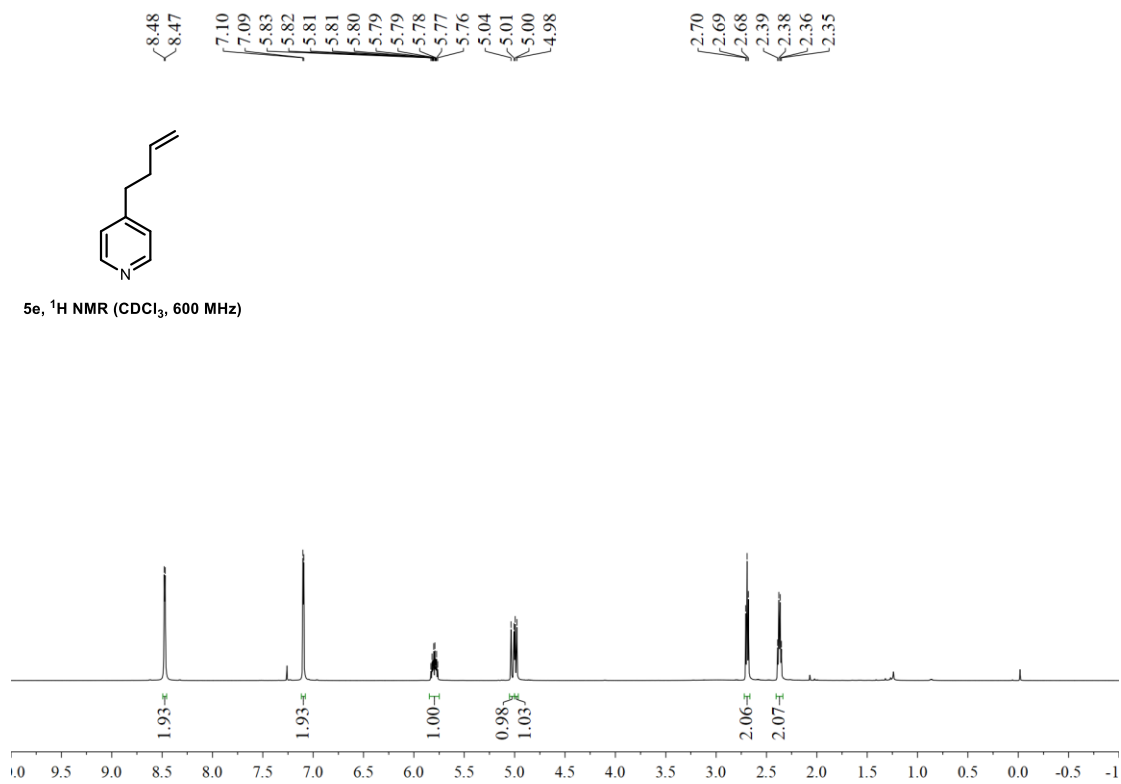

**Figure S81.**  $^1\text{H NMR}$  of **5e** ( $\text{CDCl}_3$ , 600 MHz)

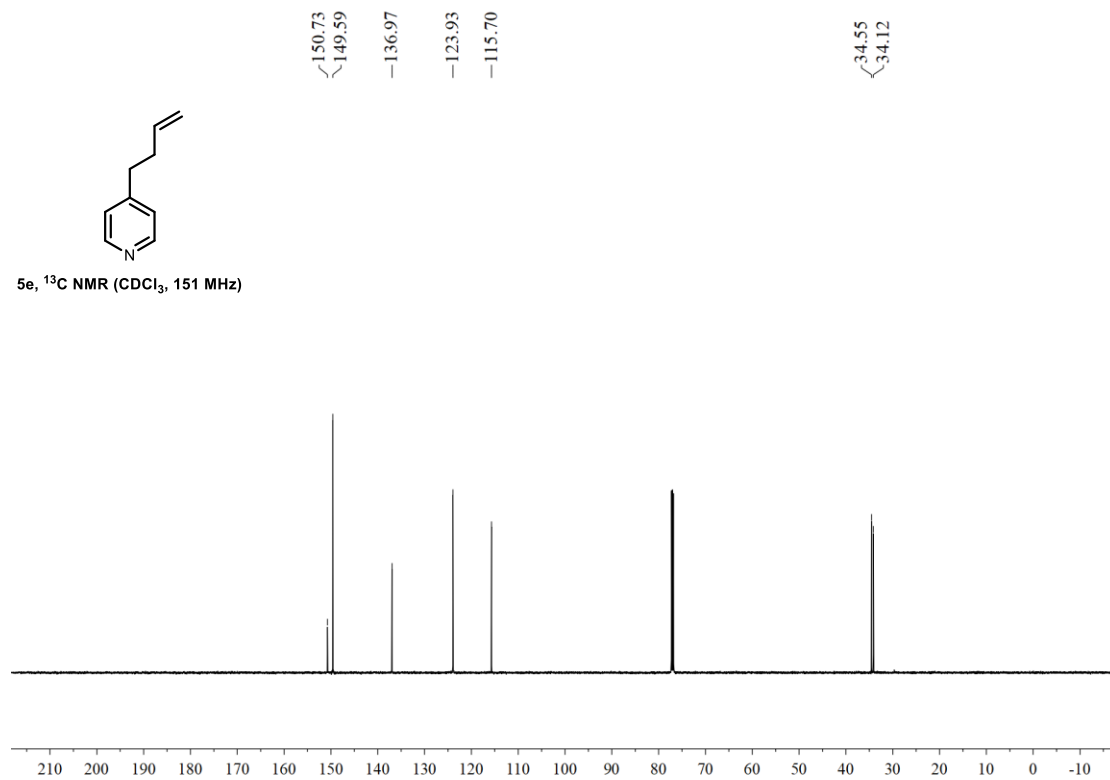

**Figure S82.**  $^{13}\text{C NMR}$  of **5e** ( $\text{CDCl}_3$ , 151 MHz)

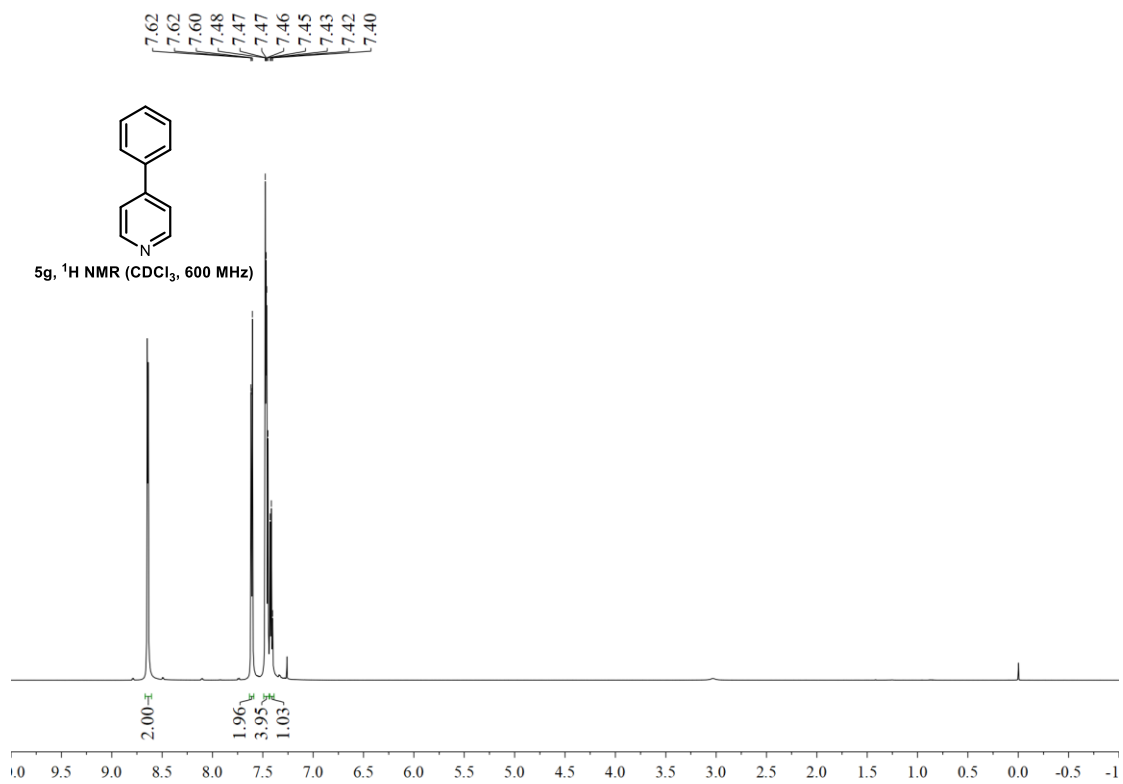

**Figure S83.** <sup>1</sup>H NMR of **5g** (CDCl<sub>3</sub>, 600 MHz)

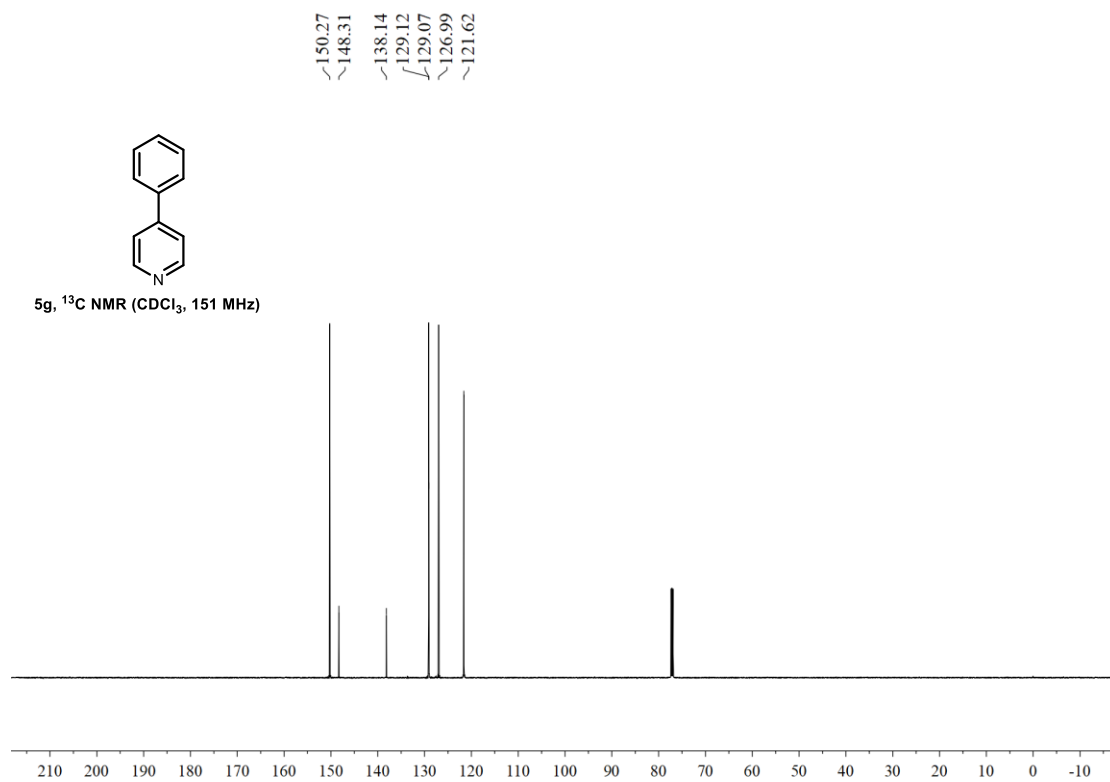

**Figure S84.** <sup>13</sup>C NMR of **5g** (CDCl<sub>3</sub>, 151 MHz)

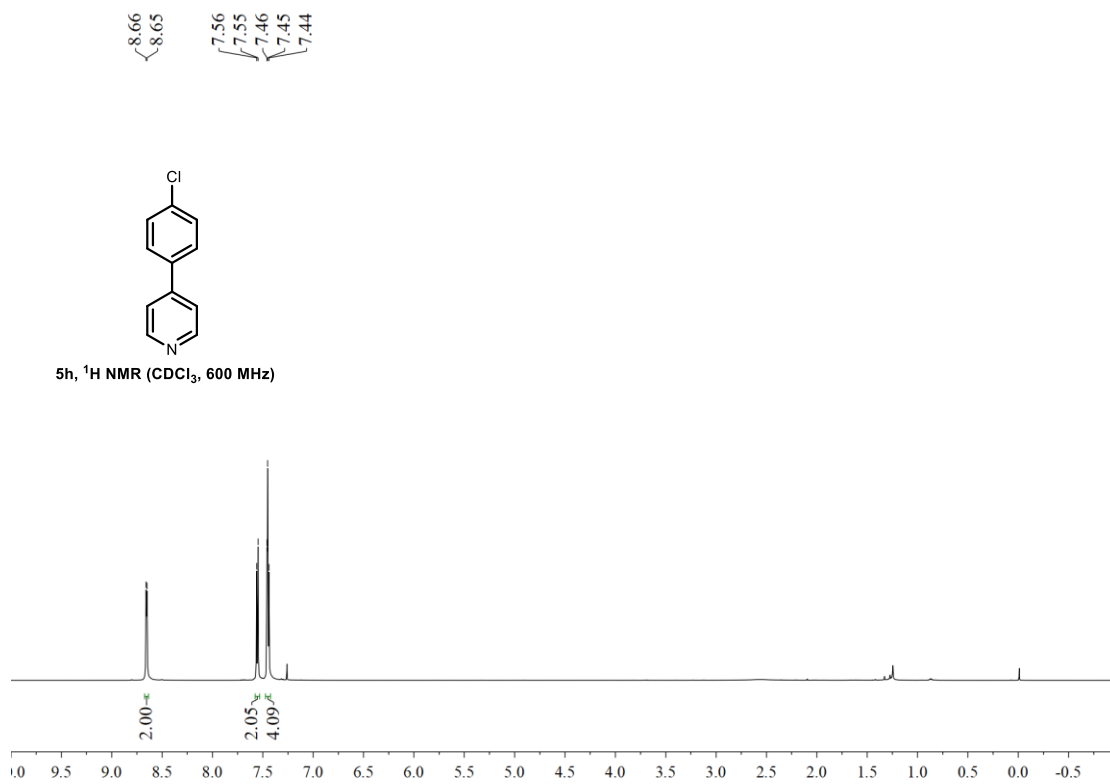

Figure S85.  $^1\text{H NMR}$  of 5h ( $\text{CDCl}_3$ , 600 MHz)

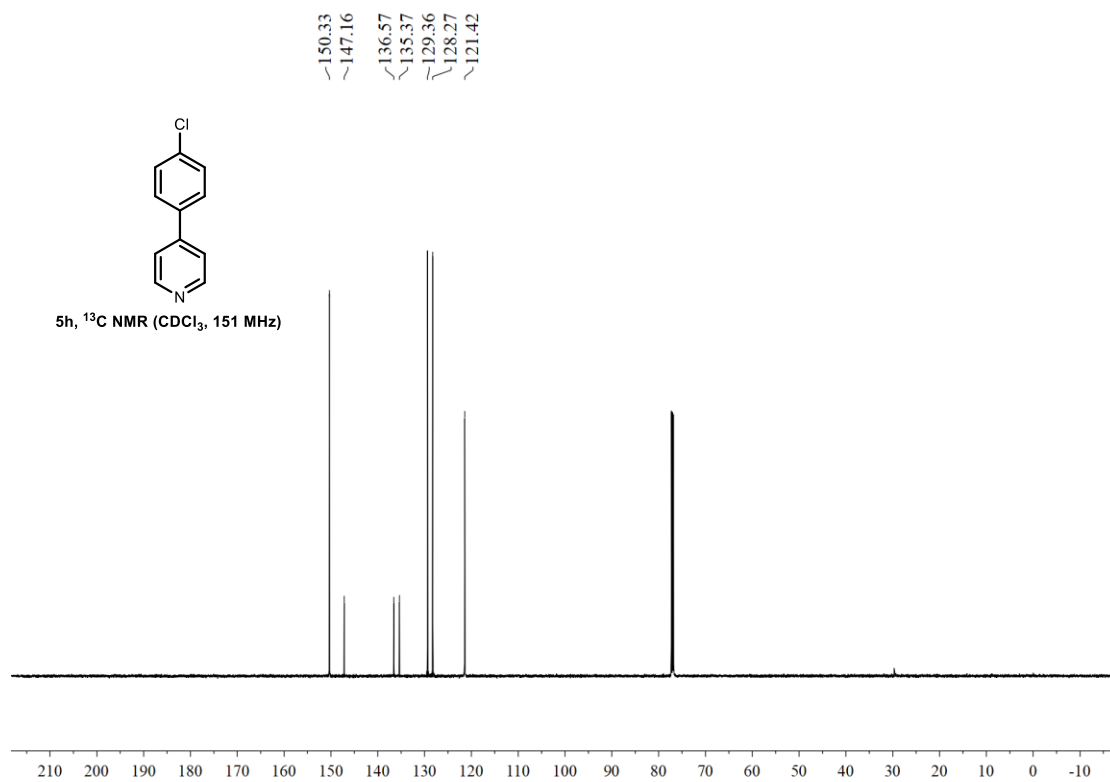

Figure S86.  $^{13}\text{C NMR}$  of 5h ( $\text{CDCl}_3$ , 151 MHz)

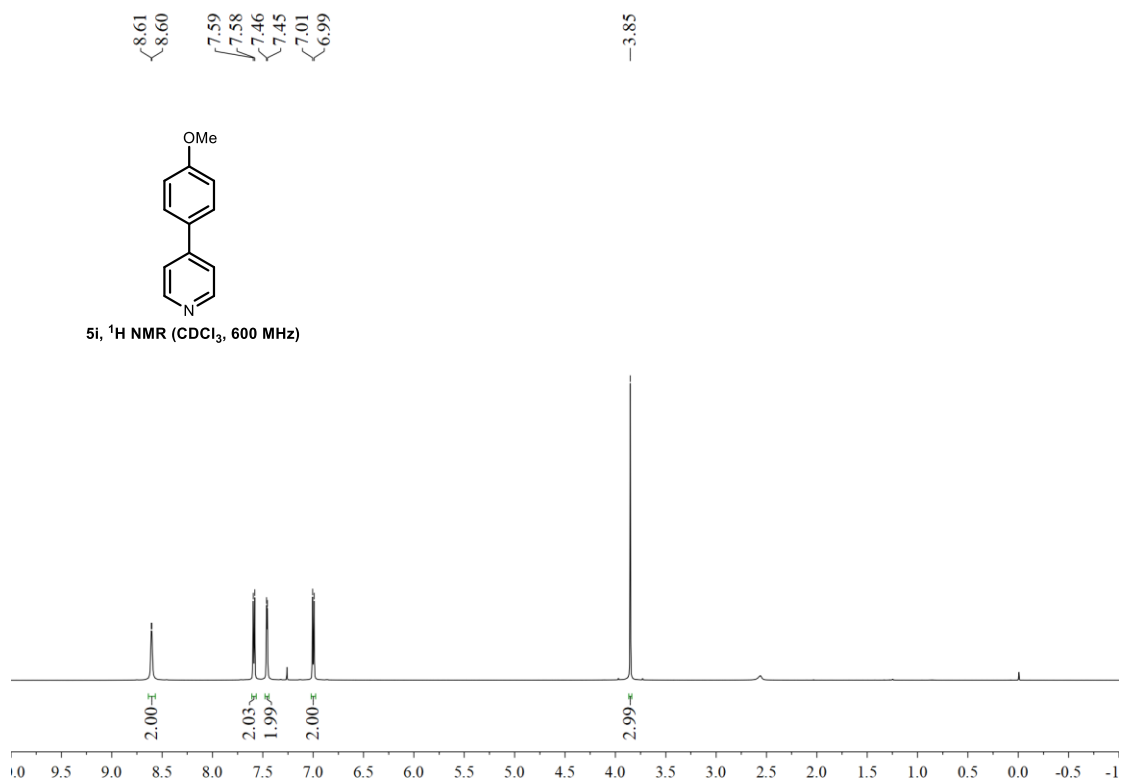

**Figure S87.**  $^1\text{H}$  NMR of **5i** ( $\text{CDCl}_3$ , 600 MHz)

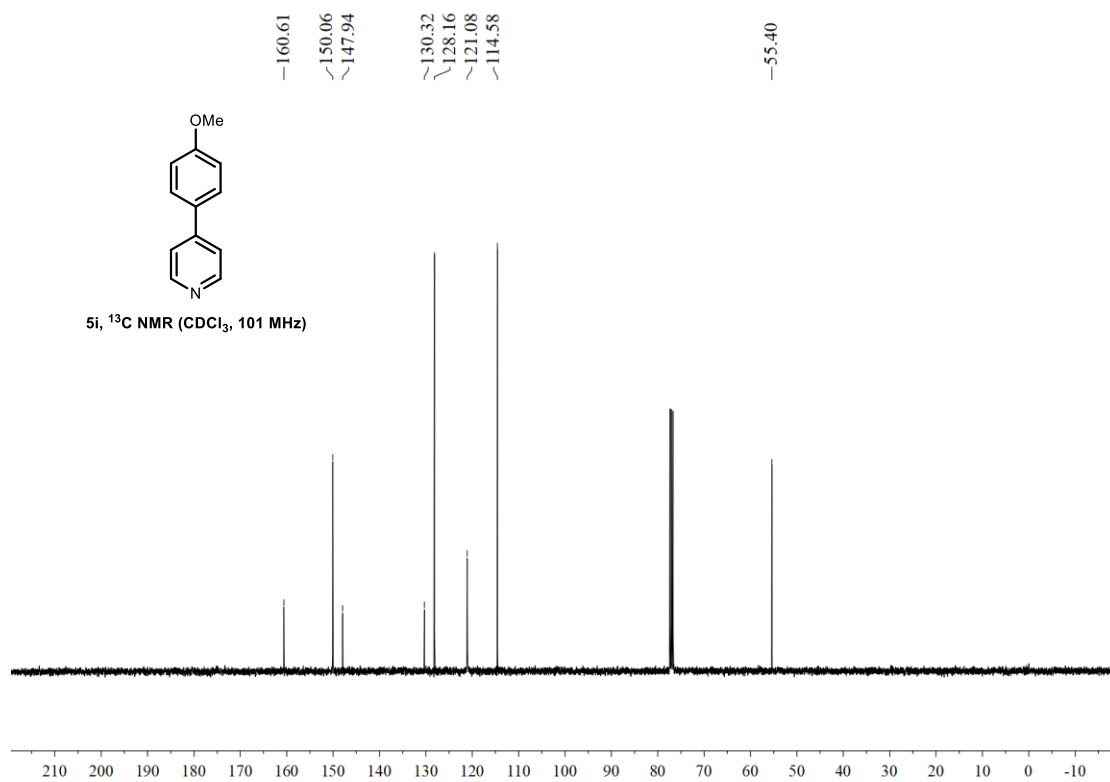

**Figure S88.**  $^{13}\text{C}$  NMR of **5i** ( $\text{CDCl}_3$ , 101 MHz)

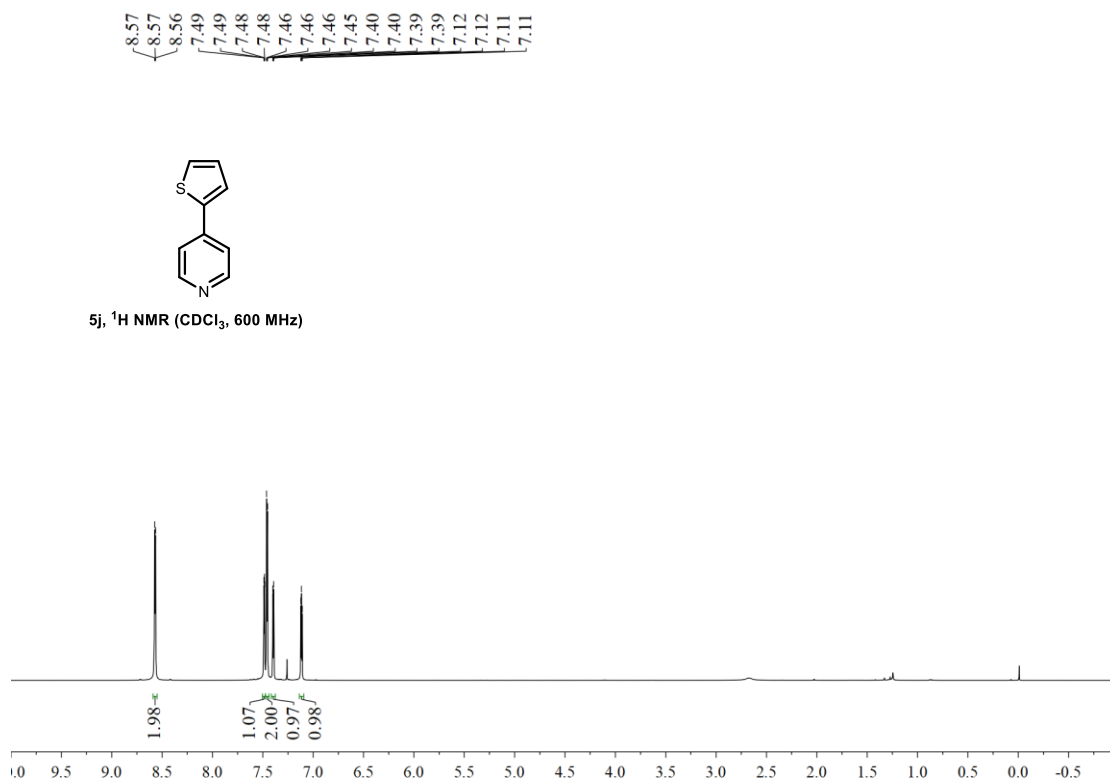

**Figure S89.** <sup>1</sup>H NMR of **5j** (CDCl<sub>3</sub>, 600 MHz)

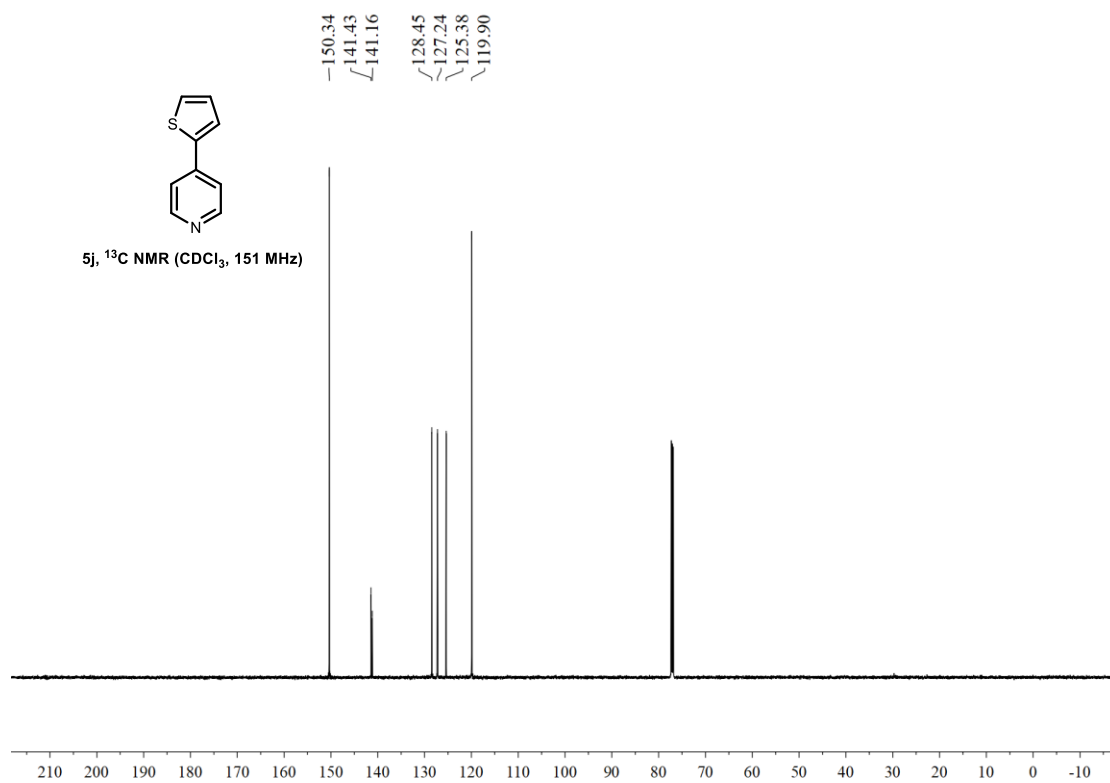

**Figure S90.** <sup>13</sup>C NMR of **5j** (CDCl<sub>3</sub>, 151 MHz)

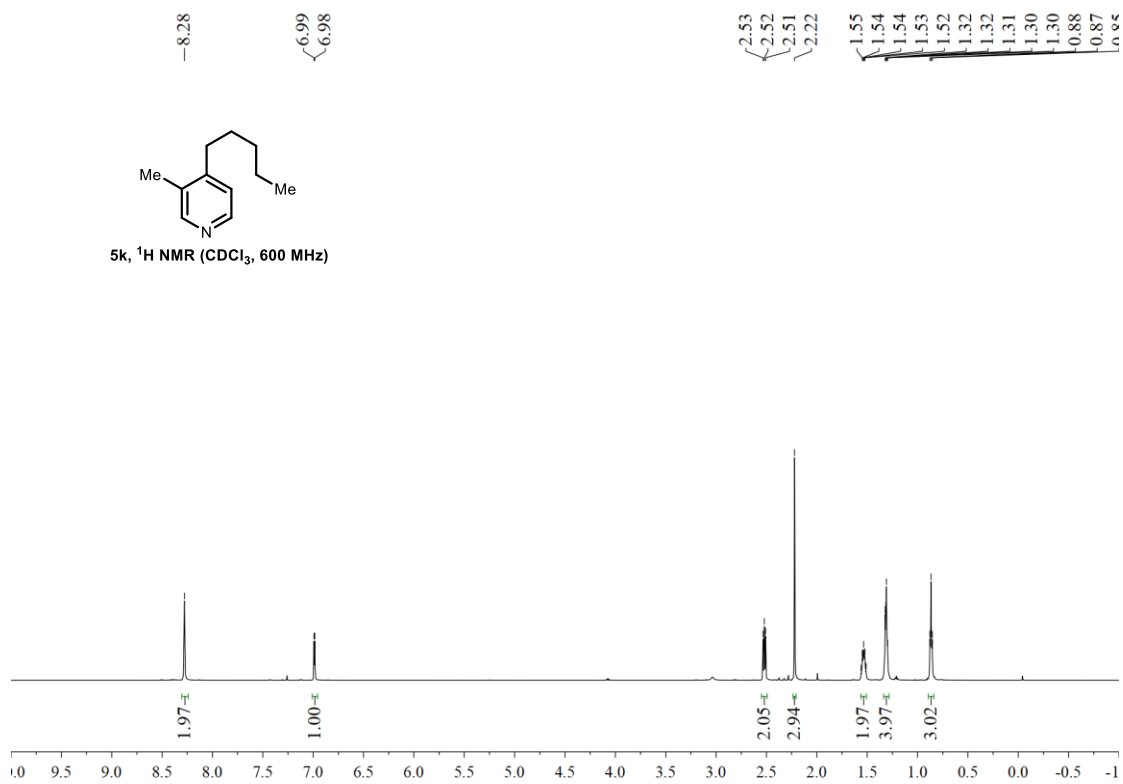

**Figure S91.  $^1\text{H}$  NMR of **5k** ( $\text{CDCl}_3$ , 600 MHz)**

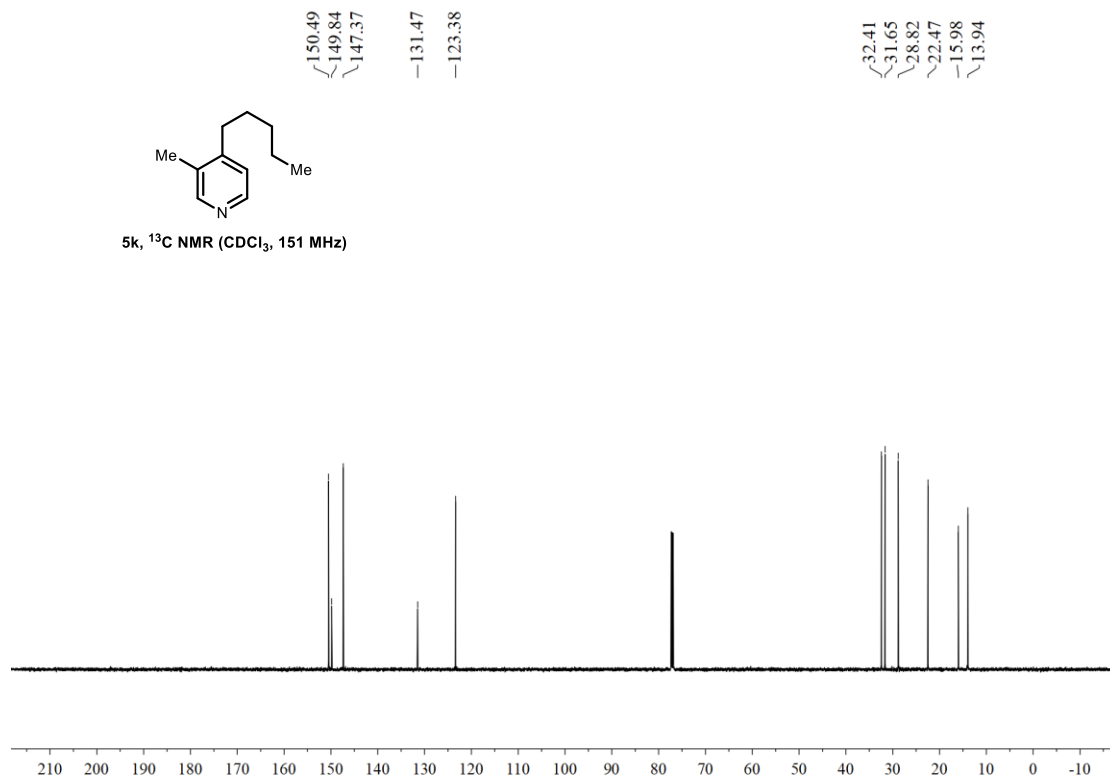

**Figure S92.  $^{13}\text{C}$  NMR of **5k** ( $\text{CDCl}_3$ , 151 MHz)**

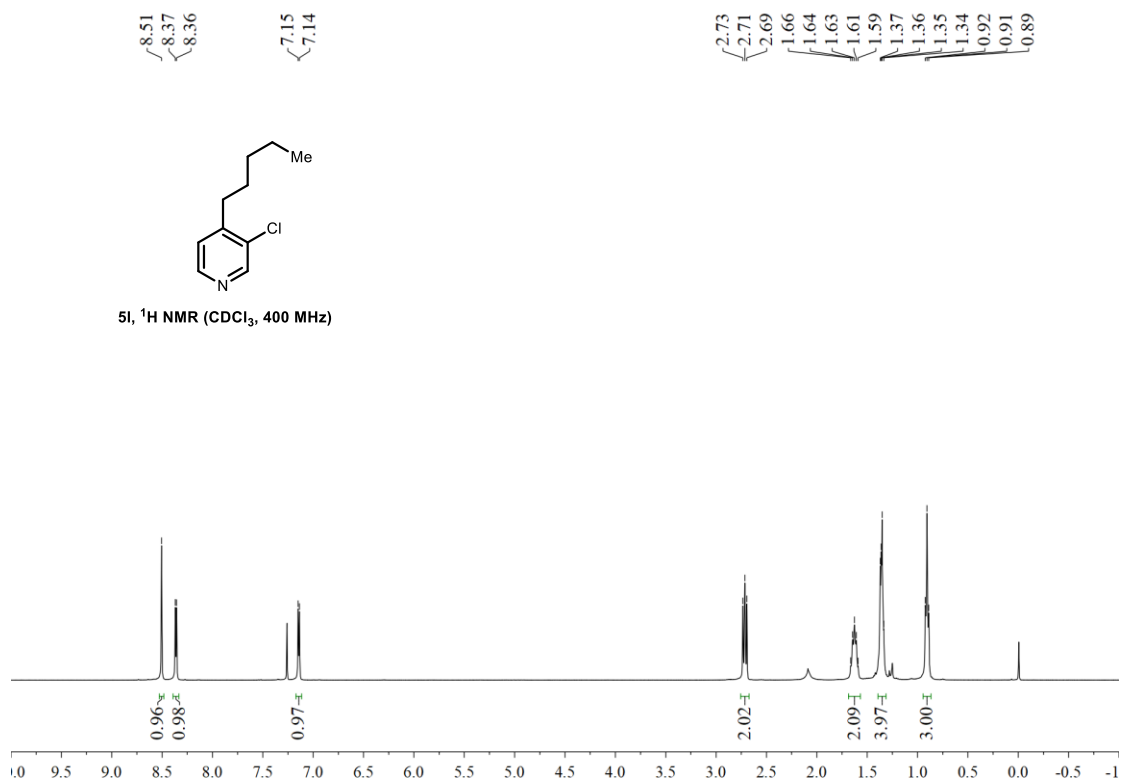

Figure S93.  $^1\text{H}$  NMR of **51** (CDCl<sub>3</sub>, 400 MHz)

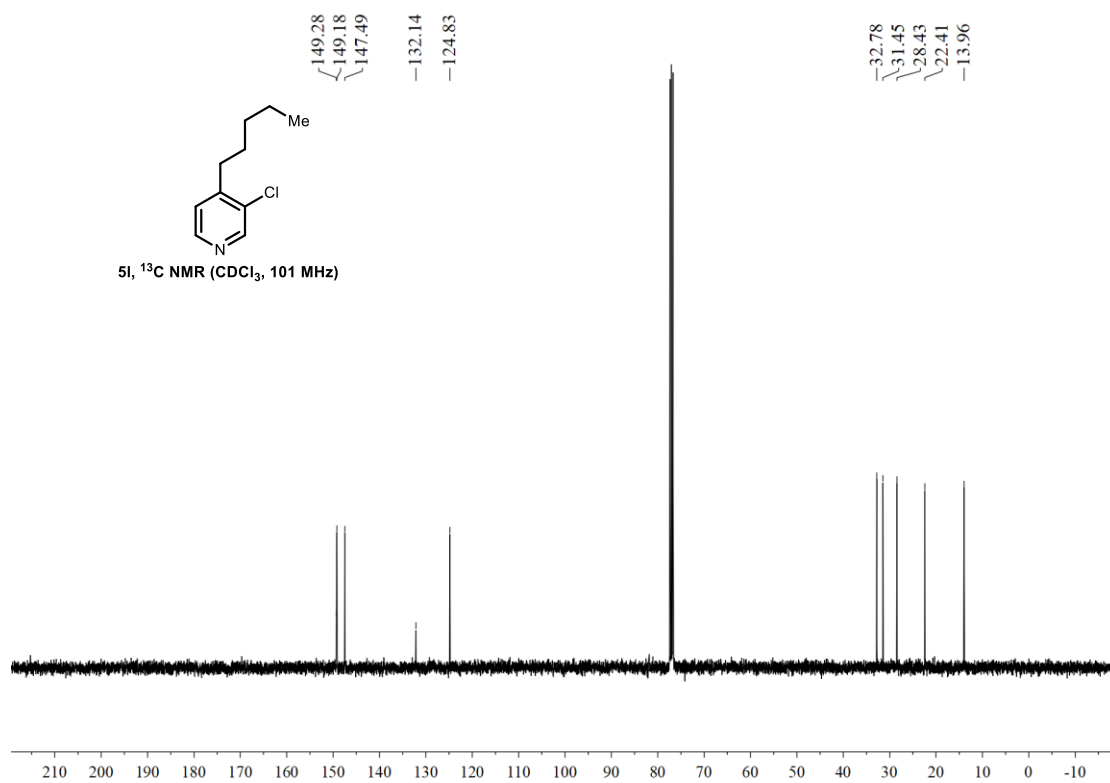

Figure S94.  $^{13}\text{C}$  NMR of **51** (CDCl<sub>3</sub>, 101 MHz)

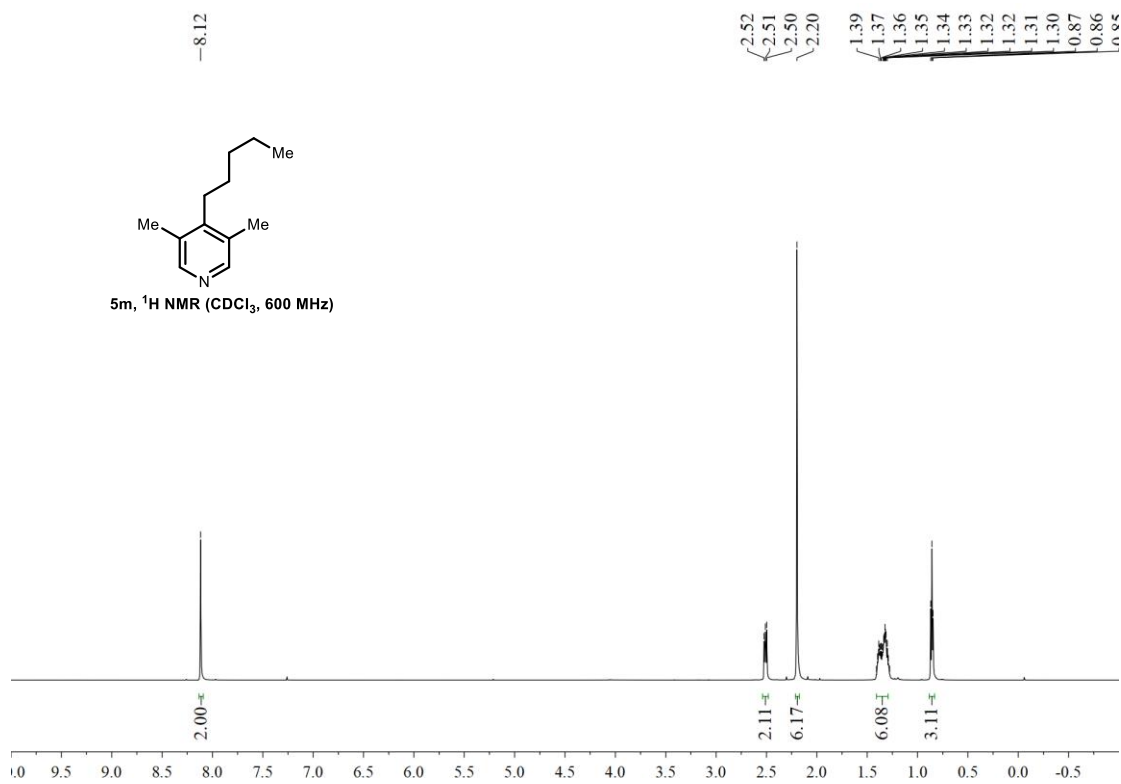

**Figure S95. <sup>1</sup>H NMR of 5m (CDCl<sub>3</sub>, 600 MHz)**

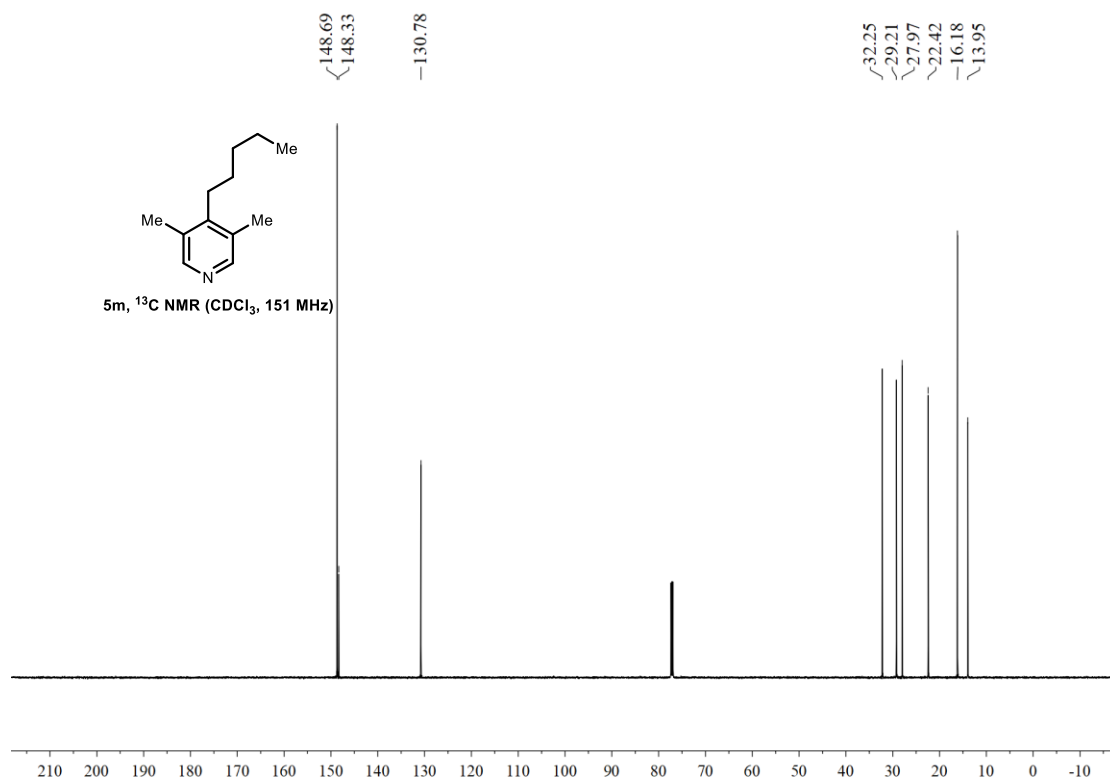

**Figure S96. <sup>13</sup>C NMR of 5m (CDCl<sub>3</sub>, 151 MHz)**



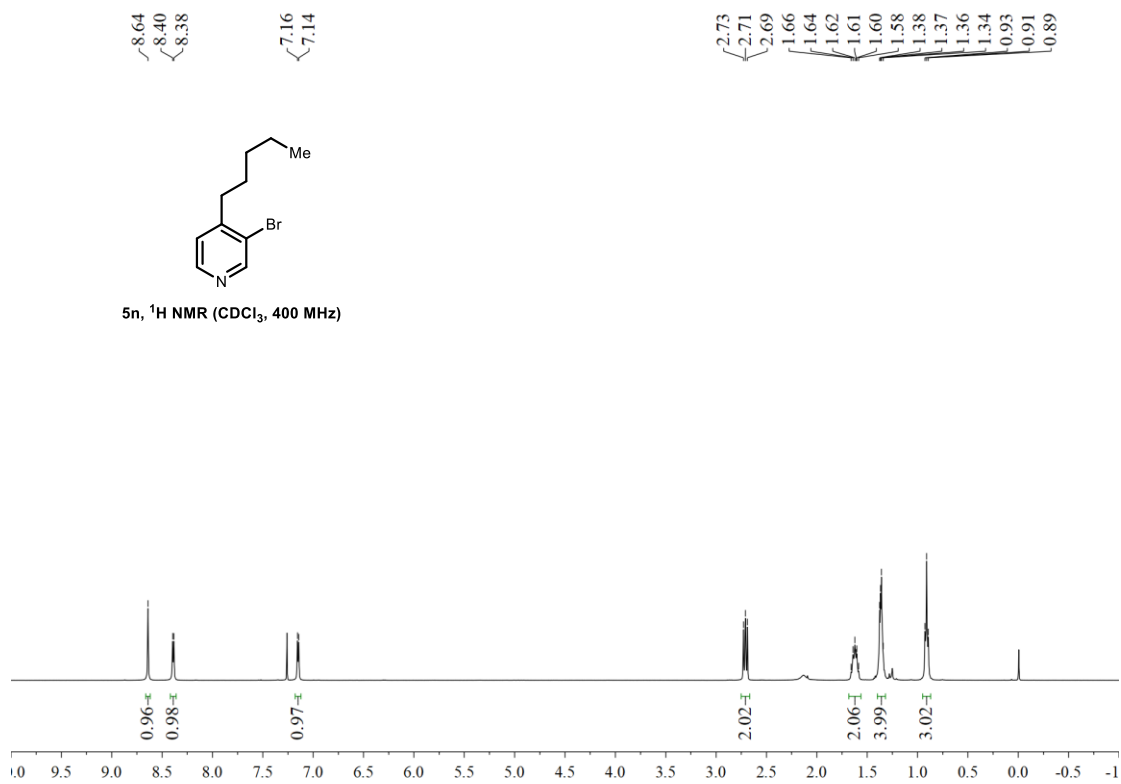

**Figure S97.**  $^1\text{H NMR}$  of **5n** ( $\text{CDCl}_3$ , 400 MHz)

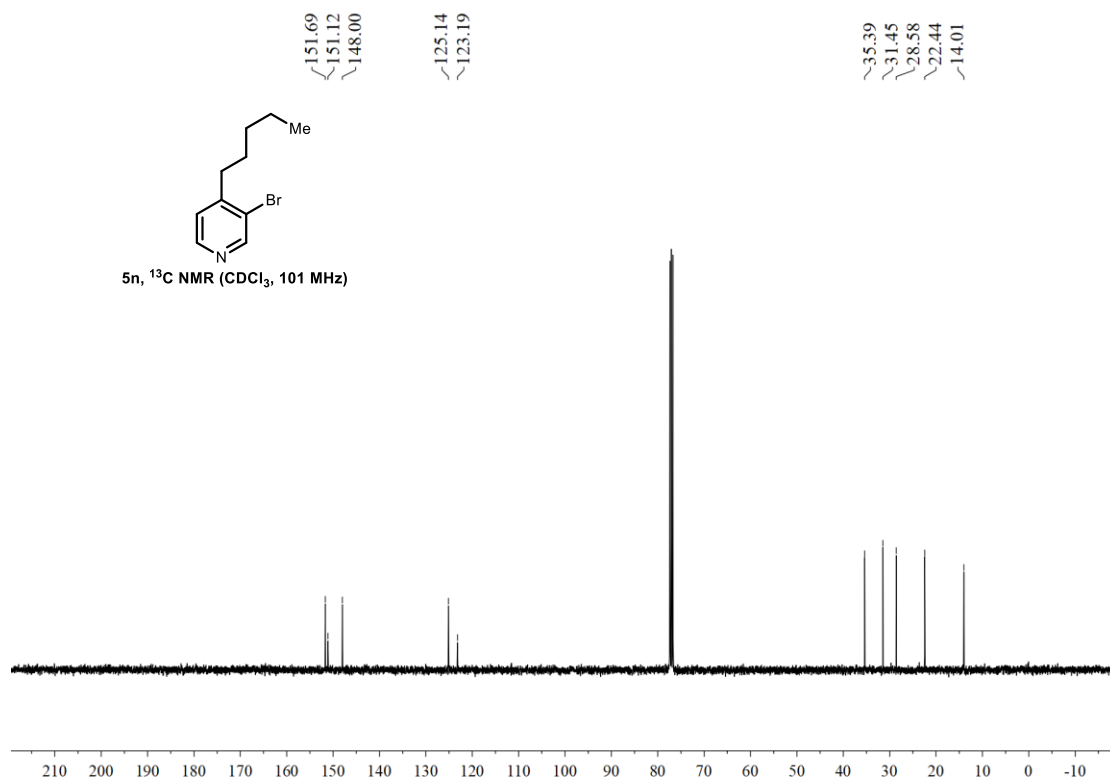

**Figure S98.**  $^{13}\text{C NMR}$  of **5n** ( $\text{CDCl}_3$ , 101 MHz)

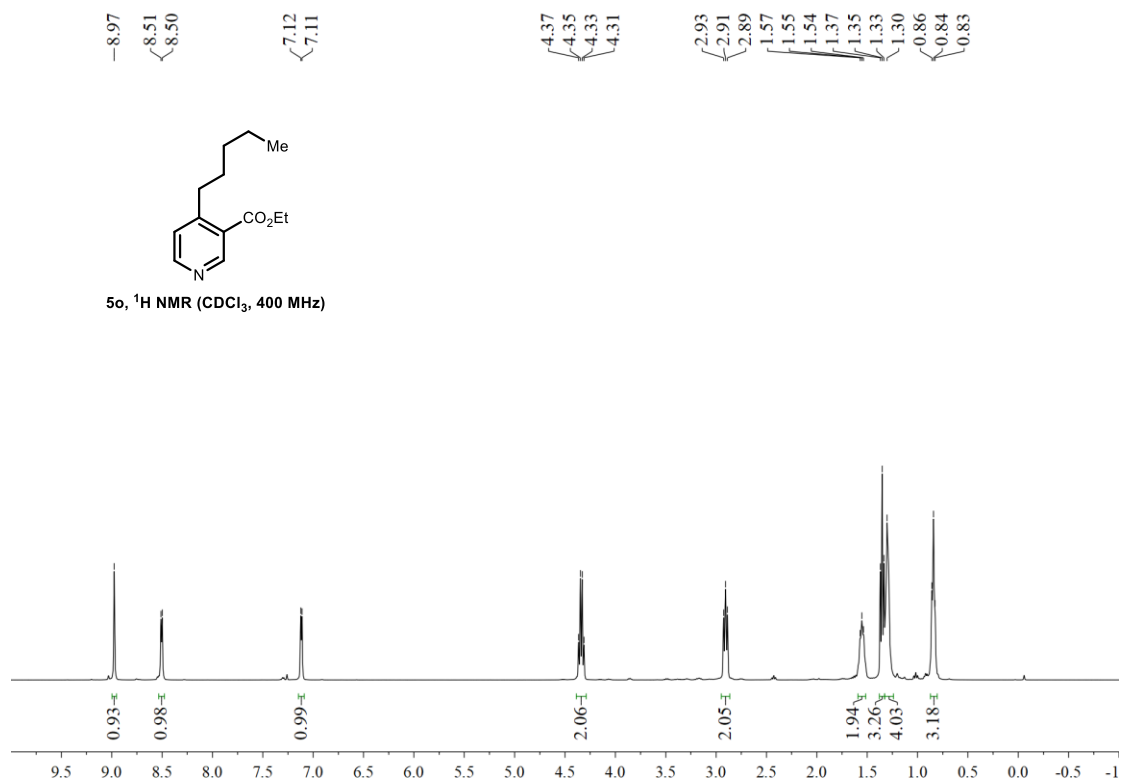

**Figure S99.**  $^1\text{H}$  NMR of **5o** ( $\text{CDCl}_3$ , 400 MHz)

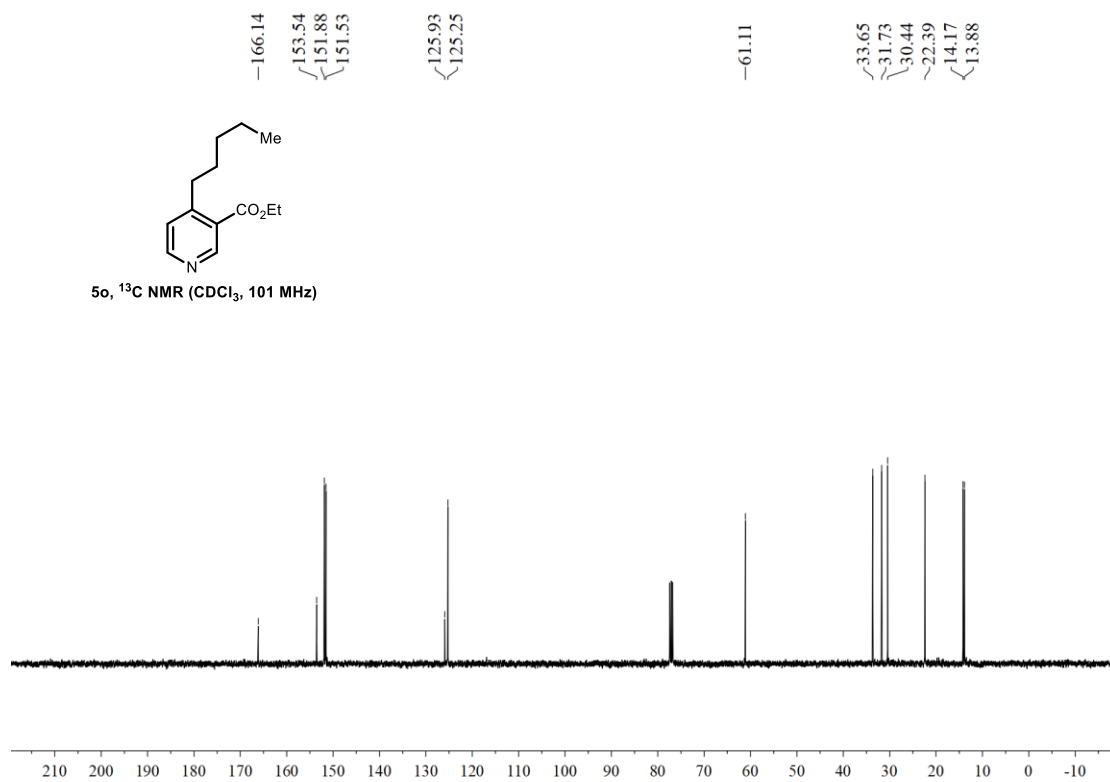

**Figure S100.**  $^{13}\text{C}$  NMR of **5o** ( $\text{CDCl}_3$ , 101 MHz)

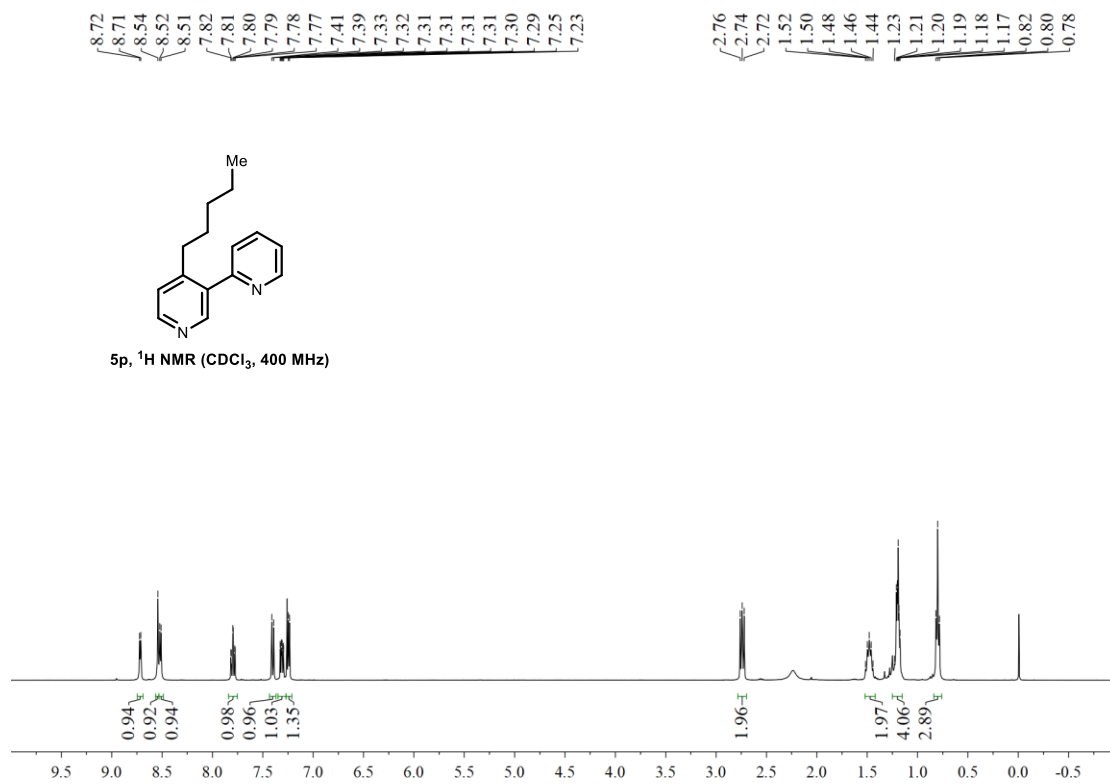

**Figure S101.**  $^1\text{H NMR}$  of **5p** ( $\text{CDCl}_3$ , 400 MHz)

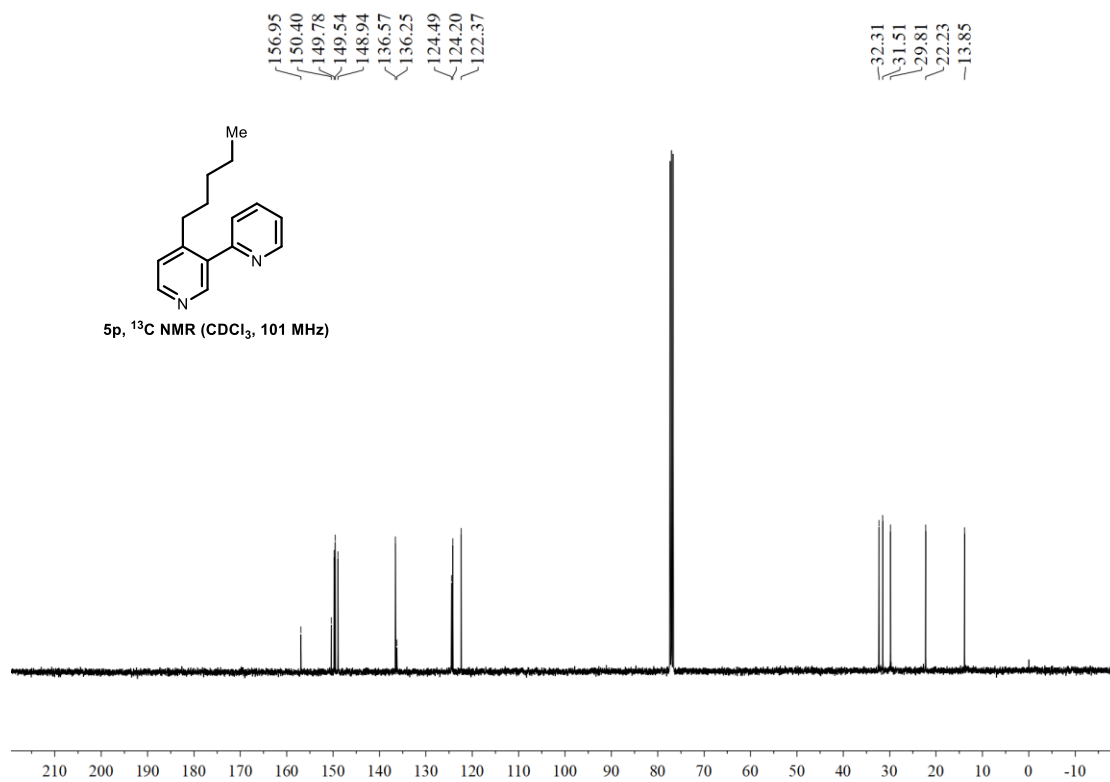

**Figure S102.**  $^{13}\text{C NMR}$  of **5p** ( $\text{CDCl}_3$ , 101 MHz)

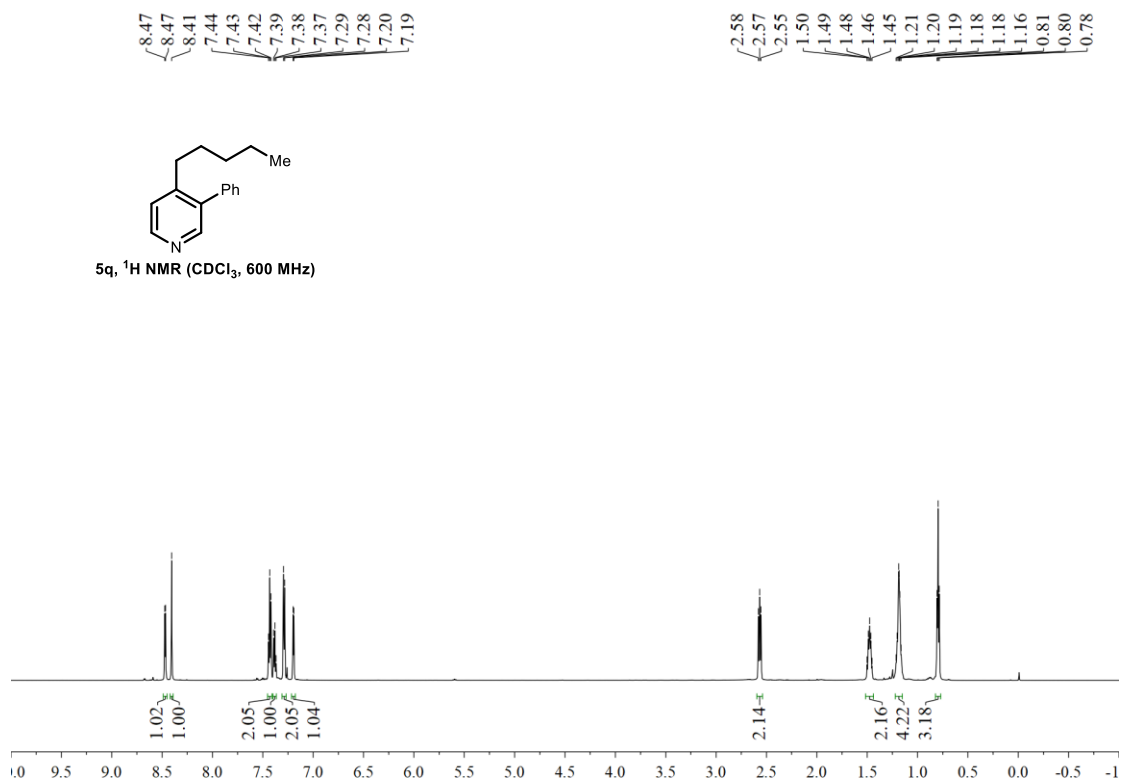

**Figure S103.  $^1\text{H}$  NMR of **5q** ( $\text{CDCl}_3$ , 600 MHz)**

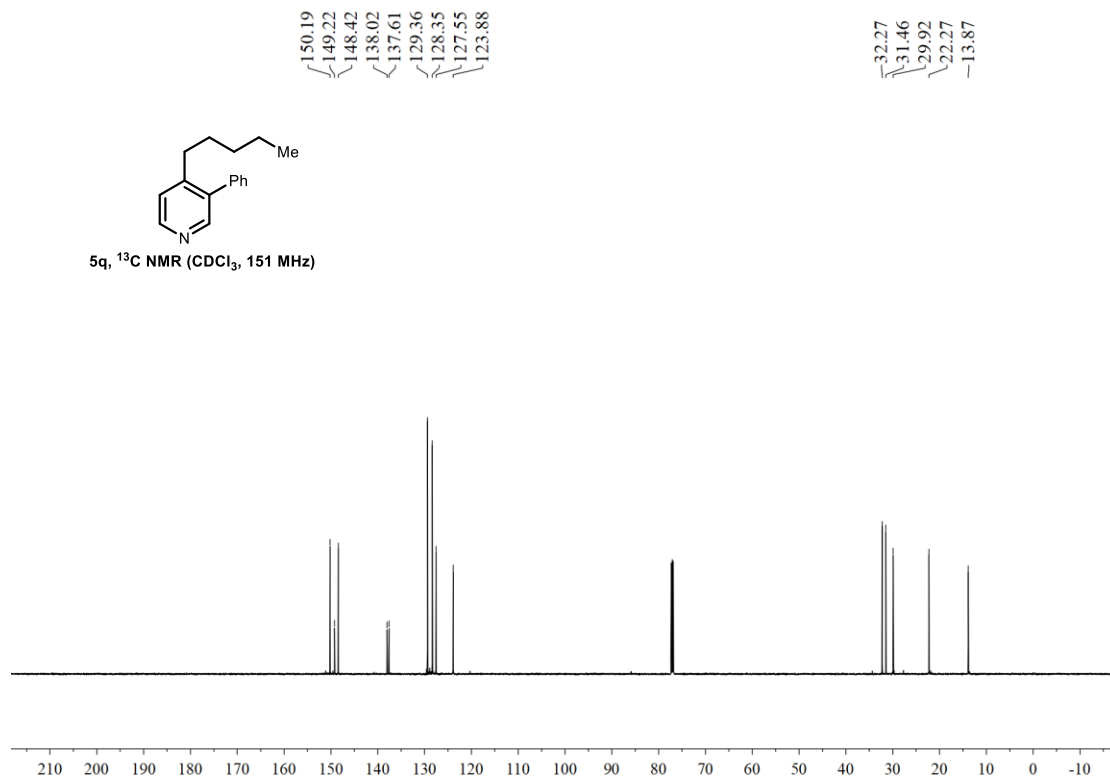

**Figure S104.  $^{13}\text{C}$  NMR of **5q** ( $\text{CDCl}_3$ , 151 MHz)**

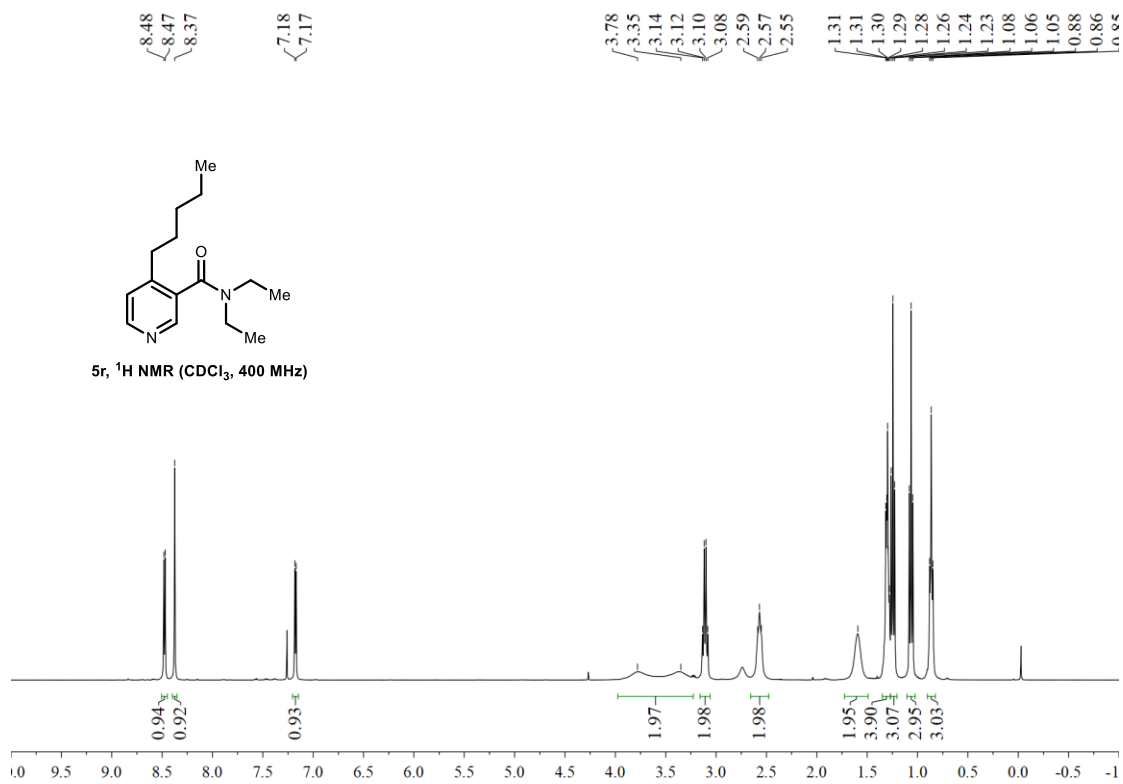

**Figure S105.**  $^1\text{H}$  NMR of **5r** ( $\text{CDCl}_3$ , 400 MHz)

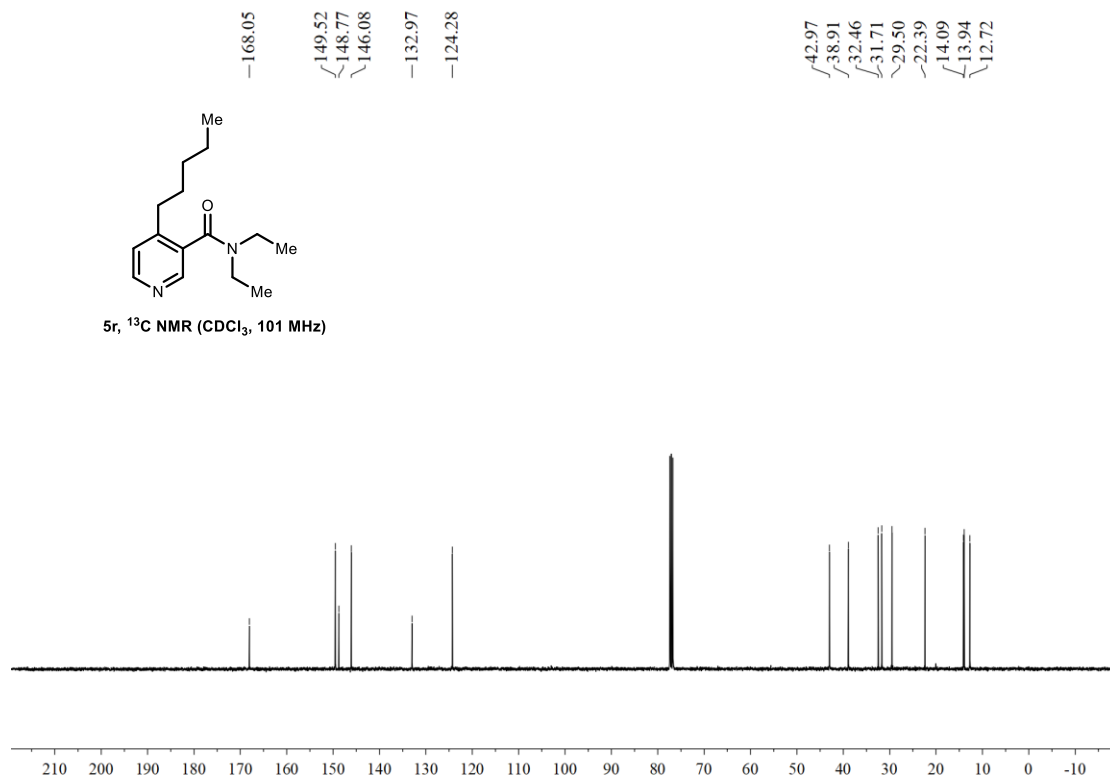

**Figure S106.**  $^{13}\text{C}$  NMR of **5r** ( $\text{CDCl}_3$ , 101 MHz)

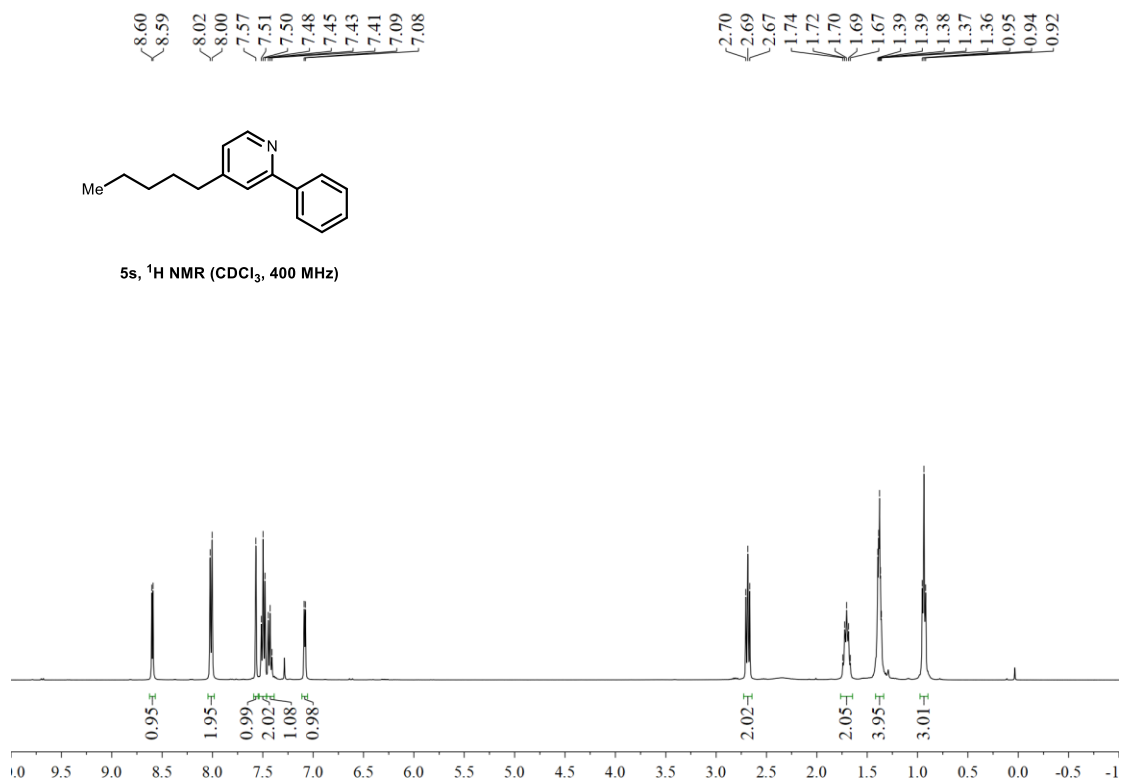

**Figure S107.**  $^1\text{H NMR}$  of **5s** ( $\text{CDCl}_3$ , 400 MHz)

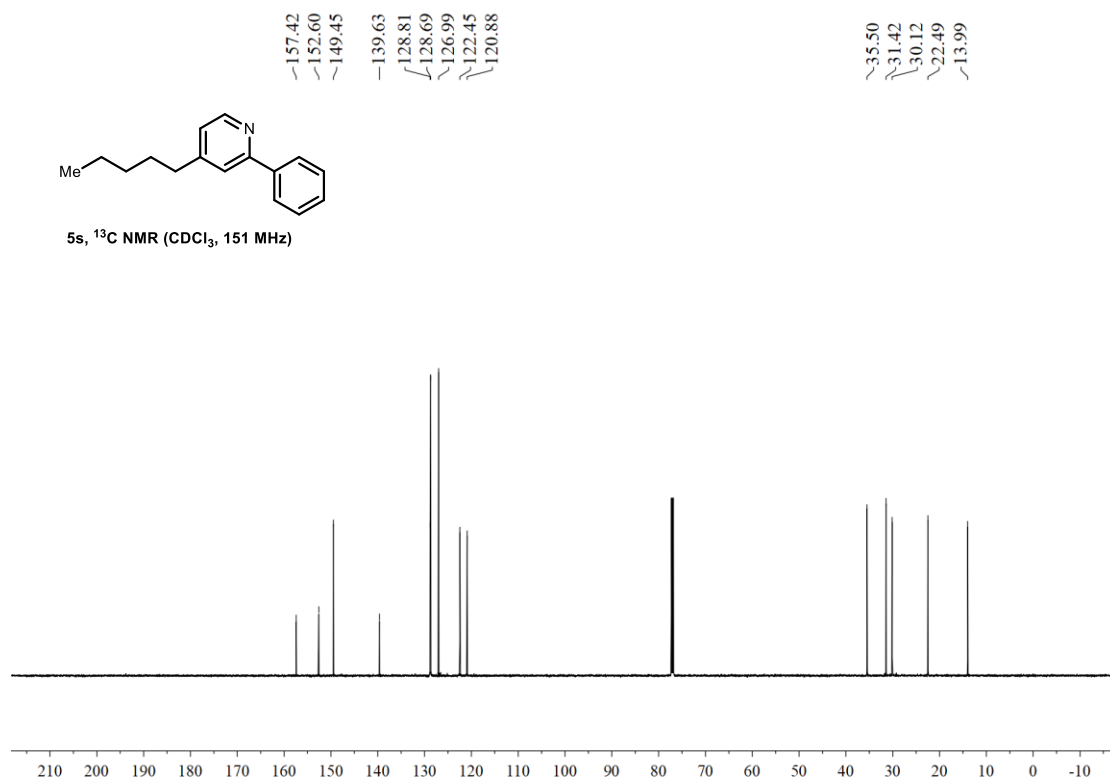

**Figure S108.**  $^{13}\text{C NMR}$  of **5s** ( $\text{CDCl}_3$ , 151 MHz)

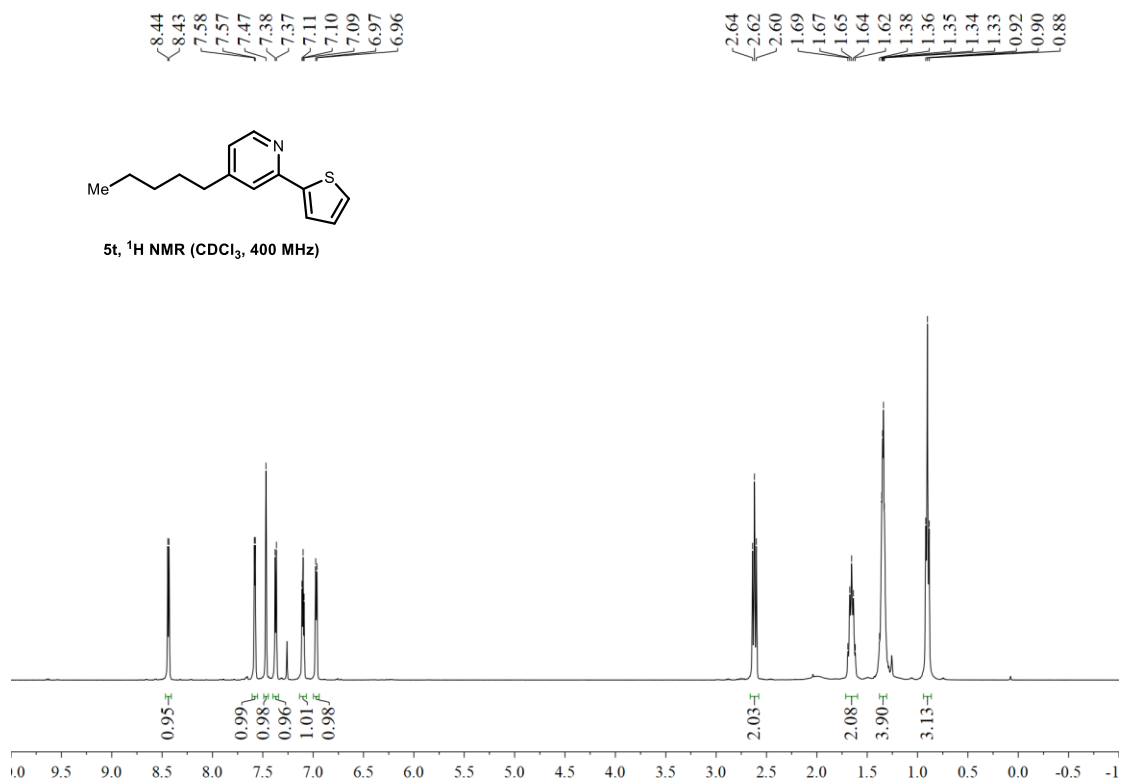

**Figure S109.**  $^1\text{H NMR}$  of **5t** ( $\text{CDCl}_3$ , 400 MHz)

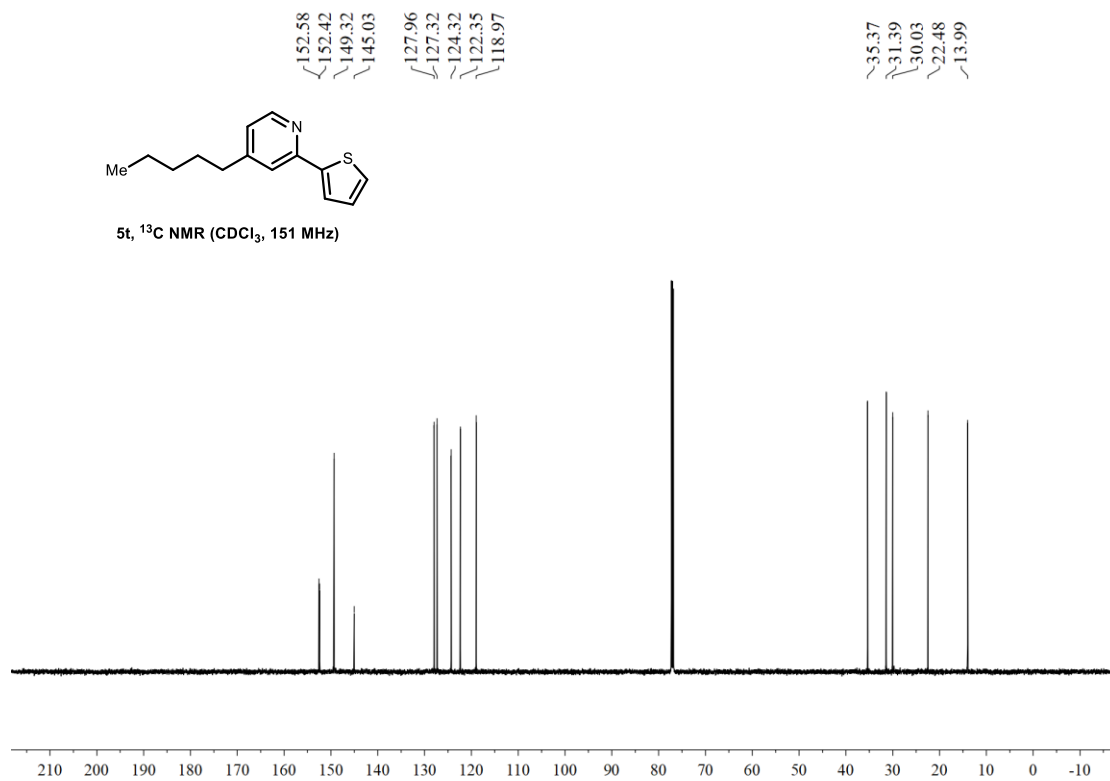

**Figure S110.**  $^{13}\text{C NMR}$  of **5t** ( $\text{CDCl}_3$ , 151 MHz)

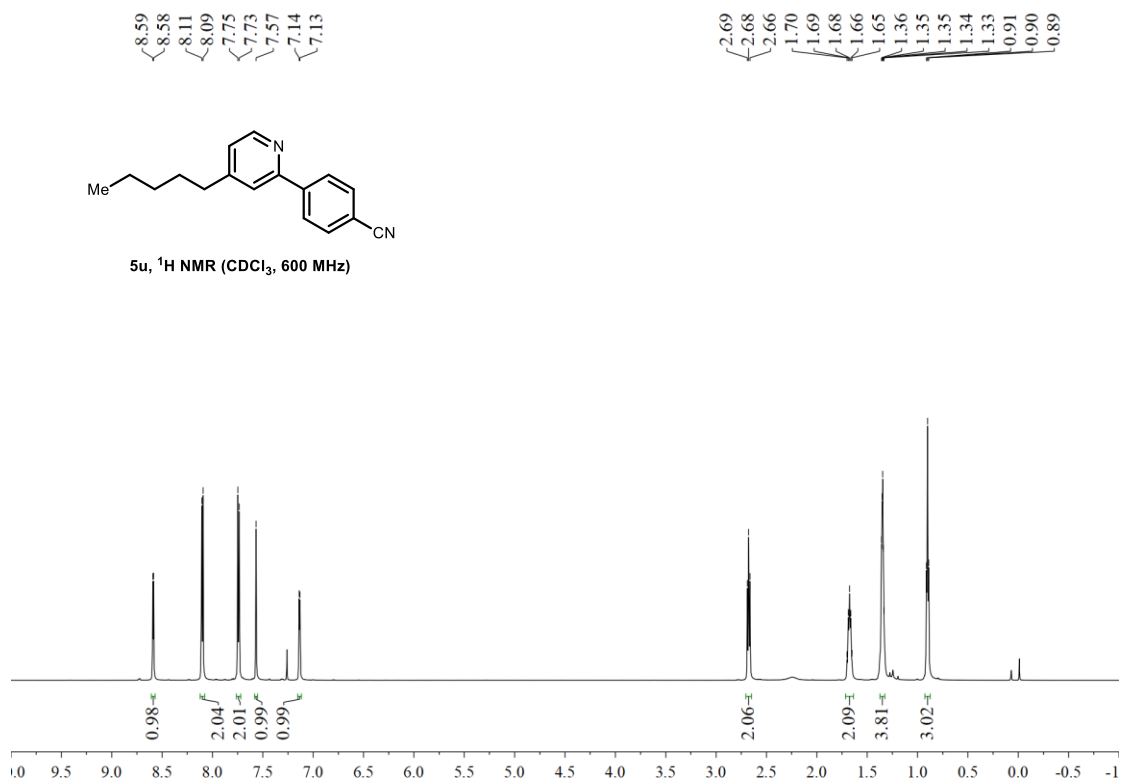

**Figure S11.**  $^1\text{H}$  NMR of **5u** (CDCl<sub>3</sub>, 600 MHz)

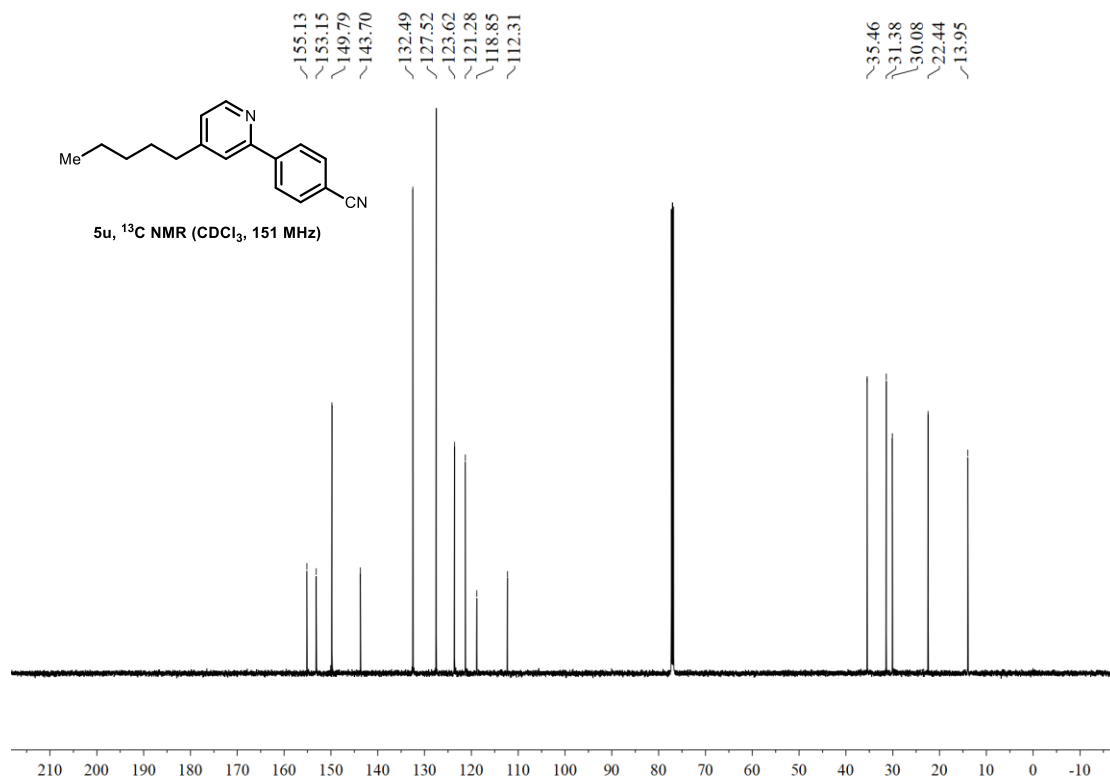

**Figure S12.**  $^{13}\text{C}$  NMR of **5u** (CDCl<sub>3</sub>, 151 MHz)



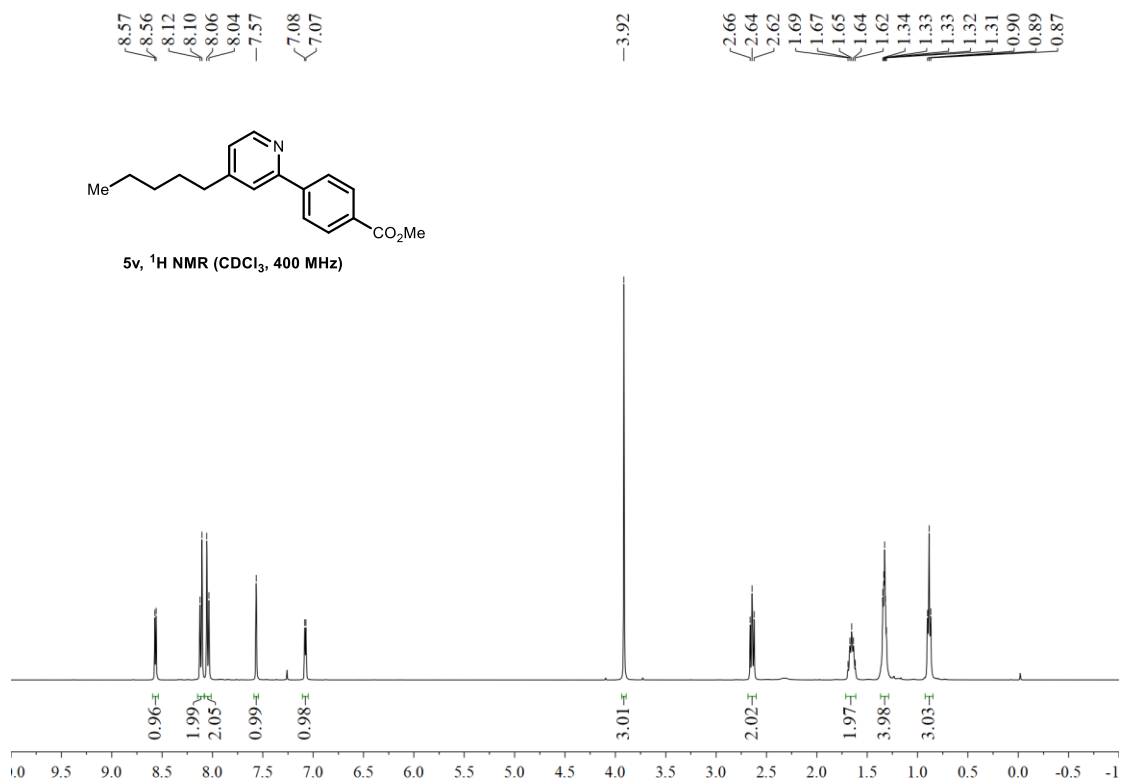

**Figure S113.**  $^1\text{H}$  NMR of **5v** ( $\text{CDCl}_3$ , 400 MHz)

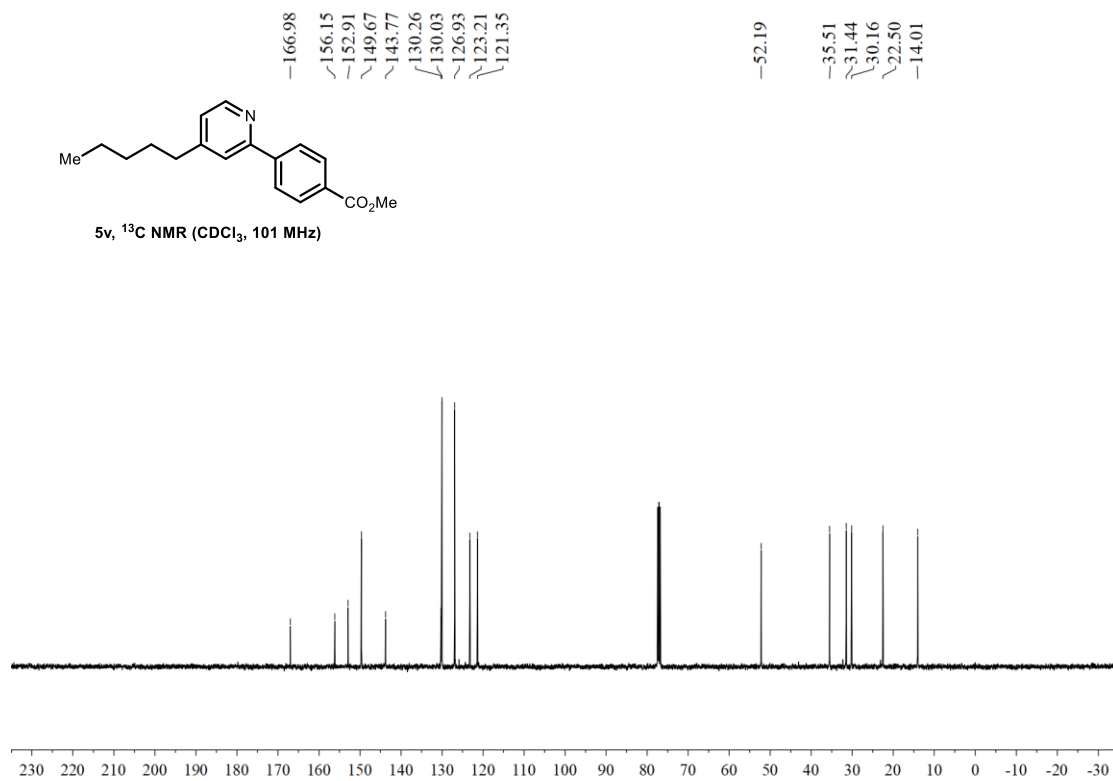

**Figure S114.**  $^{13}\text{C}$  NMR of **5v** ( $\text{CDCl}_3$ , 101 MHz)

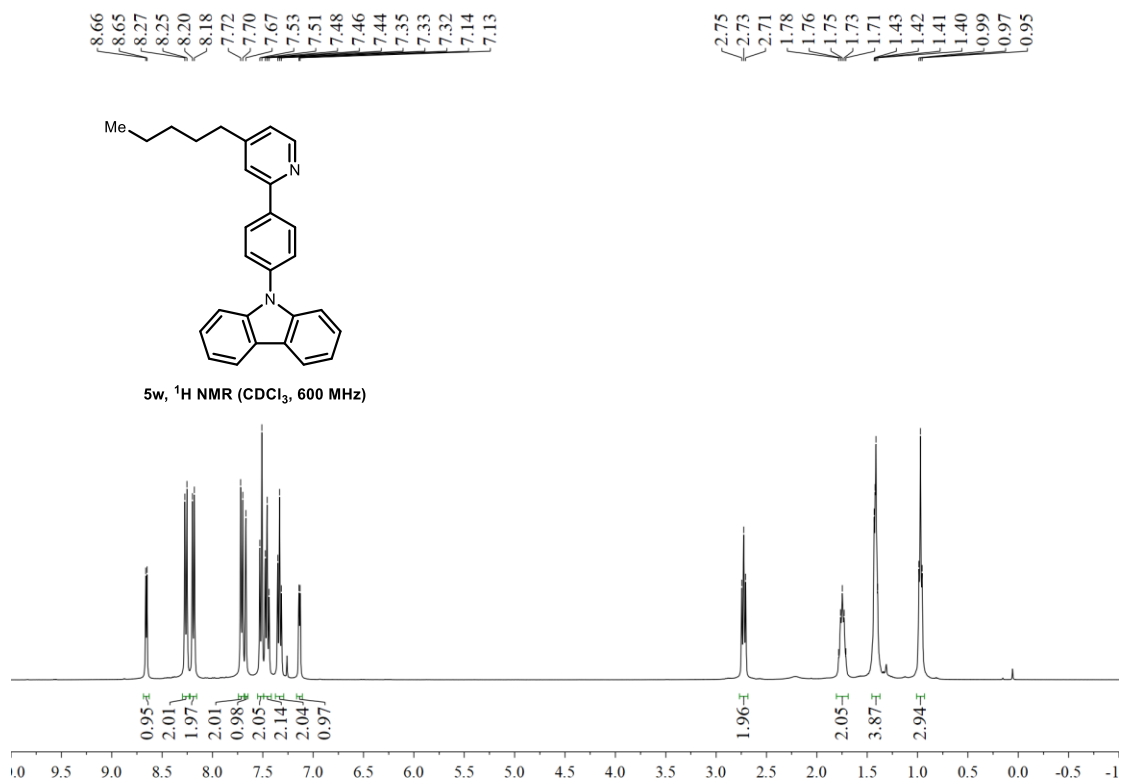

**Figure S115.**  $^1\text{H NMR}$  of **5w** ( $\text{CDCl}_3$ , 600 MHz)

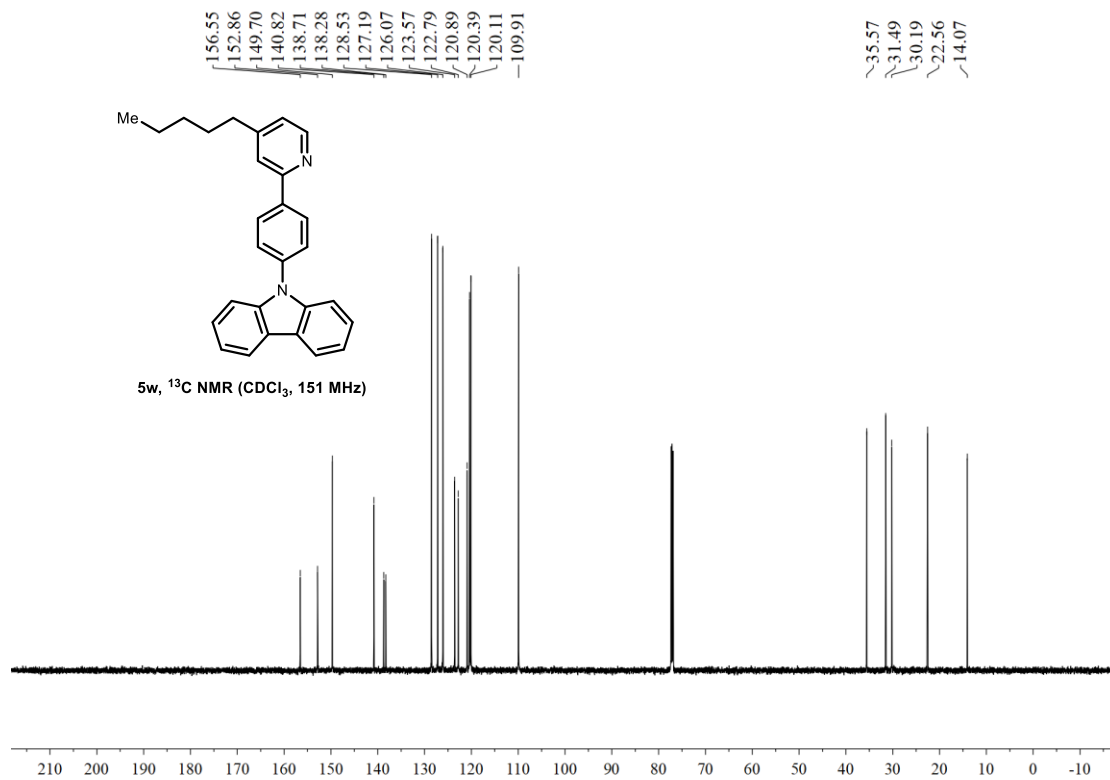

**Figure S116.**  $^{13}\text{C NMR}$  of **5w** ( $\text{CDCl}_3$ , 151 MHz)

8.76  
8.75  
8.08  
8.07  
7.94  
7.71  
7.69  
7.53  
7.52  
7.51  
7.48  
7.47  
7.46  
7.45  
7.45

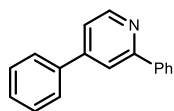

5x,  $^1\text{H}$  NMR ( $\text{CDCl}_3$ , 600 MHz)

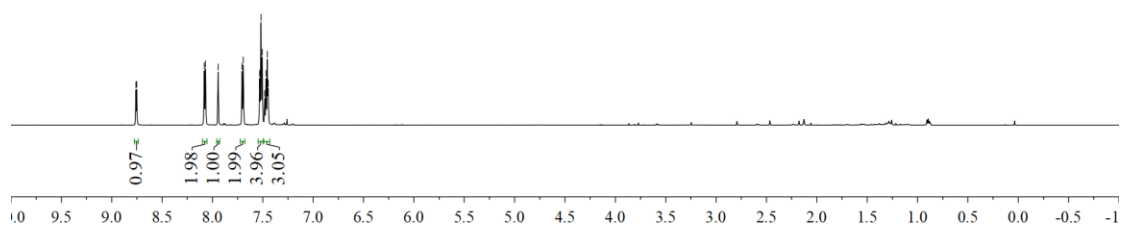

Figure S117.  $^1\text{H}$  NMR of 5x ( $\text{CDCl}_3$ , 600 MHz)

158.08  
150.09  
149.39  
139.46  
138.52  
129.19  
129.13  
128.85  
127.14  
127.12  
127.11  
120.33  
118.83

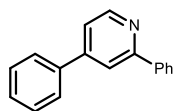

5x,  $^{13}\text{C}$  NMR ( $\text{CDCl}_3$ , 151 MHz)

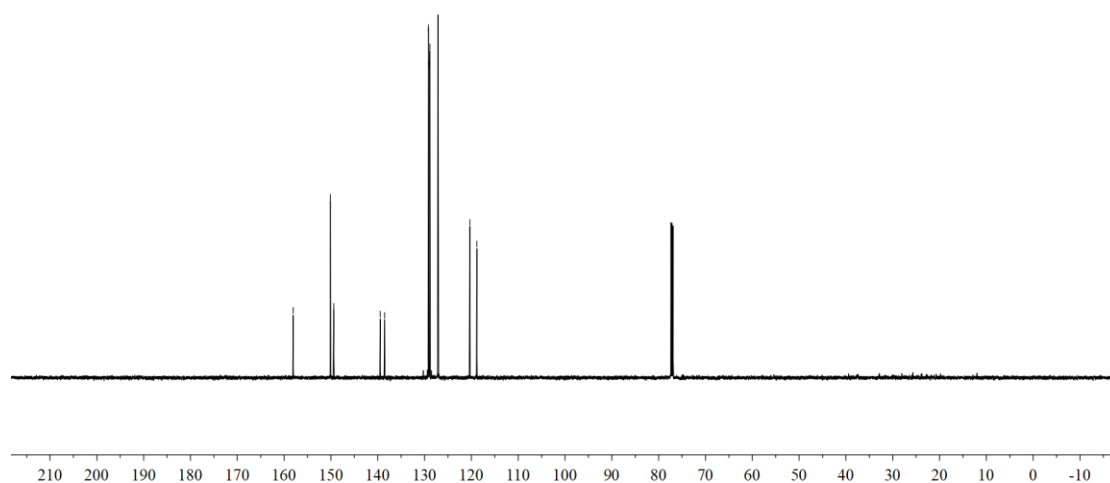

Figure S118.  $^{13}\text{C}$  NMR of 5x ( $\text{CDCl}_3$ , 151 MHz)

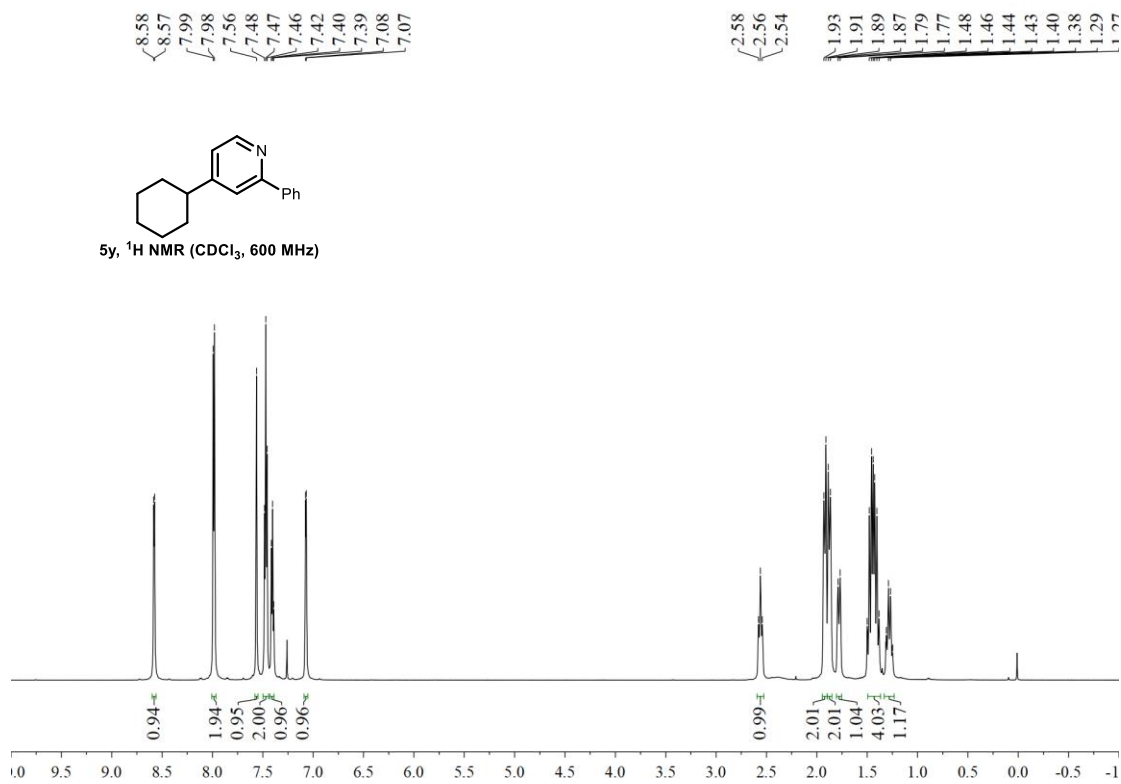

Figure S119.  $^1\text{H NMR}$  of **5y** ( $\text{CDCl}_3$ , 600 MHz)

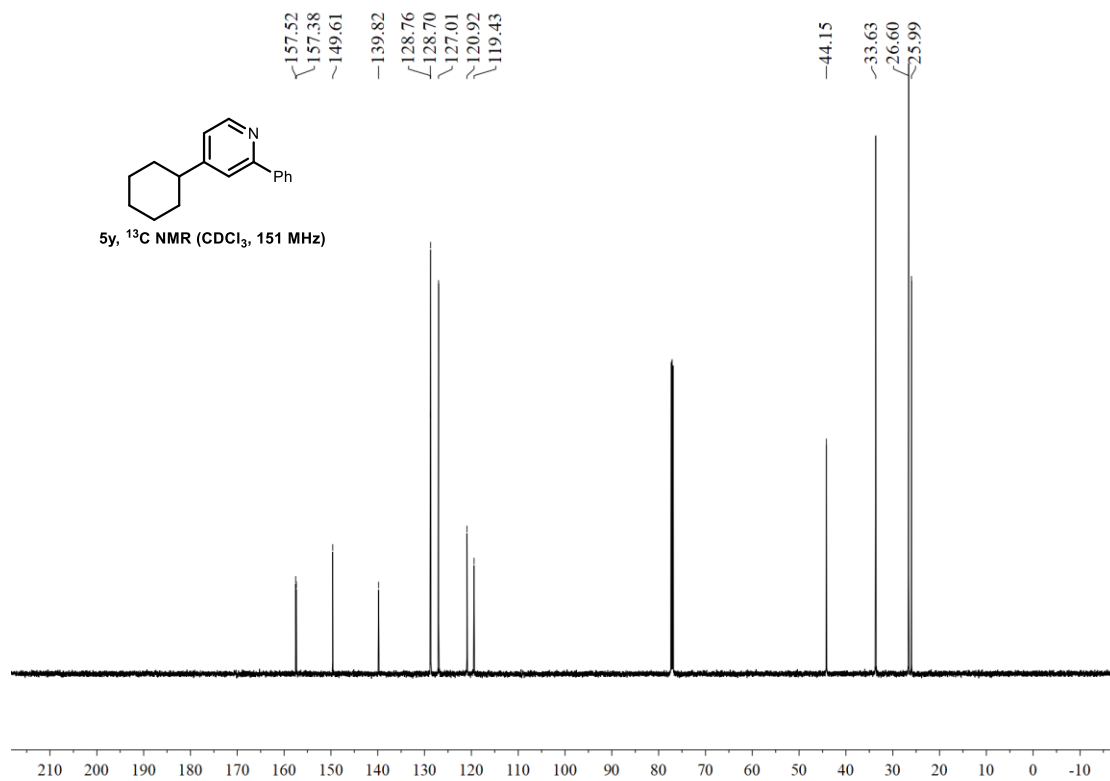

Figure S120.  $^{13}\text{C NMR}$  of **5y** ( $\text{CDCl}_3$ , 151 MHz)

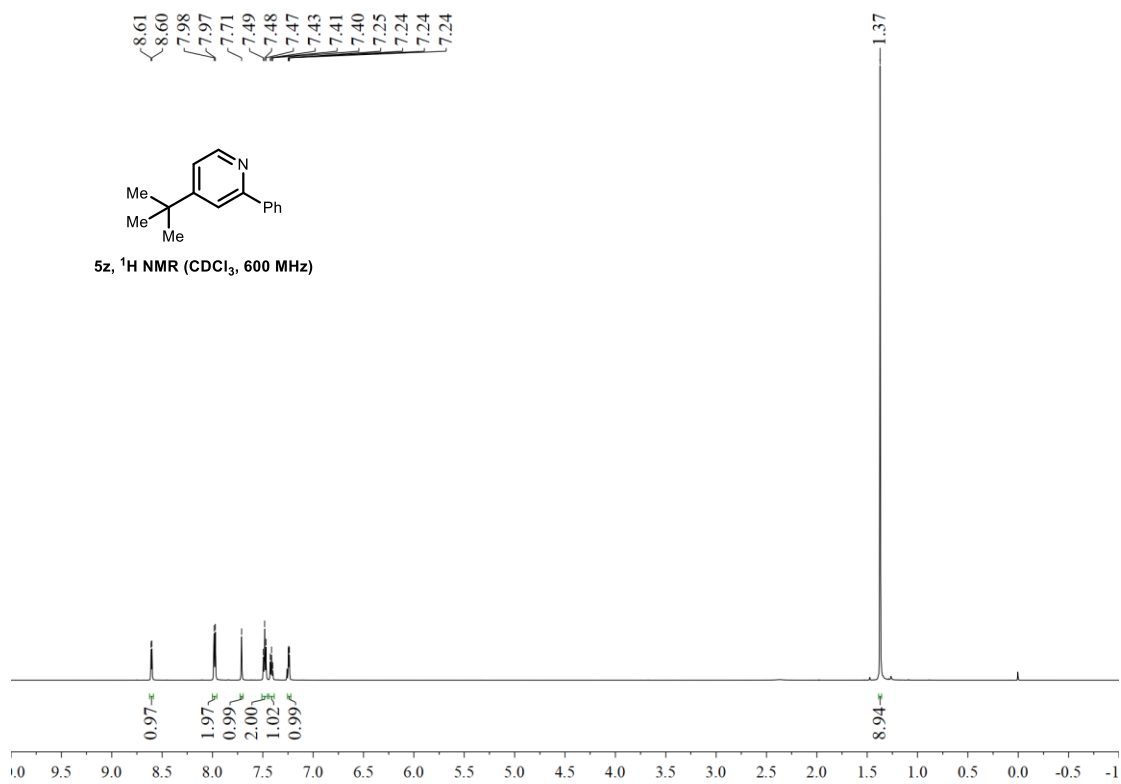

**Figure S121.**  $^1\text{H NMR}$  of **5z** ( $\text{CDCl}_3$ , 600 MHz)

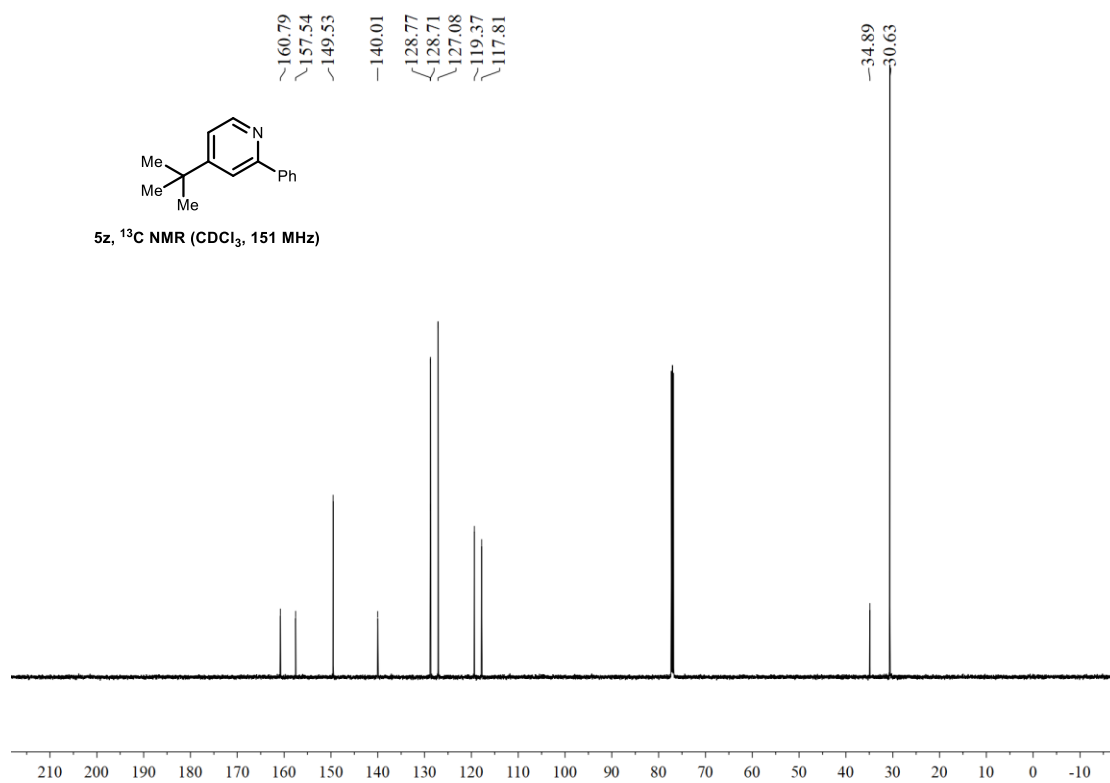

**Figure S122.**  $^{13}\text{C NMR}$  of **5z** ( $\text{CDCl}_3$ , 151 MHz)

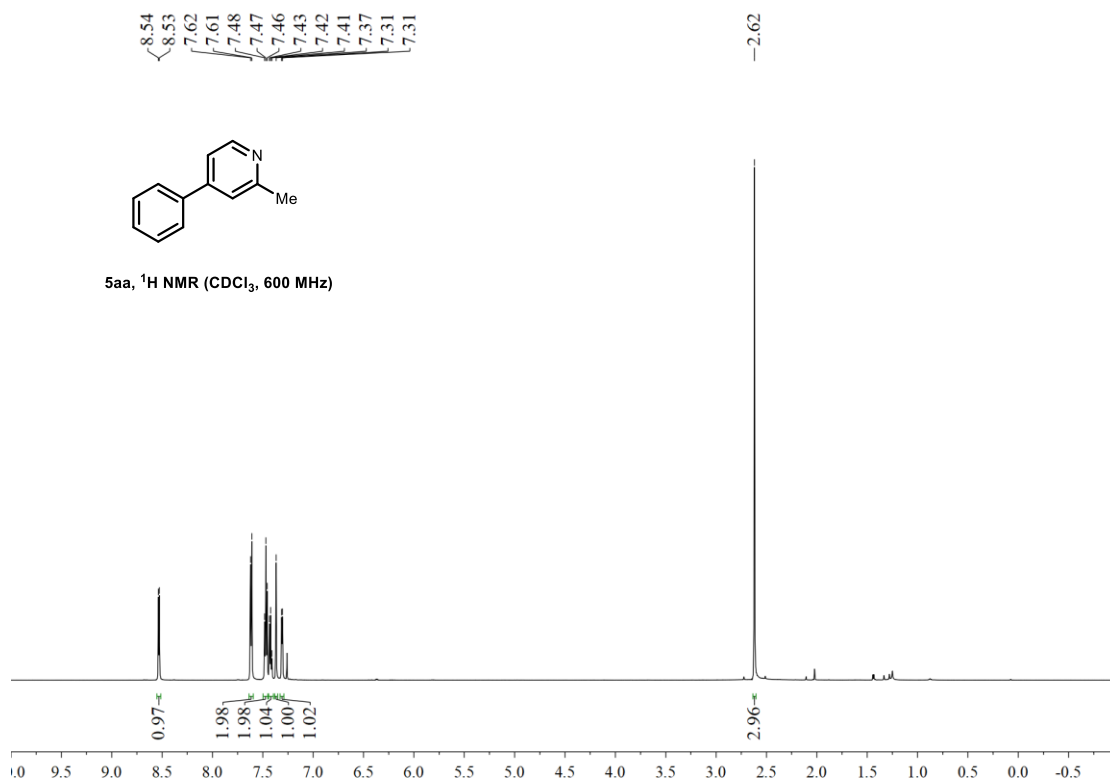

Figure S123.  $^1\text{H NMR}$  of 5aa ( $\text{CDCl}_3$ , 600 MHz)

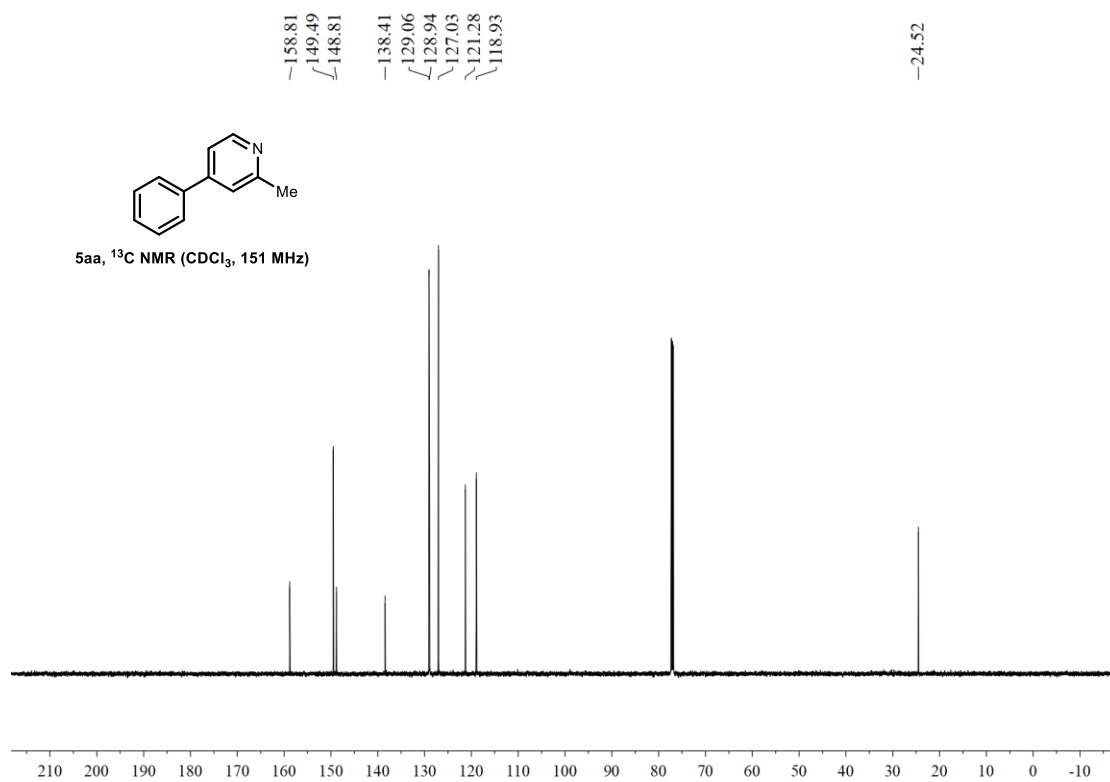

Figure S124.  $^{13}\text{C NMR}$  of 5aa ( $\text{CDCl}_3$ , 151 MHz)

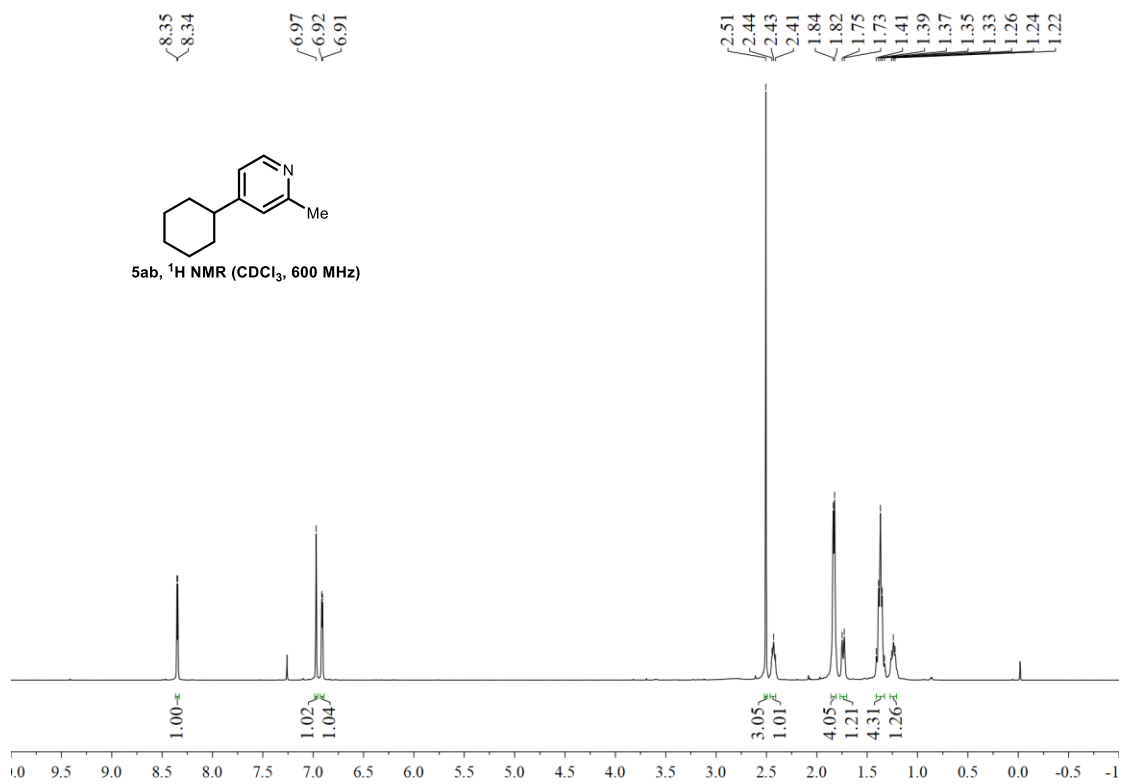

**Figure S125.  $^1\text{H}$  NMR of **5ab** ( $\text{CDCl}_3$ , 600 MHz)**

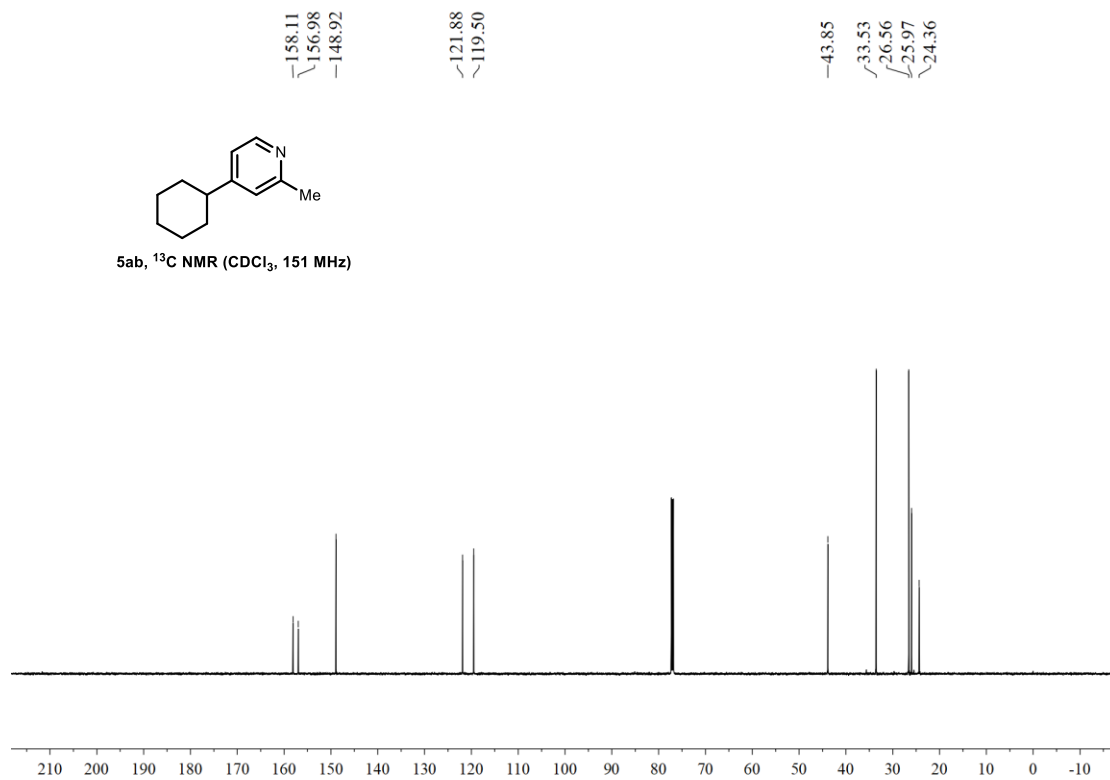

**Figure S126.  $^{13}\text{C}$  NMR of **5ab** ( $\text{CDCl}_3$ , 151 MHz)**

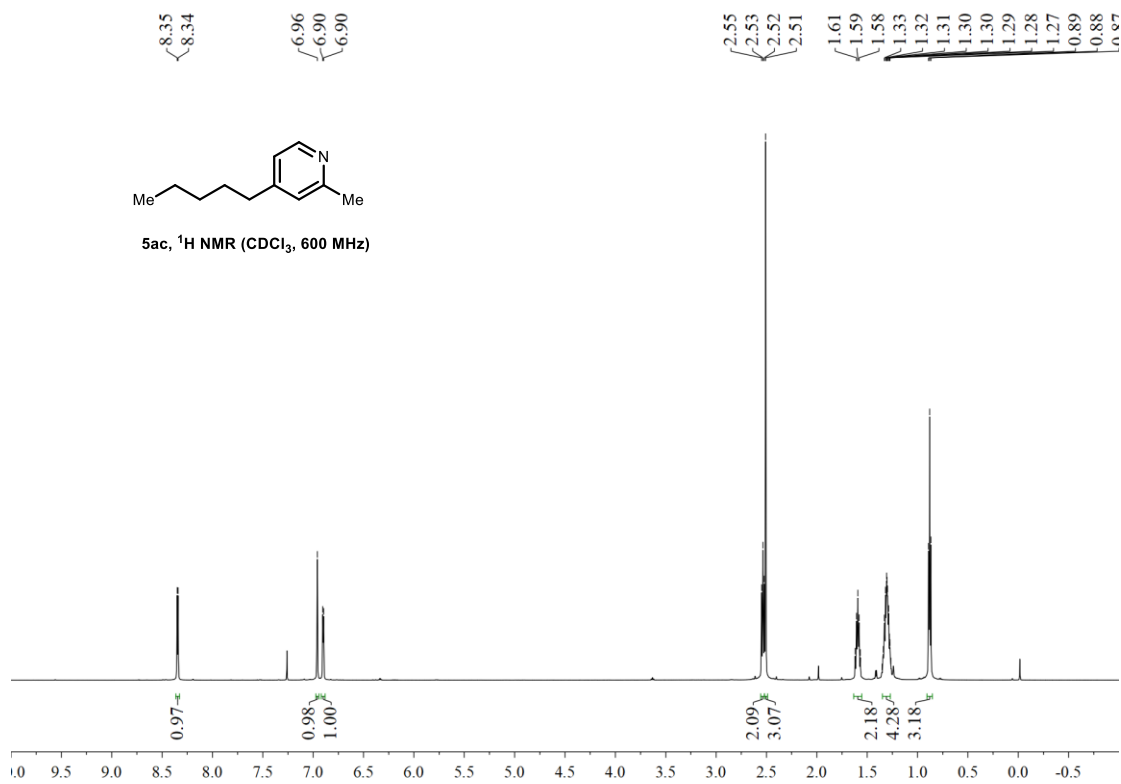

**Figure S127.  $^1\text{H NMR}$  of **5ac** ( $\text{CDCl}_3$ , 600 MHz)**

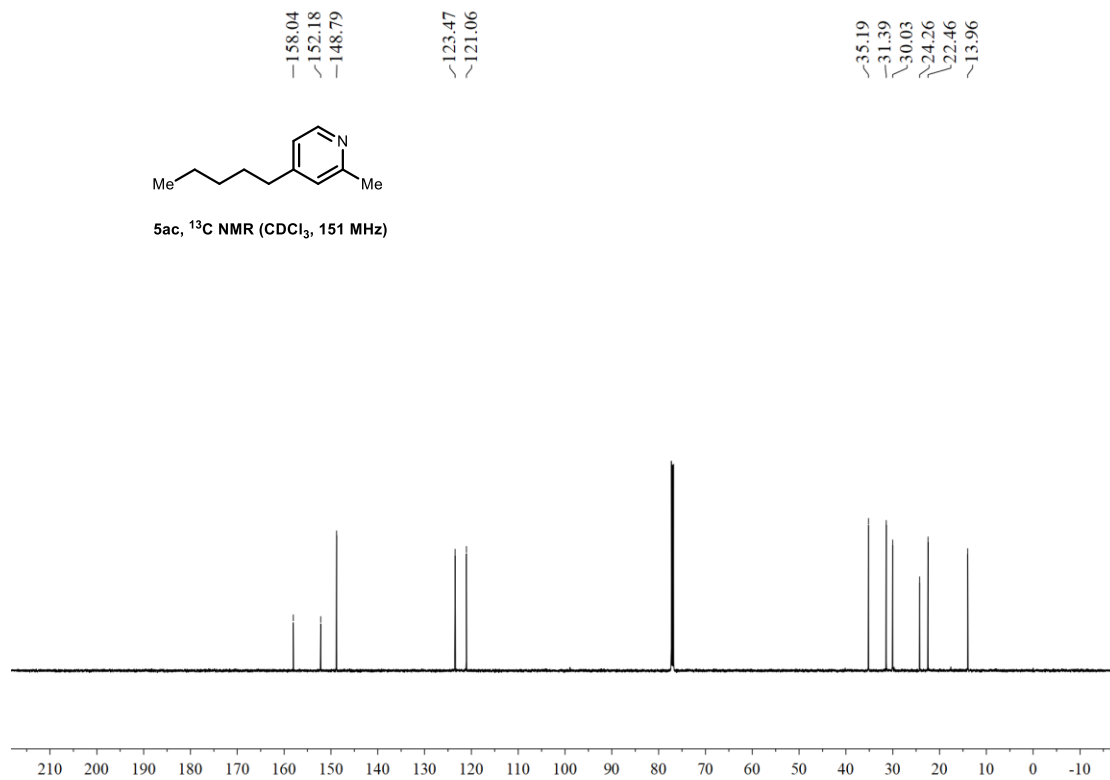

**Figure S128.  $^{13}\text{C NMR}$  of **5ac** ( $\text{CDCl}_3$ , 151 MHz)**



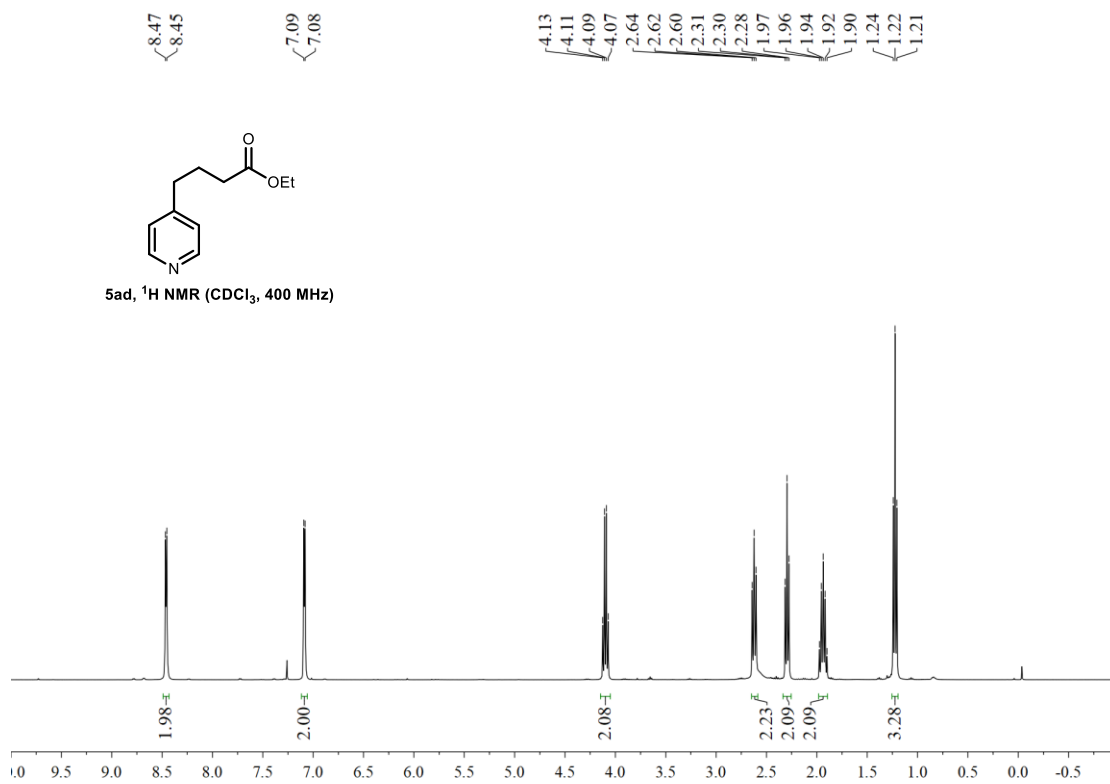

**Figure S129.**  $^1\text{H}$  NMR of **5ad** ( $\text{CDCl}_3$ , 400 MHz)

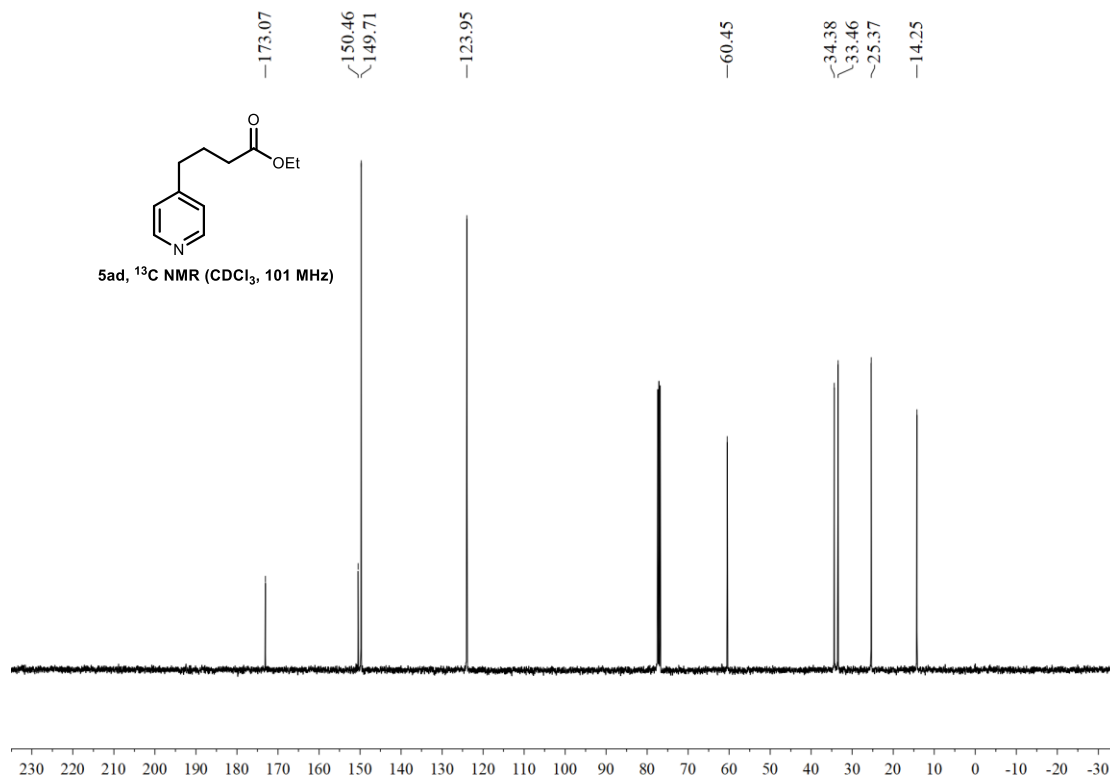

**Figure S130.**  $^{13}\text{C}$  NMR of **5ad** ( $\text{CDCl}_3$ , 101 MHz)

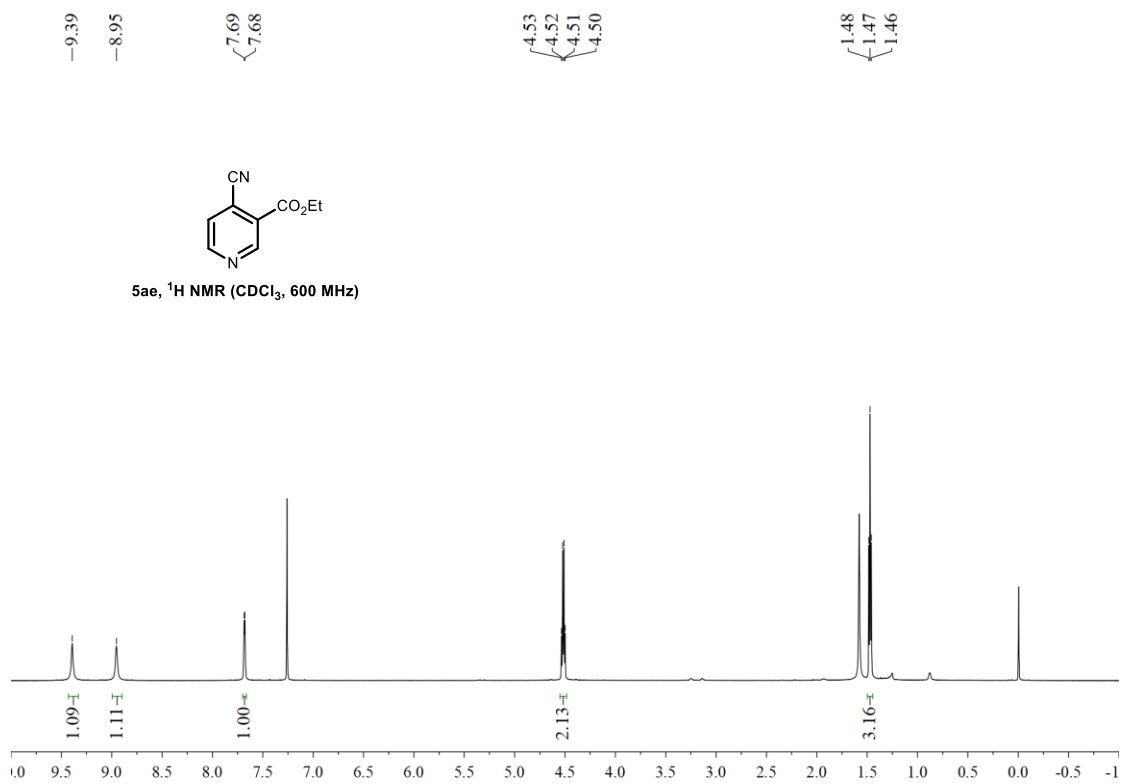

**Figure S131.  $^1\text{H}$  NMR of **5ae** ( $\text{CDCl}_3$ , 600 MHz)**

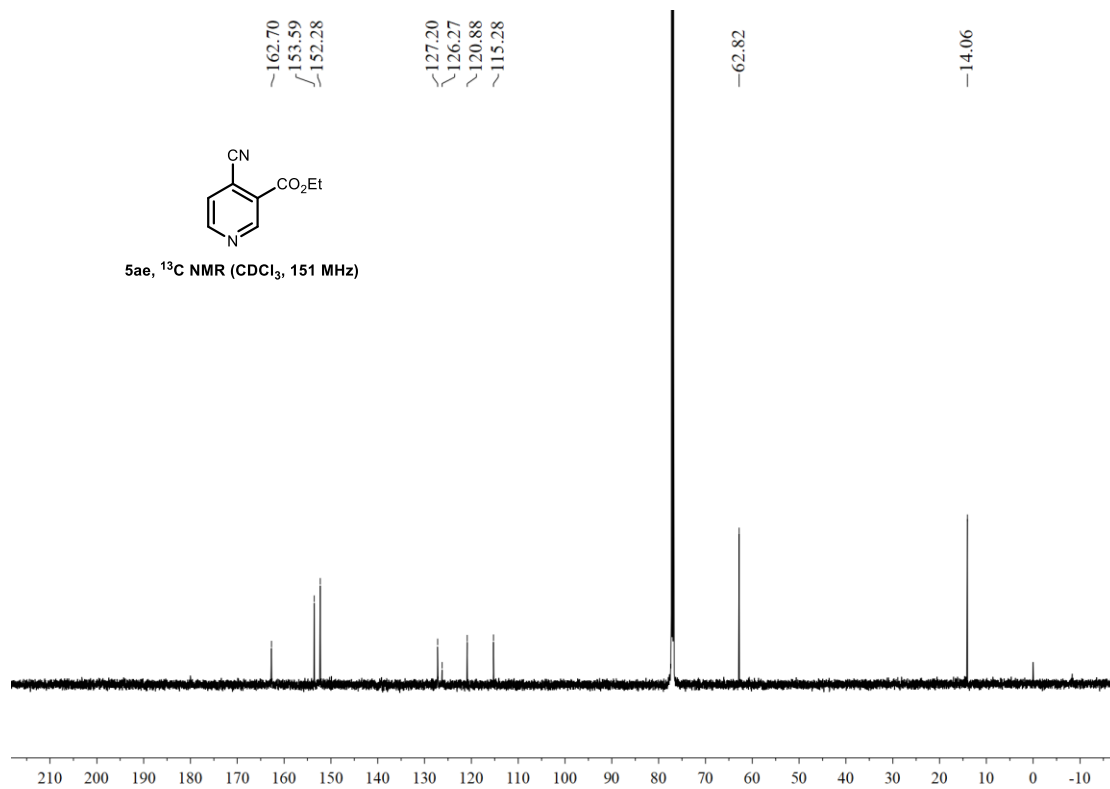

**Figure S132.  $^{13}\text{C}$  NMR of **5ae** ( $\text{CDCl}_3$ , 151 MHz)**

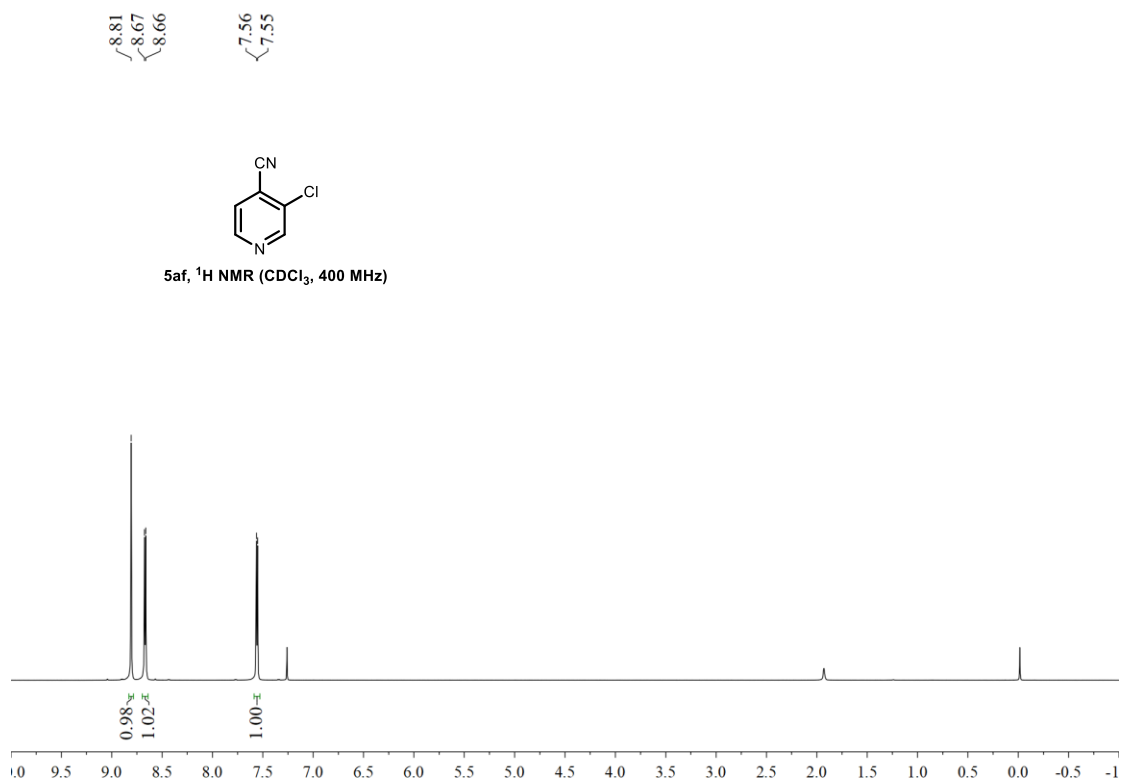

Figure S133.  $^1\text{H NMR}$  of **5af** ( $\text{CDCl}_3$ , 400 MHz)

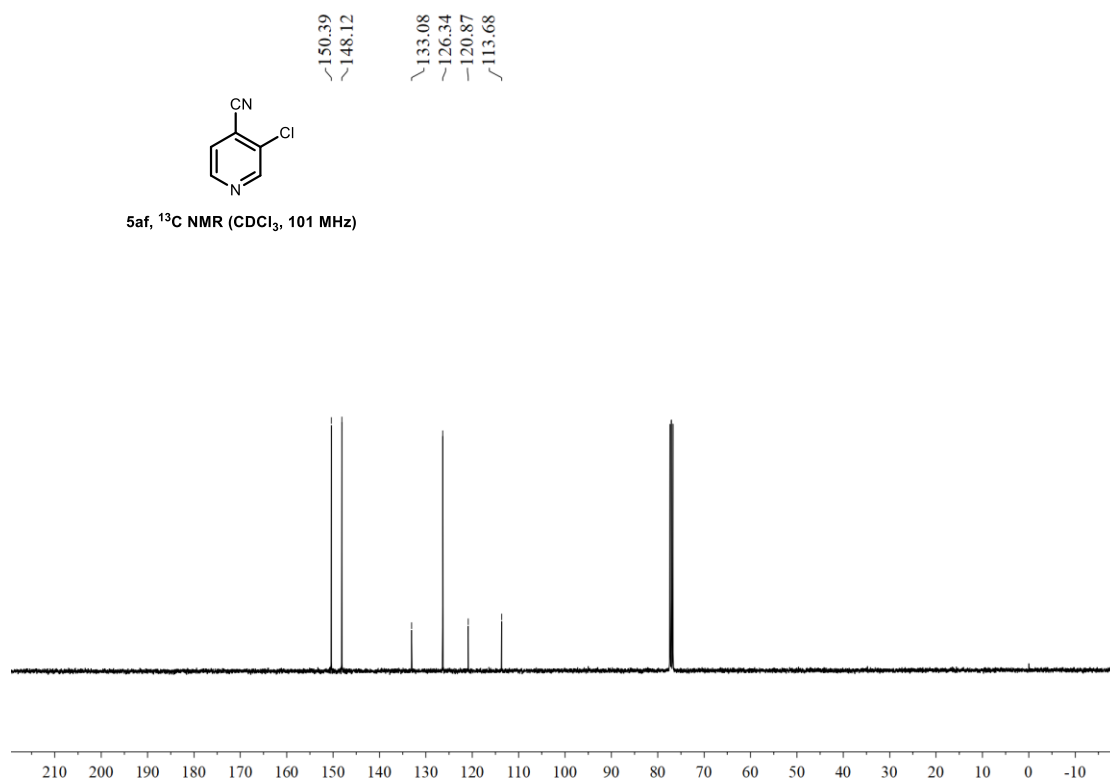

Figure S134.  $^{13}\text{C NMR}$  of **5af** ( $\text{CDCl}_3$ , 101 MHz)

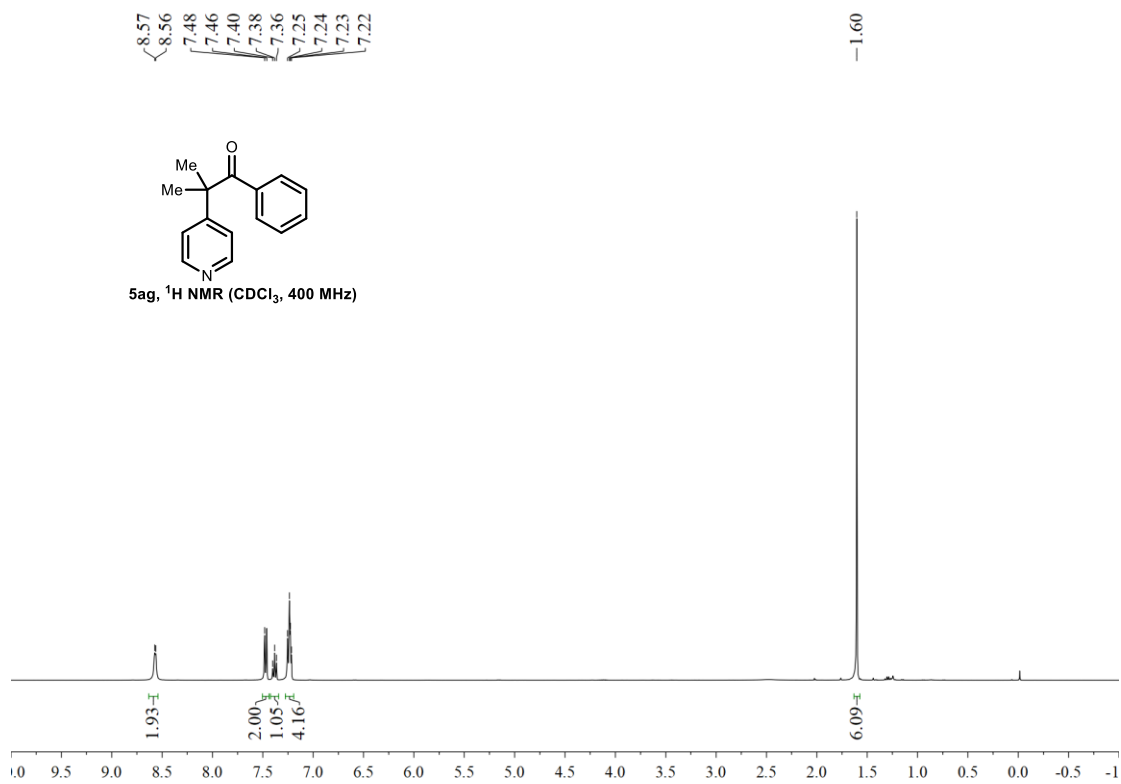

**Figure S135.  $^1\text{H}$  NMR of **5ag** ( $\text{CDCl}_3$ , 400 MHz)**

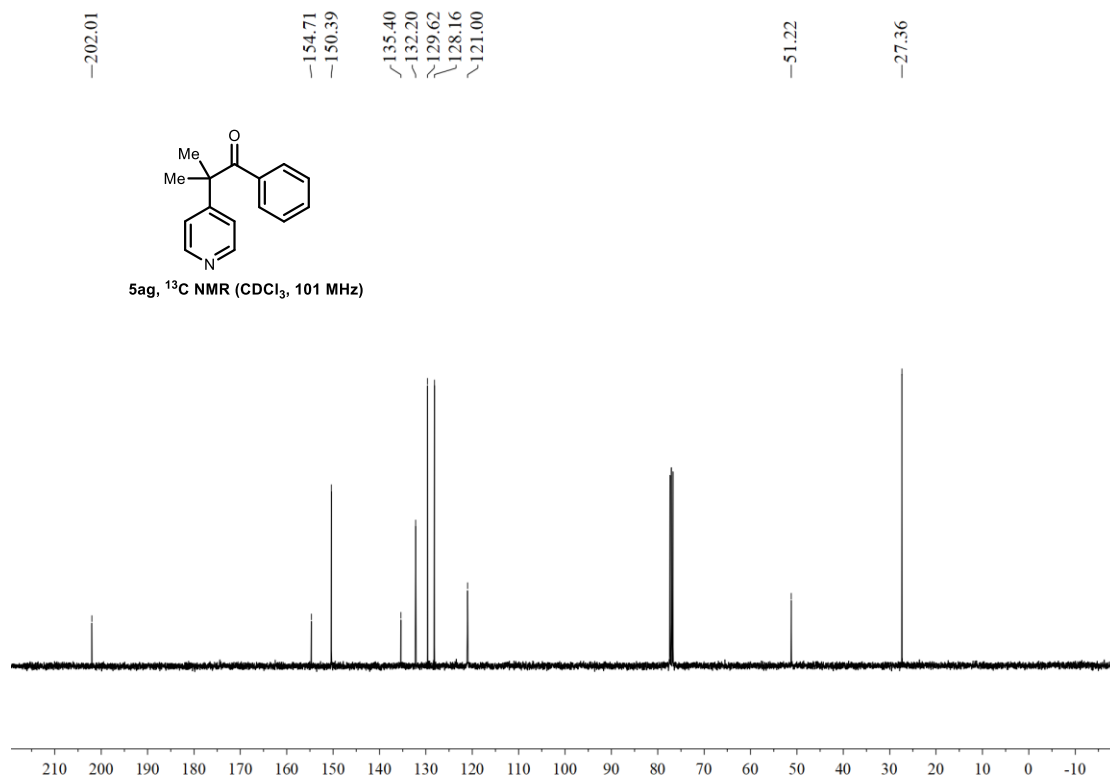

**Figure S136.  $^{13}\text{C}$  NMR of **5ag** ( $\text{CDCl}_3$ , 101 MHz)**

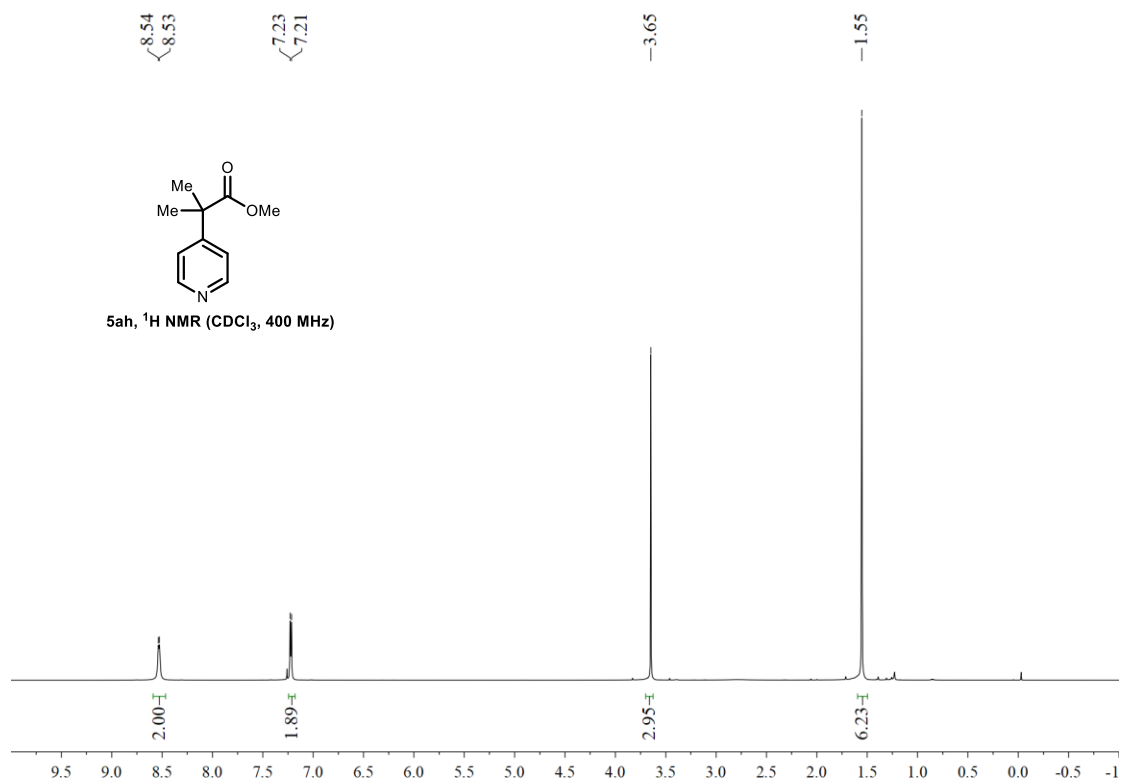

**Figure S137.**  $^1\text{H}$  NMR of **5ah** ( $\text{CDCl}_3$ , 400 MHz)

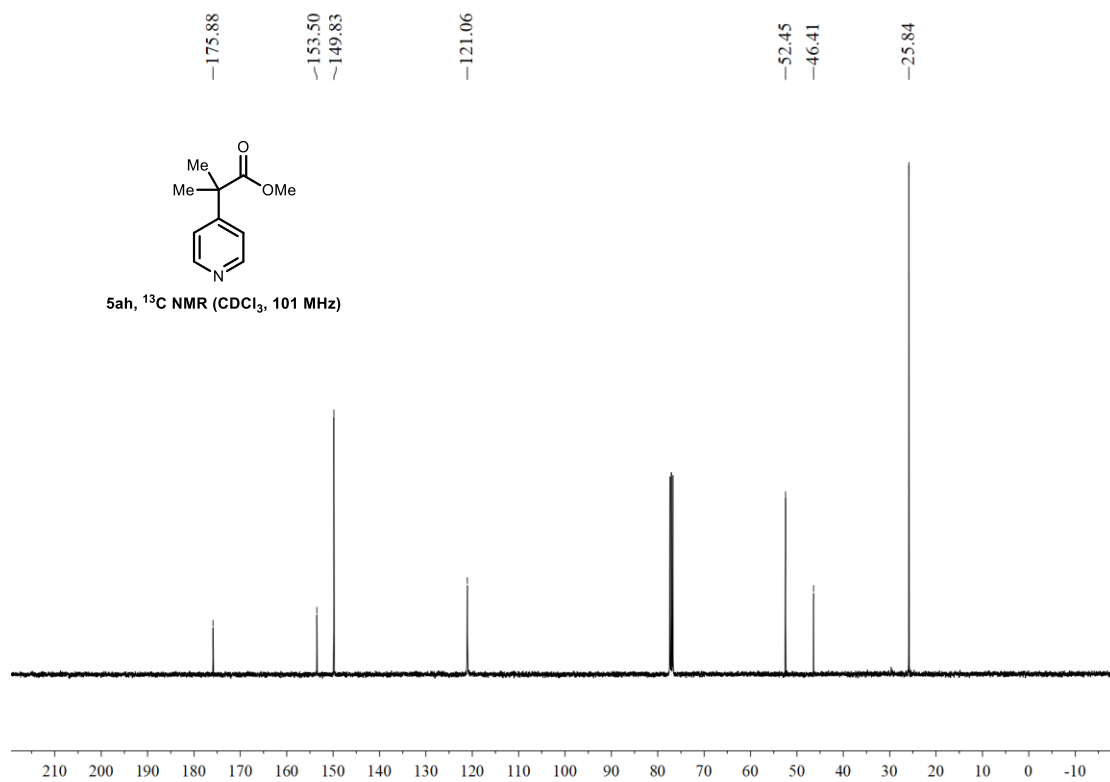

**Figure S138.**  $^{13}\text{C}$  NMR of **5ah** ( $\text{CDCl}_3$ , 101 MHz)

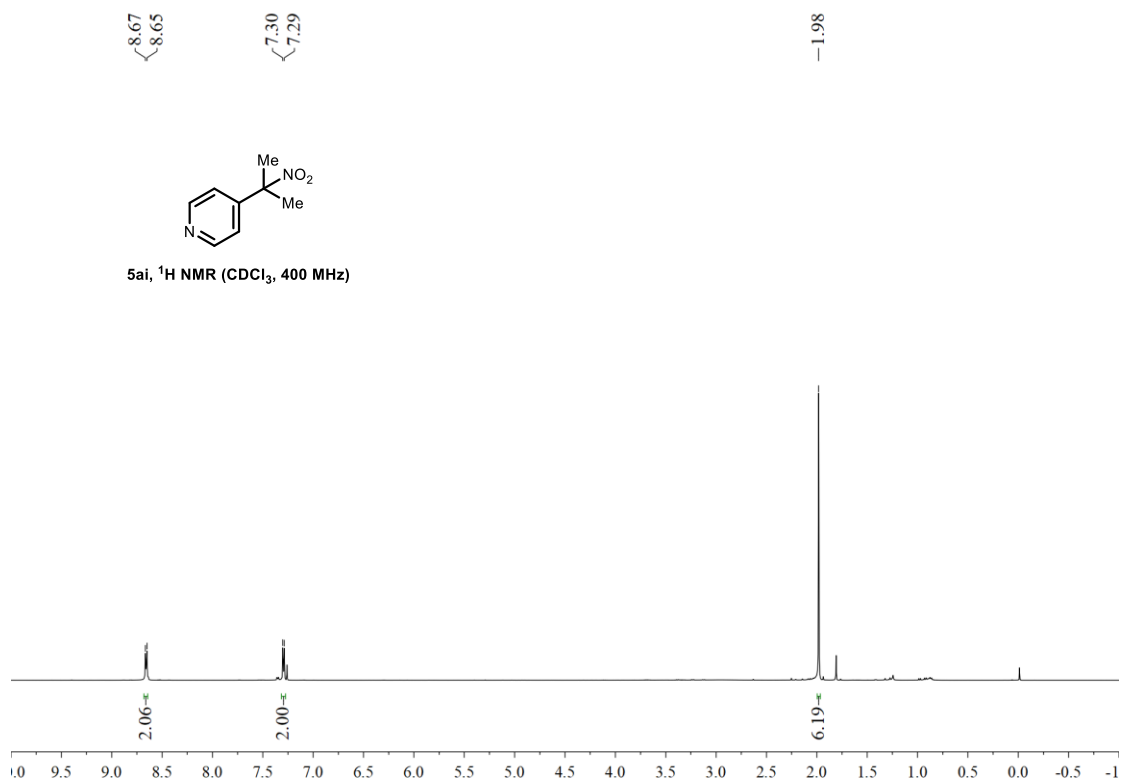

**Figure S139.**  $^1\text{H NMR}$  of **5ai** ( $\text{CDCl}_3$ , 400 MHz)

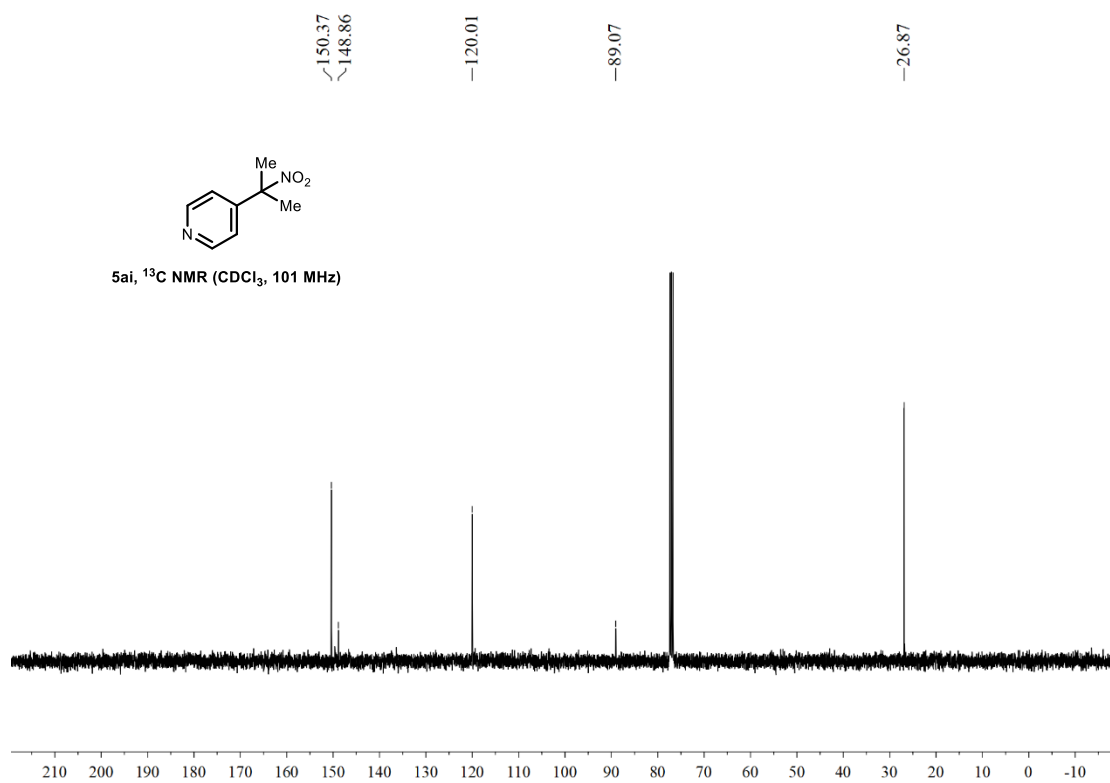

**Figure S140.**  $^{13}\text{C NMR}$  of **5ai** ( $\text{CDCl}_3$ , 101 MHz)

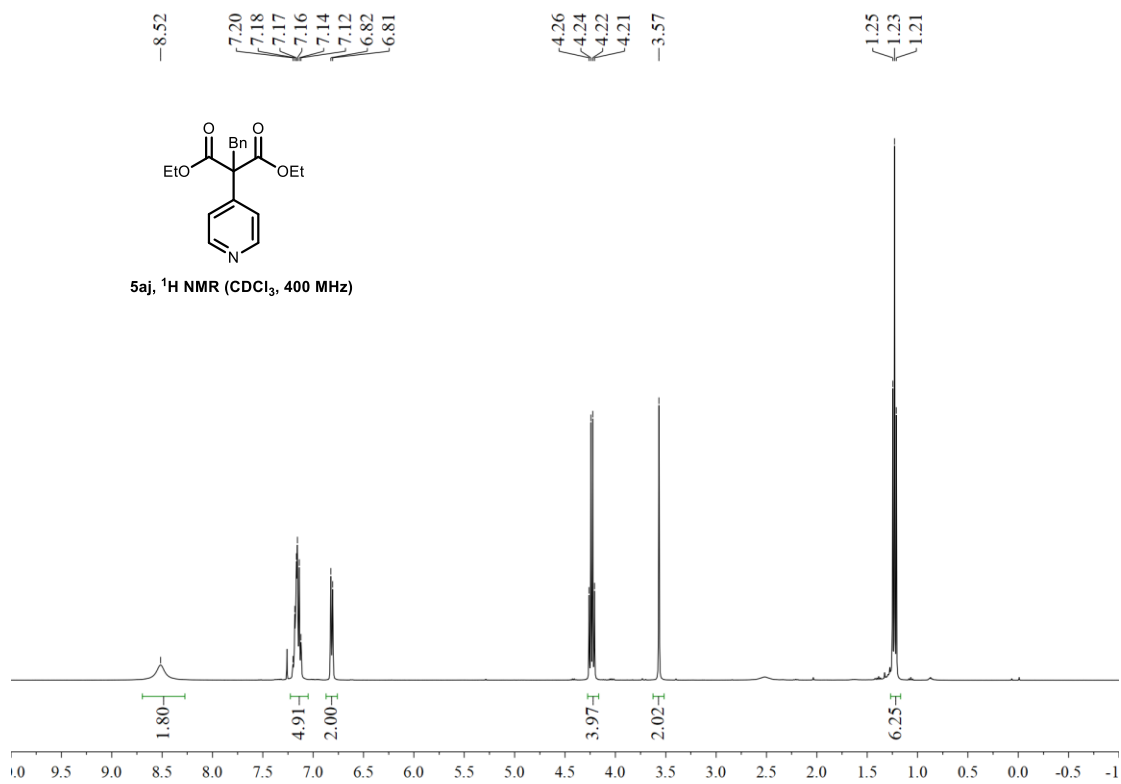

**Figure S141.**  $^1\text{H}$  NMR of **5aj** ( $\text{CDCl}_3$ , 400 MHz)

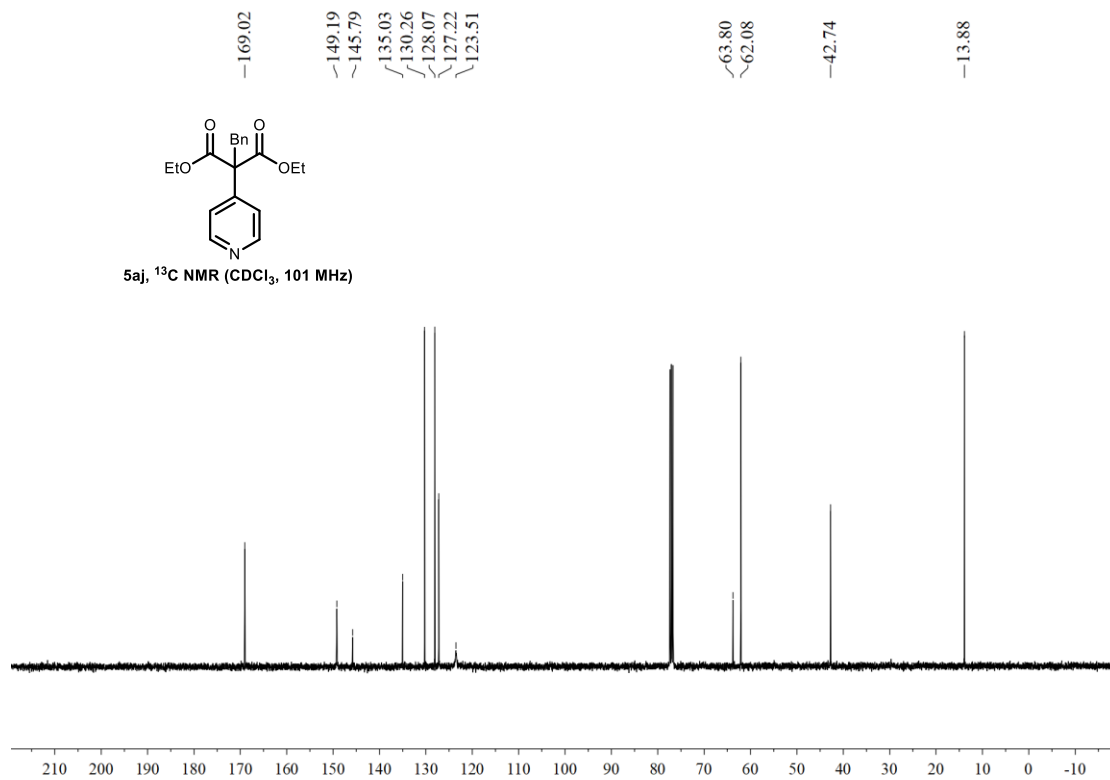

**Figure S142.**  $^{13}\text{C}$  NMR of **5aj** ( $\text{CDCl}_3$ , 101 MHz)

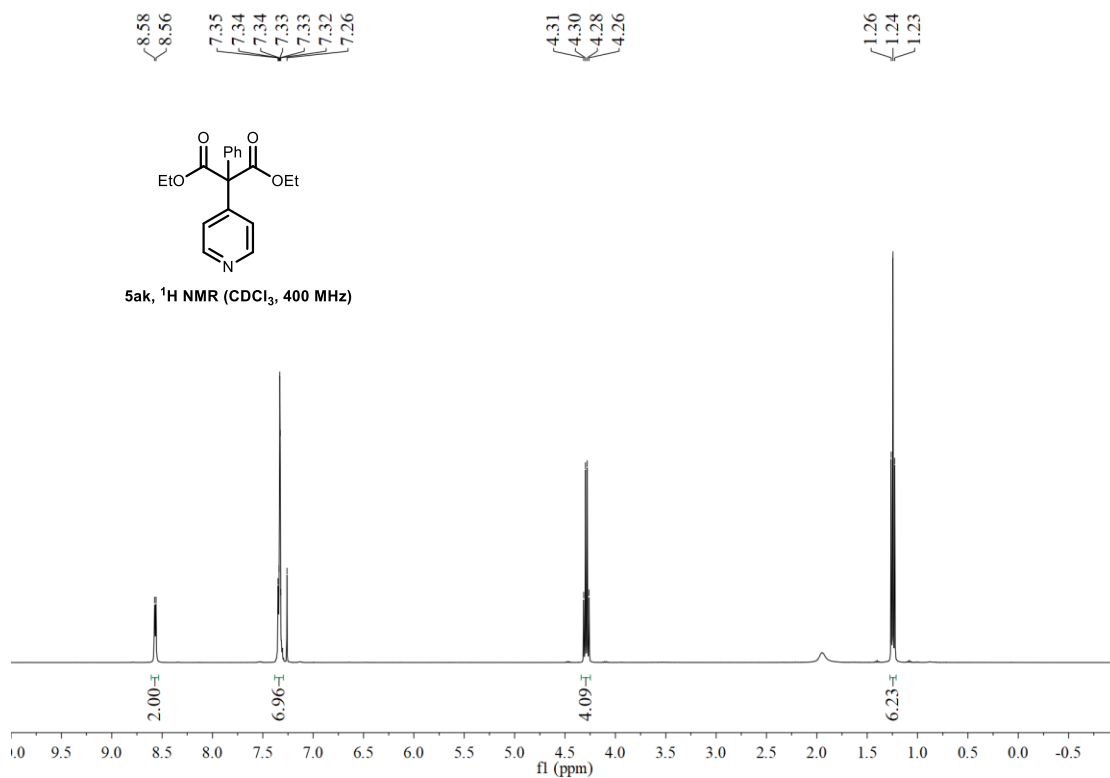

Figure S143.  $^1\text{H NMR}$  of 5ak ( $\text{CDCl}_3$ , 400 MHz)

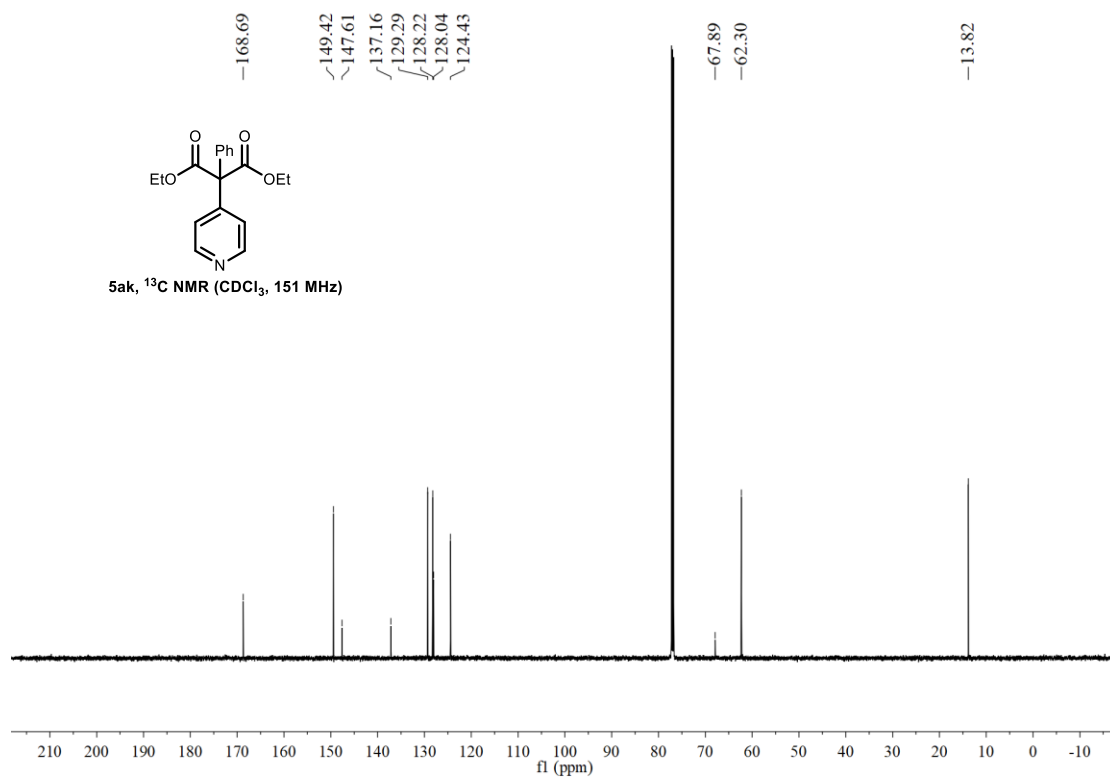

Figure S144.  $^{13}\text{C NMR}$  of 5ak ( $\text{CDCl}_3$ , 151 MHz)



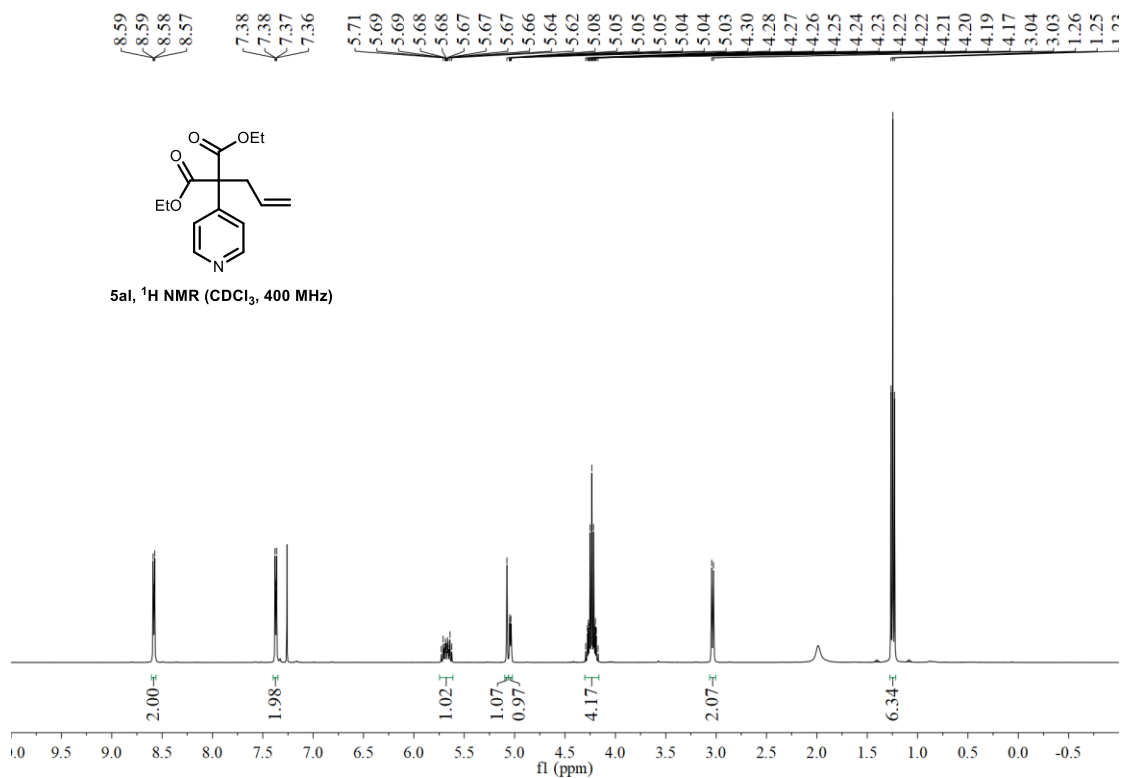

Figure S145.  $^1\text{H}$  NMR of 5al ( $\text{CDCl}_3$ , 400 MHz)

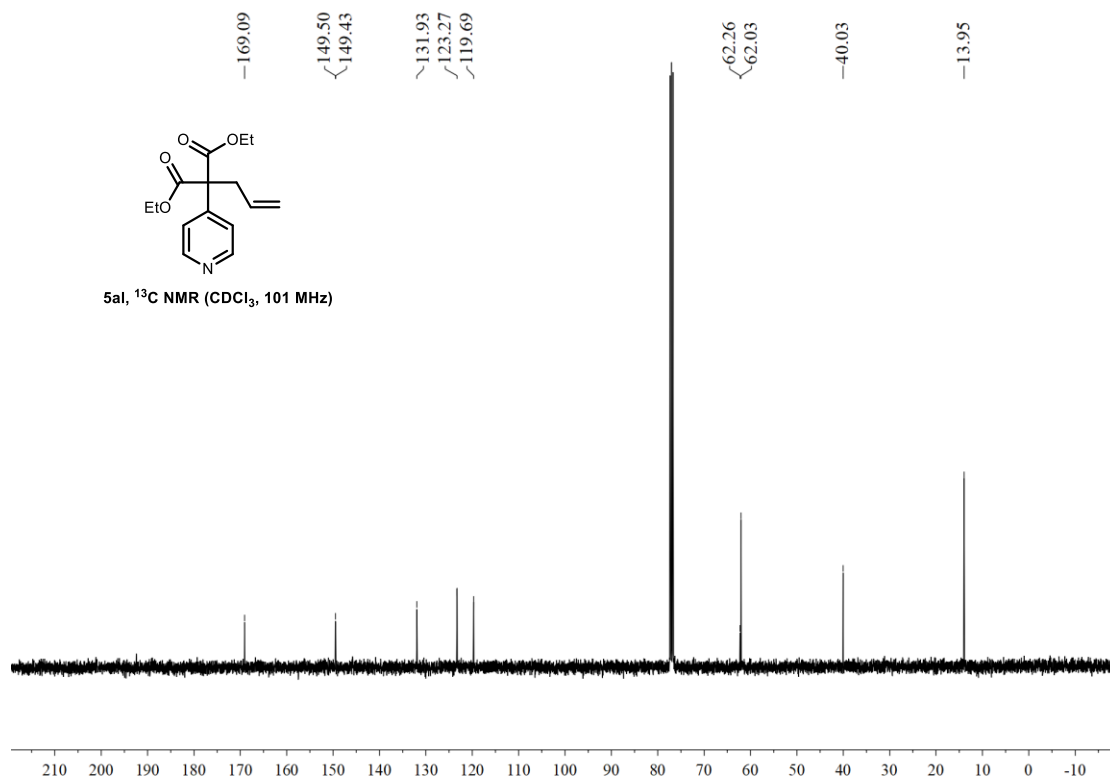

Figure S146.  $^{13}\text{C}$  NMR of 5al ( $\text{CDCl}_3$ , 101 MHz)

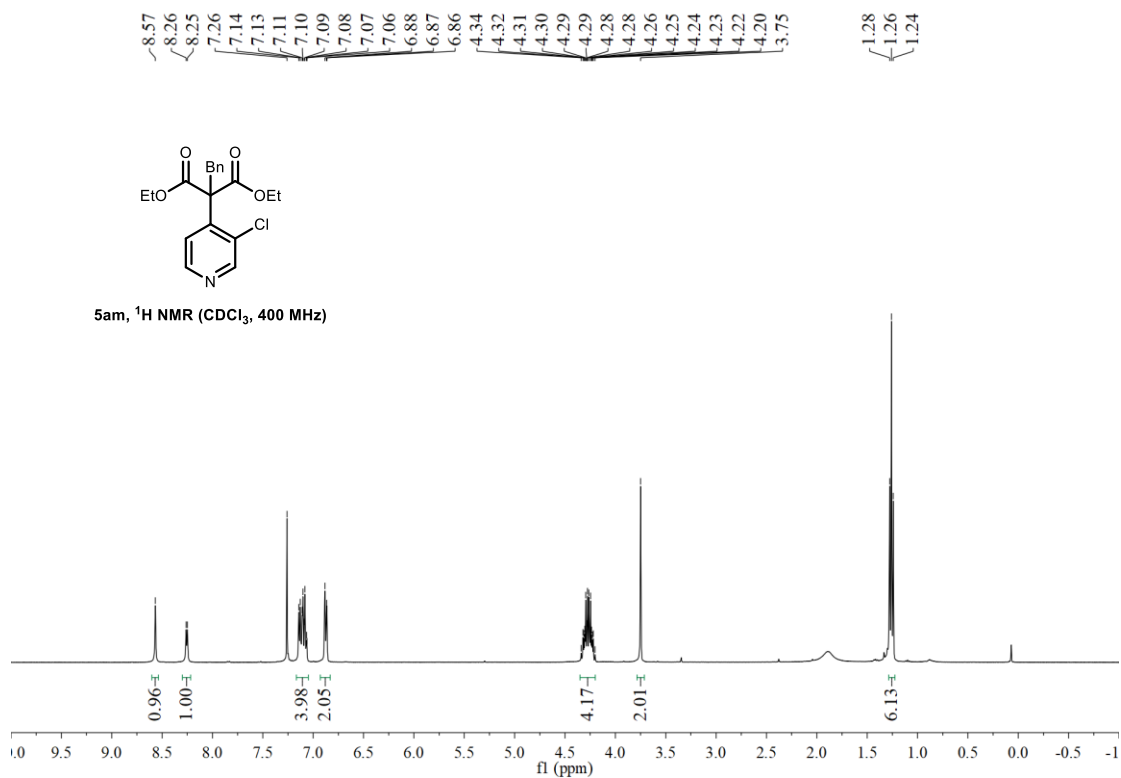

**Figure S147.  $^1\text{H}$  NMR of **5am** ( $\text{CDCl}_3$ , 400 MHz)**

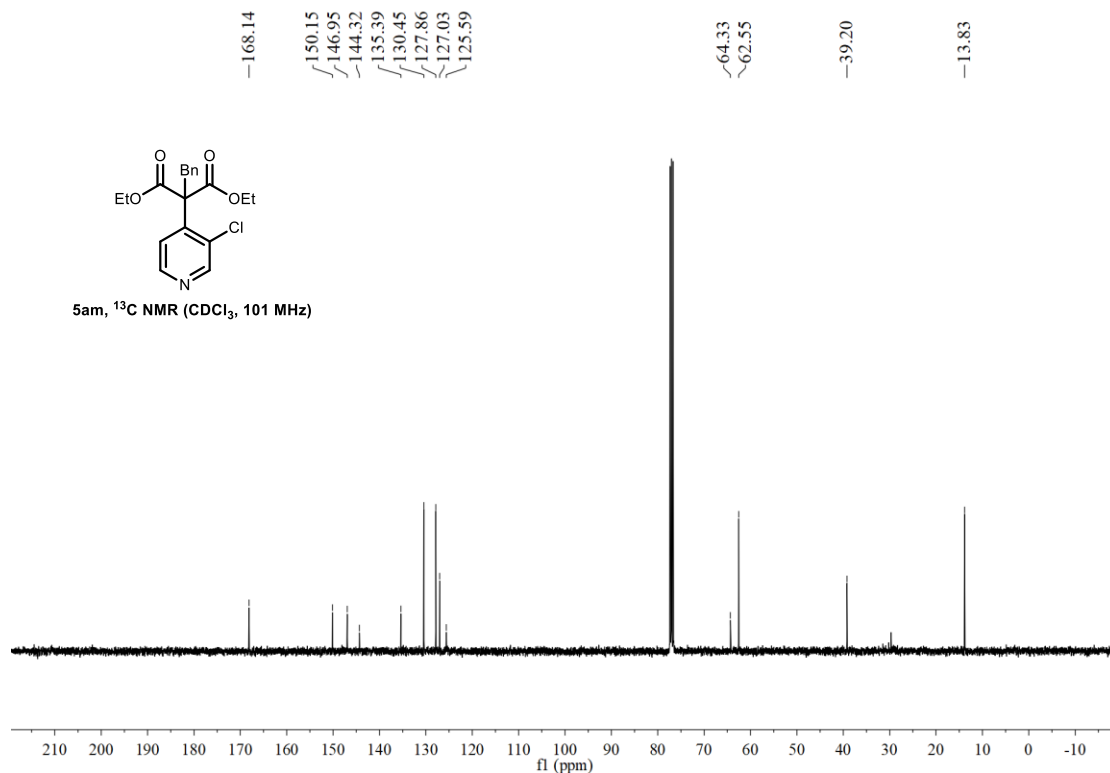

**Figure S148.  $^{13}\text{C}$  NMR of **5am** ( $\text{CDCl}_3$ , 101 MHz)**

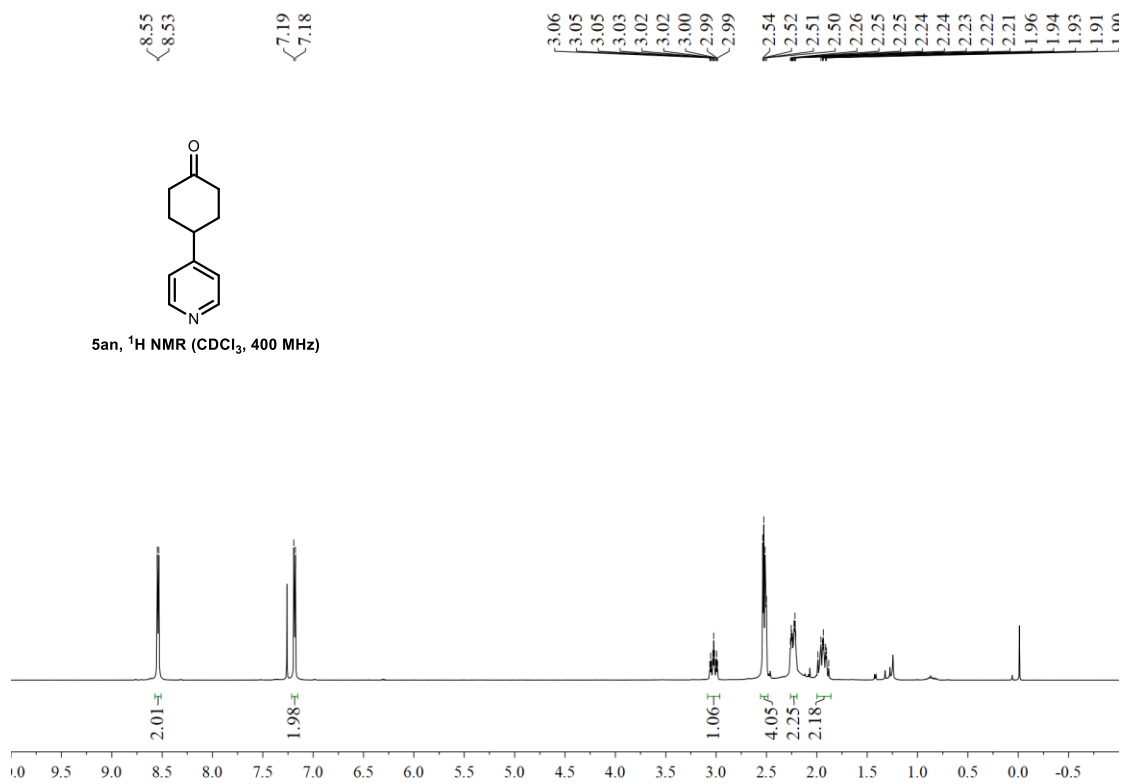

**Figure S149. <sup>1</sup>H NMR of 5an (CDCl<sub>3</sub>, 400 MHz)**

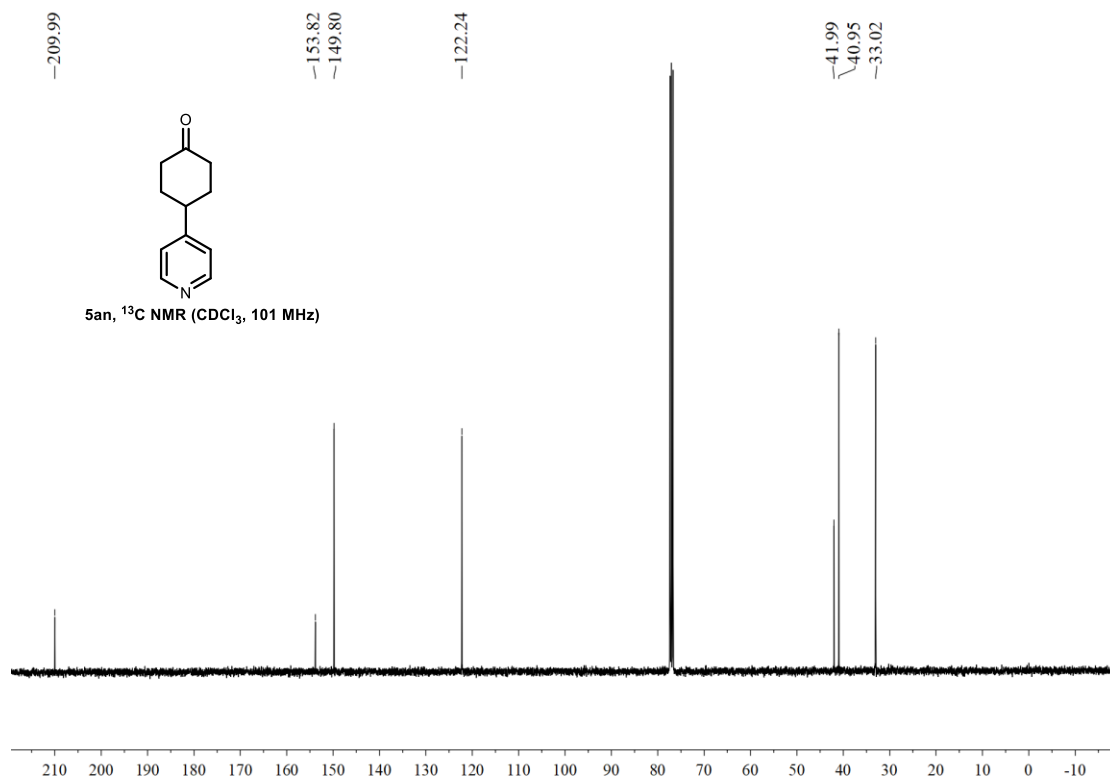

**Figure S150. <sup>13</sup>C NMR of 5an (CDCl<sub>3</sub>, 101 MHz)**

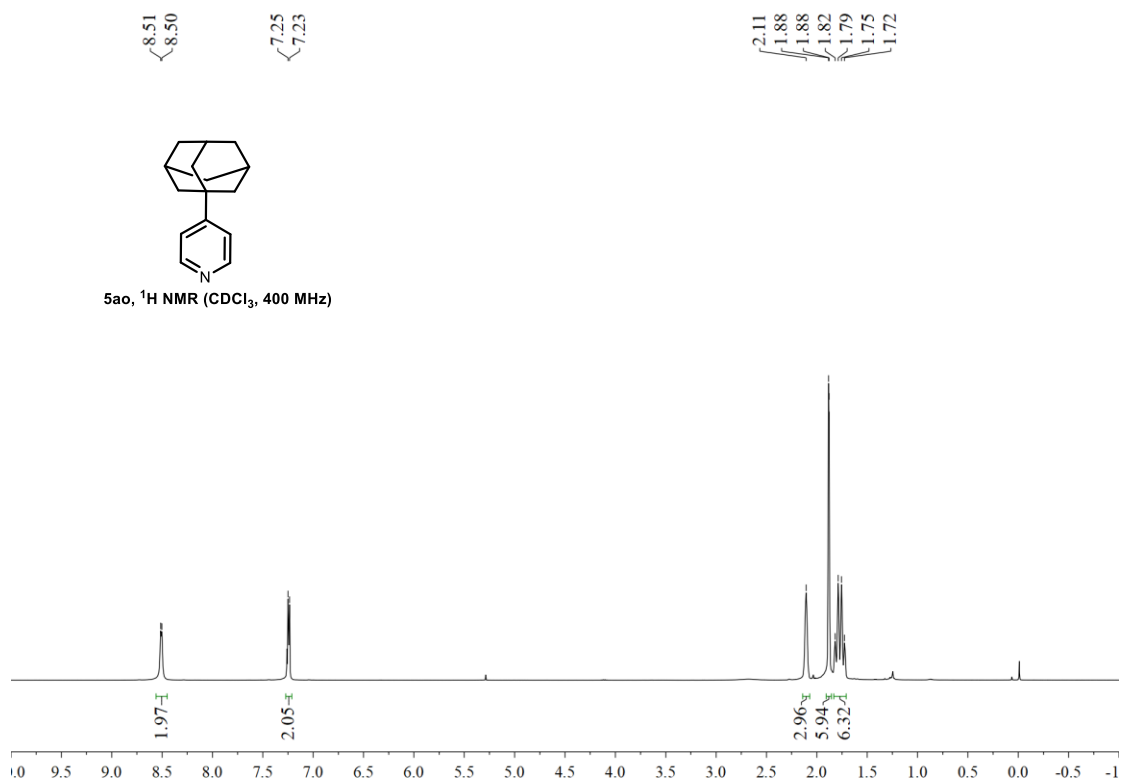

Figure S151.  $^1\text{H}$  NMR of 5ao ( $\text{CDCl}_3$ , 400 MHz)

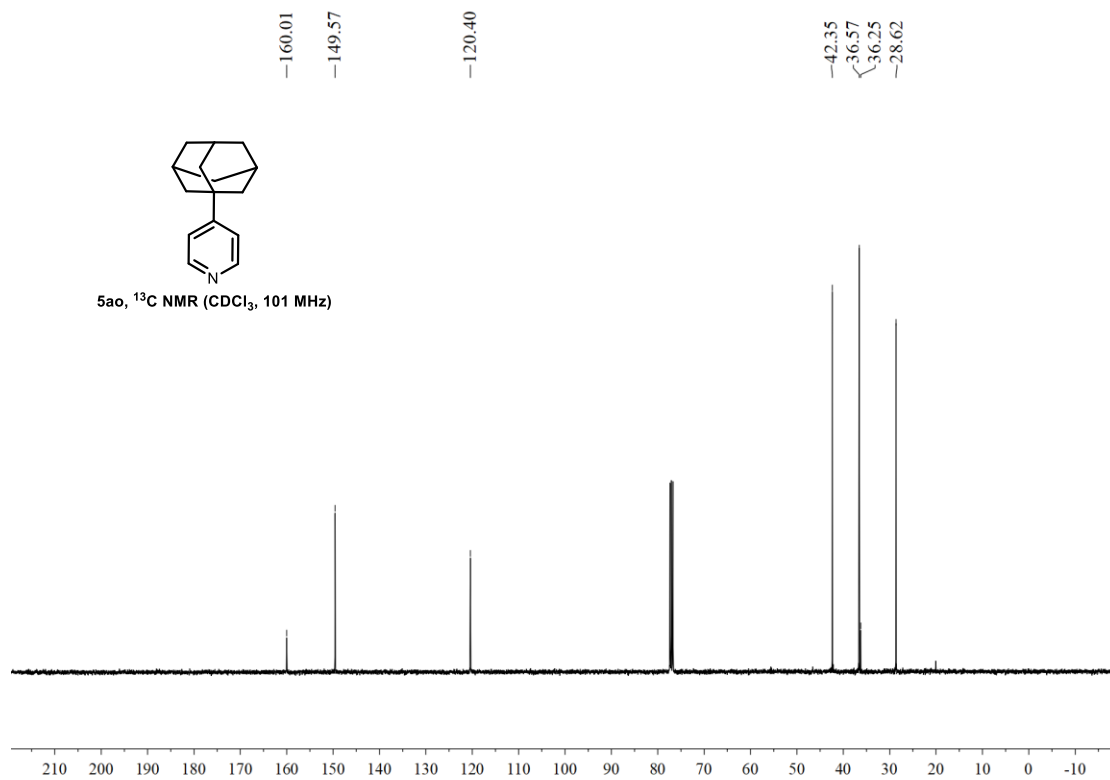

Figure S152.  $^{13}\text{C}$  NMR of 5ao ( $\text{CDCl}_3$ , 101 MHz)

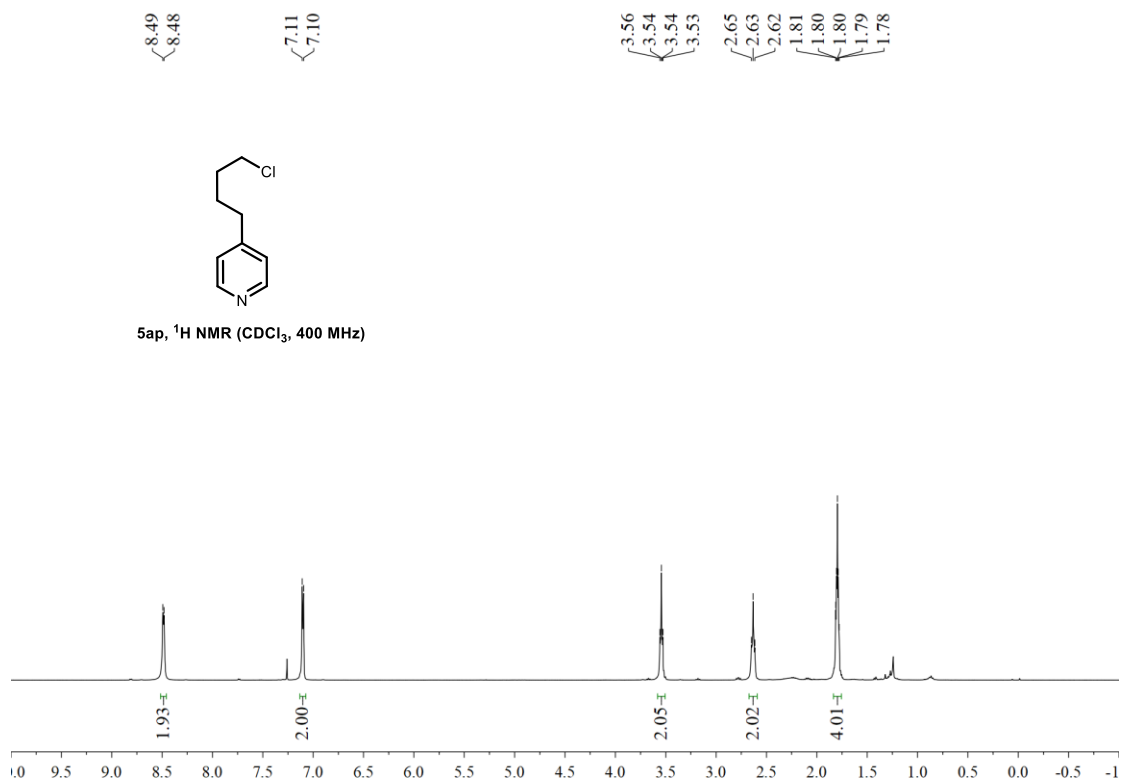

**Figure S153.  $^1\text{H NMR}$  of 5ap ( $\text{CDCl}_3$ , 400 MHz)**

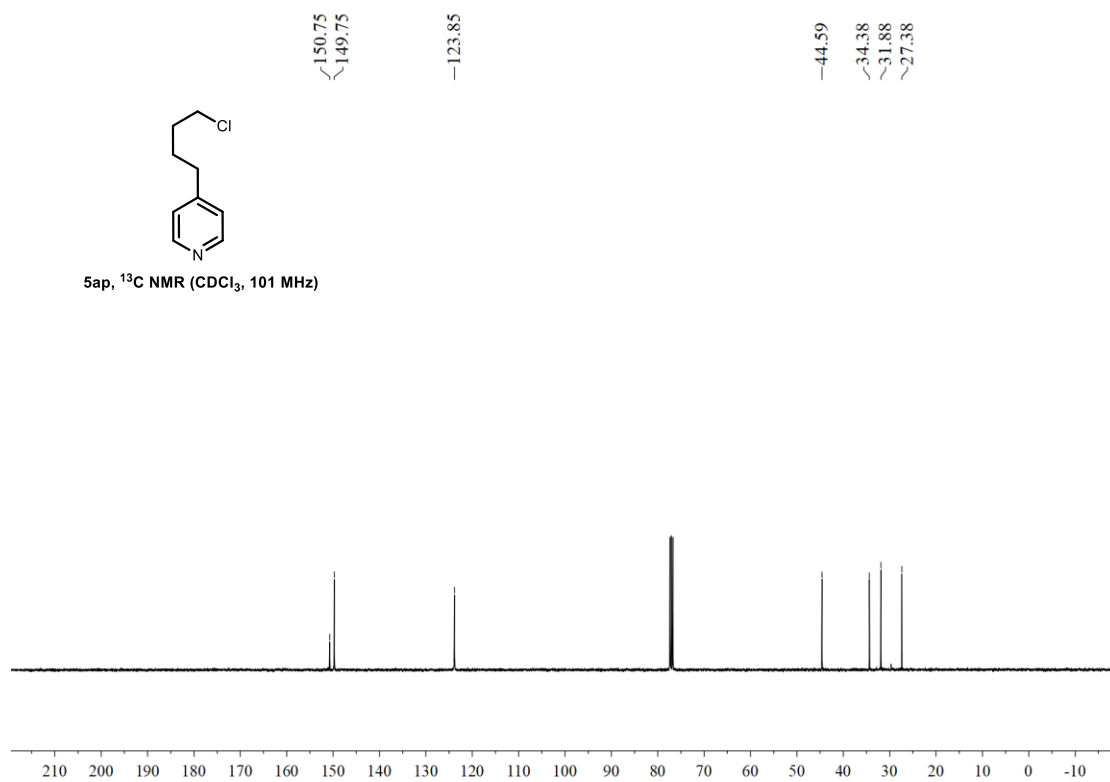

**Figure S154.  $^{13}\text{C NMR}$  of 5ap ( $\text{CDCl}_3$ , 101 MHz)**

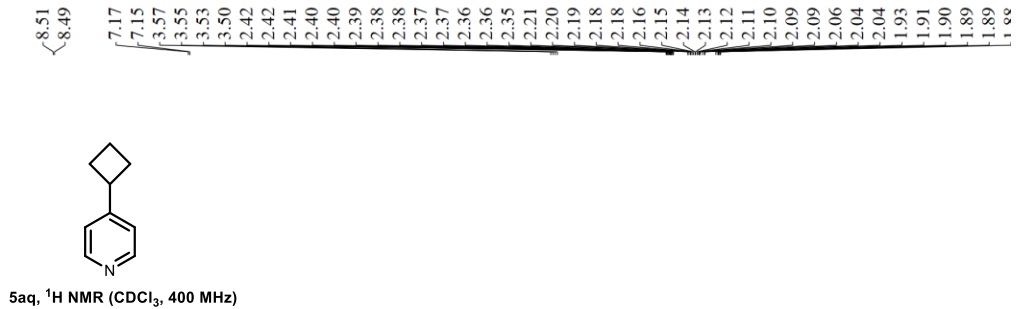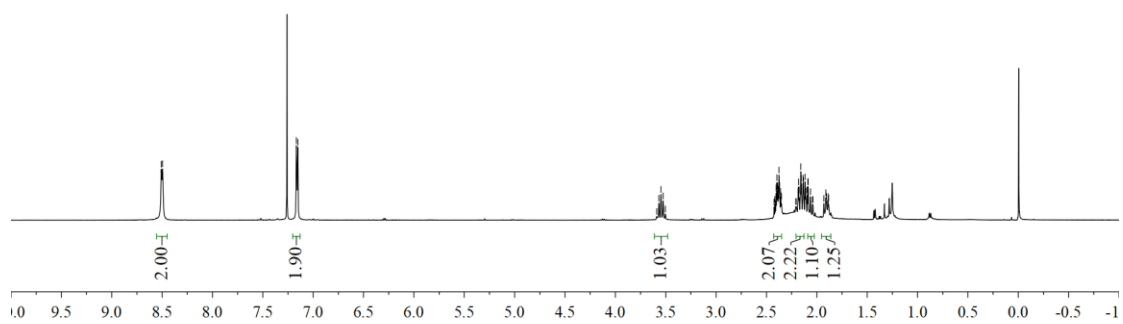

Figure S155. <sup>1</sup>H NMR of 5aq (CDCl<sub>3</sub>, 400 MHz)

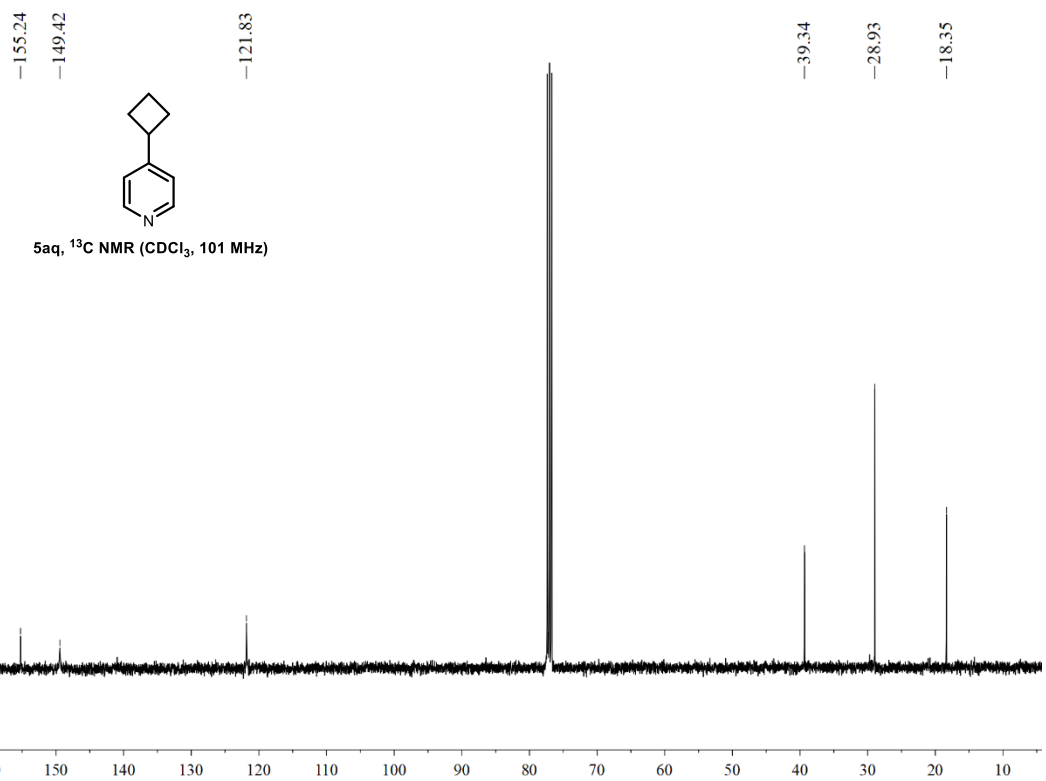

Figure S156. <sup>13</sup>C NMR of 5aq (CDCl<sub>3</sub>, 101 MHz)

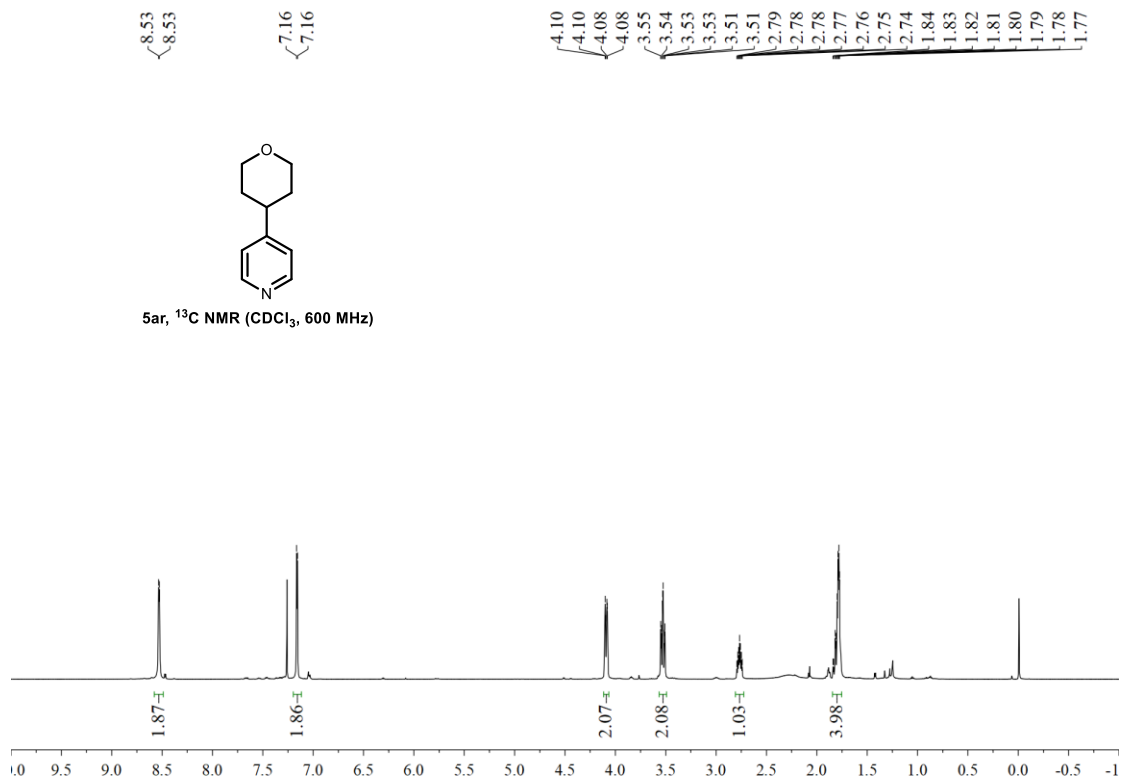

**Figure S157.**  $^1\text{H}$  NMR of **5ar** ( $\text{CDCl}_3$ , 600 MHz)

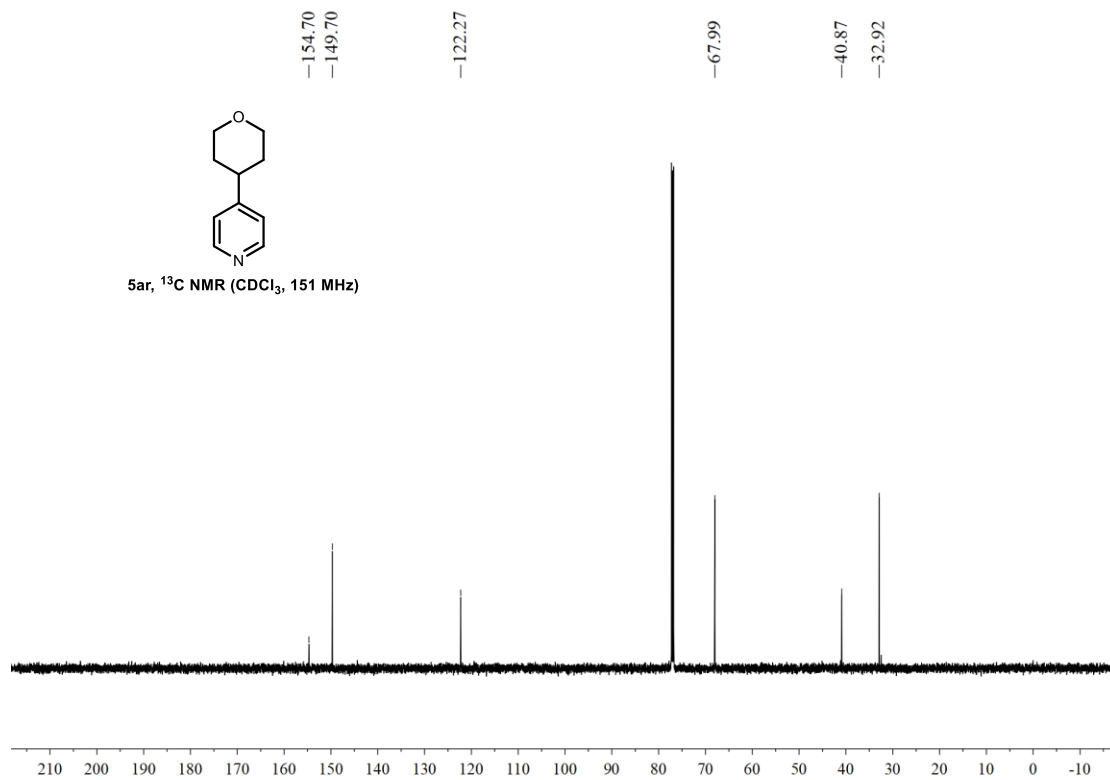

**Figure S158.**  $^{13}\text{C}$  NMR of **5ar** ( $\text{CDCl}_3$ , 151 MHz)

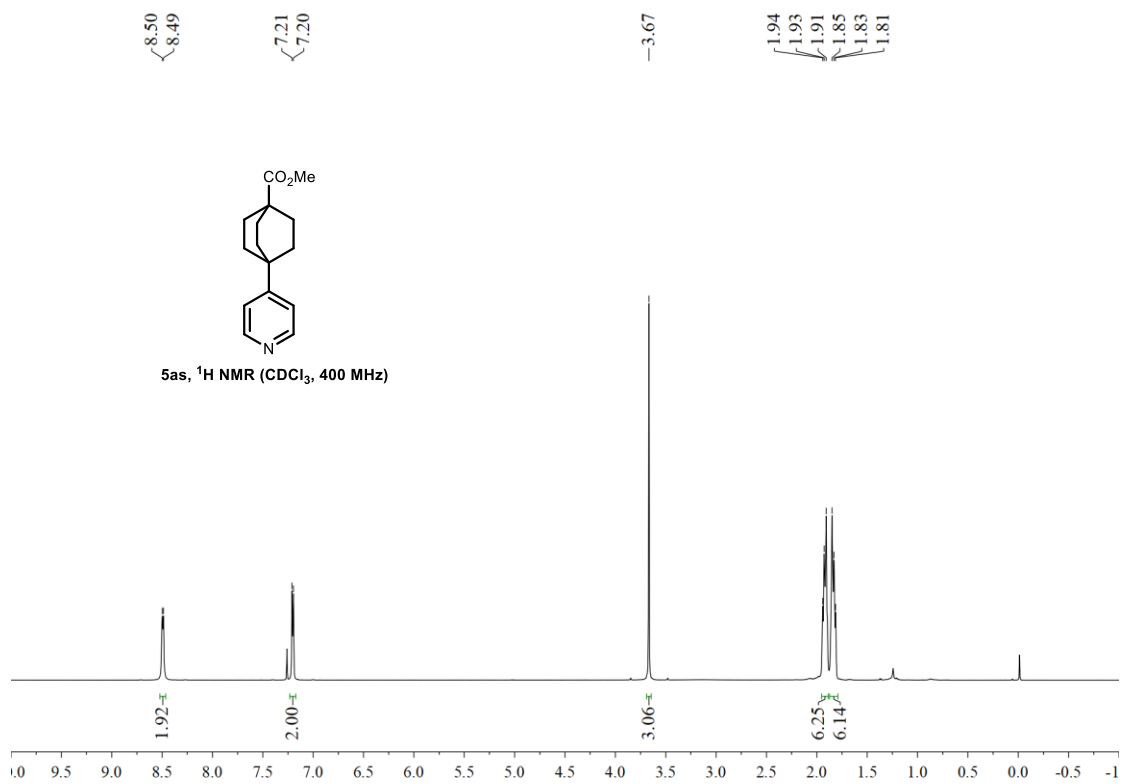

**Figure S159.**  $^1\text{H NMR}$  of **5as** ( $\text{CDCl}_3$ , 400 MHz)

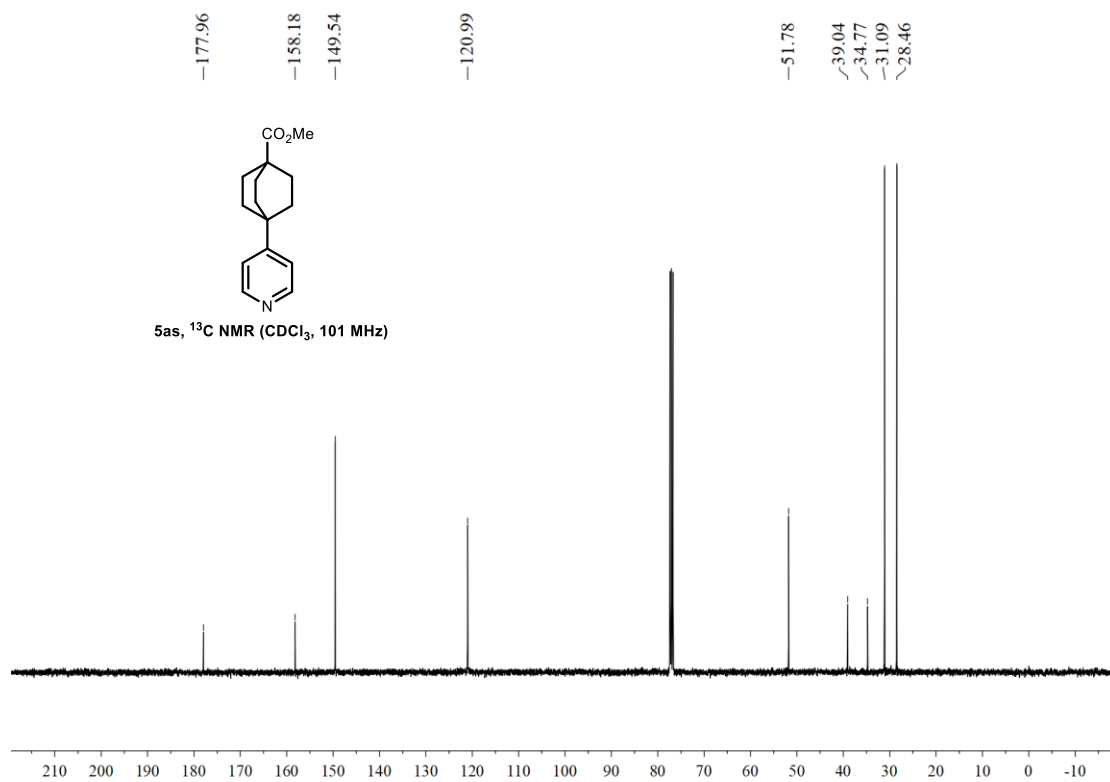

**Figure S160.**  $^{13}\text{C NMR}$  of **5as** ( $\text{CDCl}_3$ , 101 MHz)



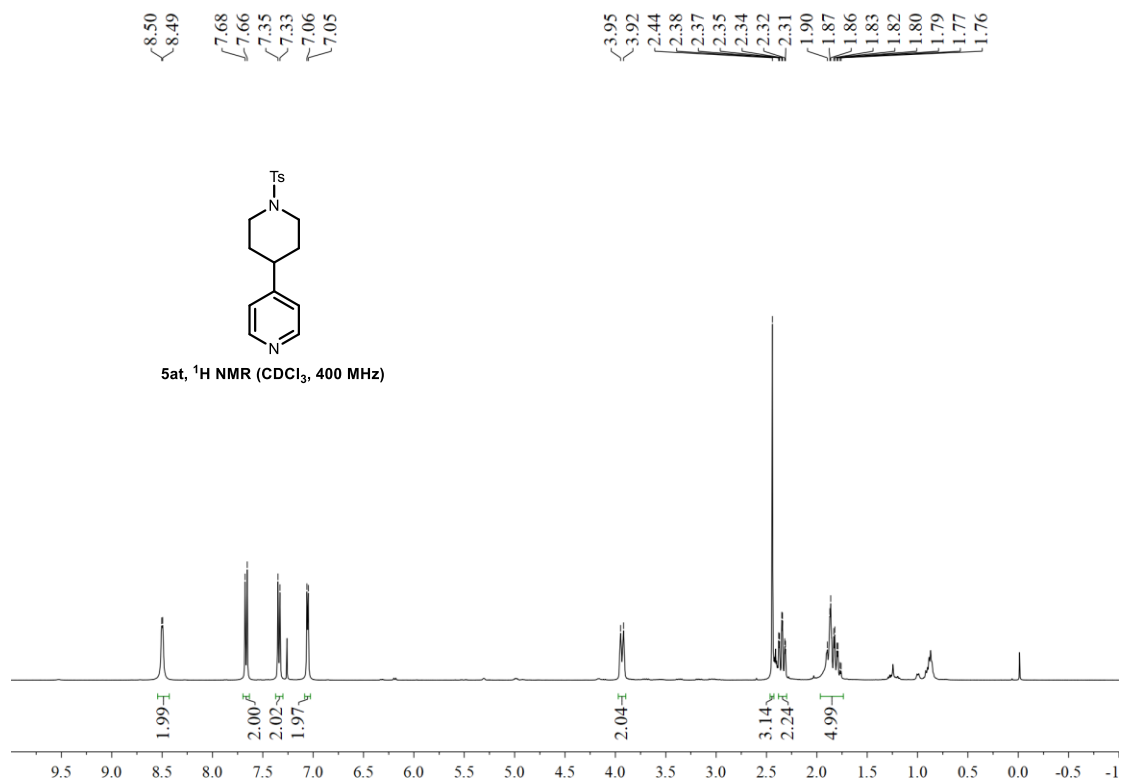

Figure S161.  $^1\text{H NMR}$  of **5at** ( $\text{CDCl}_3$ , 400 MHz)

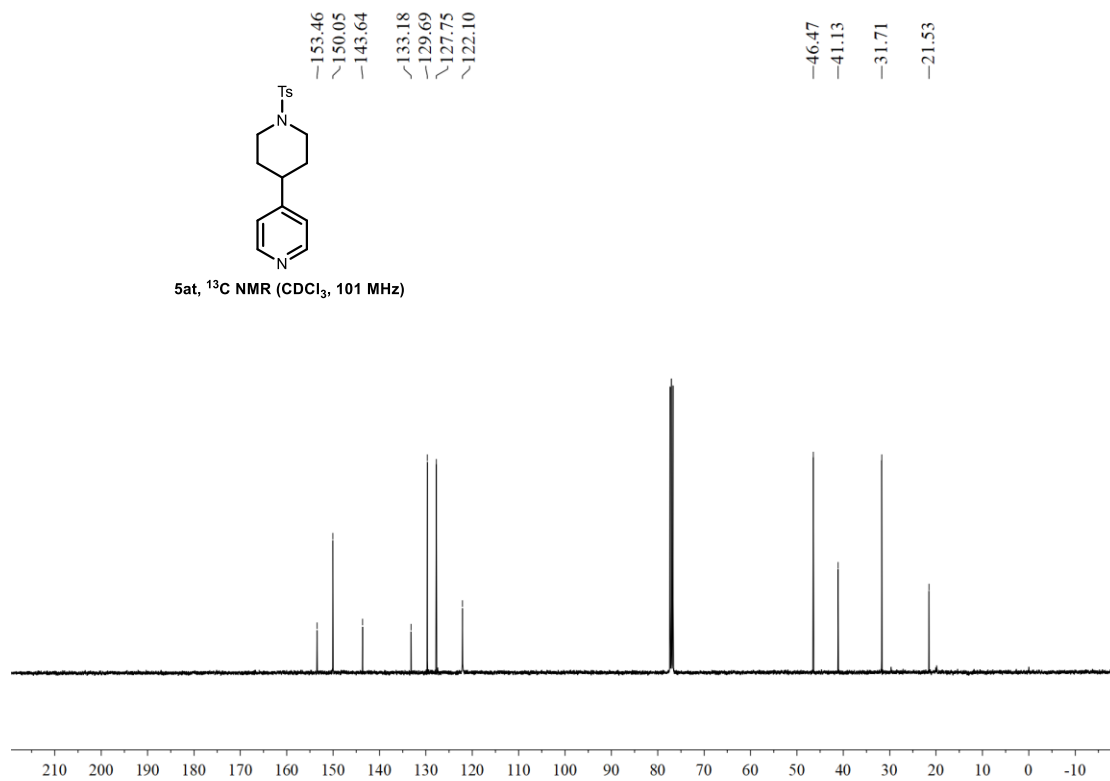

Figure S162.  $^{13}\text{C NMR}$  of **5at** ( $\text{CDCl}_3$ , 101 MHz)

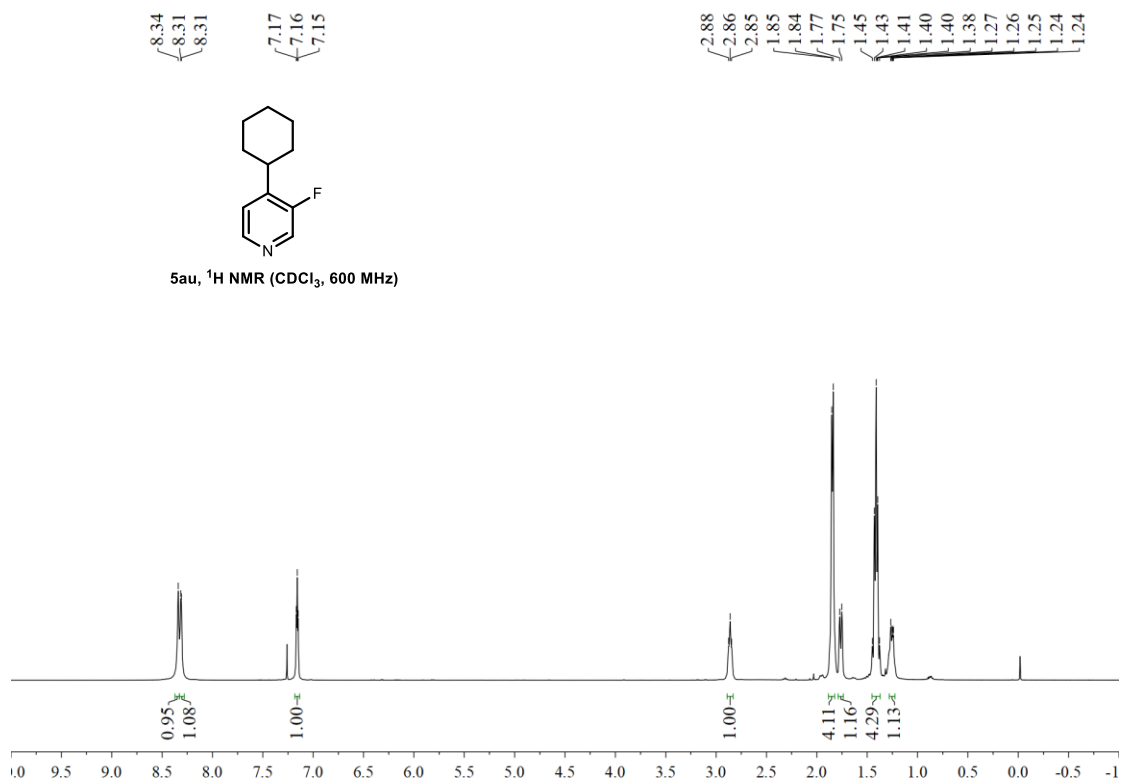

**Figure S163.  $^1\text{H NMR}$  of 5au ( $\text{CDCl}_3$ , 600 MHz)**

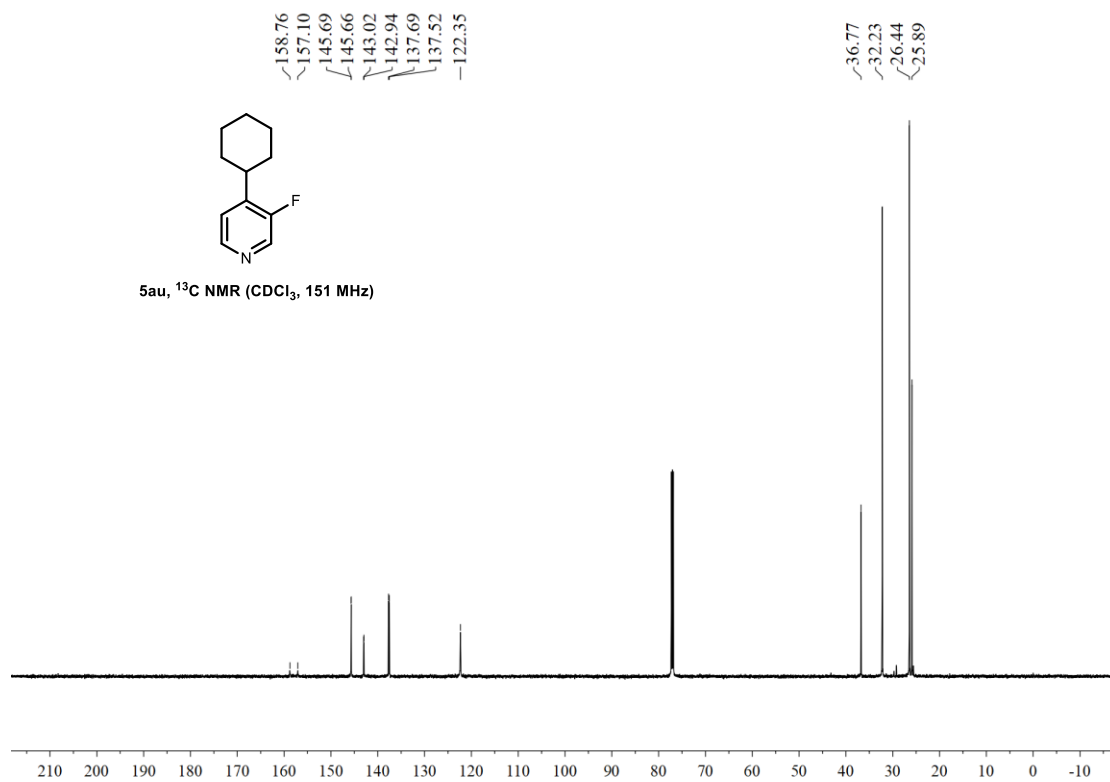

**Figure S164.  $^{13}\text{C NMR}$  of 5au ( $\text{CDCl}_3$ , 151 MHz)**

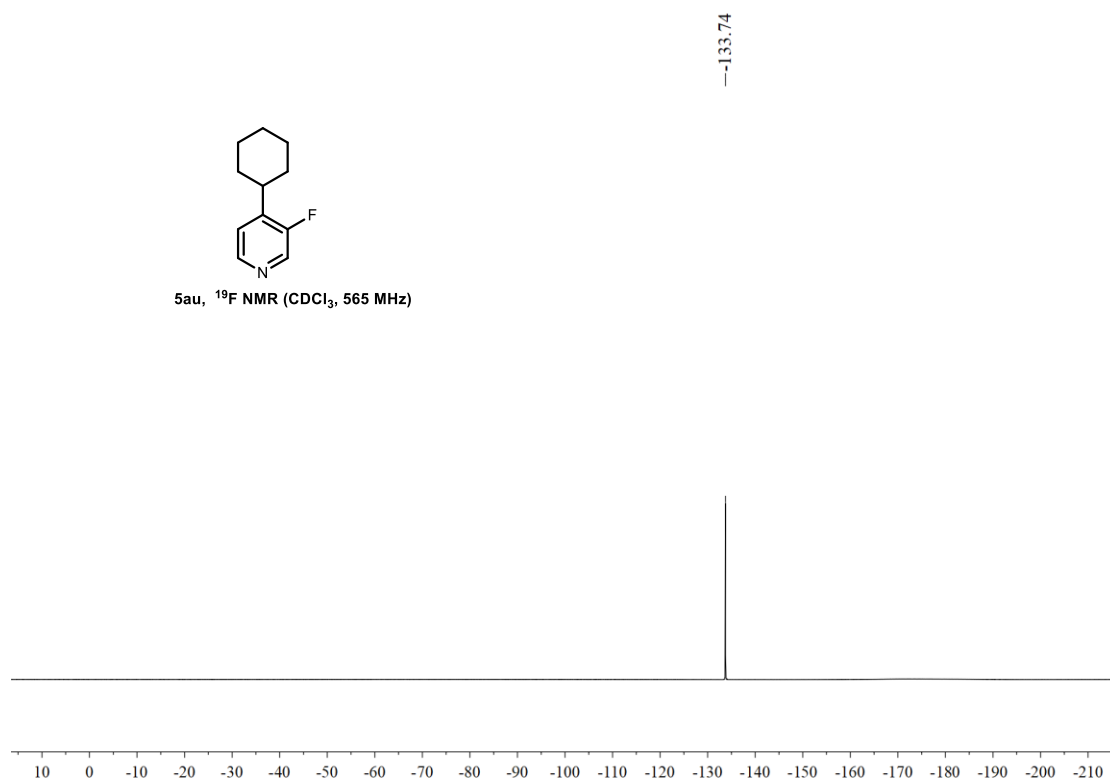

**Figure S165.**  $^{19}\text{F}$  NMR of **5au** ( $\text{CDCl}_3$ , 565 MHz)

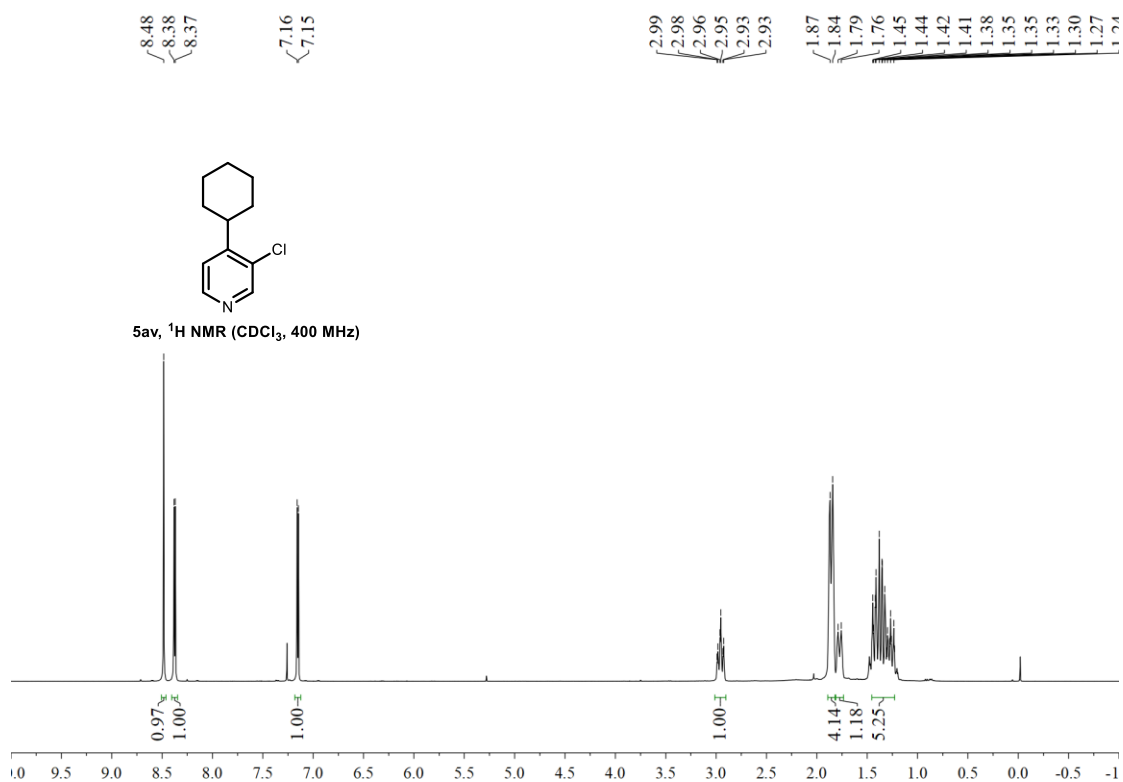

**Figure S166.  $^1\text{H}$  NMR of 5av (CDCl<sub>3</sub>, 400 MHz)**

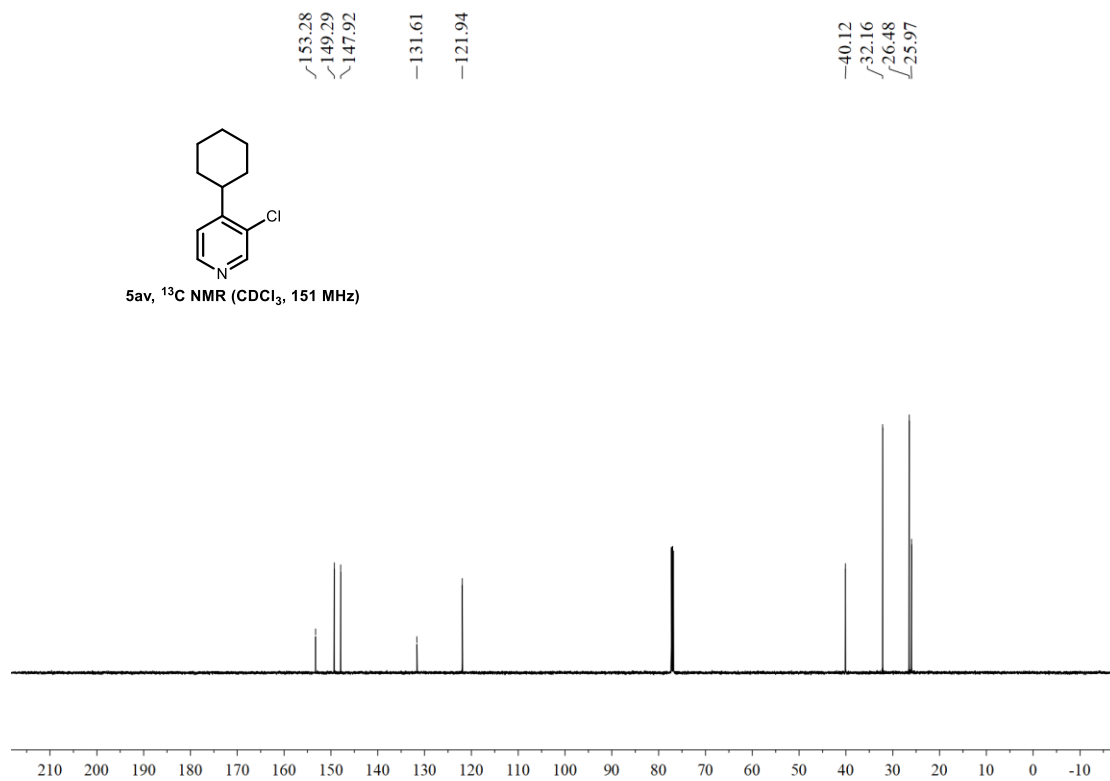

**Figure S167.  $^{13}\text{C}$  NMR of 5av (CDCl<sub>3</sub>, 151 MHz)**

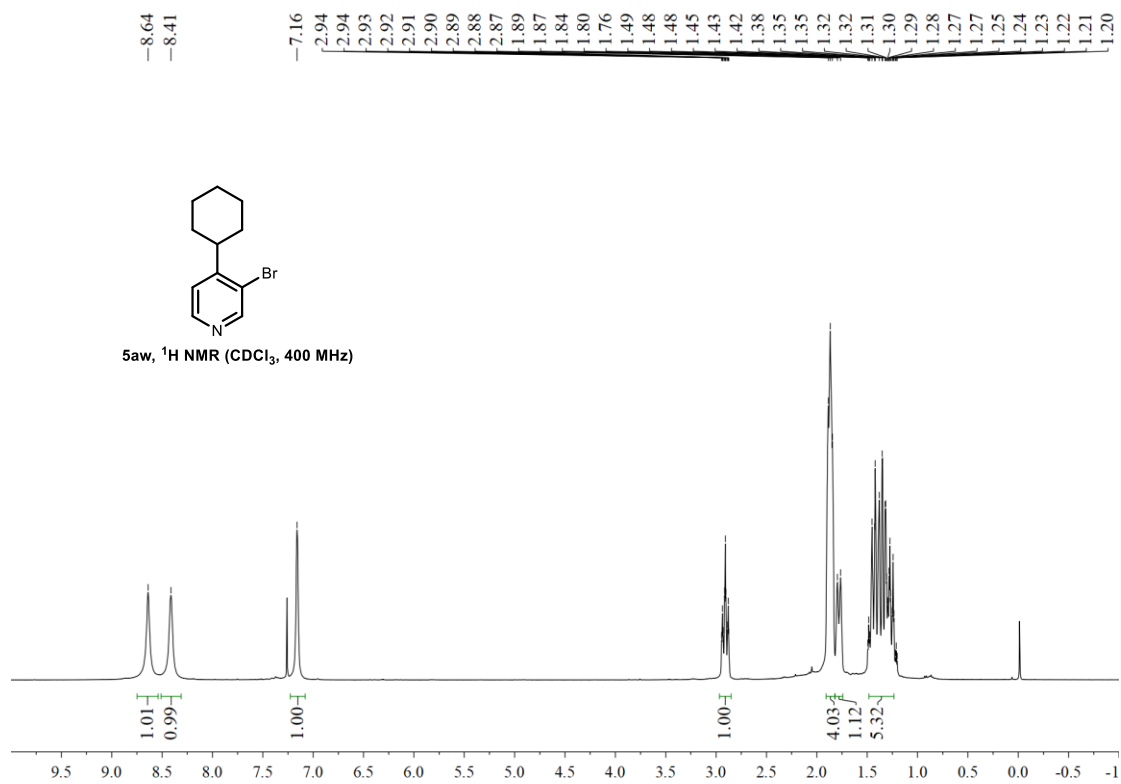

**Figure S168.**  $^1\text{H NMR}$  of **5aw** ( $\text{CDCl}_3$ , 400 MHz)

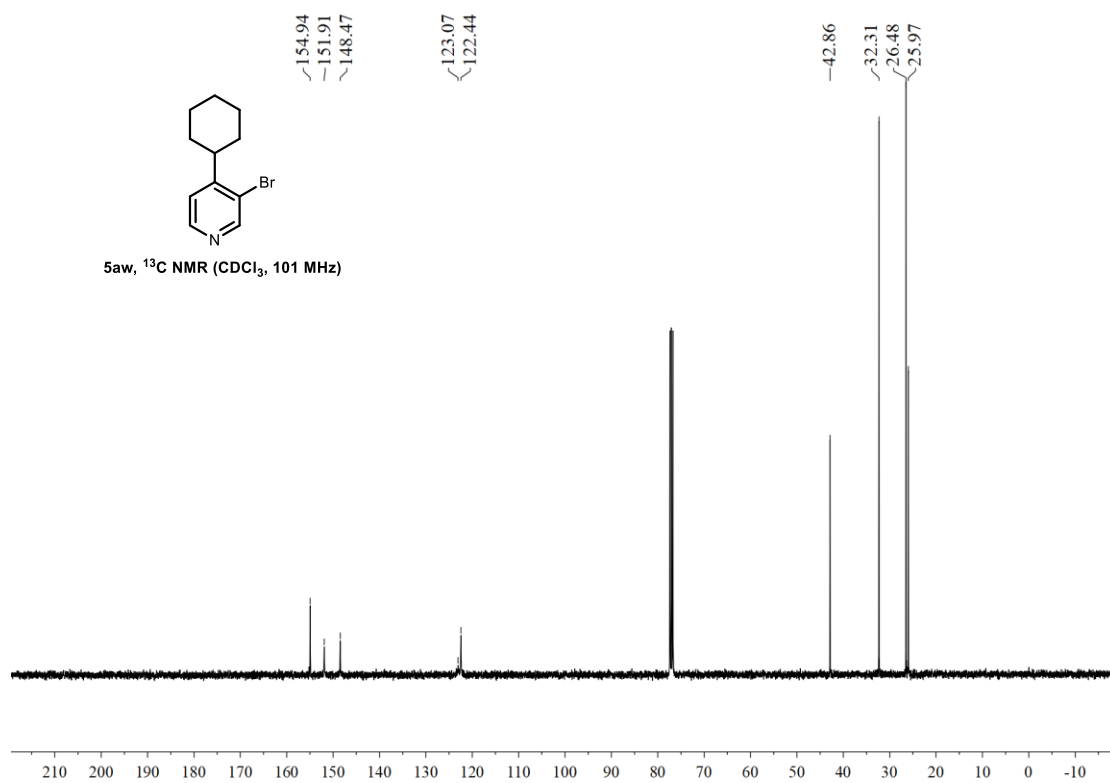

**Figure S169.**  $^{13}\text{C NMR}$  of **5aw** ( $\text{CDCl}_3$ , 101 MHz)

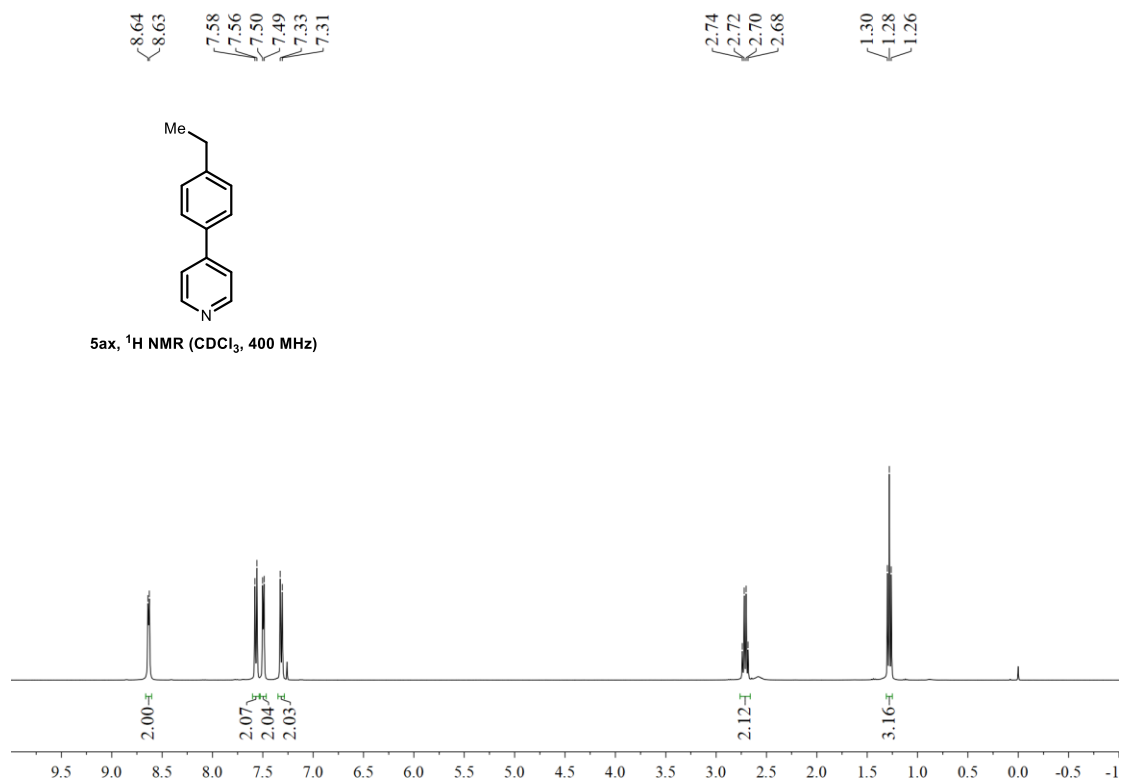

**Figure S170.**  $^1\text{H}$  NMR of **5ax** (CDCl<sub>3</sub>, 400 MHz)

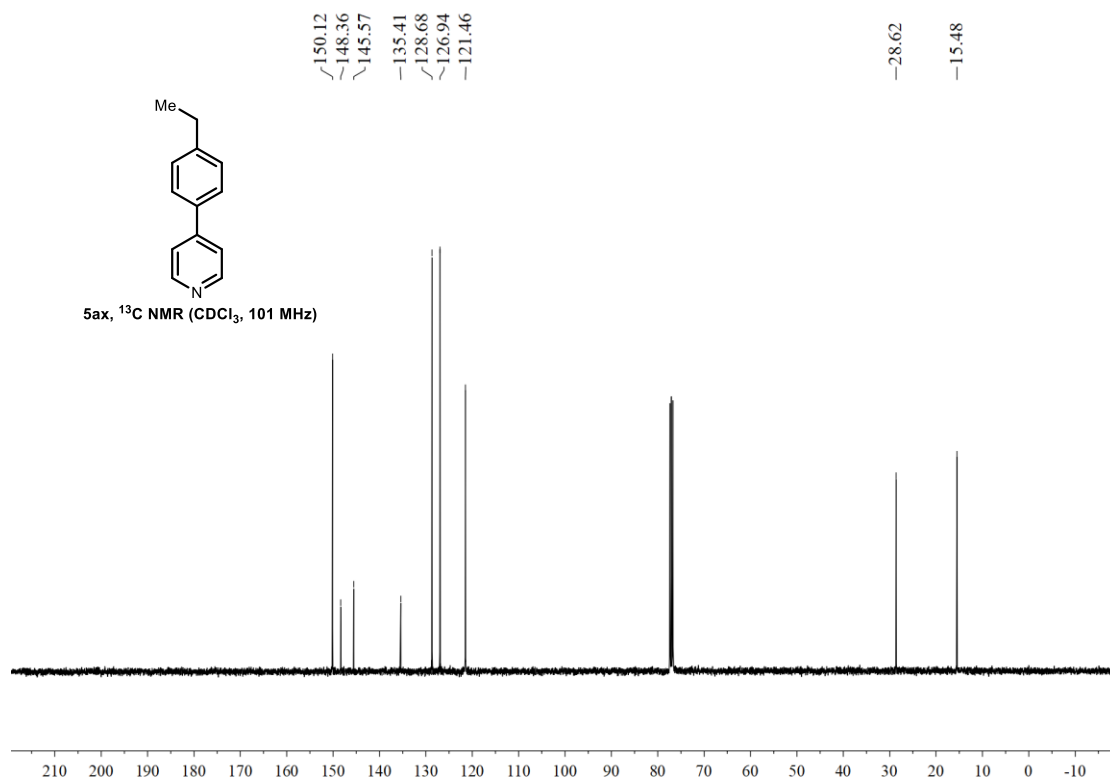

**Figure S171.**  $^{13}\text{C}$  NMR of **5ax** (CDCl<sub>3</sub>, 101 MHz)

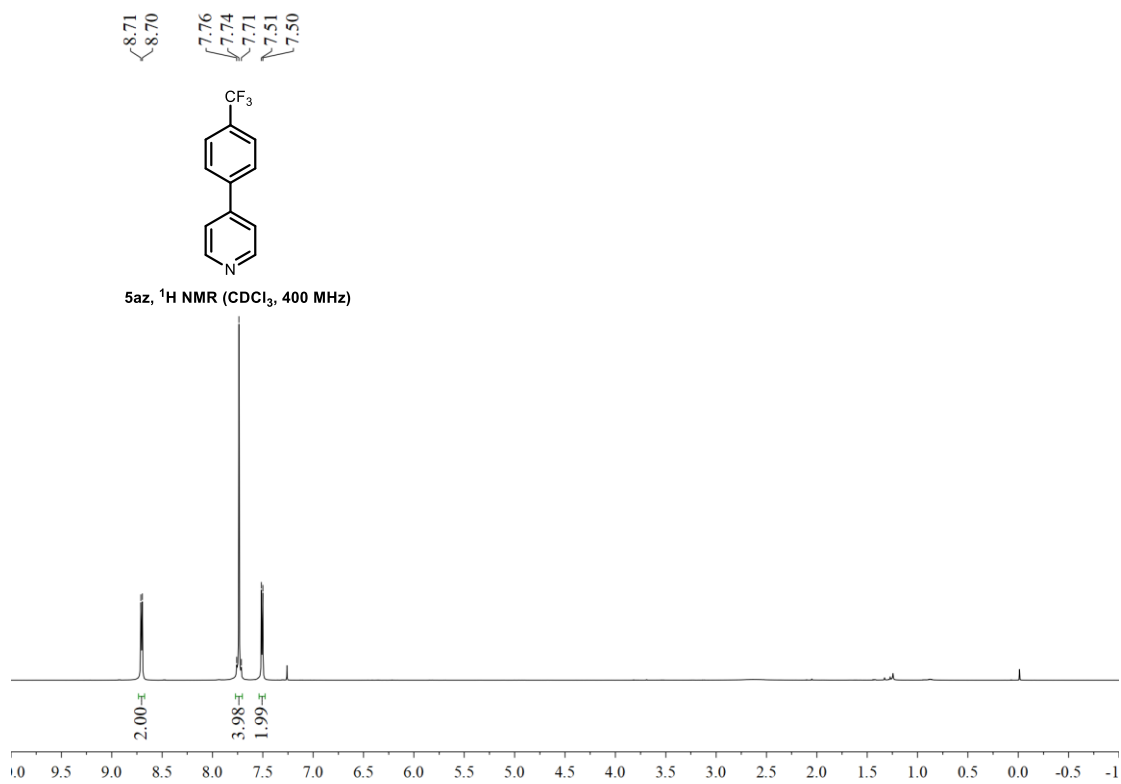

**Figure S172.** <sup>1</sup>H NMR of **5az** (CDCl<sub>3</sub>, 400 MHz)

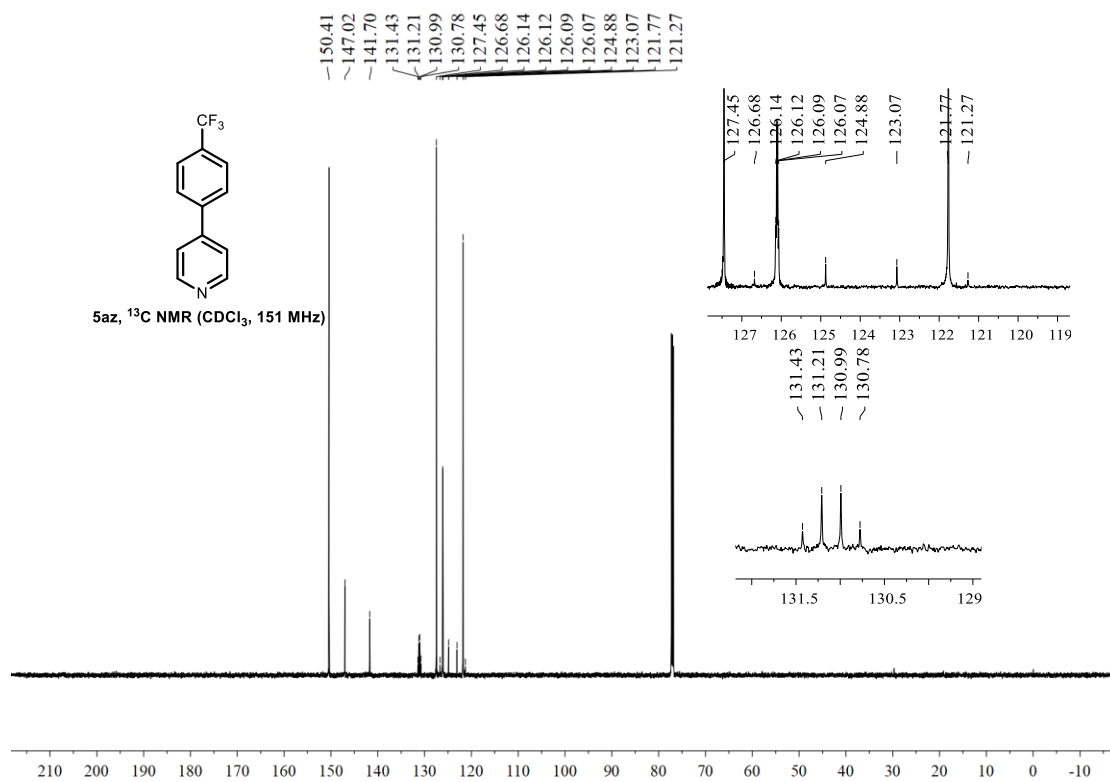

**Figure S173.** <sup>13</sup>C NMR of **5az** (CDCl<sub>3</sub>, 151 MHz)

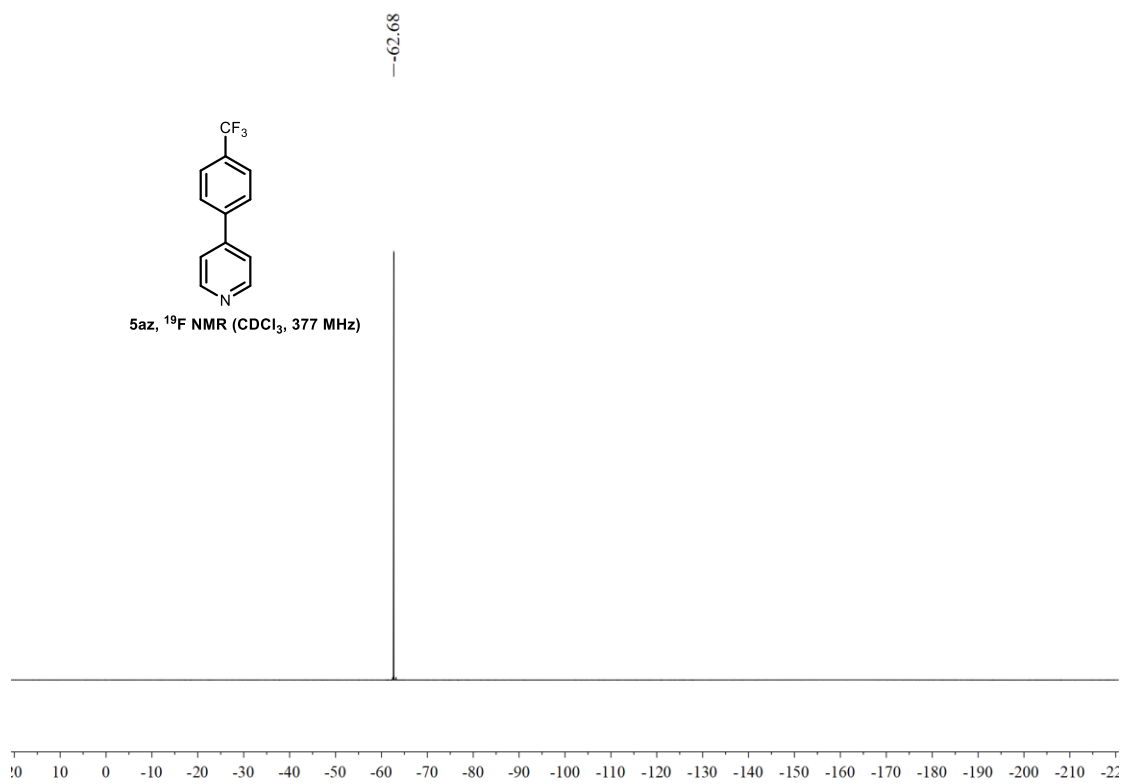

**Figure S174.**  $^{19}\text{F}$  NMR of **5az** ( $\text{CDCl}_3$ , 377 MHz)



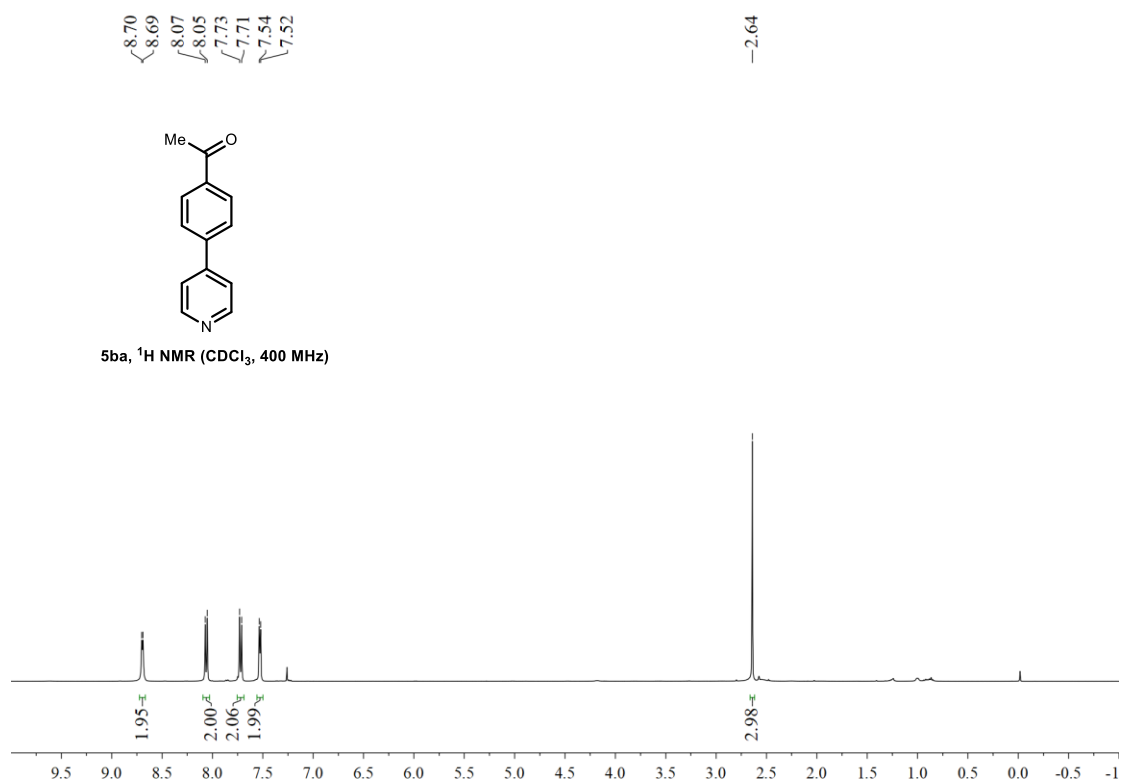

**Figure S175.  $^1\text{H}$  NMR of 5ba ( $\text{CDCl}_3$ , 400 MHz)**

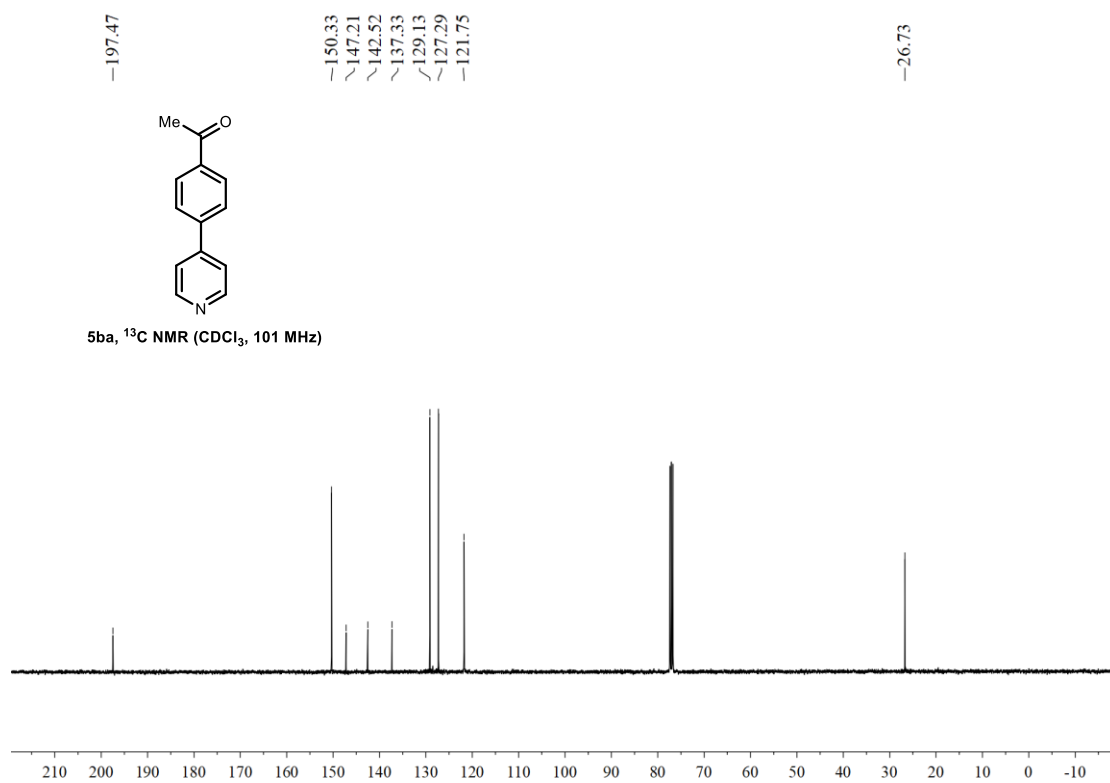

**Figure S176.  $^{13}\text{C}$  NMR of 5ba ( $\text{CDCl}_3$ , 101 MHz)**

8.71  
8.70  
8.12  
7.97  
7.95  
7.94  
7.93  
7.91  
7.90  
7.88  
7.88  
7.76  
7.75  
7.74  
7.73  
7.64  
7.63  
7.57  
7.56  
7.55  
7.55  
7.54  
7.53  
7.52

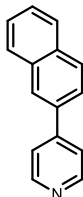

5bb,  $^1\text{H}$  NMR ( $\text{CDCl}_3$ , 400 MHz)

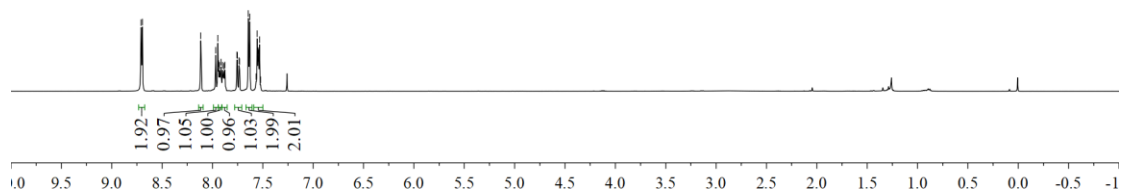

Figure S177.  $^1\text{H}$  NMR of 5bb ( $\text{CDCl}_3$ , 400 MHz)

150.19  
148.44  
135.34  
133.48  
129.00  
128.48  
127.76  
126.90  
126.75  
126.49  
124.52  
121.90

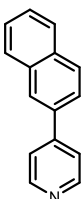

5bb,  $^{13}\text{C}$  NMR ( $\text{CDCl}_3$ , 101 MHz)

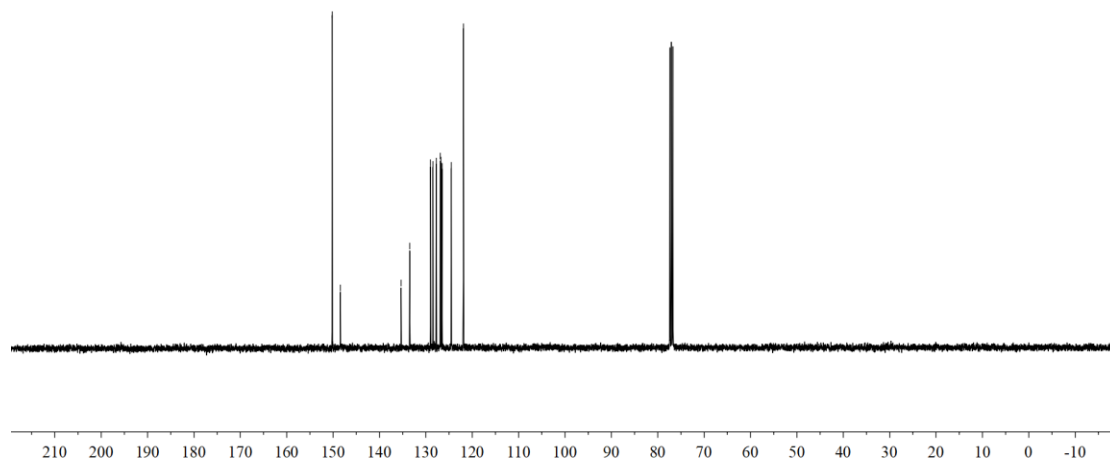

Figure S178.  $^{13}\text{C}$  NMR of 5bb ( $\text{CDCl}_3$ , 101 MHz)

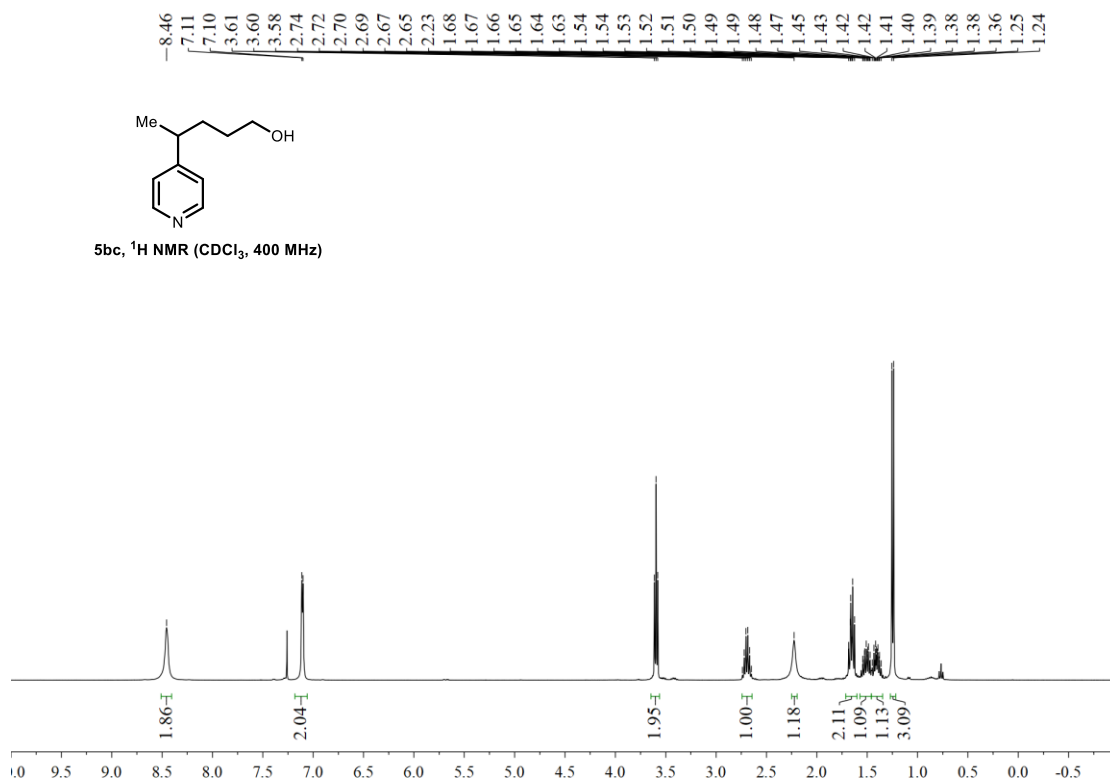

**Figure S179.**  $^1\text{H NMR}$  of **5bc** ( $\text{CDCl}_3$ , 400 MHz)

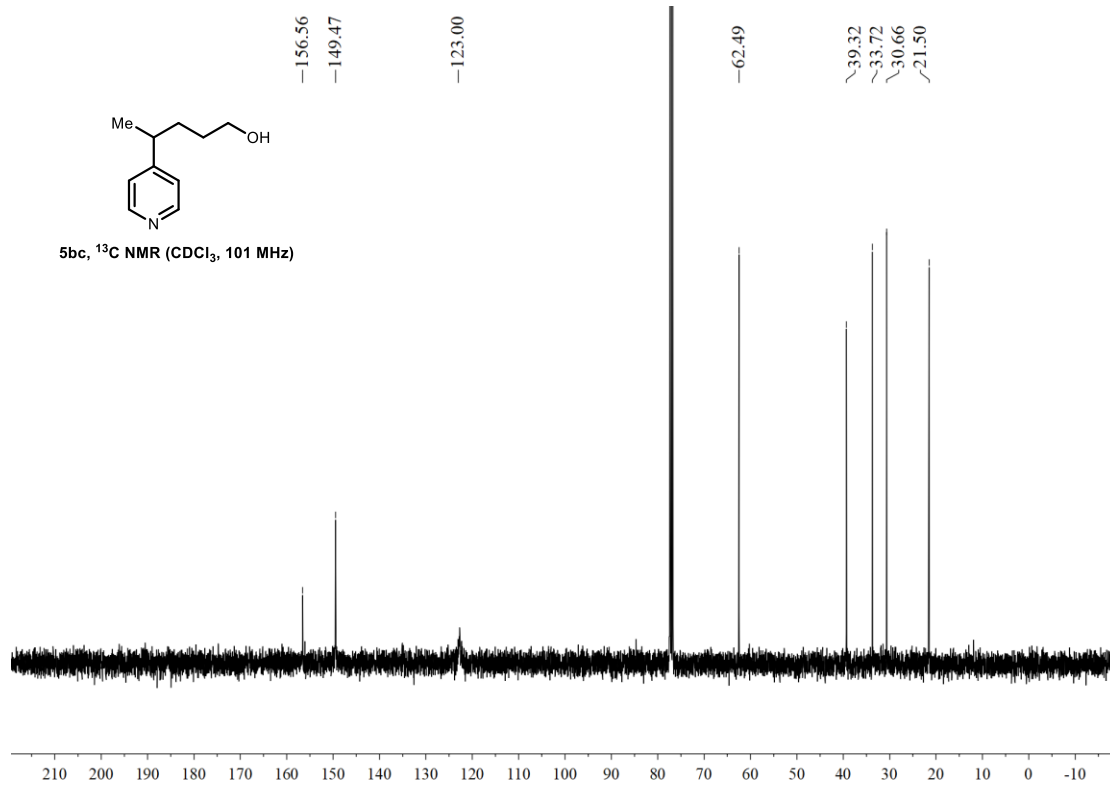

**Figure S180.**  $^{13}\text{C NMR}$  of **5bc** ( $\text{CDCl}_3$ , 101 MHz)

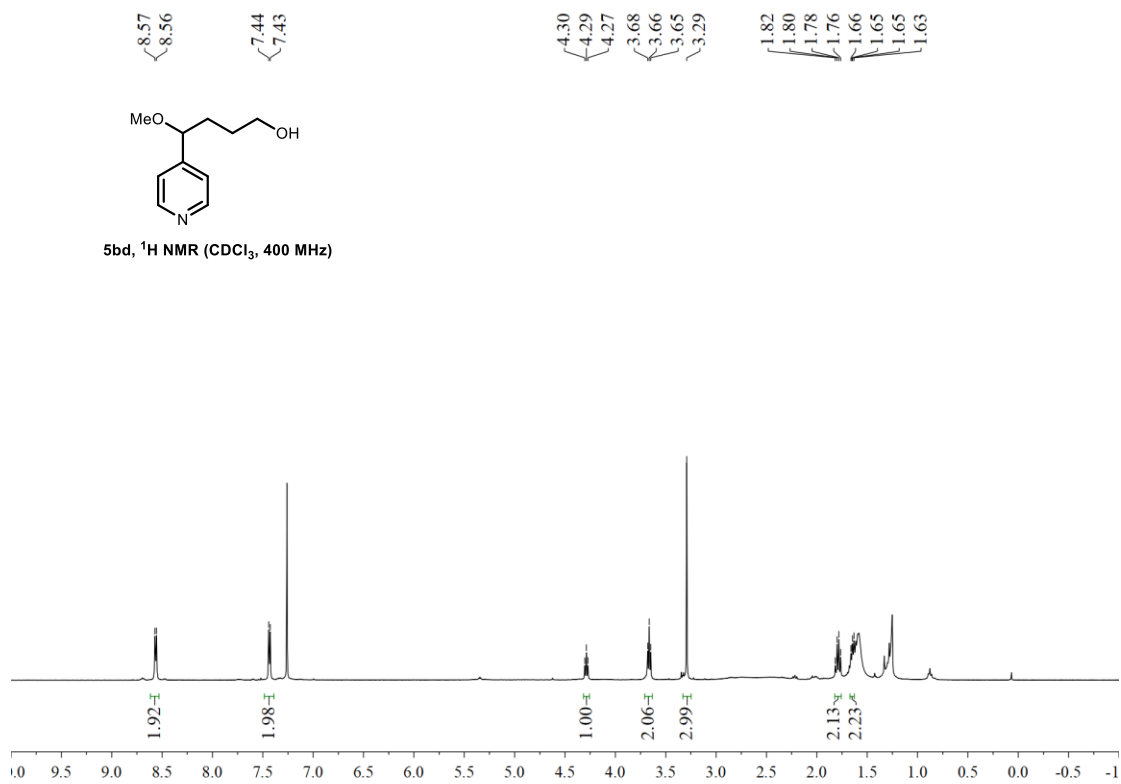

Figure S181. <sup>1</sup>H NMR of 5bd (CDCl<sub>3</sub>, 400 MHz)

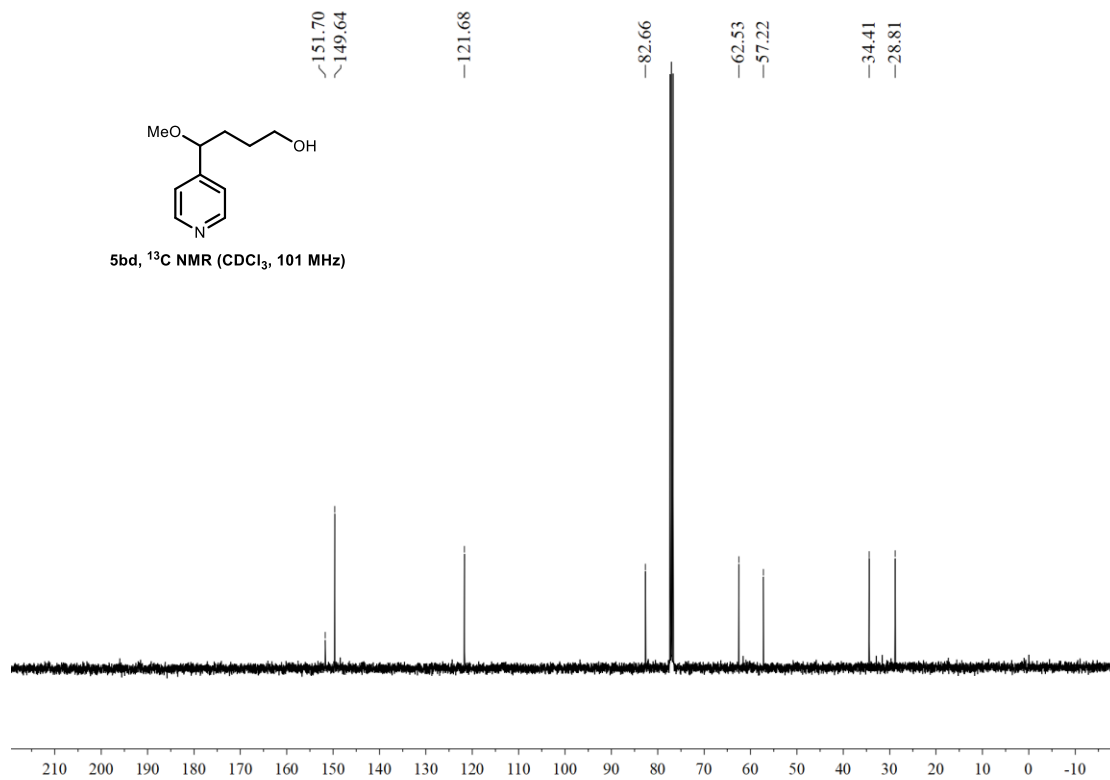

Figure S182. <sup>13</sup>C NMR of 5bd (CDCl<sub>3</sub>, 101 MHz)

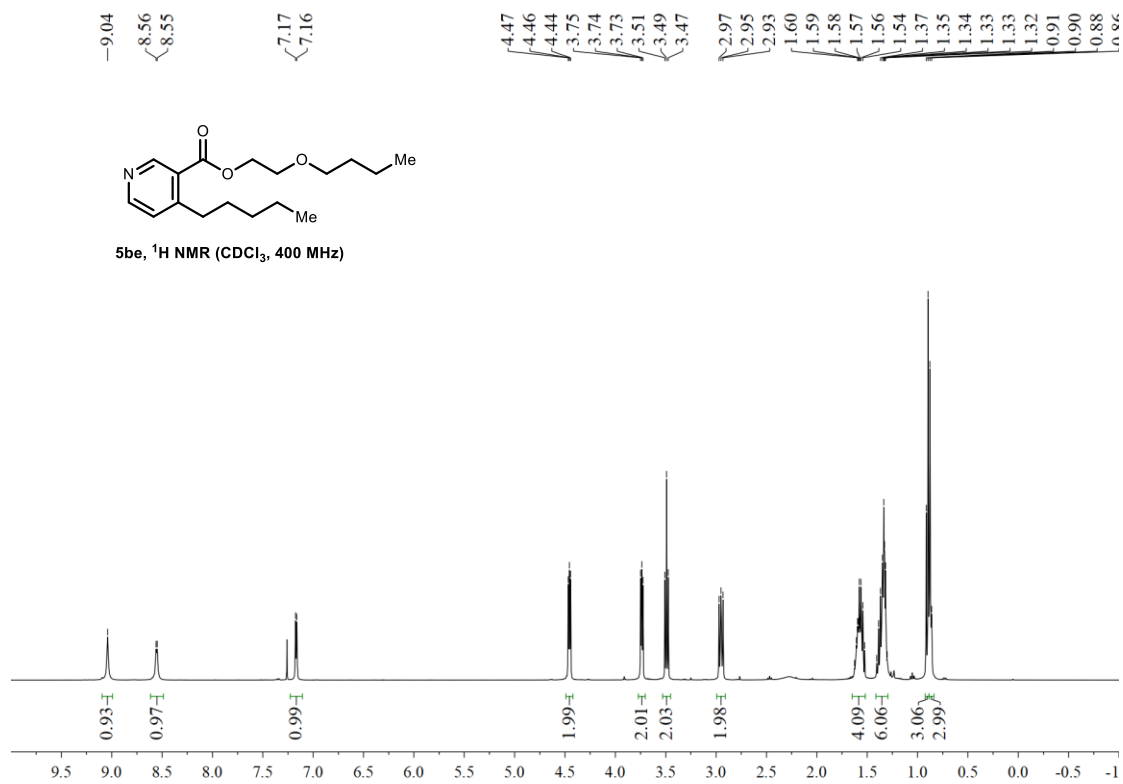

**Figure S183.  $^1\text{H}$  NMR of **5be** ( $\text{CDCl}_3$ , 400 MHz)**

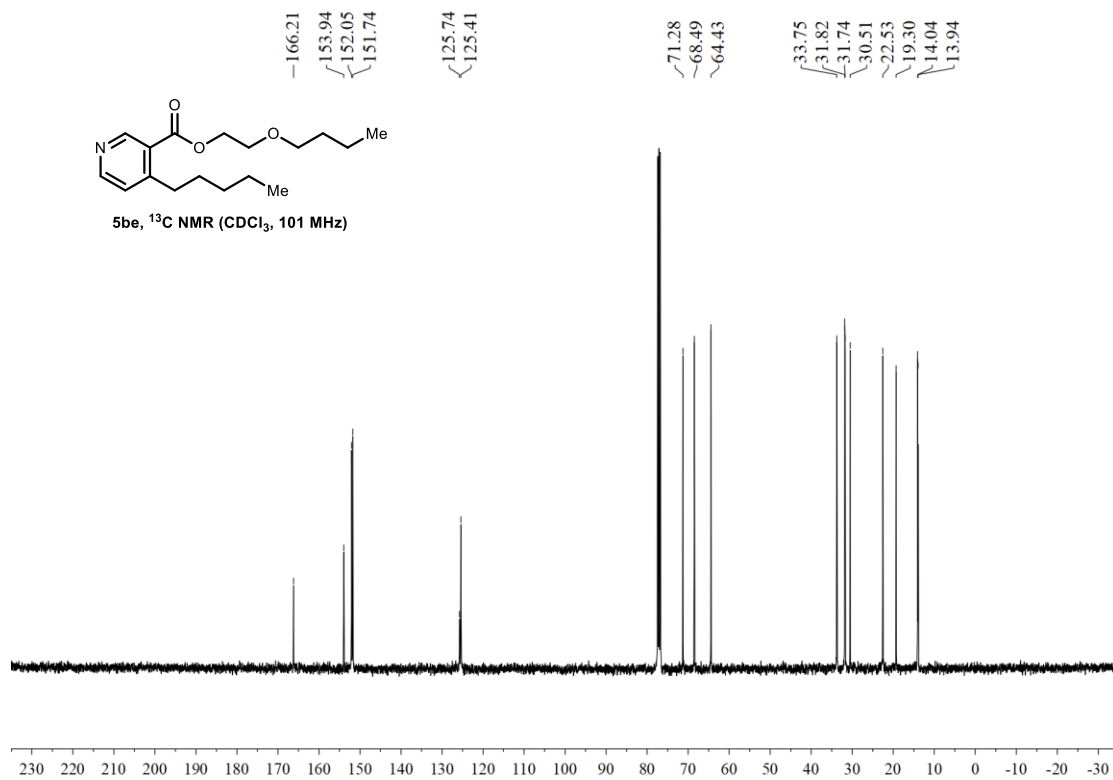

**Figure S184.  $^{13}\text{C}$  NMR of **5be** ( $\text{CDCl}_3$ , 101 MHz)**

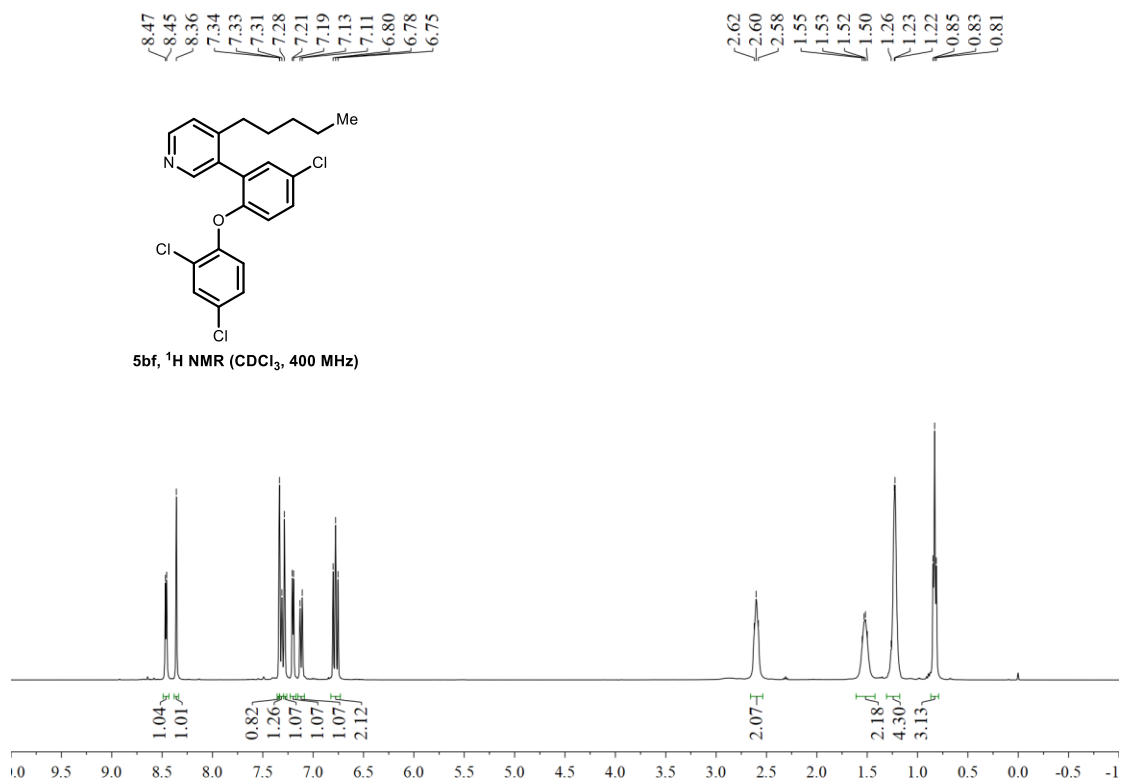

Figure S185.  $^1\text{H}$  NMR of **5bf** ( $\text{CDCl}_3$ , 400 MHz)

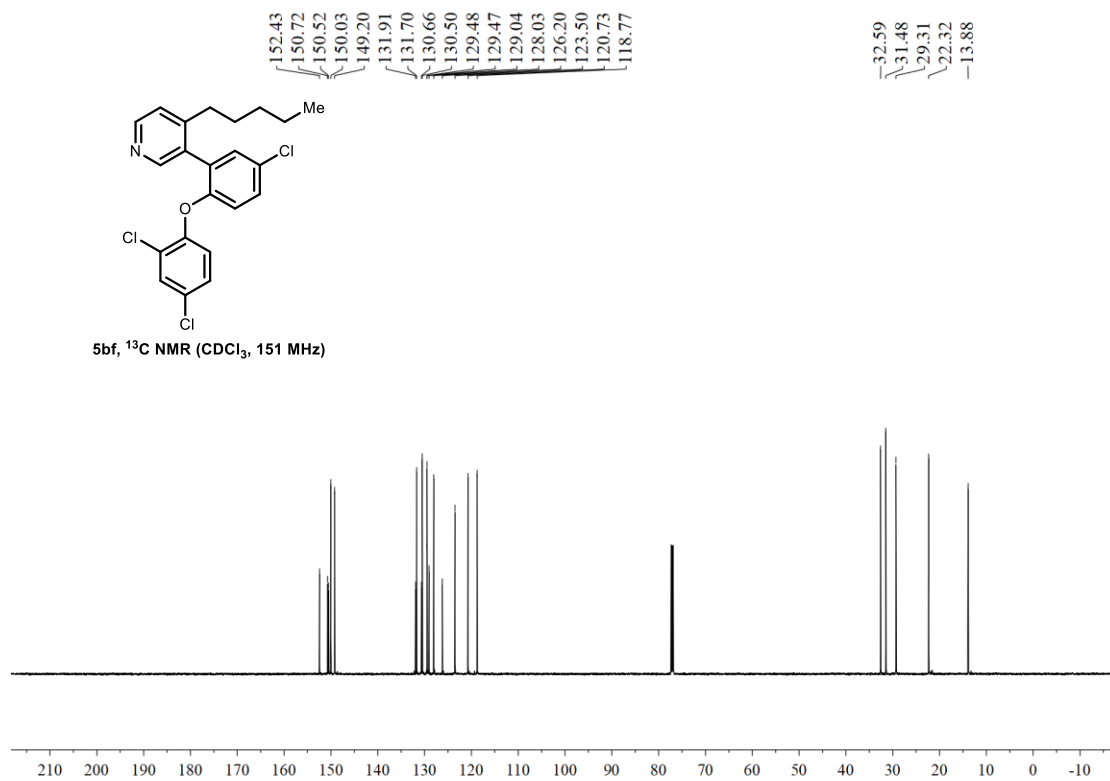

Figure S186.  $^{13}\text{C}$  NMR of **5bf** ( $\text{CDCl}_3$ , 151 MHz)

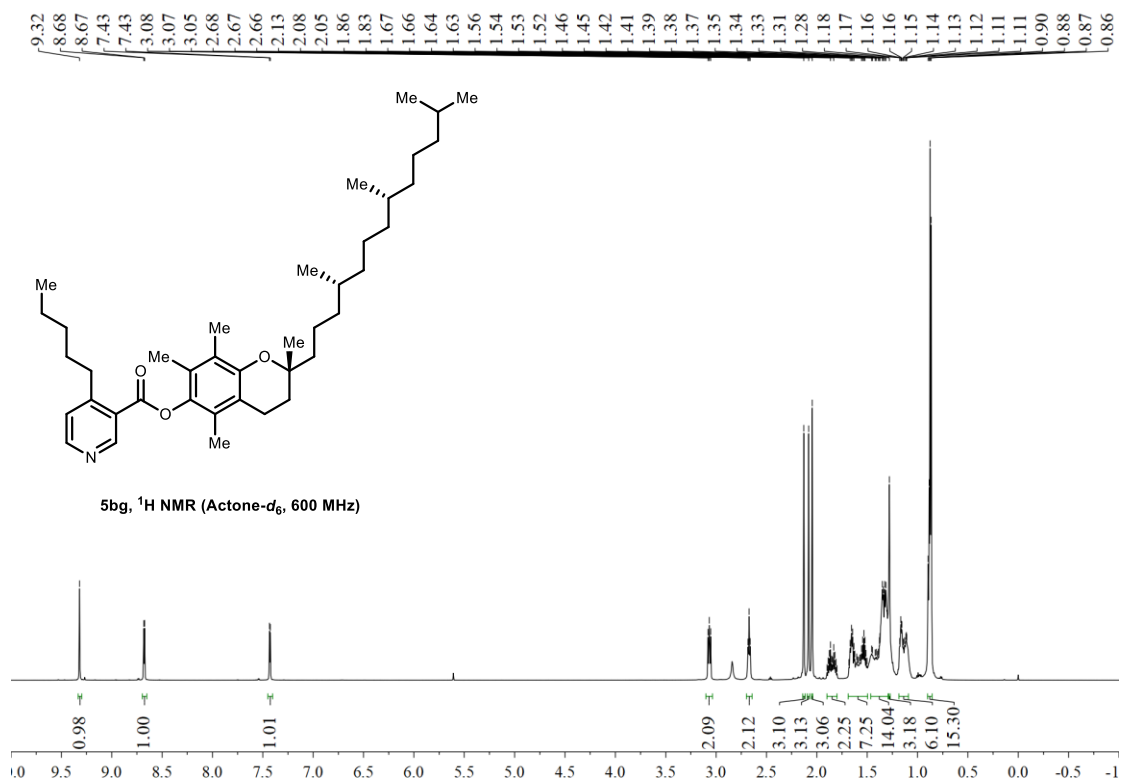

**Figure S187.**  $^1\text{H}$  NMR of **5bg** (Actone- $d_6$ , 600 MHz)

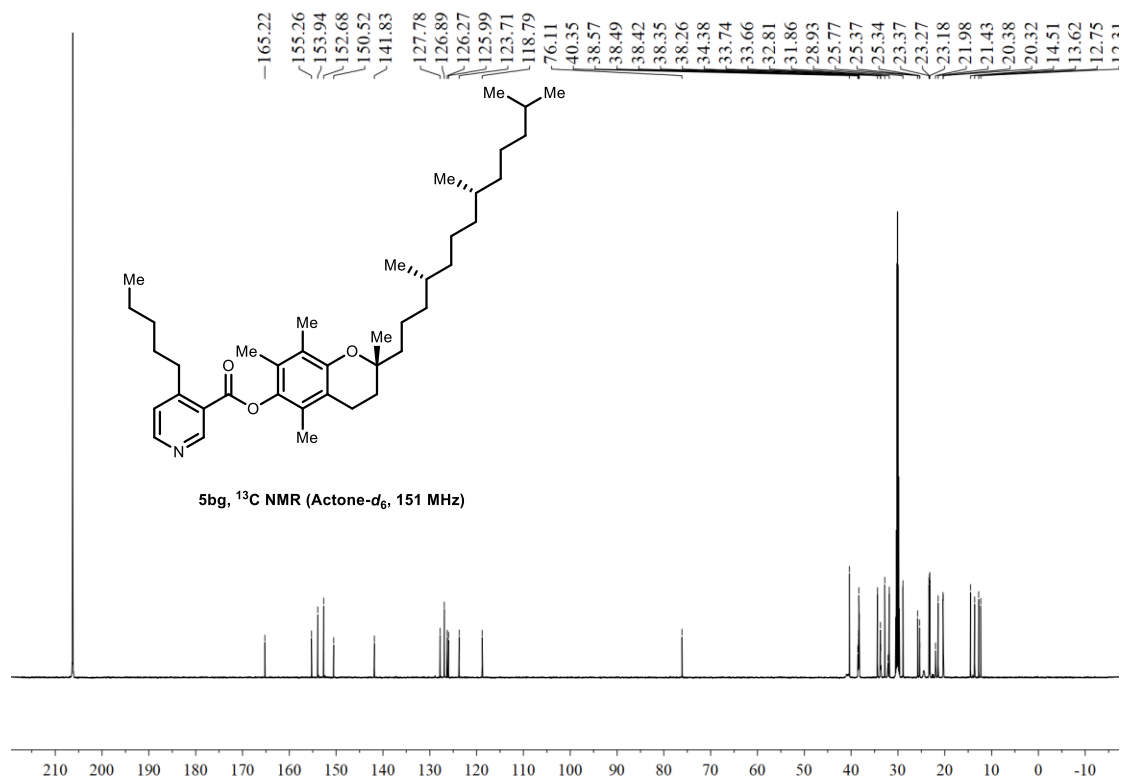

**Figure S188.**  $^{13}\text{C}$  NMR of **5bg** (Actone- $d_6$ , 151 MHz)

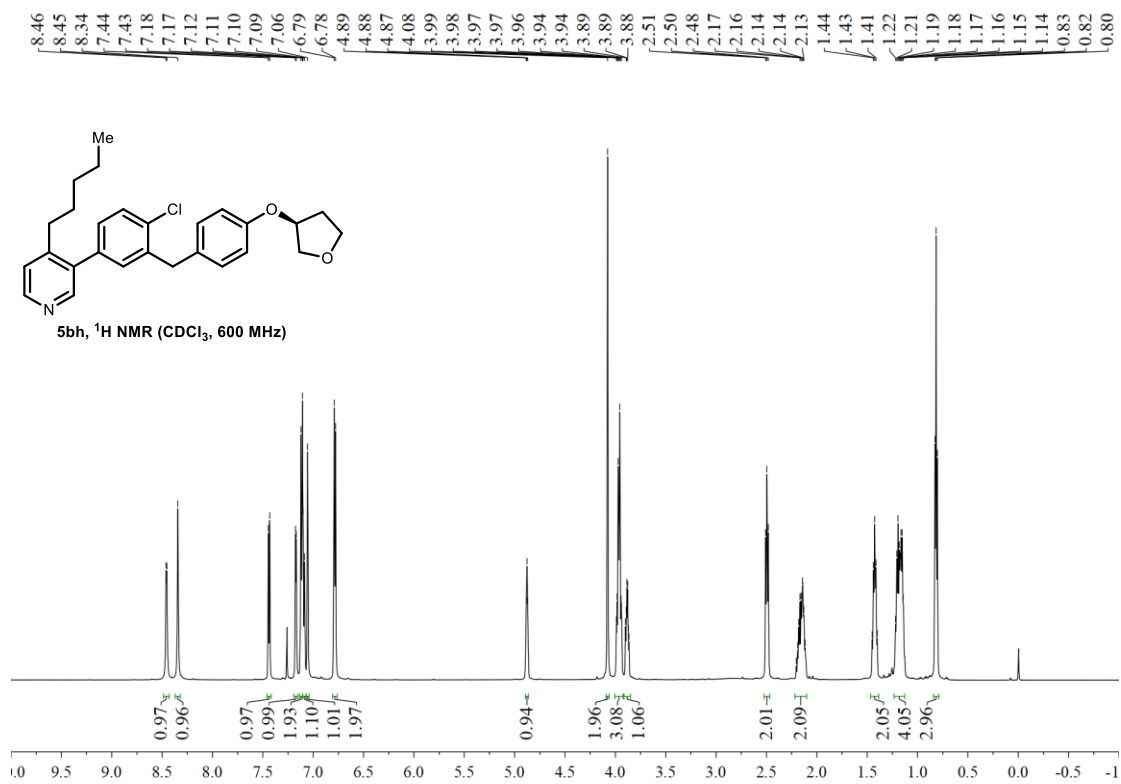

**Figure S189.  $^1\text{H}$  NMR of **5bh** ( $\text{CDCl}_3$ , 600 MHz)**

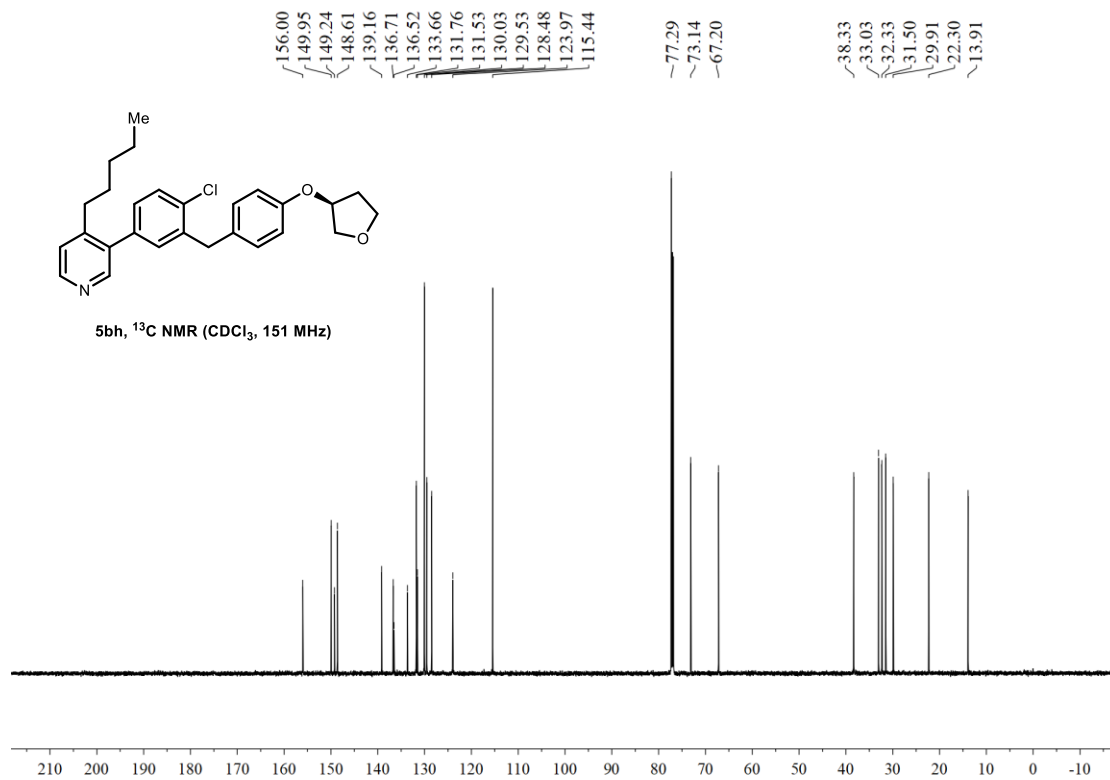

**Figure S190.  $^{13}\text{C}$  NMR of **5bh** ( $\text{CDCl}_3$ , 151 MHz)**



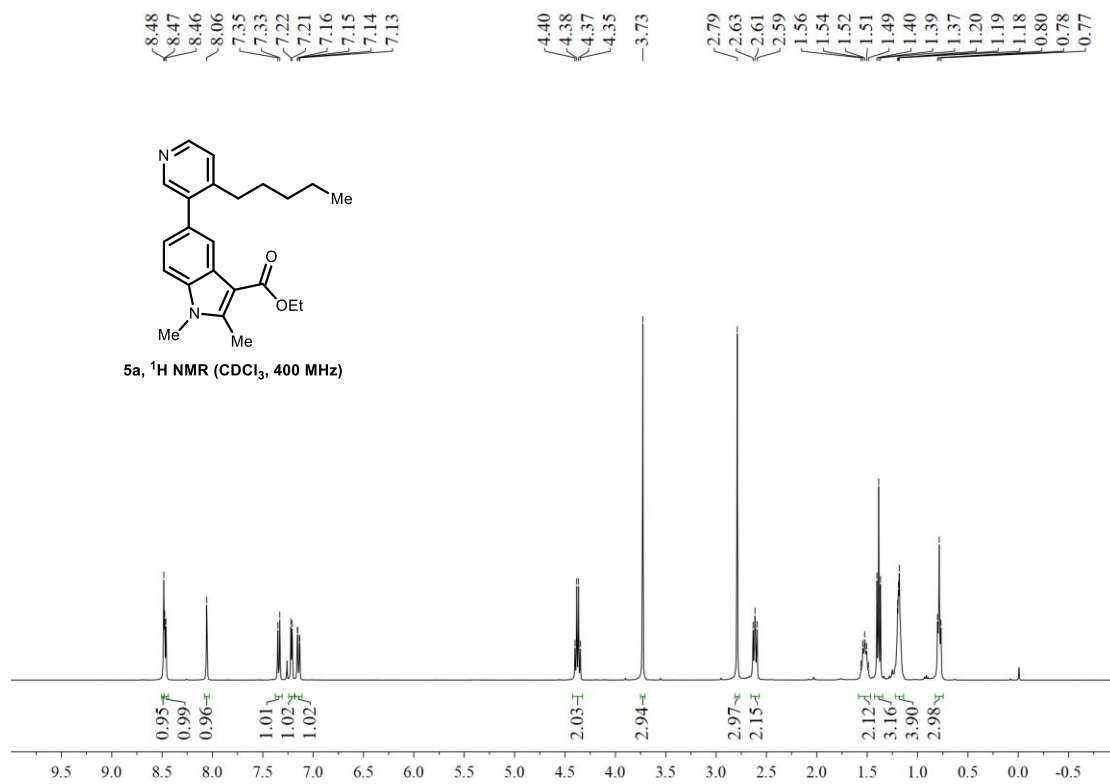

**Figure S191.** <sup>1</sup>H NMR of **5bi** (CDCl<sub>3</sub>, 400 MHz)

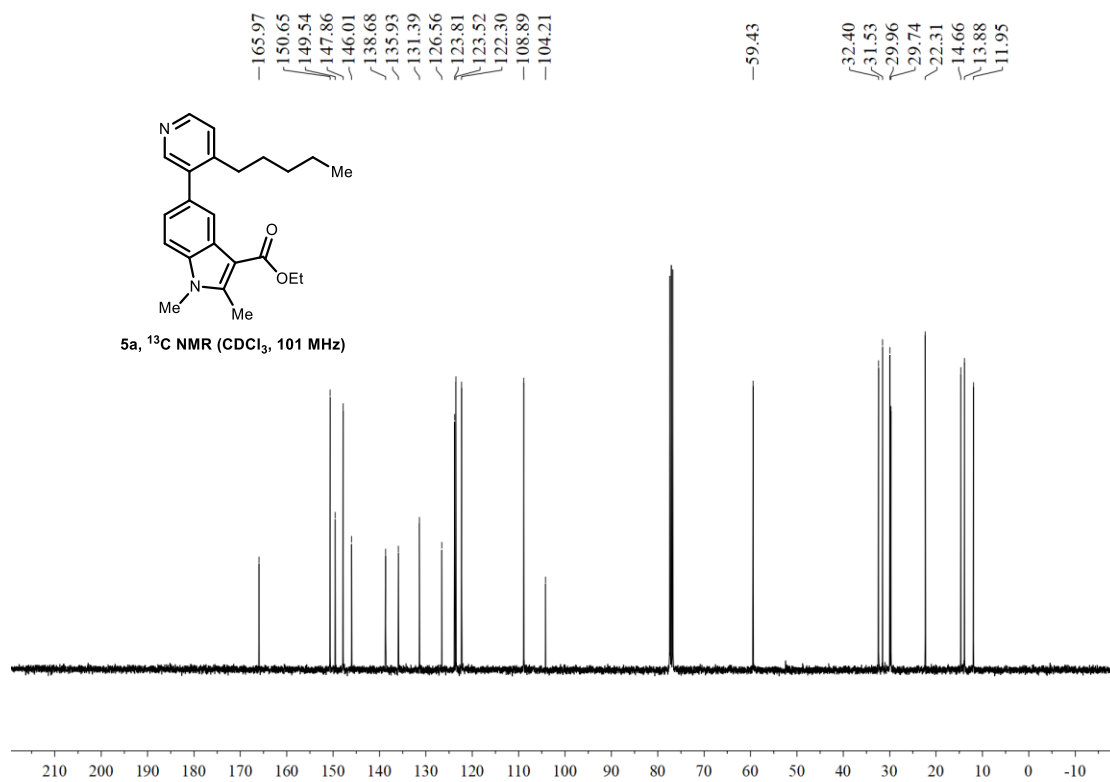

**Figure S192.** <sup>13</sup>C NMR of **5bi** (CDCl<sub>3</sub>, 101 MHz)

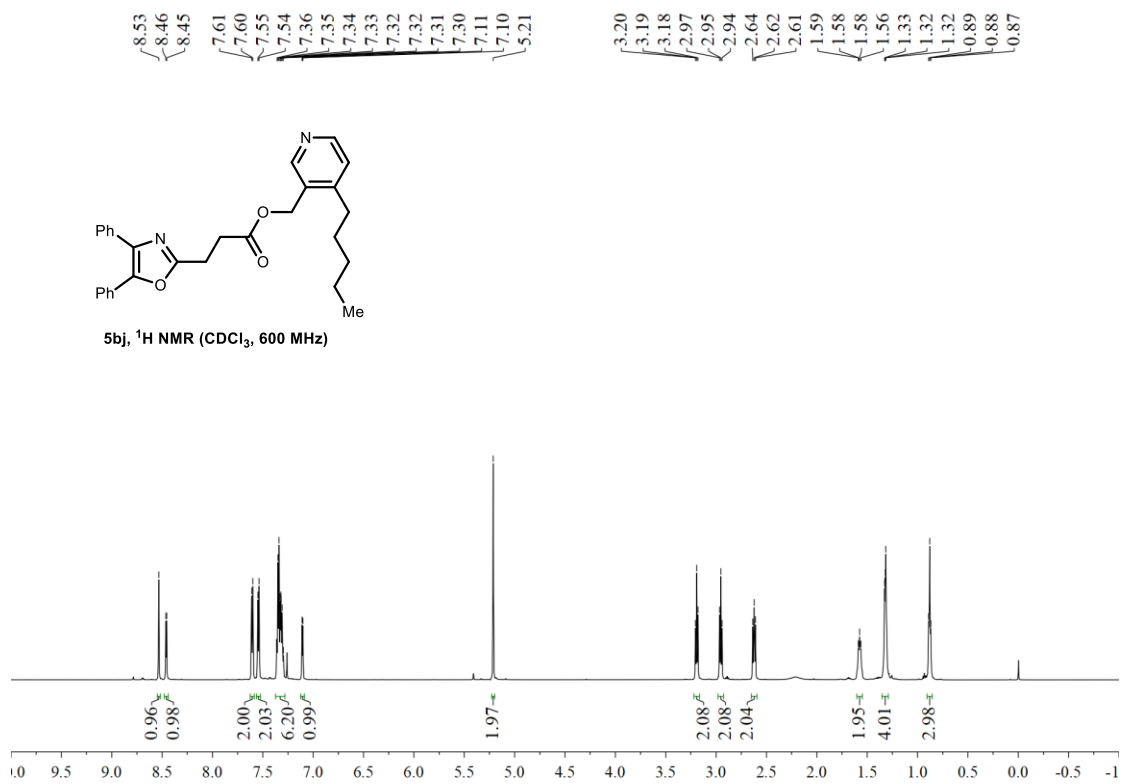

**Figure S193. <sup>1</sup>H NMR of **5bj** (CDCl<sub>3</sub>, 600 MHz)**

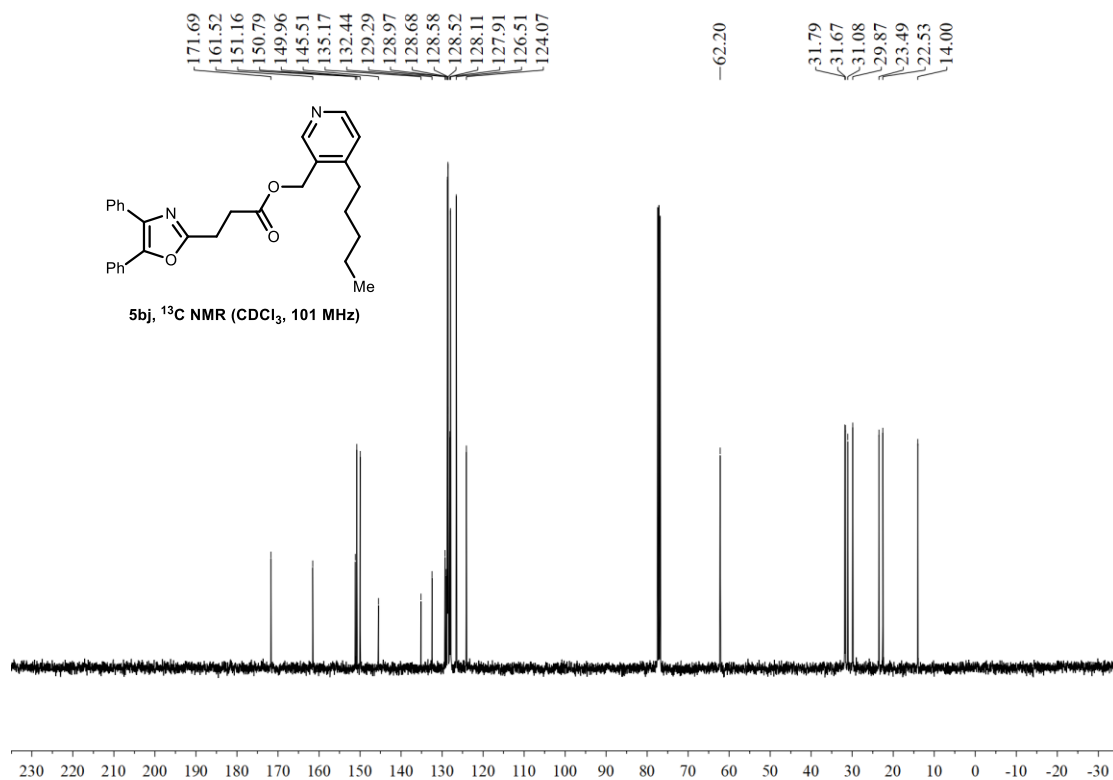

**Figure S194. <sup>13</sup>C NMR of **5bj** (CDCl<sub>3</sub>, 101 MHz)**

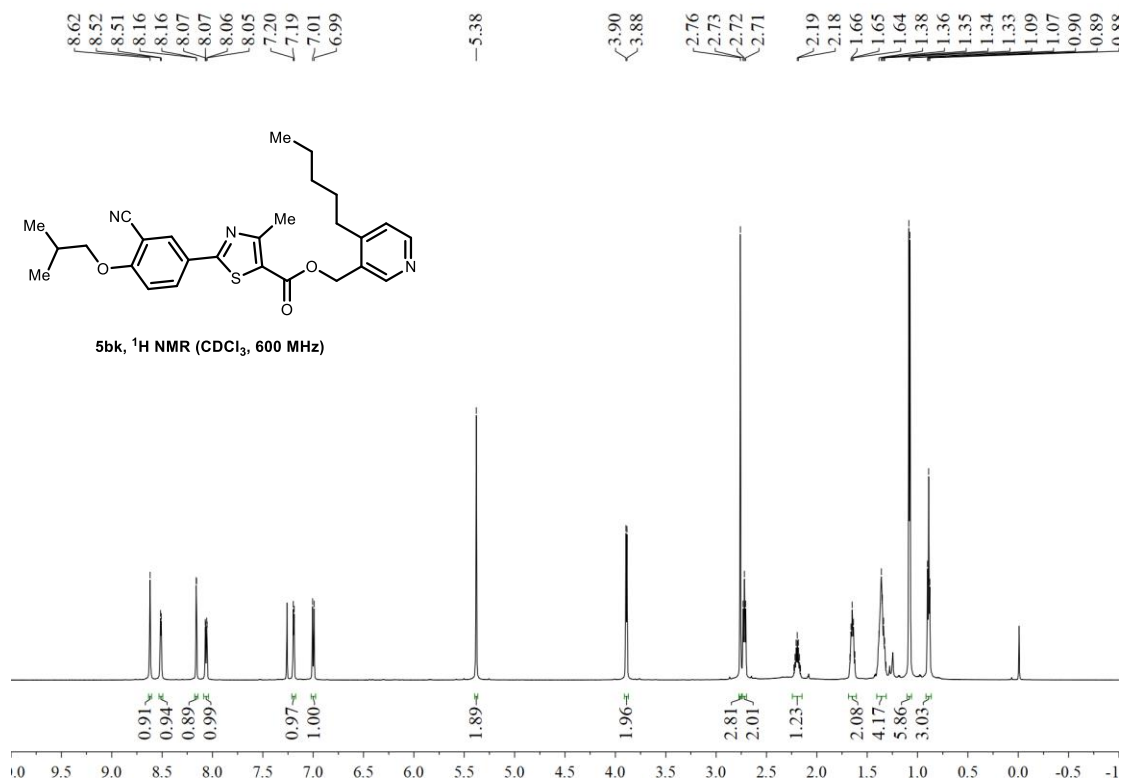

**Figure S195.**  $^1\text{H}$  NMR of **5bk** ( $\text{CDCl}_3$ , 600 MHz)

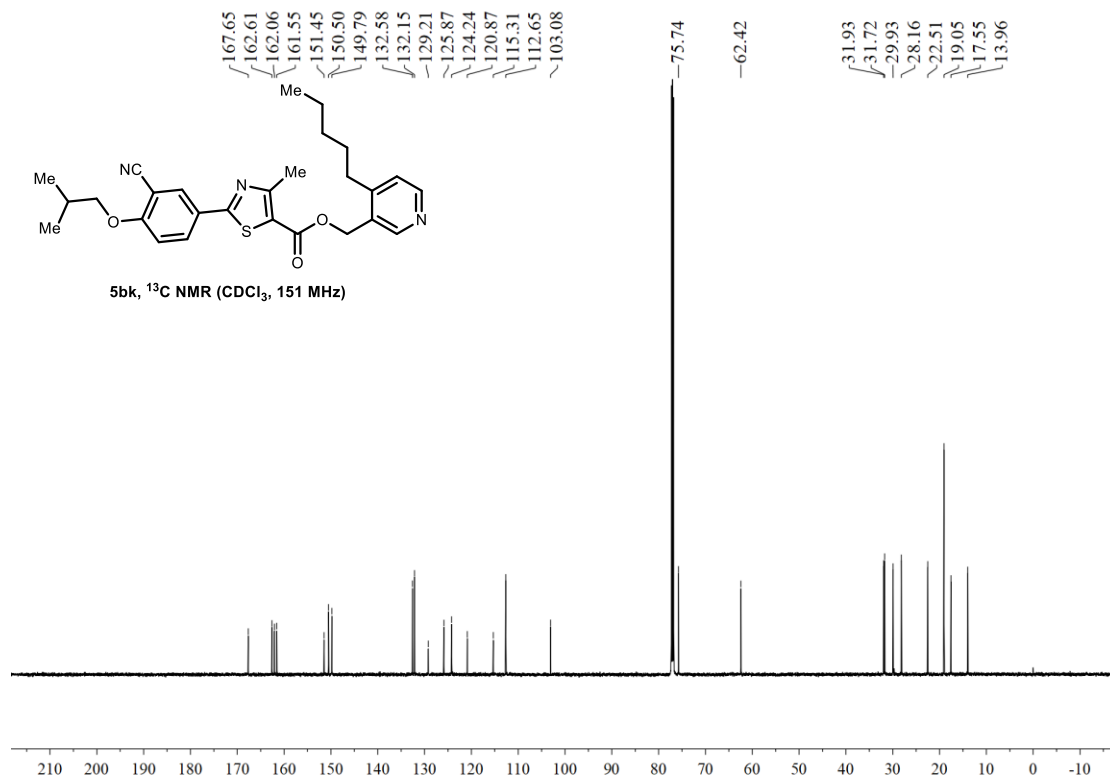

**Figure S196.**  $^{13}\text{C}$  NMR of **5bk** ( $\text{CDCl}_3$ , 151 MHz)

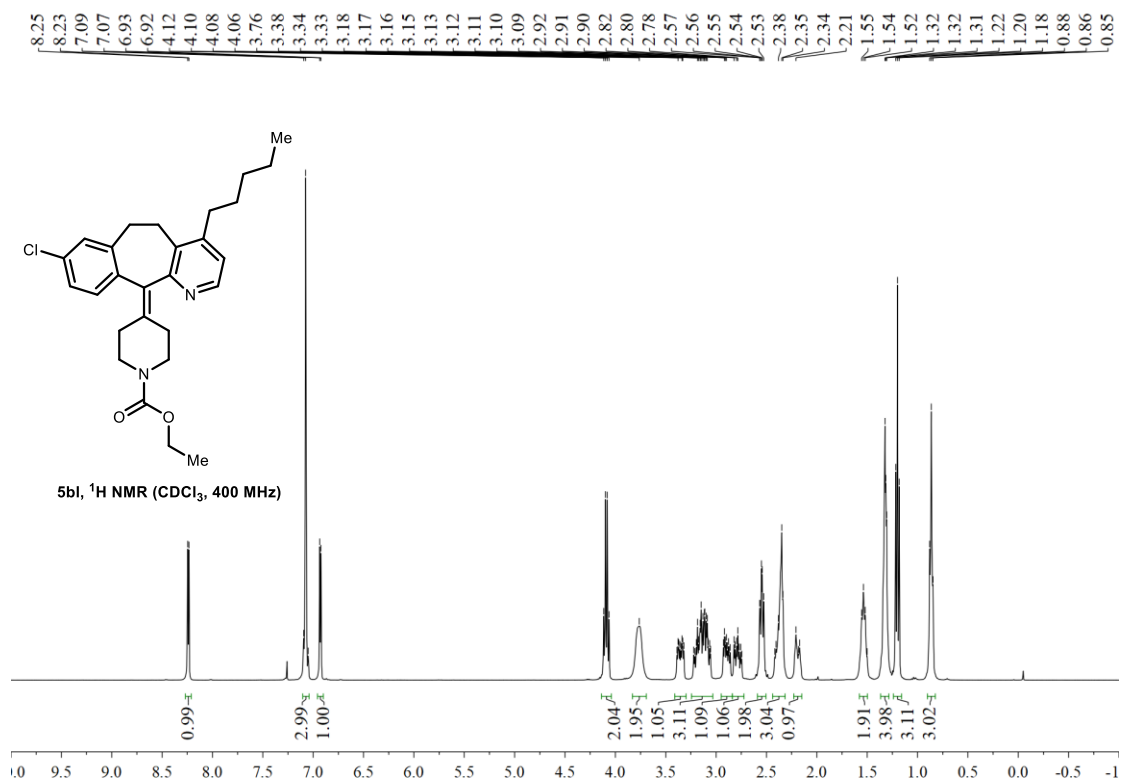

**Figure S197. <sup>1</sup>H NMR of 5bl (CDCl<sub>3</sub>, 400 MHz)**

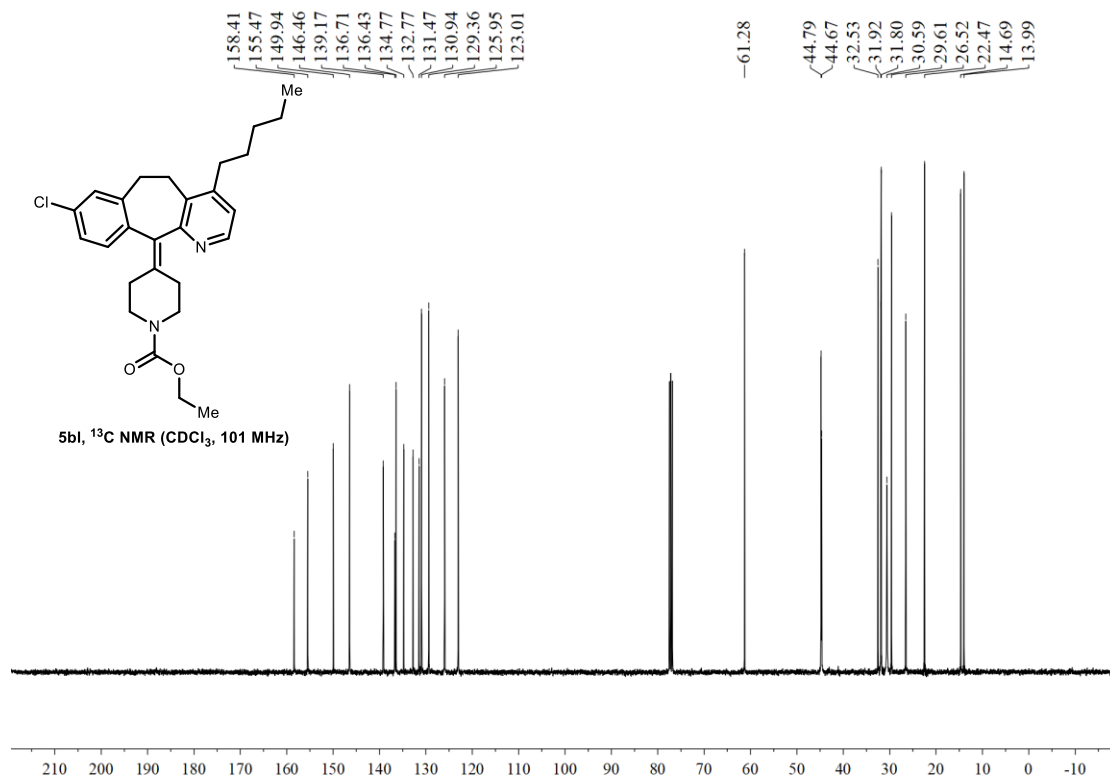

**Figure S198. <sup>13</sup>C NMR of 5bl (CDCl<sub>3</sub>, 101 MHz)**

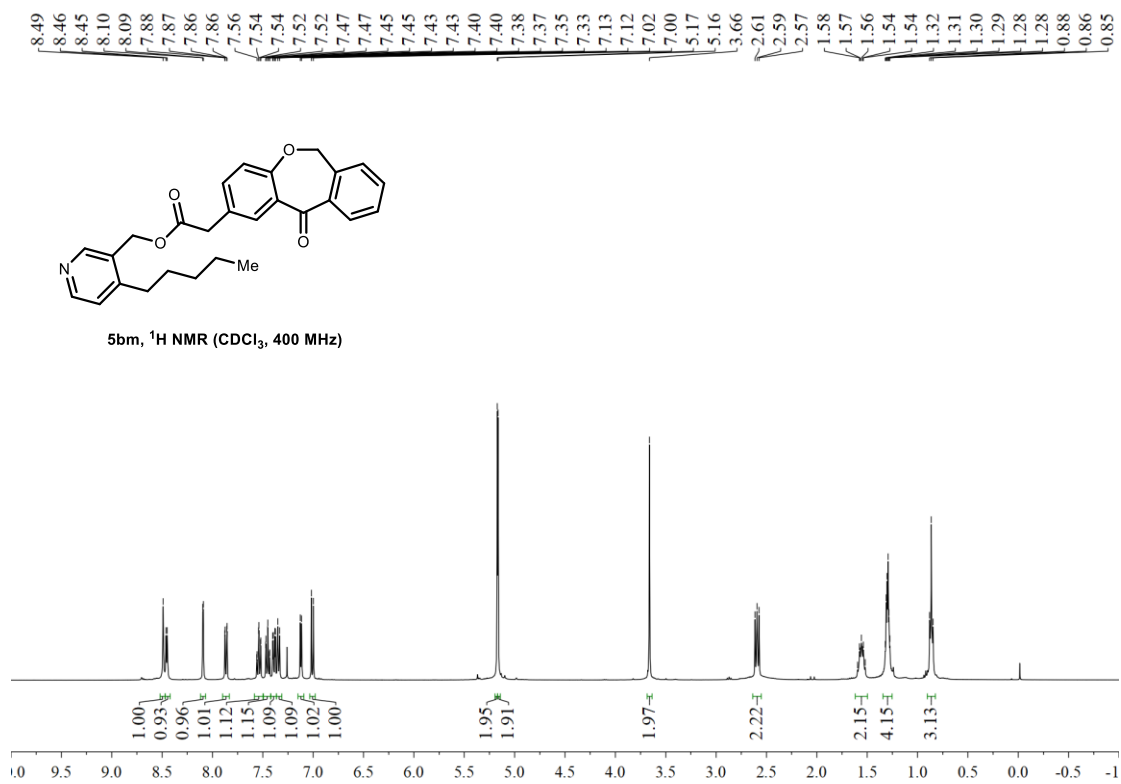

**Figure S199.**  $^1\text{H}$  NMR of **5bm** ( $\text{CDCl}_3$ , 400 MHz)

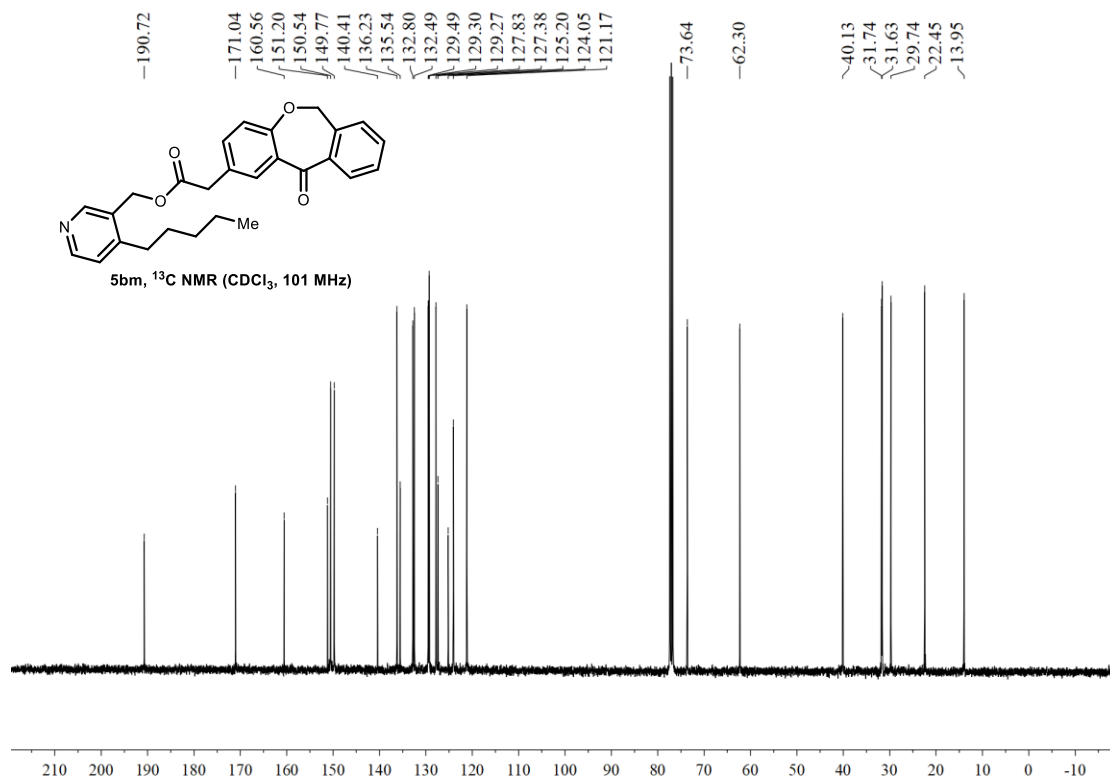

**Figure S200.**  $^{13}\text{C}$  NMR of **5bm** ( $\text{CDCl}_3$ , 101 MHz)

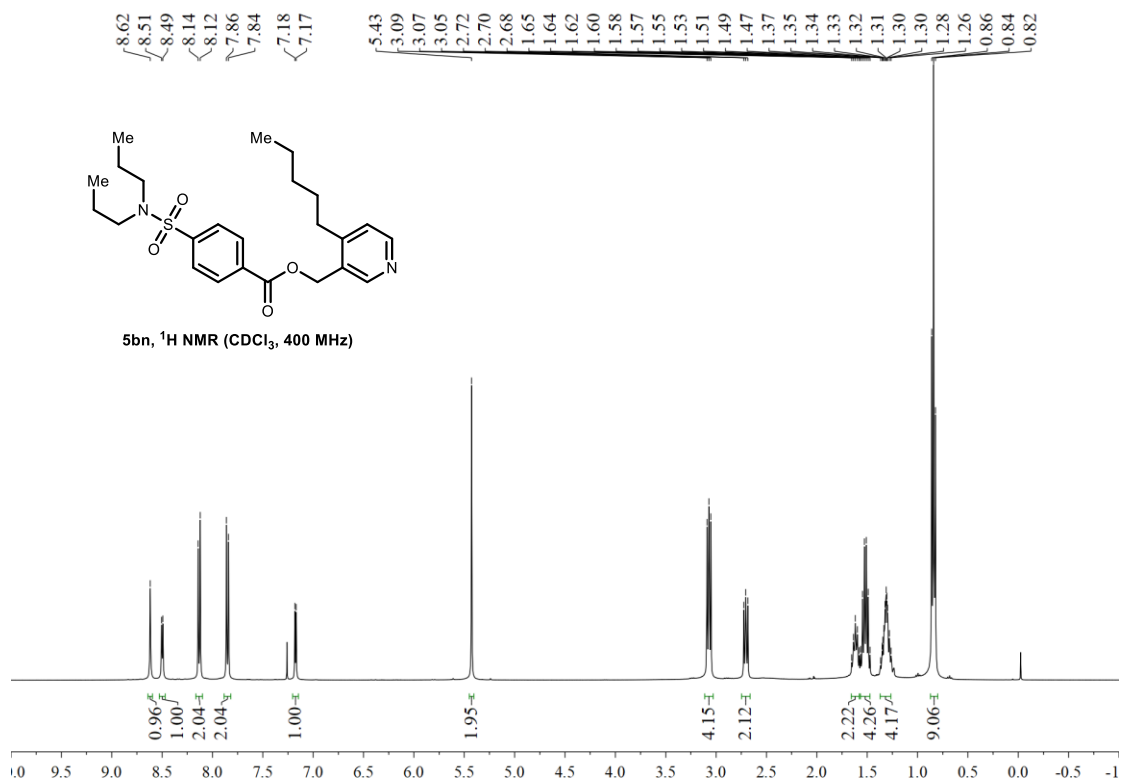

**Figure S201.**  $^1\text{H NMR}$  of **5bn** ( $\text{CDCl}_3$ , 400 MHz)

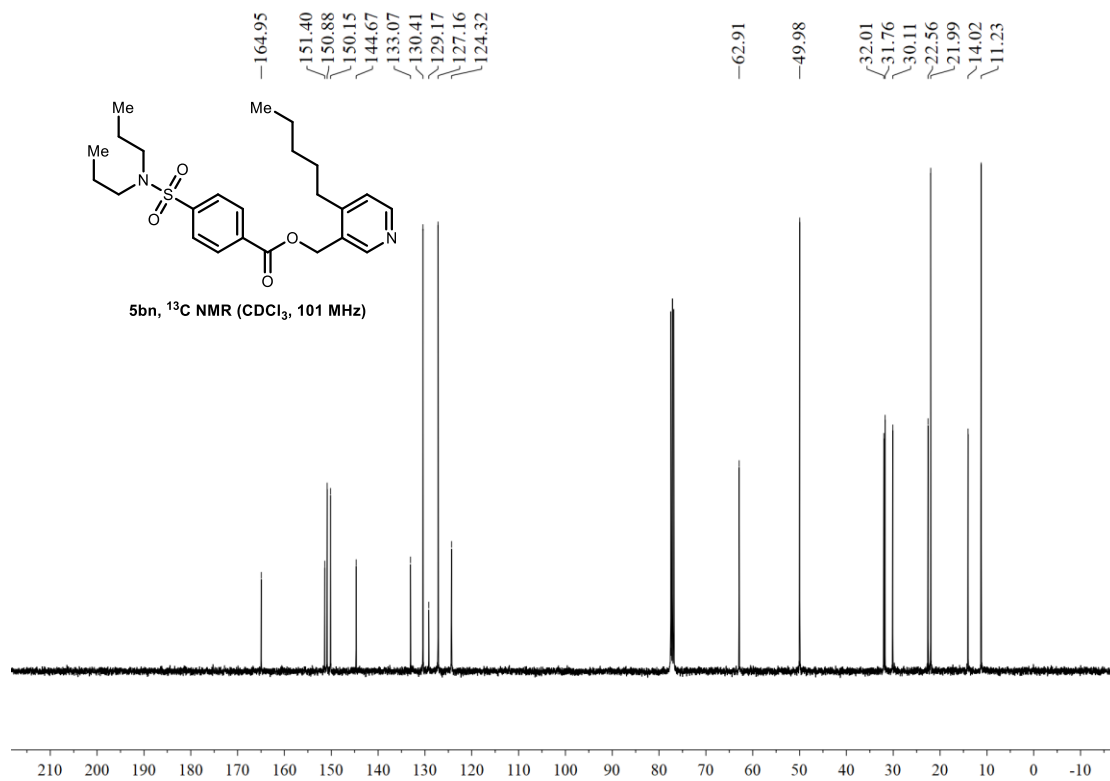

**Figure S202.**  $^{13}\text{C NMR}$  of **5bn** ( $\text{CDCl}_3$ , 101 MHz)

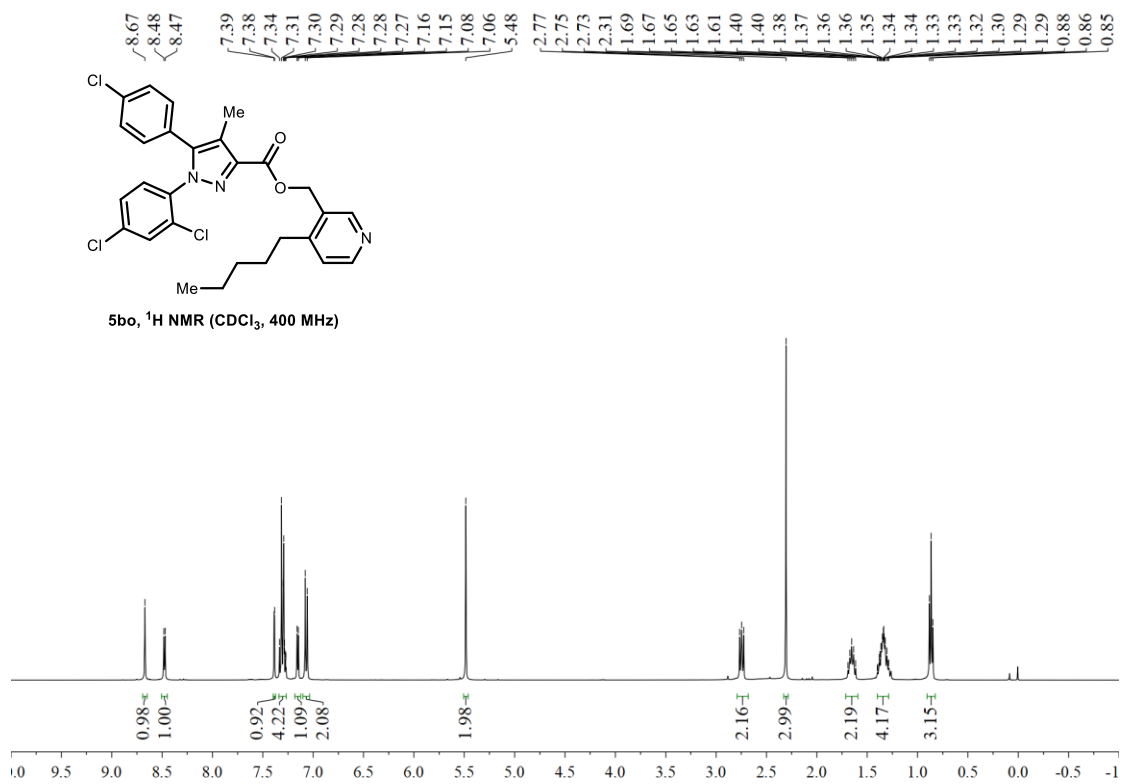

**Figure S203.**  $^1\text{H}$  NMR of **5bo** ( $\text{CDCl}_3$ , 400 MHz)

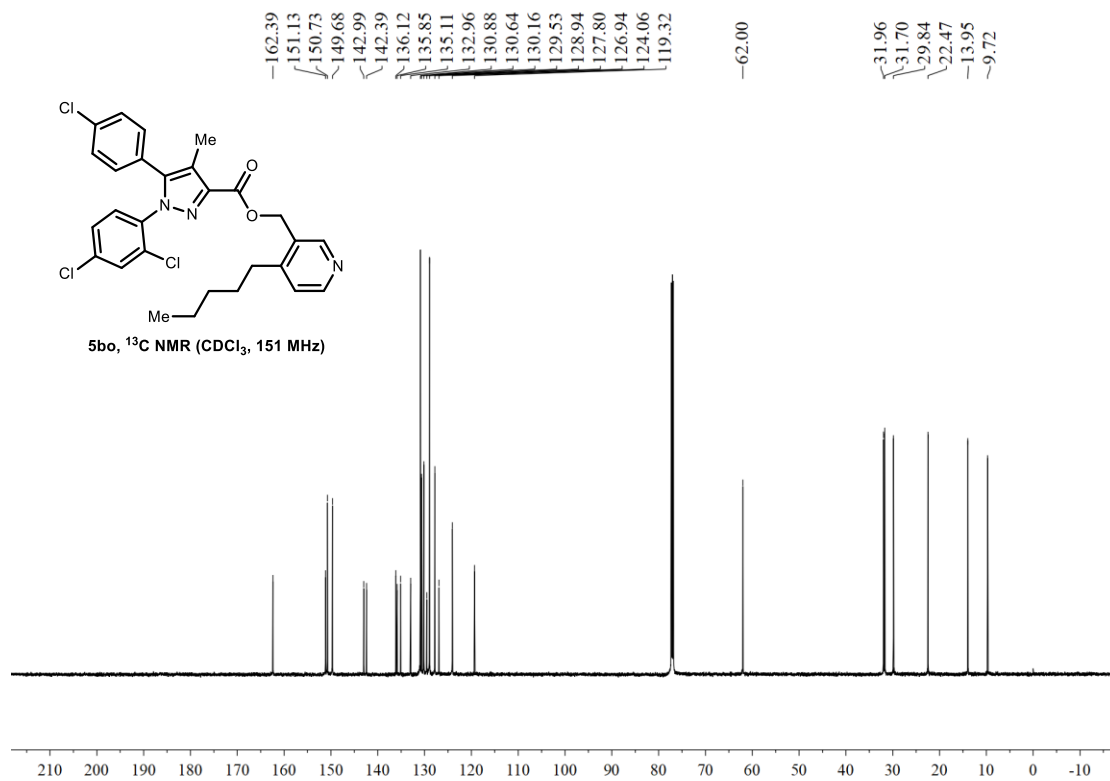

**Figure S204.**  $^{13}\text{C}$  NMR of **5bo** ( $\text{CDCl}_3$ , 151 MHz)

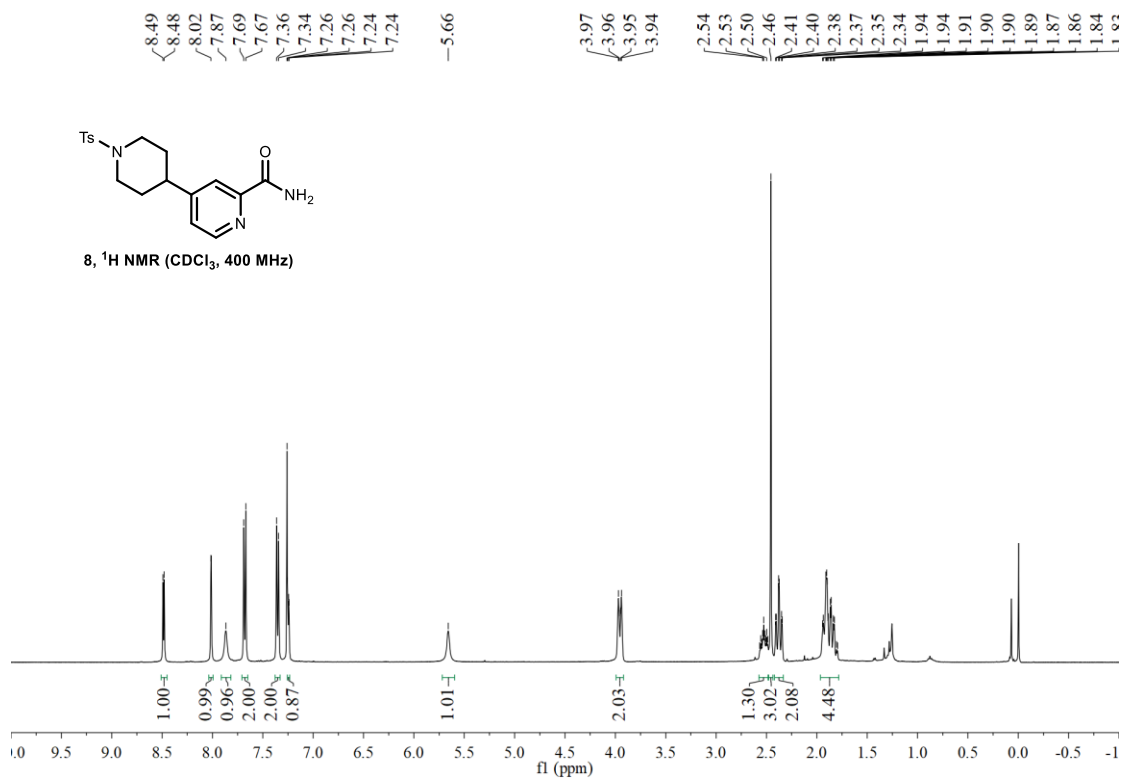

**Figure 205.** <sup>1</sup>H NMR of **8** (CDCl<sub>3</sub>, 400 MHz)

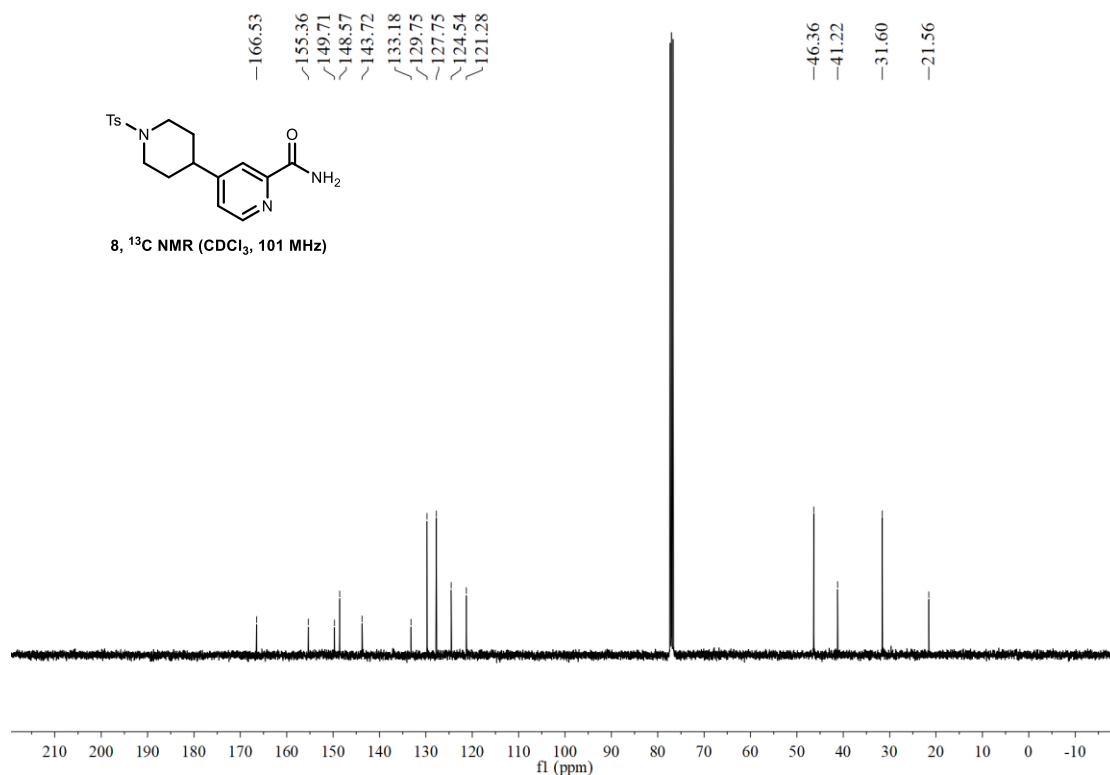

**Figure S206.** <sup>13</sup>C NMR of **8** (CDCl<sub>3</sub>, 101 MHz)



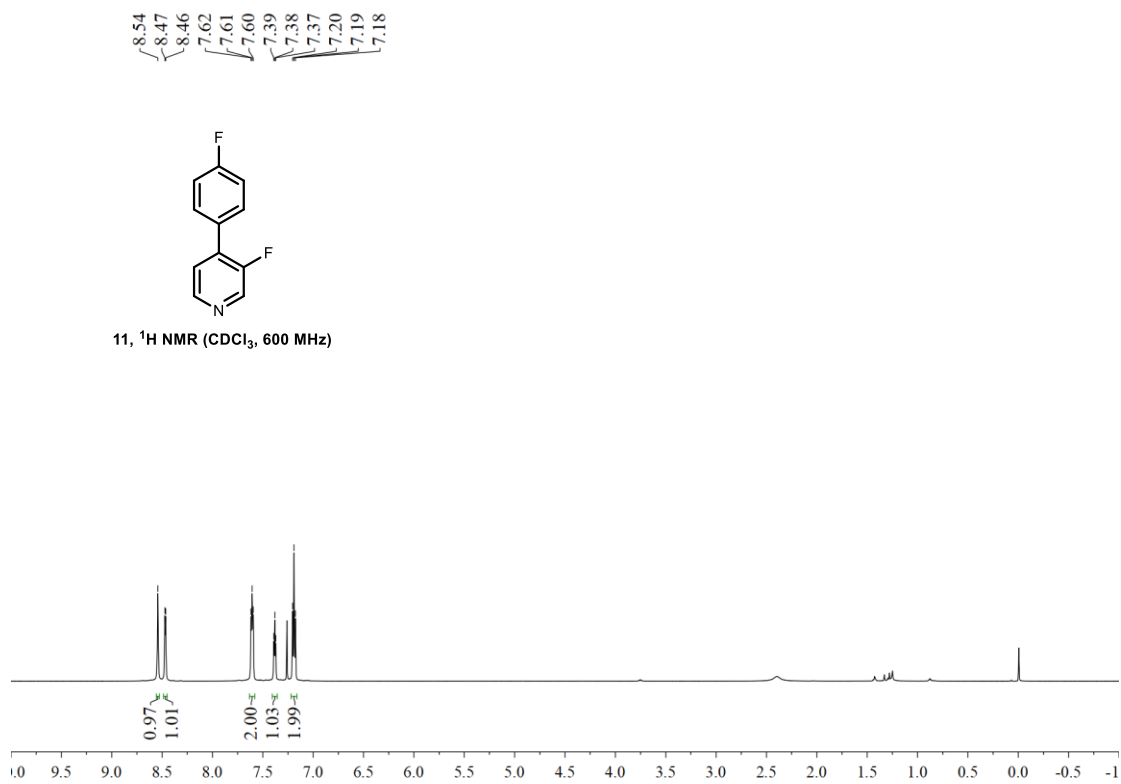

Figure S207.  $^1\text{H NMR}$  of 11 ( $\text{CDCl}_3$ , 600 MHz)

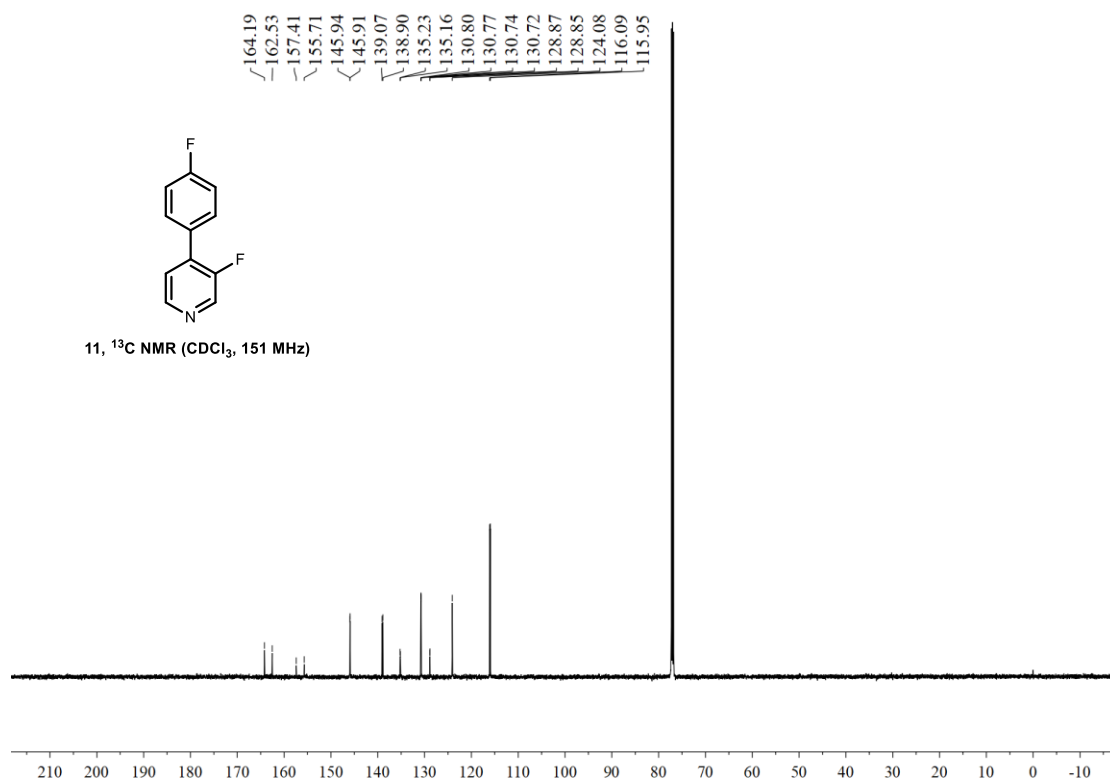

Figure S208.  $^{13}\text{C NMR}$  of 11 ( $\text{CDCl}_3$ , 151 MHz)

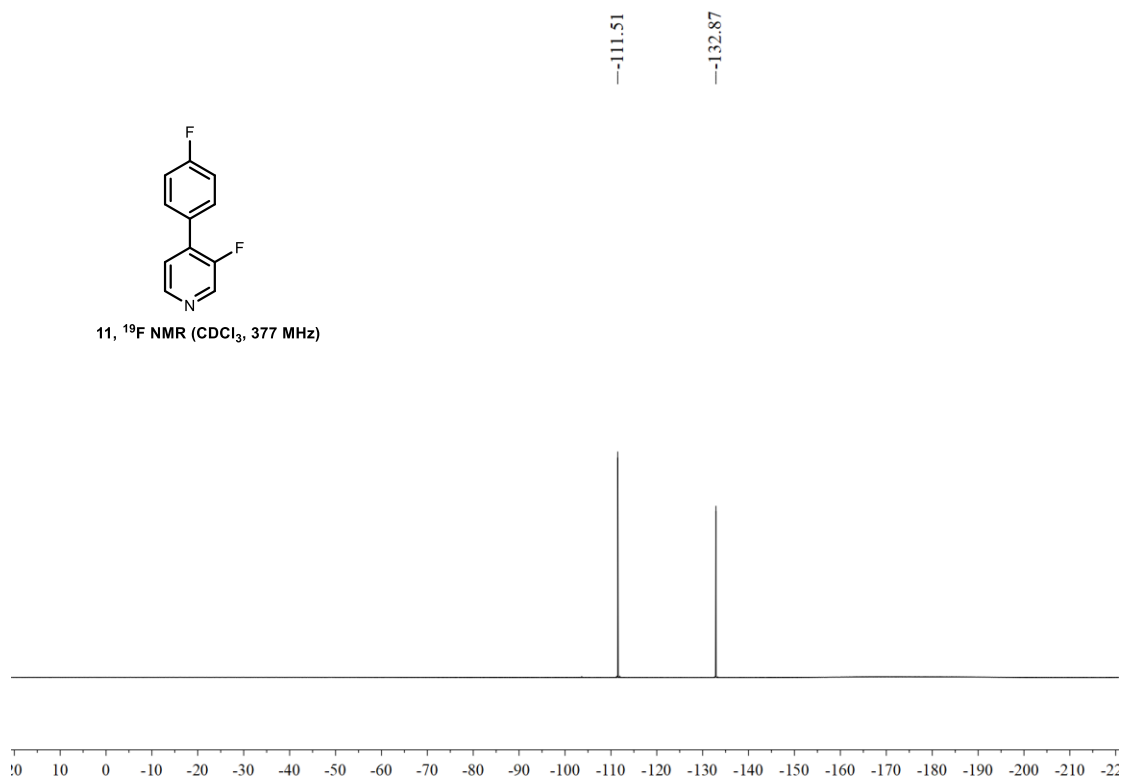

**Figure S209.**  $^{19}\text{F}$  NMR of **11** ( $\text{CDCl}_3$ , 377 MHz)

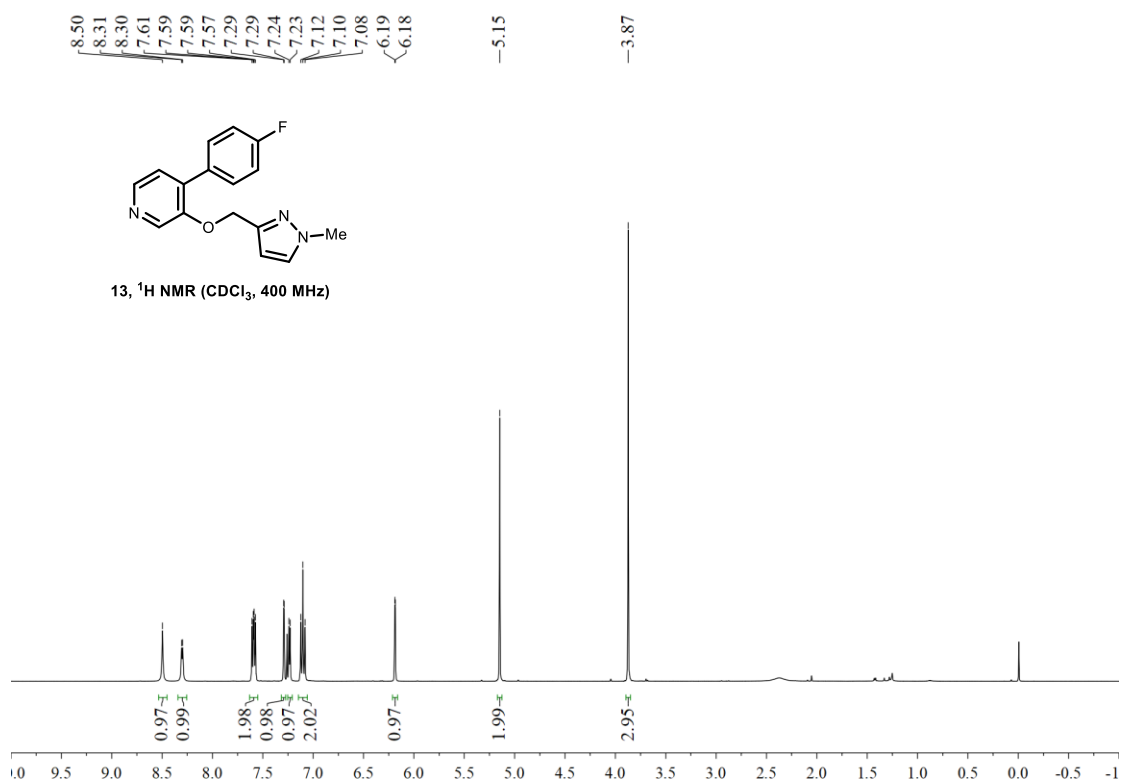

**Figure S210.**  $^1\text{H}$  NMR of **13** ( $\text{CDCl}_3$ , 400 MHz)

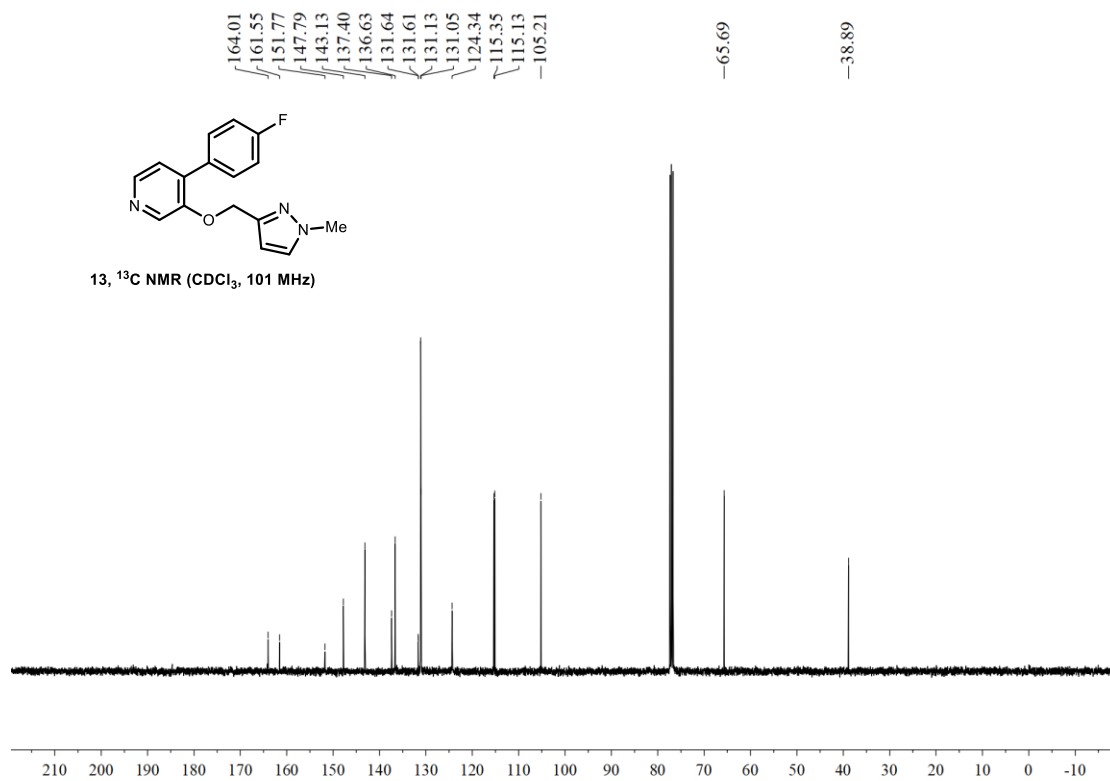

**Figure S211.**  $^{13}\text{C}$  NMR of **13** ( $\text{CDCl}_3$ , 101 MHz)

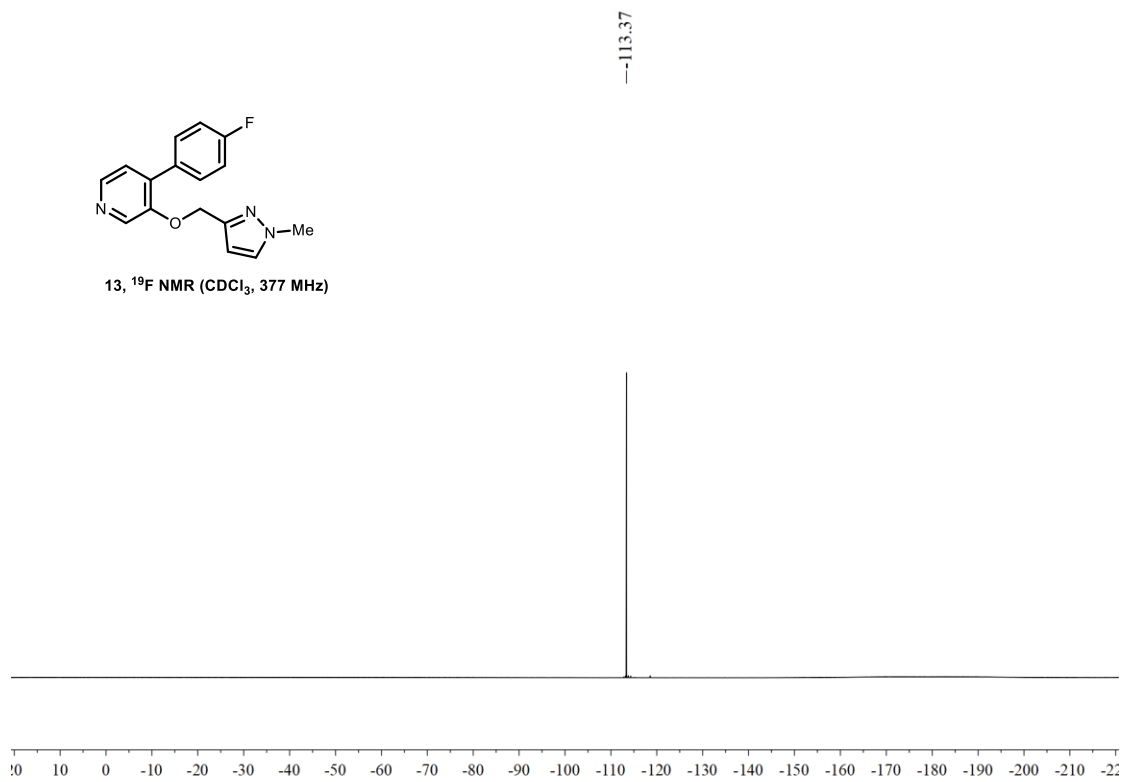

**Figure S212.**  $^{19}\text{F}$  NMR of **13** ( $\text{CDCl}_3$ , 377 MHz)

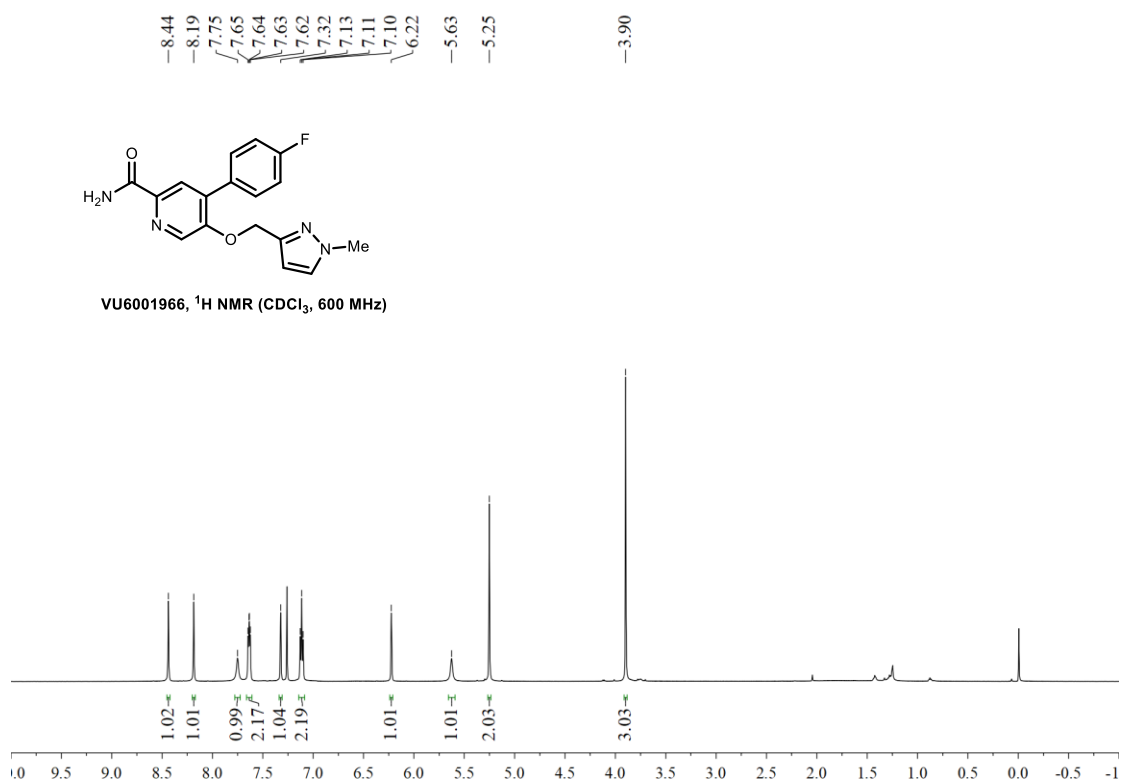

**Figure S213.**  $^1\text{H NMR}$  of VU6001966 ( $\text{CDCl}_3$ , 600 MHz)

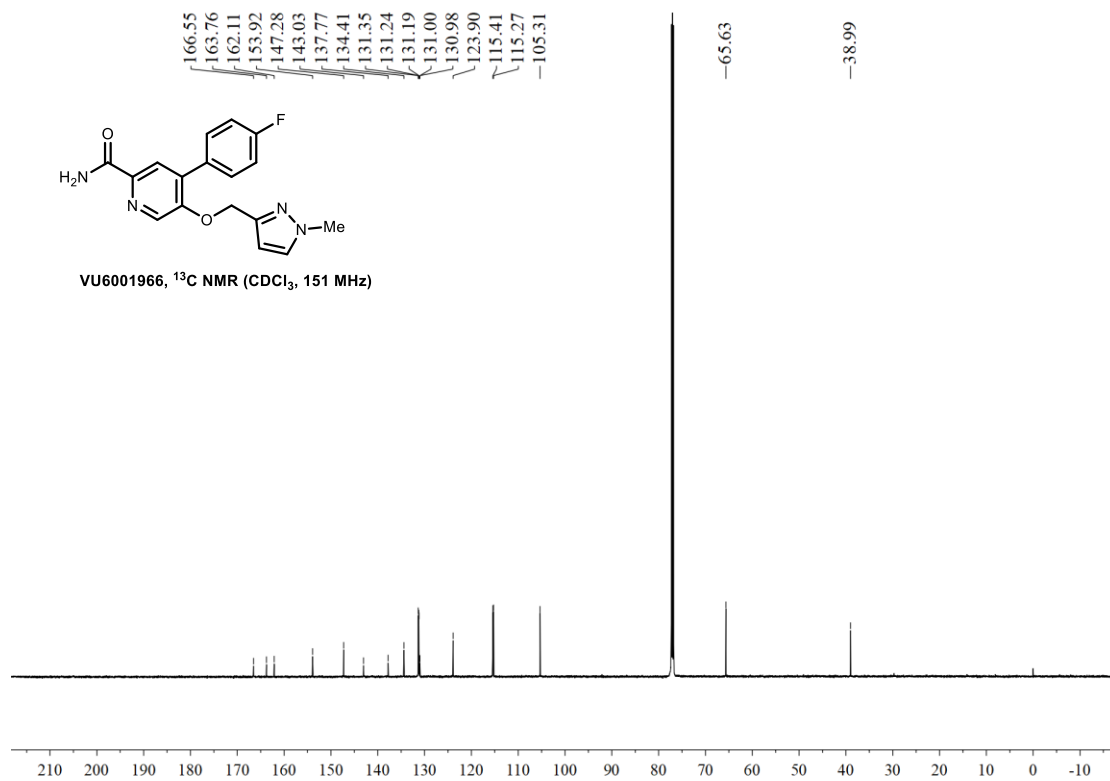

**Figure S214.**  $^{13}\text{C NMR}$  of VU6001966 ( $\text{CDCl}_3$ , 151 MHz)

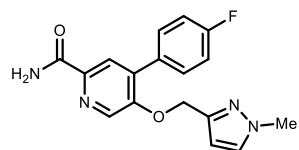

VU6001966,  $^{19}\text{F}$  NMR ( $\text{CDCl}_3$ , 565 MHz)

-112.78

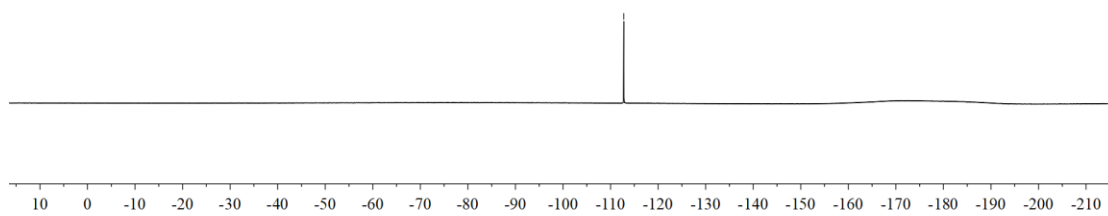

Figure S215.  $^{19}\text{F}$  NMR of VU6001966 ( $\text{CDCl}_3$ , 565 MHz)

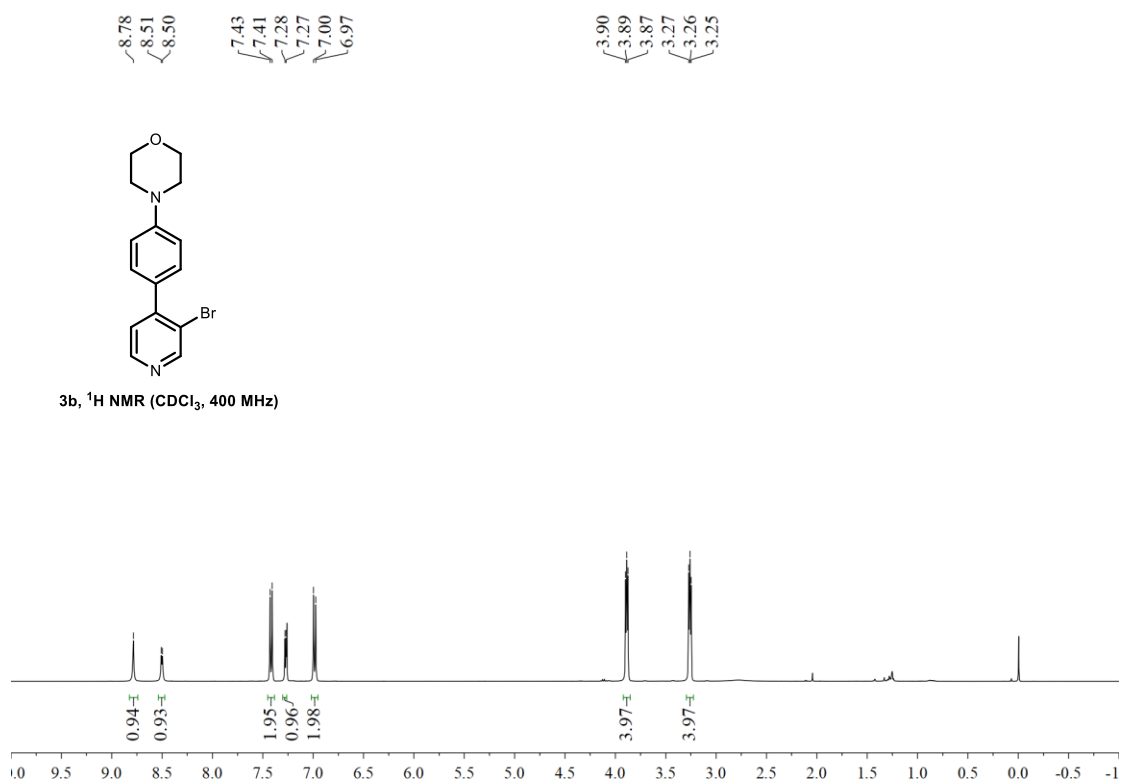

Figure S216.  $^1\text{H NMR}$  of 17 ( $\text{CDCl}_3$ , 400 MHz)

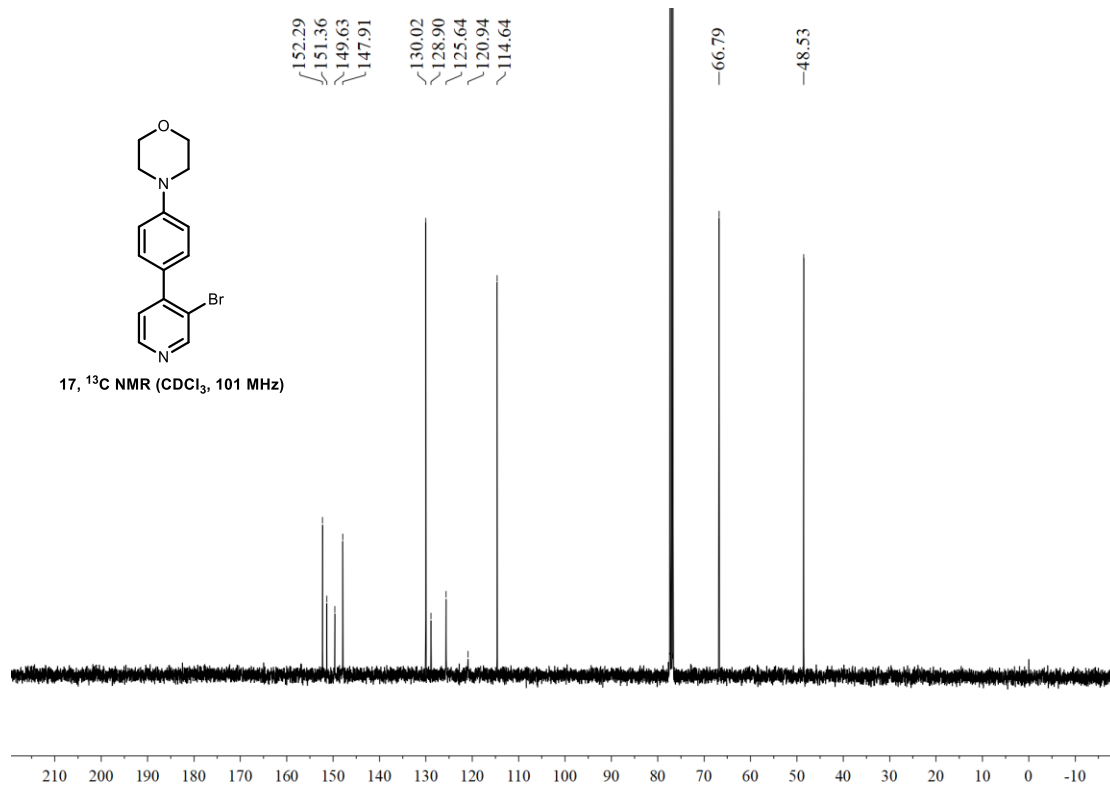

Figure S217.  $^{13}\text{C NMR}$  of 17 ( $\text{CDCl}_3$ , 101 MHz)

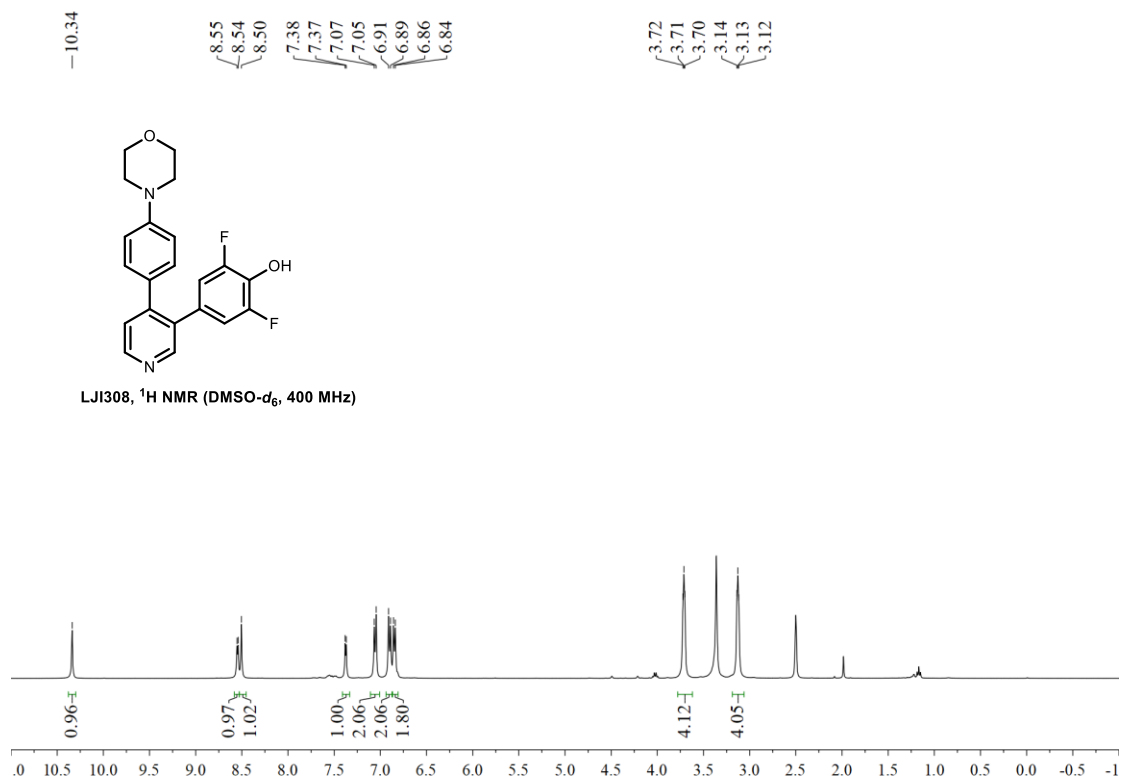

**Figure S218.**  $^1\text{H}$  NMR of LJI308 (DMSO- $d_6$ , 400 MHz)

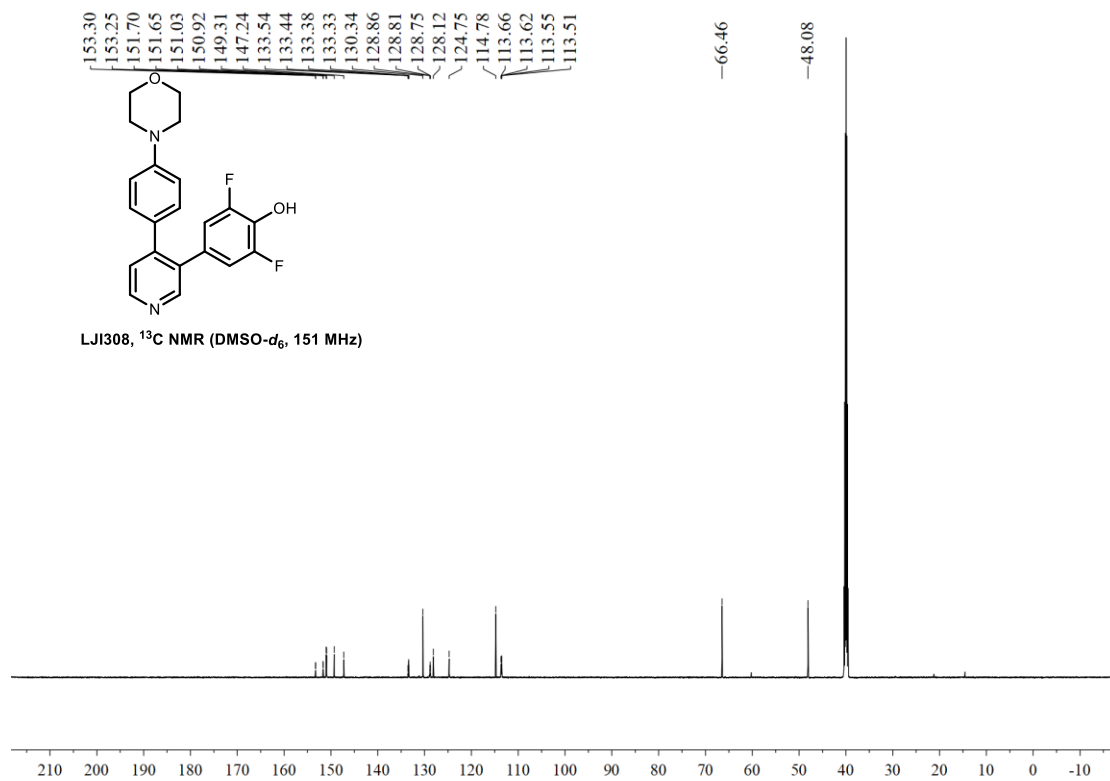

**Figure S219.**  $^{13}\text{C}$  NMR of LJI308 (DMSO- $d_6$ , 151 MHz)



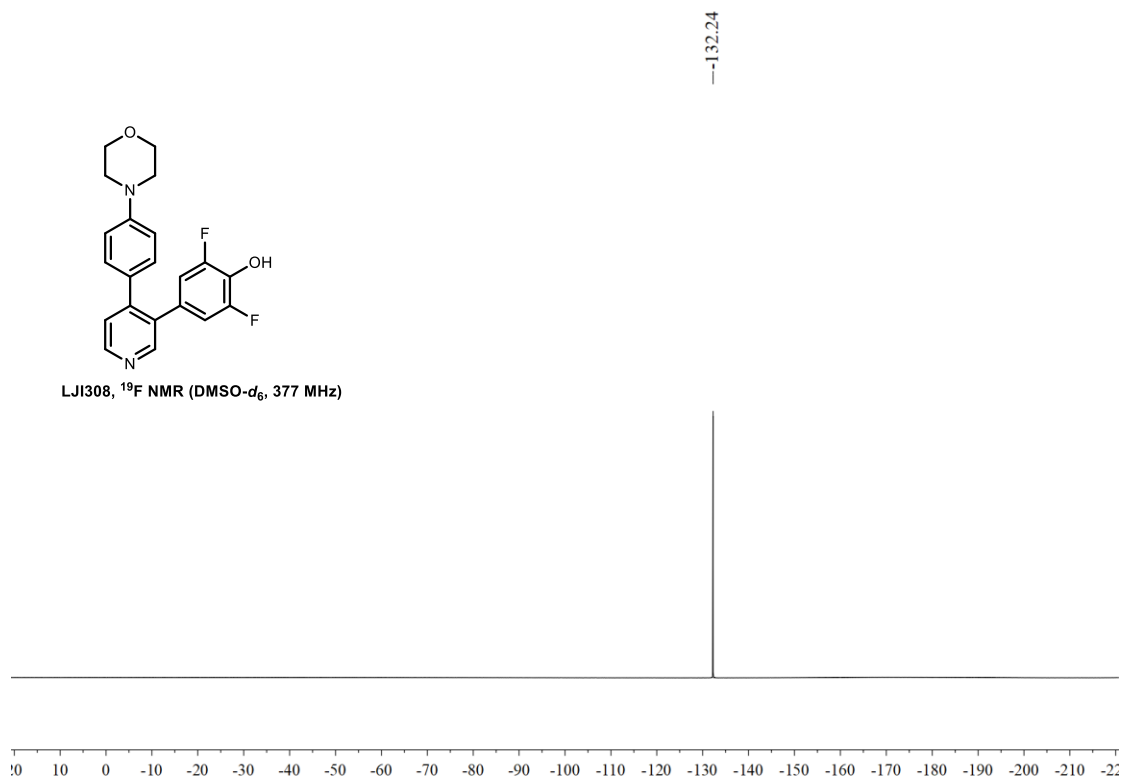

**Figure S220.**  $^{19}\text{F}$  NMR of LJI308 (DMSO- $d_6$ , 377 MHz)
